# Supplementary material for: Synergistic Network Pharmacology for Traditional Chinese Medicine Liangxue Tongyu Formula in Acute Intracerebral Hemorrhagic Stroke
Source: Neural Plast. 2021 Feb 26;2021:8874296. doi: 10.1155/2021/8874296 (PMC7936909; doi:10.1155/2021/8874296)
Supplement: Supplementary Materials — S1 Table. 517 compounds of 8 herbs in LXTYF collected from TCMSP and BATMAN-TCM database. S2 Table. 874 targets of the active ingredients obtained from the TCMSP. S3 Table. 149 targets of active components predicted from the SwissTargetPrediction database. S4 Table. 2315 targets relating to ICH collected from GAD, Genecards, and DisGeNET database. S5 Table. Topological parameters of component-target network. S6 Table. Proteins-proteins interaction information of LXTYF targets for AICH in STRING 11.0. S7 Table. Topological parameters of the PPI network. S8 Table. Results of putative targets for KEGG pathway enrichment analysis. S9 Table. Detailed information of 583 differentially expressed mRNAs identified between MGT and MG. S10 Table. Details of the Herb-Compound-Target-Pathway(H-C-T-P) network connection verified in RNA-seq. [file 8874296.f1.zip]

Archive with 10 entries (9 files):
- Supplementary Table S1-S10/
- Supplementary Table S1-S10/S1 Table.xlsx
- Supplementary Table S1-S10/S10 Table.xlsx
- Supplementary Table S1-S10/S2 and S3 Table.xlsx
- Supplementary Table S1-S10/S4 Table.xlsx
- Supplementary Table S1-S10/S5 Table.xlsx
- Supplementary Table S1-S10/S6 Table.xlsx
- Supplementary Table S1-S10/S7 Table.xlsx
- Supplementary Table S1-S10/S8 Table.xlsx
- Supplementary Table S1-S10/S9 Table.xlsx
