# Supplementary material for: Synergistic Network Pharmacology for Traditional Chinese Medicine Liangxue Tongyu Formula in Acute Intracerebral Hemorrhagic Stroke
Source: Neural Plast. 2021 Feb 26;2021:8874296. doi: 10.1155/2021/8874296 (PMC7936909; doi:10.1155/2021/8874296)
Supplement: Supplementary Materials — S1 Table. 517 compounds of 8 herbs in LXTYF collected from TCMSP and BATMAN-TCM database. S2 Table. 874 targets of the active ingredients obtained from the TCMSP. S3 Table. 149 targets of active components predicted from the SwissTargetPrediction database. S4 Table. 2315 targets relating to ICH collected from GAD, Genecards, and DisGeNET database. S5 Table. Topological parameters of component-target network. S6 Table. Proteins-proteins interaction information of LXTYF targets for AICH in STRING 11.0. S7 Table. Topological parameters of the PPI network. S8 Table. Results of putative targets for KEGG pathway enrichment analysis. S9 Table. Detailed information of 583 differentially expressed mRNAs identified between MGT and MG. S10 Table. Details of the Herb-Compound-Target-Pathway(H-C-T-P) network connection verified in RNA-seq. [file 8874296.f1.zip › Supplementary Table S1-S10/S1 Table.xlsx]

## Sheet: Table S1
Table S1. 517 compounds of 8 herbs in LXTYF.
Herb	Mol ID	Molecule Name	MW	AlogP	Hdon	Hacc	OB (%)	Caco-2	BBB	DL	FASA-	HL
CS	MOL001002	ellagic acid	302.2	1.48	4	8	43.06	-0.44	-1.41	0.43	0.43	-1.04
CS	MOL000106	PYG	126.12	1.03	3	3	22.98	0.69	0.79	0.02	0.4	——
CS	MOL000114	vanillic acid	168.16	1.15	2	4	35.47	0.43	0.09	0.04	0.34	11.62
CS	MOL000131	EIC	280.5	6.39	1	2	41.9	1.16	0.9	0.14	0.25	7.5
CS	MOL001801	salicylic acid	138.13	1.17	2	3	32.13	0.63	0.63	0.03	0.43	12
CS	MOL001906	Methylgallate	184.16	0.88	3	5	30.91	0.26	0.06	0.05	0.32	5.67
CS	MOL001907	Progallin A	198.19	1.23	3	5	25.61	0.33	0.11	0.06	0.34	——
CS	MOL001918	paeoniflorgenone	318.35	0.79	1	6	87.59	-0.09	-0.56	0.37	0.37	7.45
CS	MOL001921	Lactiflorin	462.49	-0.57	3	10	49.12	-1.13	-1.76	0.8	0.34	7.26
CS	MOL001924	paeoniflorin	480.51	-1.28	5	11	53.87	-1.47	-1.86	0.79	0.34	13.88
CS	MOL001925	paeoniflorin_qt	318.35	0.46	2	6	68.18	-0.34	-0.73	0.4	0.39	8.81
CS	MOL001932	galloylpaeoniflorin	632.62	-0.04	7	15	3.03	-1.77	-2.78	0.42	0.36	——
CS	MOL000219	BOX	121.12	0.76	0	2	31.55	0.54	0.84	0.02	0.11	12.07
CS	MOL002714	baicalein	270.25	2.33	3	5	33.52	0.63	-0.05	0.21	0.36	16.25
CS	MOL002776	Baicalin	446.39	0.64	6	11	40.12	-0.85	-1.74	0.75	0.36	17.36
CS	MOL000357	Sitogluside	576.95	6.34	4	6	20.63	-0.14	-0.93	0.62	0.23	——
CS	MOL000358	beta-sitosterol	414.79	8.08	1	1	36.91	1.32	0.99	0.75	0.23	5.36
CS	MOL000359	sitosterol	414.79	8.08	1	1	36.91	1.32	0.87	0.75	0.22	5.37
CS	MOL000361	Amyrin	426.8	7.3	1	1	17.6	1.45	1.29	0.76	0.22	——
CS	MOL004355	Spinasterol	412.77	7.64	1	1	42.98	1.44	1.04	0.76	0.21	5.32
CS	MOL000449	Stigmasterol	412.77	7.64	1	1	43.83	1.44	1	0.76	0.22	5.57
CS	MOL000463	16844-71-6	428.82	7.49	1	1	27.34	1.45	1.28	0.76	0	——
CS	MOL000492	(+)-catechin	290.29	1.92	5	6	54.83	-0.03	-0.73	0.24	0	0.61
CS	MOL000508	Friedelin	426.8	7.3	0	1	29.16	1.43	1.38	0.76	0	——
CS	MOL005090	oxypaeoniflorin_qt	334.35	0.2	3	7	19.4	-0.77	-1.28	0.44	0.39	——
CS	MOL000513	3,4,5-trihydroxybenzoic acid	170.13	0.63	4	5	31.69	-0.09	-0.54	0.04	0.41	11.78
CS	MOL000578	arbutin	272.28	-0.61	5	7	6.82	-0.93	-1.25	0.15	0.29	——
CS	MOL000579	hydroquinone	110.12	1.3	2	2	29.26	0.89	0.75	0.02	0.43	——
CS	MOL006179	2-(6-carboxy-2,3,4-trihydroxyphenyl)-3,4,5-trihydroxybenzoic acid	338.24	0.95	8	10	15.21	-0.77	-1.26	0.27	0	——
CS	MOL006765	peonidin	301.29	1.92	4	6	26.92	0.27	-0.41	0.27	0.32	——
CS	MOL006798	pedunculagin	784.57	1.83	13	22	37.81	-2.7	-3.63	0.07	0.38	8.55
CS	MOL000069	palmitic acid	256.48	6.37	1	2	19.3	1.09	1	0.1	0	——
CS	MOL006990	(1S,2S,4R)-trans-2-hydroxy-1,8-cineole-B-D-glucopyranoside	332.44	-0.57	4	7	30.25	-0.77	-1.14	0.27	0.25	0.98
CS	MOL006991	60761-00-4	170.28	1.18	1	2	45.44	0.89	0.91	0.06	0.24	11.43
CS	MOL006992	(2R,3R)-4-methoxyl-distylin	318.3	1.89	4	7	59.98	0.17	-0.61	0.3	0.33	15.08
CS	MOL006993	1-o-beta-d-glucopyranosyl-8-o-benzoylpaeonisuffrone	464.51	-1.31	4	10	12.62	-1.05	-1.54	0.77	0.34	——
CS	MOL006994	1-o-beta-d-glucopyranosyl-8-o-benzoylpaeonisuffrone_qt	302.35	0.44	1	5	36.01	-0.03	-0.47	0.3	0.41	5.98
CS	MOL006995	1-o-beta-d-glucopyranosylpaeonisuffrone	494.54	-1.24	4	11	26.62	-1.15	-1.66	0.78	0.29	——
CS	MOL006996	1-o-beta-d-glucopyranosylpaeonisuffrone_qt	332.38	0.51	1	6	65.08	-0.05	-0.49	0.35	0.38	7.19
CS	MOL006997	2-[(2R,5R,6R)-6,10-dimethylspiro[4.5]dec-9-en-2-yl]propan-2-ol	222.41	3.67	1	1	18.44	1.33	1.44	0.09	0.26	——
CS	MOL009092	Pentagalloylglucose	940.72	3.69	15	26	3.01	-3.08	-4.17	0.21	0.45	——
CS	MOL006999	stigmast-7-en-3-ol	414.79	8.08	1	1	37.42	1.32	0.85	0.75	0.22	5.85
CS	MOL007000	2-methoxy-5-(e)-propenyl-phenol-beta-vicianoside	458.51	-0.64	6	11	4.38	-1.45	-1.79	0.65	0.25	——
CS	MOL007001	2-methoxy-5-[(Z)-prop-1-enyl]phenol	164.22	2.5	1	2	58.73	1.36	1.38	0.04	0.32	4.4
CS	MOL007002	paeonioflorin	480.51	-1.28	5	11	10.22	-1.69	-2.39	0.79	0.33	——
CS	MOL007003	benzoyl paeoniflorin	584.62	0.76	4	12	31.14	-1.35	-2.08	0.54	0.4	15.66
CS	MOL007004	Albiflorin	480.51	-1.33	5	11	30.25	-1.52	-2.33	0.77	0.35	7.83
CS	MOL007005	Albiflorin_qt	318.35	0.42	2	6	48.7	-0.38	-0.75	0.33	0.41	5.91
CS	MOL007006	oxypaeoniflorin	496.51	-1.55	6	12	12.98	-1.91	-2.7	0.78	0.34	——
CS	MOL007007	4-ethyl-paeoniflorin	494.54	-0.73	4	11	24.81	-0.94	-1.27	0.82	0.31	——
CS	MOL007008	4-ethyl-paeoniflorin_qt	332.38	1.02	1	6	56.87	-0.17	-0.52	0.44	0.35	8.88
CS	MOL007009	4-o-galloylalbiflorin	632.62	-0.09	7	15	3.09	-1.66	-2.45	0.61	0.36	——
CS	MOL007010	4-o-galloylalbiflorin_qt	470.46	1.66	4	10	2.14	-0.62	-1.19	0.8	0.44	——
CS	MOL007011	4-o-methyl-paeoniflorin	494.54	-0.87	4	11	25.71	-1.08	-1.62	0.78	0.28	——
CS	MOL007012	4-o-methyl-paeoniflorin_qt	332.38	0.87	1	6	56.7	0.4	-0.2	0.43	0.3	8.94
CS	MOL003867	Paeonolide	460.48	-1.85	6	12	6.3	-1.42	-2.09	0.64	0.3	——
CS	MOL007014	8-debenzoylpaeonidanin	390.43	-3.28	5	10	31.74	-1.56	-2.17	0.45	0.2	7.63
CS	MOL007015	8-debenzoylpaeonidanin_qt	228.27	-1.53	2	5	129.3	-0.55	-0.79	0.15	0.27	14.26
CS	MOL007016	Paeoniflorigenone	318.35	0.79	1	6	65.33	-0.13	-0.43	0.37	0.36	6.18
CS	MOL007017	9-ethyl-neo-paeoniaflorin A	496.56	-0.27	4	11	23.64	-1.26	-1.5	0.68	0.32	——
CS	MOL007018	9-ethyl-neo-paeoniaflorin A_qt	334.4	1.48	1	6	64.42	-0.01	-0.32	0.3	0.35	2.08
CS	MOL007019	Eugeniin	938.7	3.38	15	26	10.06	-2.4	-3.57	0.13	0.4	——
CS	MOL007020	Lactiflorin_qt	318.35	0.42	2	6	20.44	-0.42	-0.78	0.33	0.39	——
CS	MOL007021	trans-.beta.-Terpinyl benzoate	258.39	4.51	0	2	46.89	1.49	1.42	0.12	0.37	5.02
CS	MOL007022	evofolinB	318.35	2.07	3	6	64.74	0	-0.66	0.22	0.29	17.01
CS	MOL007023	galloylpaeoniflorine	632.62	-0.04	7	15	3.03	-1.69	-2.67	0.42	0.38	——
CS	MOL007024	galloylpaeoniflorine_qt 2	318.35	0.46	2	6	28.18	-0.34	-0.72	0.4	0.39	——
CS	MOL007025	isobenzoylpaeoniflorin	584.62	0.76	4	12	31.14	-0.85	-1.33	0.54	0.35	21.1
CS	MOL007026	paeonin,a	372.41	-2.06	4	9	20.35	-1.32	-1.76	0.37	0.27	——
CS	MOL007027	paeonin,a_qt	210.25	-0.31	1	4	73.79	0.16	-0.03	0.09	0.23	1.01
CS	MOL007028	paeonin,b	358.38	-2.47	5	9	17.29	-1.76	-2.51	0.34	0.3	——
CS	MOL007029	paeonin,b_qt	196.22	-0.72	2	4	105.45	-0.33	-0.64	0.08	0.28	2.27
CS	MOL007030	paeonin,c	372.41	-1.18	4	9	10.26	-1.21	-1.71	0.36	0.29	——
CS	MOL007031	paeonin,c_qt	210.25	0.57	1	4	72.7	0.14	-0.18	0.09	0.32	8.47
CS	MOL000874	paeonol	166.19	1.29	1	3	28.79	0.93	0.84	0.04	0.32	——
CS	MOL000023	Hemo-sol	136.26	3.5	0	0	39.84	1.83	2.12	0.02	0	11.68
CS	MOL000172	Furol	96.09	0.99	0	2	34.35	1.08	1.51	0.01	0.2	4.53
CS	MOL000202	Moslene	136.26	3.45	0	0	33.02	1.88	2.05	0.02	0.27	11.08
CS	MOL000244	()-Borneol	154.28	1.98	1	1	81.8	1.22	1.47	0.05	0.24	11.36
CS	MOL000254	eugenol	164.22	2.55	1	2	56.24	1.35	1.32	0.04	0.32	0.92
CS	MOL000305	lauric acid	200.36	4.54	1	2	23.59	1.02	1.1	0.04	0	——
CS	MOL000607	Dehydro-p-cymene	132.22	3.31	0	0	11.63	1.88	1.93	0.02	0.44	——
CS	MOL000610	TRD	184.41	6.3	0	0	17.89	1.78	1.96	0.03	0.19	——
CS	MOL000666	hexanal	100.18	1.85	0	1	55.71	1.25	1.52	0.01	0.23	10.96
CS	MOL000675	oleic acid	282.52	6.84	1	2	33.13	1.17	0.78	0.14	0.2	4.99
CS	MOL000708	WLN: VHR	106.13	1.59	0	1	32.63	1.32	1.66	0.01	0.44	12.07
CS	MOL000842	sucrose	342.34	-4.31	8	11	7.17	-2.89	-6.67	0.23	0.2	——
CS	MOL000865	hexadecane	226.5	7.67	0	0	12.32	1.81	1.85	0.06	0.14	——
CS	MOL000867	Heptadekan	240.53	8.13	0	0	8.64	1.84	1.87	0.07	0.14	——
CS	MOL000868	LFA	282.62	9.5	0	0	8.46	1.83	1.8	0.13	0.13	——
CS	MOL000869	Henicosane	296.65	9.95	0	0	8.41	1.84	1.8	0.15	0.13	——
CS	MOL000879	methyl palmitate	270.51	6.62	0	2	18.09	1.37	1.18	0.12	0.14	——
CS	MOL000880	Tricosane	324.71	10.86	0	0	8.33	1.85	1.68	0.21	0.13	——
CS	MOL000971	Ethylpalmitate	284.54	6.97	0	2	18.99	1.41	1.15	0.14	0.16	——
CS	MOL001392	Methyl myristate	242.45	5.71	0	2	19.68	1.36	1.19	0.08	0.14	——
CS	MOL001393	myristic acid	228.42	5.46	1	2	21.18	1.07	0.99	0.07	0.19	——
CS	MOL001394	Oktadekan	254.56	8.58	0	0	9.81	1.83	1.83	0.09	0.14	——
CS	MOL001396	PENTADECYLIC ACID	242.45	5.91	1	2	20.18	1.08	0.88	0.08	0.18	——
CS	MOL001399	TWT	310.68	10.41	0	0	8.37	1.85	1.64	0.18	0.13	——
CS	MOL001401	HEXACOSANE	366.8	12.23	0	0	8.21	1.92	1.65	0.31	0.12	——
CS	MOL001619	UPL	268.59	9.04	0	0	8.52	1.83	1.7	0.11	0.16	——
CS	MOL001641	METHYL LINOLEATE	294.53	6.64	0	2	41.93	1.44	1.08	0.17	0.21	6.05
CS	MOL001746	ELD	281.54	6.23	2	2	31.2	1.26	1.07	0.14	0.19	4.84
CS	MOL001747	Tetracosane	338.74	11.32	0	0	8.28	1.88	1.62	0.24	0.15	——
CS	MOL001752	EUG	150.19	2.1	1	2	38.39	1.36	1.35	0.03	0.36	11.57
CS	MOL001935	(3aR,6S,7aR)-6-hydroxy-6-methyl-3-methylene-3a,4,7,7a-tetrahydrobenzofuran-2,5-dione	196.22	-0.1	1	4	97.79	-0.01	-0.13	0.08	0.39	13.98
CS	MOL002092	Antioxidant No. 33	206.36	4.36	1	1	26.74	1.68	1.81	0.06	0.28	——
CS	MOL002850	butylated hydroxytoluene	220.39	4.85	1	1	40.02	1.75	1.8	0.07	0.3	10.36
CS	MOL002883	Ethyl oleate (NF)	310.58	7.44	0	2	32.4	1.4	1.1	0.19	0.19	4.85
CS	MOL003032	BZM	212.26	3.27	0	2	18.64	1.36	1.18	0.09	0.47	——
CS	MOL004929	Pentadecanol	228.47	5.99	1	1	13.73	1.3	1.06	0.06	0	——
CS	MOL005043	campest-5-en-3beta-ol	400.76	7.63	1	1	37.58	1.32	0.94	0.71	0.23	4.43
CS	MOL005089	Oxypaeoniflorin	496.51	-1.55	6	12	8.38	-1.62	-2.33	0.78	0.33	——
CS	MOL005368	Methyl tricosanoate	368.72	9.81	0	2	14.61	1.43	1.08	0.33	0.16	——
CS	MOL005470	Durol	134.24	3.78	0	0	17.74	1.91	1.98	0.03	0.37	——
CS	MOL005610	WLN: QR BV1	136.16	1.3	1	2	24.15	1.12	1.26	0.03	0.43	——
CS	MOL009569	4,7-DIMETHYLBENZOFURAN	146.2	3.11	0	1	55.66	1.8	1.82	0.04	0.26	5.88
CS	MOL010564	NK	122.13	1.32	1	2	32.1	0.89	0.87	0.02	0.42	12.07
CS	MOL012220	Saligenol	124.15	0.96	2	2	29.43	0.7	0.53	0.02	0.35	——
DaH	MOL001237	o-Acetyltoluene	134.19	2.06	0	1	38.96	1.47	1.66	0.02	0.43	25.18
DaH	MOL001301	cis-Zimtsaeure	148.17	1.9	1	2	38.19	0.91	1.09	0.03	0.41	6.4
DaH	MOL001456	citric acid	192.14	-1.39	4	7	56.22	-1.11	-1.38	0.05	0.43	11.46
DaH	MOL001729	Crysophanol	254.25	2.76	2	4	18.64	0.62	-0.2	0.21	0.44	——
DaH	MOL001794	MAE	116.08	-0.01	2	4	65.06	-0.46	-0.73	0.01	0.35	12.07
DaH	MOL001880	OXL	90.04	-0.48	2	4	29.68	-0.64	-0.87	0.01	0.52	——
DaH	MOL001986	β-sitosterol	386.73	7.63	1	1	5.84	1.42	1.1	0.71	0.2	——
DaH	MOL002230	(+)-Catechin-pentaacetate	500.49	2.44	0	11	27.58	-0.65	-1.04	0.77	0.25	——
DaH	MOL002231	(-)-Epicatechin-pentaacetate	500.49	2.44	0	11	8	-0.59	-0.94	0.77	0.26	——
DaH	MOL002232	2-Cinnamoyl-glucose	310.33	0	4	7	17.02	-0.73	-1.19	0.22	0.36	——
DaH	MOL002233	2-Methyl cardol	330.56	7.77	2	2	3.56	1.46	0.95	0.28	0.25	——
DaH	MOL002234	2-Methyl-5-carboxymethyl-7-hydroxychromanone	236.24	1.24	2	5	14.8	0.06	-0.14	0.12	0.34	——
DaH	MOL002235	EUPATIN	360.34	1.99	3	8	50.8	0.53	-0.26	0.41	0.22	13.94
DaH	MOL002236	3,5-Di-O-galloyl-4-O-digalloylquinic acid	800.63	2.23	13	22	3.01	-2.61	-3.9	0.31	0.42	——
DaH	MOL002237	3-Carboxy-4-hydroxy-phenoxy glucoside	316.29	-1	6	9	13.85	-1.44	-2.07	0.22	0.35	——
DaH	MOL002238	3-Hydroxy-25-norfriedel-3,1(10)-dien-2-one-30-oic acid	454.71	5.78	2	4	18.4	0.41	-0.17	0.78	0.31	——
DaH	MOL002239	5-acetyl-7-hydroxy-2-methyl-chromone	218.22	1.37	1	4	30.25	0.37	-0.2	0.1	0.37	25.68
DaH	MOL002240	5-Carboxy-7-hydroxy-2-methyl-benzopyran-gamma-one	220.19	1.24	2	5	34.4	0.14	-0.26	0.11	0.37	12.43
DaH	MOL002241	Aloeemodin-omega-O-beta-D-glucopyranoside	432.41	-0.08	6	10	9.04	-1.34	-2.34	0.81	0.34	——
DaH	MOL002242	TPBO	146.2	1.89	0	1	24.23	1.42	1.46	0.03	0.49	——
DaH	MOL002243	Anthraglycoside B	432.41	0.59	6	10	27.06	-1.29	-1.98	0.8	0.35	——
DaH	MOL002244	Chrysophanol glucoside	416.41	0.86	5	9	20.06	-1.17	-1.98	0.76	0.36	——
DaH	MOL002245	Chrysophanol-8-O-beta-D-(6'-O-galloyl)-glucopyranoside	568.52	2.1	7	13	1.92	-1.48	-2.56	0.69	0.4	——
DaH	MOL003353	Emodinanthrone	256.27	3.06	3	4	24.72	0.8	0.24	0.21	0.39	——
DaH	MOL002247	Emodin-6-glucoside	432.41	0.59	6	10	16.09	-1.28	-2.14	0.8	0.33	——
DaH	MOL002248	Gallic acid-4-O-(6'-O-galloyl)-glucoside	484.4	-0.03	9	14	27.06	-1.82	-2.68	0.67	0.37	——
DaH	MOL002249	gallocatechin	306.29	1.65	6	7	2.26	-0.27	-1.11	0.27	0.33	——
DaH	MOL002250	[(2R,3R,4S,5R,6R)-3,5-dihydroxy-2-(3,4,5-trihydroxybenzoyl)oxy-6-[(3,4,5-trihydroxybenzoyl)oxymethyl]oxan-4-yl] 3,4,5-trihydroxybenzoate	636.51	1.21	11	18	3.01	-2.22	-3.05	0.54	0.4	——
DaH	MOL002251	Mutatochrome	552.96	10.9	0	1	48.64	1.97	0.84	0.61	0.32	15.73
DaH	MOL002252	palmidin B	494.52	4.79	5	7	1.21	-0.11	-1.19	0.69	0.39	——
DaH	MOL002253	Palmidin C	494.52	5.61	5	7	2.35	0.18	-0.86	0.69	0.41	——
DaH	MOL002254	Barolub	807.49	19.52	0	6	16.29	0.88	-0.06	0.22	0.21	——
DaH	MOL002366	Rheochrysin	446.44	0.84	5	10	18.31	-1.14	-1.91	0.82	0.31	——
DaH	MOL002256	1,8-dihydroxy-3-methoxy-2,6-dimethyl-9,10-anthraquinone	298.31	3.23	2	5	5.53	0.63	-0.27	0.29	0.33	——
DaH	MOL002257	Physcion-8-O-beta-D-glucopyranoside	462.44	0.57	6	11	8.2	-1.19	-2.06	0.85	0.3	——
DaH	MOL002258	Physcion-9-O-beta-D-glucopyranoside_qt	300.28	2.48	3	6	20.3	0.56	-0.33	0.3	0.31	——
DaH	MOL002259	Physciondiglucoside	608.6	-0.91	8	15	41.65	-2.64	-3.43	0.63	0.3	27.61
DaH	MOL002260	Procyanidin B-5,3'-O-gallate	730.67	4.6	12	16	31.99	-1.61	-2.88	0.32	0.39	5.98
DaH	MOL002261	ZINC04081604	314.51	3.58	0	2	15.23	0.88	0.53	0.44	0.3	——
DaH	MOL002262	5-[(Z)-2-(3-hydroxy-4-methoxy-phenyl)vinyl]resorcinol	258.29	3	3	4	76.25	0.66	-0.03	0.15	0.35	4.78
DaH	MOL002263	1-Cinnamoyl-3-hydroxy-11-methoxymeliacarpinin	696.81	-0.39	3	13	35.72	-0.58	-0.89	0.07	0.27	30.55
DaH	MOL002264	Rhapontisterone	496.71	-0.11	7	8	4.39	-1.84	-2.4	0.82	0.27	——
DaH	MOL002265	Rheidin B	508.5	5	5	8	1.21	-0.19	-1.23	0.65	0.43	——
DaH	MOL002266	Rheidin C	538.53	4.98	5	9	1.24	-0.18	-1.27	0.58	0.4	——
DaH	MOL002267	Rhein diglucoside	608.55	-1.93	9	16	2.93	-2.79	-3.44	0.63	0.34	——
DaH	MOL002268	rhein	284.23	1.88	3	6	47.07	-0.2	-0.99	0.28	0.47	32.12
DaH	MOL002269	Rheinoside A	610.57	-2.89	11	16	0.82	-3.17	-4.05	0.68	0.32	——
DaH	MOL002270	Rheinoside A_qt	448.41	-0.99	8	11	26.28	-1.87	-2.58	0.75	0.33	——
DaH	MOL002271	Rheumin	276.26	0.81	3	6	9.16	-0.23	-0.78	0.17	0.44	——
DaH	MOL002272	Sennidin C	524.5	3.91	6	9	1.28	-0.62	-1.63	0.61	0.4	——
DaH	MOL002368	Sennoside A	862.8	0.31	12	20	3.34	-3.7	-4.74	0.08	0.35	——
DaH	MOL002274	(9S)-9-[(9R)-2-carboxy-4,5-dihydroxy-10-oxo-9H-anthracen-9-yl]-4,5-dihydroxy-10-oxo-9H-anthracene-2-carboxylic acid	538.48	4.12	6	10	27.75	-0.91	-1.73	0.57	0.41	——
DaH	MOL002275	Sennoside C	848.82	0.1	12	19	3.99	-3.54	-4.8	0.09	0.34	——
DaH	MOL002276	Sennoside E_qt	524.5	3.91	6	9	50.69	-0.74	-1.56	0.61	0.37	33.6
DaH	MOL006832	beta-Glucogallin	332.29	-1.27	7	10	17.89	-1.58	-2.09	0.25	0.34	——
DaH	MOL002278	Sennoside E	920.84	0.23	12	22	3.02	-3.67	-4.89	0.06	0.38	——
DaH	MOL002279	Serotonin	176.24	1.28	4	2	42.99	0.59	-0.16	0.06	0.21	-2.87
DaH	MOL002280	Torachrysone-8-O-beta-D-(6'-oxayl)-glucoside	480.46	0.64	5	12	43.02	-1.23	-1.84	0.74	0.32	16.29
DaH	MOL002281	Toralactone	272.27	2.25	2	5	46.46	0.86	0.37	0.24	0.35	3.55
DaH	MOL002282	[Epicatechin-(48)]5-epicatechin	1727.69	10.07	30	34	4.02	-4.48	-7.15	0	0.35	——
DaH	MOL002283	[(2R,3S,4S,5R,6S)-6-[4-[(Z)-2-(3,5-dihydroxyphenyl)ethenyl]phenoxy]-3,4,5-trihydroxyoxan-2-yl]methyl 3,4,5-trihydroxybenzoate	542.53	2.35	8	12	2.69	-1.17	-2.41	0.73	0.4	——
DaH	MOL002284	PIT	244.26	2.75	4	4	72.29	0.64	0.01	0.13	0.47	4.38
DaH	MOL002285	1-O-Galloyl-glycerol	244.22	-0.17	5	7	63.21	-0.81	-1.71	0.1	0.34	5.5
DaH	MOL002286	laccaic acid D	300.23	1.61	4	7	2.06	-0.56	-1.44	0.31	0.46	——
DaH	MOL002287	Rheosmin	164.22	1.64	1	2	26.79	0.97	0.85	0.04	0.39	——
DaH	MOL002288	Emodin-1-O-beta-D-glucopyranoside	432.41	0.59	6	10	44.81	-1.12	-2	0.8	0.34	29.79
DaH	MOL002289	physcione	284.28	2.15	3	5	19.38	0.02	-0.96	0.27	0.38	——
DaH	MOL002290	Sennoside B	862.8	0.31	12	20	3.34	-3.85	-4.89	0.08	0.35	——
DaH	MOL002291	1-O-Galloylpedunculagin	936.68	3.07	15	26	38.09	-2.9	-4.09	0.04	0.41	6.47
DaH	MOL002292	Sennoside D	848.82	0.1	12	19	3.99	-3.48	-4.49	0.09	0.35	——
DaH	MOL002293	Sennoside D_qt	524.5	3.91	6	9	61.06	-0.7	-1.46	0.61	0.39	33.92
DaH	MOL002294	strumaroside	562.92	6.51	4	6	20.78	-0.23	-0.9	0.67	0.23	——
DaH	MOL002295	cinnamic acid	148.17	1.9	1	2	19.68	0.91	0.96	0.03	0.47	——
DaH	MOL002296	Daucosterol	548.89	5.93	4	6	20.18	0.09	-0.58	0.69	0.2	——
DaH	MOL002297	Daucosterol_qt	386.73	7.67	1	1	35.89	1.35	1.07	0.7	0.2	6.12
DaH	MOL002298	aloeemodin	272.27	0.5	3	5	20.65	-0.22	-0.85	0.24	0.4	——
DaH	MOL002299	DMR	134.1	-0.95	3	5	68.62	-1.09	-1.7	0.02	0.43	11.56
DaH	MOL002300	10beta-Hydroxy-6beta-isobutyrylfuranoeremophilane	320.47	3.9	1	4	16.94	0.88	0.7	0.29	0.24	——
DaH	MOL002301	DLA	90.09	-0.31	2	3	44.51	-0.21	-0.53	0.01	0.36	11.71
DaH	MOL002302	RHAPONTIN	406.42	1.26	6	9	9	-0.86	-1.74	0.55	0.36	——
DaH	MOL002303	palmidin A	510.52	4.52	6	8	32.45	-0.36	-1.47	0.65	0.4	32.14
DaH	MOL002304	Glycerite	1697.33	8.76	25	44	7.28	-4.71	-7.53	0.03	0.43	——
DaH	MOL002305	2,3-Digalloylglucose	484.4	-0.03	9	14	2.99	-2.25	-3.16	0.66	0.37	——
DaH	MOL000346	succinic acid	118.1	-0.41	2	4	29.62	-0.44	-0.71	0.01	0.42	——
DaH	MOL000358	beta-sitosterol	414.79	8.08	1	1	36.91	1.32	0.99	0.75	0.23	5.36
DaH	MOL000399	Docosanoate	340.66	9.11	1	2	15.69	1.21	0.91	0.26	0	——
DaH	MOL000471	aloe-emodin	270.25	1.67	3	5	83.38	-0.12	-1.07	0.24	0	31.49
DaH	MOL000472	emodin	270.25	2.49	3	5	24.4	0.22	-0.66	0.24	0	——
DaH	MOL000476	Physcion	284.28	2.74	2	5	22.29	0.52	-0.4	0.27	0	——
DaH	MOL000513	3,4,5-trihydroxybenzoic acid	170.13	0.63	4	5	31.69	-0.09	-0.54	0.04	0.41	11.78
DaH	MOL000554	gallic acid-3-O-(6'-O-galloyl)-glucoside	484.4	-0.03	9	14	30.25	-1.96	-2.76	0.67	0.36	2.48
DaH	MOL000096	(-)-catechin	290.29	1.92	5	6	49.68	-0.03	-0.78	0.24	0.35	0.38
DiH	MOL000012	Arachic acid	312.6	8.19	1	2	16.66	1.18	1.09	0.19	0.18	——
DiH	MOL000131	EIC	280.5	6.39	1	2	41.9	1.16	0.9	0.14	0.25	7.5
DiH	MOL001396	PENTADECYLIC ACID	242.45	5.91	1	2	20.18	1.08	0.88	0.08	0.18	——
DiH	MOL001436	leonuride	348.39	-3.07	6	9	2.6	-1.72	-2.95	0.33	0.21	——
DiH	MOL001501	Daturic acid	270.51	6.82	1	2	18.51	1.12	0.95	0.12	0.21	——
DiH	MOL003333	acteoside	624.65	0.38	9	15	2.94	-1.89	-2.97	0.62	0.33	——
DiH	MOL001709	methyl (2E,4E)-hexadeca-2,4-dienoate	266.47	6.15	0	2	41.57	1.37	1.23	0.12	0.21	5.84
DiH	MOL001739	zoomaric acid	254.46	5.92	1	2	35.78	1.18	0.88	0.1	0.24	5.29
DiH	MOL001768	Sumiki's acid	142.12	0.52	2	4	52.44	-0.21	-0.64	0.03	0.26	11.72
DiH	MOL001772	Dihydro-beta-ionone	194.35	3.24	0	1	26.25	1.35	1.61	0.05	0.27	——
DiH	MOL002321	Pca	129.13	-0.67	2	4	96.25	-0.2	-0.26	0.02	0.34	11.35
DiH	MOL002819	catalpol	362.37	-3.77	6	10	5.07	-1.72	-2.33	0.44	0.22	——
DiH	MOL002820	catapol_qt	200.21	-2.02	3	5	44.69	-0.63	-1.27	0.1	0.24	-0.09
DiH	MOL000003	MTL	182.2	-2.94	6	6	17.73	-1.58	-4.07	0.03	0.18	——
DiH	MOL000305	lauric acid	200.36	4.54	1	2	23.59	1.02	1.1	0.04	0	——
DiH	MOL003202	8-epi-Loganic acid	376.4	-2.33	6	10	4.43	-1.78	-2.64	0.4	0.25	——
DiH	MOL003331	Forsythiaside	624.65	0.38	9	15	3.05	-1.92	-2.95	0.61	0.35	——
DiH	MOL000346	succinic acid	118.1	-0.41	2	4	29.62	-0.44	-0.71	0.01	0.42	——
DiH	MOL000357	Sitogluside	576.95	6.34	4	6	20.63	-0.14	-0.93	0.62	0.23	——
DiH	MOL000359	sitosterol	414.79	8.08	1	1	36.91	1.32	0.87	0.75	0.22	5.37
DiH	MOL000360	FER	194.2	1.62	2	4	39.56	0.47	-0.03	0.06	0.34	2.38
DiH	MOL003688	2-(4-hydroxyphenyl)ethyl hexacosanoate	516.94	12.82	1	3	13.12	1.31	0.57	0.53	0	——
DiH	MOL003689	aeginetic acid	268.39	2.24	3	4	48.31	0.13	-0.23	0.13	0	5.12
DiH	MOL003690	Ajugol	348.39	-2.17	6	9	16.87	-1.03	-1.15	0.32	0	——
DiH	MOL003691	Ajugoside	390.43	-1.79	5	10	12.15	-1.03	-1.37	0.45	0	——
DiH	MOL003692	Ajugoside_qt	212.27	0.35	1	4	81.68	0.24	-0.13	0.08	0	10.07
DiH	MOL003694	Cerebrosid	266.29	-4.04	8	9	13.81	-2.69	-6.35	0.11	0	——
DiH	MOL003695	Cistanoside A	800.84	-1.11	11	20	3.4	-2.72	-4.08	0.33	0	——
DiH	MOL003696	Cistanoside F	488.49	-1.4	8	13	4.74	-2.11	-2.67	0.69	0	——
DiH	MOL003697	methyl 9,10-methylene-hexadecanoate	282.52	6.29	0	2	22.94	1.43	1.27	0.15	0	——
DiH	MOL003698	(2S,3R,4R,5S,6R)-2-[[(1S,4aS,5R,7aR)-4a,5-dihydroxy-7-methylol-5,7a-dihydro-1H-cyclopenta[c]pyran-1-yl]oxy]-6-methylol-tetrahydropyran-3,4,5-triol	362.37	-3.75	7	10	3.1	-2.12	-3.08	0.37	0	——
DiH	MOL003699	melittoside_qt	200.21	-2	4	5	40	-0.74	-1.23	0.08	0	0.37
DiH	MOL003700	Dihydrocatalpol	364.39	-3.38	6	10	3.58	-2.24	-4.7	0.44	0	——
DiH	MOL003701	geniposide	388.41	-2.98	6	10	3.78	-2.02	-2.75	0.44	0	——
DiH	MOL003702	geniposide_qt	226.25	-1.23	3	5	39.71	-0.92	-1.7	0.1	0	4.49
DiH	MOL003703	glutinoside	398.83	-2.78	6	10	21.33	-2.35	-5.98	0.52	0	——
DiH	MOL003704	Jiofuran	184.21	-0.53	3	4	54.91	-0.38	-0.88	0.06	0	-10.35
DiH	MOL003705	jioglutin A	250.7	-0.62	2	5	90.7	0	0	0.13	0	4.19
DiH	MOL003706	jioglutin B	250.7	-0.62	2	5	90.71	-0.01	-0.19	0.13	0	4.44
DiH	MOL003707	jioglutin C	232.26	-1.82	3	6	2.55	-0.54	-0.67	0.13	0	——
DiH	MOL003708	jioglutin D	246.29	-1.42	2	6	39.02	-0.22	-0.81	0.14	0	6.81
DiH	MOL003709	jioglutin E	232.31	-0.72	2	5	81.9	-0.04	-0.59	0.1	0	7.28
DiH	MOL003710	jioglutolide	186.23	-0.93	2	4	86.95	-0.15	-0.55	0.06	0	13.4
DiH	MOL003711	Jioglutoside A	346.37	-2.88	5	9	3.92	-1.82	-3.28	0.39	0	——
DiH	MOL003712	methyl (1S,4aS,7aS)-7-methylene-1-[(2S,3R,4S,5S,6R)-3,4,5-trihydroxy-6-[[(2R,3R,4R,5S,6R)-3,4,5-trihydroxy-6-methyl-tetrahydropyran-2-yl]oxymethyl]tetrahydropyran-2-yl]oxy-4a,5,6,7a-tetrahydro-1H-cyclopenta[d]pyran-4-carboxylate	518.57	-1.97	6	13	28.27	-1.55	-1.85	0.84	0	——
DiH	MOL003713	Jioglutoside B_qt	210.25	0.64	1	4	89.22	0.29	0.04	0.08	0	5.58
DiH	MOL003714	Jionoside A	800.84	-1.11	11	20	3.62	-2.92	-4.05	0.36	0	——
DiH	MOL003715	Jionoside B	814.87	-0.86	10	20	4.27	-2.53	-3.88	0.35	0	——
DiH	MOL003716	Melittoside	524.53	-5.5	10	15	19.2	-2.94	-3.8	0.8	0	——
DiH	MOL003717	METHYL PALMITOLEATE	268.49	6.17	0	2	34.61	1.38	1.32	0.12	0	5.54
DiH	MOL003718	6-O-p-coumaroylajugol	524.57	-0.84	6	12	26.13	-1.51	-2.04	0.85	0	——
DiH	MOL003719	methyl-2,6,10-trimethyltridecanoate	269.5	5.7	0	2	24.86	0.85	0.74	0.1	0.05	——
DiH	MOL003720	Purpureaside C	786.81	-1.36	12	20	3.14	-2.79	-3.88	0.38	0	——
DiH	MOL003721	Rehmaglutin B	236.67	-1.03	3	5	64.62	-0.55	-1.11	0.11	0	15.51
DiH	MOL003722	(3aS,4R,6aS)-4-hydroxy-6,6a-dimethylol-3a,4-dihydro-3H-cyclopenta[d]furan-2-one	200.21	-1.61	3	5	29.92	-1.1	-2.05	0.08	0	——
DiH	MOL003723	(2S,3R,4S,5S,6R)-2-[(1R,2R)-2-hydroxy-2-[(E,3S)-3-hydroxybut-1-enyl]-1,3,3-trimethylcyclohexoxy]-6-(hydroxymethyl)tetrahydropyran-3,4,5-triol	390.53	-0.25	6	8	8.43	-1.22	-2.17	0.33	0	——
DiH	MOL003724	(2S,3R,4S,5S,6R)-2-[(1R,2R)-2-hydroxy-2-[(E,3R)-3-hydroxybut-1-enyl]-1,3,3-trimethylcyclohexoxy]-6-(hydroxymethyl)tetrahydropyran-3,4,5-triol	390.53	-0.25	6	8	3.24	-1.21	-2.06	0.33	0	——
DiH	MOL003725	Rehmaionoside C	388.51	-0.44	5	8	12.89	-1.18	-1.42	0.34	0	——
DiH	MOL003726	rehmannioside B	524.53	-5.51	9	15	2.05	-3.18	-4.73	0.88	0	——
DiH	MOL003727	rehmannioside C	510.55	-4.82	9	14	10.23	-2.81	-4.43	0.86	0	——
DiH	MOL003728	6-O-p-hydroxybenzoylajugol	468.5	-1.3	6	11	4.53	-1.66	-2.09	0.81	0	——
DiH	MOL003729	(3R)-2,6,6-trimethyl-3-[(2R,3R,4S,5S,6R)-3,4,5-trihydroxy-6-(hydroxymethyl)oxan-2-yl]oxycyclohexene-1-carboxylic acid	346.42	-0.09	5	8	13.59	-1.28	-1.93	0.26	0	——
DiH	MOL003730	Rehmannioside A	524.53	-5.51	9	15	25.95	-3	-4.43	0.87	0	——
DiH	MOL003731	Rehmaglutin A	202.23	-1.63	3	5	29.7	-0.82	-1.25	0.1	0	——
DiH	MOL003732	Rehmaglutin D	220.67	-0.43	2	4	57.03	-0.17	-0.61	0.1	0	15.04
DiH	MOL003733	6-O-vanilloylajugol	484.5	-1.14	6	12	23.44	-1.26	-1.95	0.84	0	——
DiH	MOL003734	echinacoside	786.81	-1.36	12	20	3.14	-2.91	-4.05	0.38	0	——
DiH	MOL003735	aucubin	346.37	-3.1	6	9	4.17	-1.83	-2.9	0.33	0	——
DiH	MOL003736	Acetylcatalpol	402.44	-2.91	5	10	5.53	-1.57	-1.89	0.58	0	——
DiH	MOL000399	Docosanoate	340.66	9.11	1	2	15.69	1.21	0.91	0.26	0	——
DiH	MOL000414	Caffeate	180.17	1.37	3	4	54.97	0.27	0.11	0.05	0	1.63
DiH	MOL000449	Stigmasterol	412.77	7.64	1	1	43.83	1.44	1	0.76	0.22	5.57
DiH	MOL000732	Stachyose	666.66	-7.8	14	21	3.25	-5.54	-12.76	0.59	0.21	——
DiH	MOL000748	HMF	126.12	0.67	1	3	45.07	0.05	-0.27	0.02	0.22	11.73
DiH	MOL000841	raffinose	504.5	-6.06	11	16	11.79	-3.91	-8.77	0.66	0.21	——
DiH	MOL000842	sucrose	342.34	-4.31	8	11	7.17	-2.89	-6.67	0.23	0.2	——
MDP	MOL000095	delta 7-stigmastenol	416.81	8.33	1	1	25.32	1.31	0.98	0.75	0.21	——
MDP	MOL000098	quercetin	302.25	1.5	5	7	46.43	0.05	-0.77	0.28	0.38	14.4
MDP	MOL000103	PHB	138.13	1.17	2	3	30.15	0.39	0.21	0.03	0.45	11.77
MDP	MOL000114	vanillic acid	168.16	1.15	2	4	35.47	0.43	0.09	0.04	0.34	11.62
MDP	MOL000211	Mairin	456.78	6.52	2	3	55.38	0.73	0.22	0.78	0.26	8.87
MDP	MOL000219	BOX	121.12	0.76	0	2	31.55	0.54	0.84	0.02	0.11	12.07
MDP	MOL000223	caffeic acid	180.17	1.37	3	4	25.76	0.21	-0.26	0.05	0.44	——
MDP	MOL000254	eugenol	164.22	2.55	1	2	56.24	1.35	1.32	0.04	0.32	0.92
MDP	MOL000263	oleanolic acid	456.78	6.42	2	3	29.02	0.59	0.07	0.76	0.25	——
MDP	MOL000359	sitosterol	414.79	8.08	1	1	36.91	1.32	0.87	0.75	0.22	5.37
MDP	MOL000422	kaempferol	286.25	1.77	4	6	41.88	0.26	-0.55	0.24	0	14.74
MDP	MOL000492	(+)-catechin	290.29	1.92	5	6	54.83	-0.03	-0.73	0.24	0	0.61
MDP	MOL000513	3,4,5-trihydroxybenzoic acid	170.13	0.63	4	5	31.69	-0.09	-0.54	0.04	0.41	11.78
MDP	MOL000675	oleic acid	282.52	6.84	1	2	33.13	1.17	0.78	0.14	0.2	4.99
MDP	MOL000719	methyl salicylate	152.16	1.42	1	3	42.55	1.05	1.1	0.03	0.36	-2.17
MDP	MOL000874	paeonol	166.19	1.29	1	3	28.79	0.93	0.84	0.04	0.32	——
MDP	MOL001246	(1R)-()-Nopinone	138.23	1.52	0	1	57.86	1.23	1.6	0.05	0.28	11.1
MDP	MOL001551	Trochol	442.8	6.31	2	2	15.48	0.84	0.35	0.78	0.24	——
MDP	MOL001692	beta-D-Apiose	150.15	-2.17	4	5	118.53	-1.46	-3.61	0.03	0.24	11.16
MDP	MOL001915	paeonoside	610.57	-2.22	10	16	3.47	-2.71	-3.73	0.71	0.29	——
MDP	MOL001925	paeoniflorin_qt	318.35	0.46	2	6	68.18	-0.34	-0.73	0.4	0.39	8.81
MDP	MOL002046	hexanoic acid	116.18	1.81	1	2	73.08	0.8	0.93	0.01	0.27	10.81
MDP	MOL002095	DEP	222.26	2.24	0	4	52.19	0.72	0.57	0.07	0.38	5.37
MDP	MOL002215	Oleanic acid	440.78	7.52	1	2	8.41	1.14	0.97	0.77	0.25	——
MDP	MOL002786	Apocynin	166.19	1.29	1	3	31.71	0.74	0.52	0.04	0.33	24.75
MDP	MOL003867	Paeonolide	460.48	-1.85	6	12	6.3	-1.42	-2.09	0.64	0.3	——
MDP	MOL003881	6-Hydroxycoumarin	162.15	1.63	1	3	15.8	0.73	0.47	0.05	0.43	——
MDP	MOL005090	oxypaeoniflorin_qt	334.35	0.2	3	7	19.4	-0.77	-1.28	0.44	0.39	——
MDP	MOL006869	WLN: QR CQ DV1	152.16	1.03	2	3	36.49	0.67	0.46	0.03	0.4	25.1
MDP	MOL007002	paeonioflorin	480.51	-1.28	5	11	10.22	-1.69	-2.39	0.79	0.33	——
MDP	MOL007003	benzoyl paeoniflorin	584.62	0.76	4	12	31.14	-1.35	-2.08	0.54	0.4	15.66
MDP	MOL007006	oxypaeoniflorin	496.51	-1.55	6	12	12.98	-1.91	-2.7	0.78	0.34	——
MDP	MOL007364	apiopaeonoside	460.48	-2.03	6	12	16.73	-1.79	-2.48	0.64	0.29	——
MDP	MOL007365	galloyl-oxypaeoniflorin	648.62	-0.31	8	16	3.2	-2.18	-3.08	0.39	0.38	——
MDP	MOL007366	galloyl-oxypaeoniflorin_qt 2	334.35	0.2	3	7	26.21	-0.54	-0.97	0.44	0.39	——
MDP	MOL007367	paeonoside	328.35	-0.62	4	8	18.52	-0.86	-1.04	0.24	0.28	——
MDP	MOL007368	4-O-methylpaeoniflorin	494.54	-0.87	4	11	25.71	-1.27	-1.7	0.78	0.3	——
MDP	MOL007369	4-O-methylpaeoniflorin_qt	332.38	0.87	1	6	67.24	0.15	-0.15	0.43	0.34	9.51
MDP	MOL007370	6-o-vanillyoxypaeoniflorin	648.67	-0.01	6	15	10.91	-1.58	-2.56	0.54	0.3	——
MDP	MOL007371	6-o-vanillyoxypaeoniflorin_qt 2	336.37	-0.03	3	7	17.71	-0.61	-1.19	0.37	0.32	——
MDP	MOL007372	3-Hydroxy-4-methoxyacetophenone	166.19	1.29	1	3	22.32	0.85	0.66	0.04	0.33	——
MDP	MOL007373	1-(2,3-dihydroxy-4-methoxyphenyl)ethanone	182.19	1.02	2	4	32.96	0.81	0.63	0.05	0.3	15.23
MDP	MOL007374	5-[[5-(4-methoxyphenyl)-2-furyl]methylene]barbituric acid	312.3	2.05	2	7	43.44	0.09	-0.7	0.3	0.29	2.59
MDP	MOL007375	beta-sitosterol-beta-d-glucoside	578.97	6.59	4	6	19.58	-0.17	-0.83	0.62	0.22	——
MDP	MOL007376	beta-sitosterol-beta-d-glucoside_qt	416.81	8.33	1	1	25.32	1.28	0.99	0.75	0.21	——
MDP	MOL007377	mudanoside A	342.33	-1	5	9	13.39	-1.42	-1.67	0.29	0.37	——
MDP	MOL007378	3-acetyl-4-hydroxybenzoic acid	180.17	0.91	2	4	37.58	-0.04	-0.17	0.05	0.43	24.85
MDP	MOL007379	3-[(2S,3R,4S,5S,6R)-6-[[(2R,3R,4R)-3,4-dihydroxy-4-(hydroxymethyl)oxolan-2-yl]oxymethyl]-3,4,5-trihydroxyoxan-2-yl]oxy-4,5-dihydroxybenzoic acid	464.42	-2.68	9	14	5.6	-2.54	-3.07	0.63	0.29	——
MDP	MOL007380	mudanpinoic,acid,a	454.76	5.85	2	3	13.86	0.6	-0.03	0.65	0.26	——
MDP	MOL007381	mudanpioside-h	618.64	0	6	14	6.77	-1.63	-2.6	0.61	0.33	——
MDP	MOL007382	mudanpioside-h_qt 2	336.37	-0.03	3	7	42.36	-0.39	-0.96	0.37	0.32	7.6
MDP	MOL007383	paeonidanin	492.57	-0.83	4	10	24.64	-1.28	-1.71	0.78	0.3	——
MDP	MOL007384	paeonidanin_qt	330.41	0.92	1	5	65.31	-0.09	-0.59	0.35	0.35	7.1
MDP	MOL007385	octadecyl (E)-3-(3,4-dihydroxyphenyl)prop-2-enoate	432.71	9.33	2	4	3.18	0.98	0.6	0.55	0.24	——
MDP	MOL009092	Pentagalloylglucose	940.72	3.69	15	26	3.01	-3.08	-4.17	0.21	0.45	——
SQ	MOL001300	PEL	122.18	1.55	1	1	44.03	1.11	1.13	0.02	0.37	-2.41
SQ	MOL001304	2-ACETYLPYRROLE	109.14	0.96	1	1	58.37	1.16	1.42	0.01	0.12	17.58
SQ	MOL001388	(+)-Ledol	222.41	3.2	1	1	16.96	1.43	1.69	0.12	0.21	——
SQ	MOL001393	myristic acid	228.42	5.46	1	2	21.18	1.07	0.99	0.07	0.19	——
SQ	MOL001394	Oktadekan	254.56	8.58	0	0	9.81	1.83	1.83	0.09	0.14	——
SQ	MOL001494	Mandenol	308.56	6.99	0	2	42	1.46	1.14	0.19	0.25	5.39
SQ	MOL001501	Daturic acid	270.51	6.82	1	2	18.51	1.12	0.95	0.12	0.21	——
SQ	MOL001578	Hypnon	120.16	1.57	0	1	48.19	1.36	1.54	0.02	0.45	25.2
SQ	MOL000169	alpha-Guaiene	204.39	4.99	0	0	25.93	1.81	2.09	0.07	0.26	——
SQ	MOL001739	zoomaric acid	254.46	5.92	1	2	35.78	1.18	0.88	0.1	0.24	5.29
SQ	MOL001792	DFV	256.27	2.57	2	4	32.76	0.51	-0.29	0.18	0.42	17.89
SQ	MOL001862	Cadalin	198.33	4.91	0	0	12.96	1.95	1.93	0.08	0.38	——
SQ	MOL001863	METHYL ISOPALMITATE	270.51	6.41	0	2	9.42	1.38	1.23	0.11	0.16	——
SQ	MOL001899	ZINC02169908	268.54	6.2	0	1	23.3	1.42	1.24	0.1	0.23	——
SQ	MOL002046	hexanoic acid	116.18	1.81	1	2	73.08	0.8	0.93	0.01	0.27	10.81
SQ	MOL002153	1H-Cycloprop(e)azulen-7-ol, decahydro-1,1,7-trimethyl-4-methylene-, (1aR-(1aalpha,4aalpha,7beta,7abeta,7balpha))-	220.39	3.01	1	1	82.33	1.37	1.49	0.12	0.28	12.04
SQ	MOL002379	PTL	86.15	1.4	0	1	59.53	1.21	1.52	0	0	11.32
SQ	MOL000252	farnesol	222.41	4.76	1	1	28.44	1.32	1.07	0.06	0.28	——
SQ	MOL002526	3691-11-0	204.39	4.99	0	0	23.66	1.86	2.05	0.07	0.25	——
SQ	MOL000263	oleanolic acid	456.78	6.42	2	3	29.02	0.59	0.07	0.76	0.25	——
SQ	MOL002675	Hexenal	98.16	1.83	0	1	46.01	1.29	1.66	0.01	0.31	11.37
SQ	MOL002817	Picein	298.32	-0.6	4	7	9.48	-0.88	-1.32	0.19	0.34	——
SQ	MOL002818	Piceol	136.16	1.3	1	2	36.8	0.87	0.72	0.03	0.44	25.06
SQ	MOL002850	butylated hydroxytoluene	220.39	4.85	1	1	40.02	1.75	1.8	0.07	0.3	10.36
SQ	MOL002879	Diop	390.62	7.44	0	4	43.59	0.79	0.26	0.39	0.28	3.6
SQ	MOL000303	caprylic acid	144.24	2.72	1	2	16.4	0.9	1.02	0.02	0	——
SQ	MOL000305	lauric acid	200.36	4.54	1	2	23.59	1.02	1.1	0.04	0	——
SQ	MOL003393	(1S,4S)-7-isopropylidene-1,4-dimethyl-2,3,4,5,6,8-hexahydro-1H-azulene	204.39	5.13	0	0	24.38	1.86	2.07	0.07	0.23	——
SQ	MOL000357	Sitogluside	576.95	6.34	4	6	20.63	-0.14	-0.93	0.62	0.23	——
SQ	MOL000358	beta-sitosterol	414.79	8.08	1	1	36.91	1.32	0.99	0.75	0.23	5.36
SQ	MOL000384	DL-Glucuronic acid	194.16	-2.47	5	7	3.35	-1.91	-4.72	0.04	0	——
SQ	MOL004102	2-Coumarate	164.17	1.64	2	3	53.6	0.48	0.28	0.04	0	7.49
SQ	MOL004119	5-METHYLFURFURAL	110.12	1.13	0	2	43.92	1.07	1.48	0.01	0.16	11.9
SQ	MOL004464	MEHQ	124.15	1.55	1	2	43.98	1.27	1.33	0.02	0.32	11.69
SQ	MOL000449	Stigmasterol	412.77	7.64	1	1	43.83	1.44	1	0.76	0.22	5.57
SQ	MOL004687	2-octanone	128.24	2.25	0	1	19.29	1.35	1.57	0.01	0.25	——
SQ	MOL000485	TMH	136.26	2.87	0	0	46.25	1.82	2.18	0.05	0	11.42
SQ	MOL005284	(3S,5R,6S,8R,9R,10R,12R,13R,14R,17S)-17-[(2S)-2-hydroxy-6-methylhept-5-en-2-yl]-4,4,8,10,14-pentamethyl-2,3,5,6,7,9,11,12,13,15,16,17-dodecahydro-1H-cyclopenta[a]phenanthrene-3,6,12-triol	476.82	4.62	4	4	20.13	0.01	-0.82	0.78	0.25	——
SQ	MOL005319	Ditertbutyl phthalate	278.38	3.4	0	4	43.67	1.13	1.13	0.13	0.33	-1.91
SQ	MOL005334	(3S,5R,8R,9R,10R,12R,13R,14R,17S)-17-[(2S)-2-hydroxy-6-methylhept-5-en-2-yl]-4,4,8,10,14-pentamethyl-2,3,5,6,7,9,11,12,13,15,16,17-dodecahydro-1H-cyclopenta[a]phenanthrene-3,12-diol	460.82	5.79	3	3	29.69	0.37	-0.52	0.77	0.24	——
SQ	MOL005337	(2S,3R,4S,5S,6R)-2-[(2S)-2-[(3S,5R,8R,9R,10R,12R,13R,14R,17S)-3-[(2R,3R,4S,5S,6R)-4,5-dihydroxy-6-(hydroxymethyl)-3-[(2S,3R,4S,5S,6R)-3,4,5-trihydroxy-6-(hydroxymethyl)oxan-2-yl]oxyoxan-2-yl]oxy-12-hydroxy-4,4,8,10,14-pentamethyl-2,3,5,6,7,9,11,12,13,15,1	947.3	0.55	12	18	5.5	-3.17	-4.47	0.09	0.24	——
SQ	MOL005338	Ginsenoside Re	947.3	0.27	12	18	4.27	-3.2	-4.39	0.12	0.25	——
SQ	MOL005340	(3S,5R,6S,8R,9R,10R,12R,13R,14R,17S)-17-[(2R)-2-hydroxy-6-methylhept-5-en-2-yl]-4,4,8,10,14-pentamethyl-2,3,5,6,7,9,11,12,13,15,16,17-dodecahydro-1H-cyclopenta[a]phenanthrene-3,6,12-triol	476.82	4.62	4	4	20.13	0.21	-0.43	0.78	0.24	——
SQ	MOL005341	Sanchinoside C1	801.14	1.13	10	14	10.04	-2.27	-3.5	0.28	0.24	——
SQ	MOL005344	ginsenoside rh2	622.98	4.04	6	8	36.32	-0.51	-1.38	0.56	0.24	11.08
SQ	MOL000908	beta-elemene	204.39	4.79	0	0	25.63	1.84	2.07	0.06	0.33	——
SQ	MOL005538	Linolenyl alcohol	264.5	6.02	1	1	42.79	1.39	0.97	0.12	0.22	6.77
SQ	MOL005843	1-Hydroxycumene	136.21	1.81	1	1	59.97	1.27	1.36	0.03	0	11.54
SQ	MOL000612	(-)-alpha-cedrene	204.39	4.12	0	0	55.56	1.81	2.16	0.1	0.24	4.82
SQ	MOL000066	alloaromadedrene	204.39	4.22	0	0	53.46	1.83	2.1	0.1	0	12.51
SQ	MOL000666	hexanal	100.18	1.85	0	1	55.71	1.25	1.52	0.01	0.23	10.96
SQ	MOL006728	Gypenoside XIV_qt	460.82	5.79	3	3	29.69	0.33	-0.49	0.77	0.26	——
SQ	MOL000675	oleic acid	282.52	6.84	1	2	33.13	1.17	0.78	0.14	0.2	4.99
SQ	MOL000069	palmitic acid	256.48	6.37	1	2	19.3	1.09	1	0.1	0	——
SQ	MOL000705	WLN: VH6	114.21	2.31	0	1	19.59	1.29	1.49	0.01	0.23	——
SQ	MOL000711	2,4-Heptdienal	110.17	1.84	0	1	19.14	1.29	1.54	0.01	0.38	——
SQ	MOL007459	[(1R)-1-methoxyethyl]benzene	136.21	2.01	0	1	42.09	1.6	1.89	0.02	0.3	-2.07
SQ	MOL007460	Cyclooctadiene	108.2	2.76	0	0	42.82	1.81	2.2	0.01	0.27	11.38
SQ	MOL007461	1,2-DIHYDRO-1,5,8-TRIMETHYLNAPHTHALENE	172.29	4.12	0	0	47.69	1.91	2.13	0.06	0.35	11.65
SQ	MOL007462	1,4,6-trimethyl-1,2,3,4-tetralin	174.31	4.33	0	0	45.15	1.89	2.14	0.06	0.3	4.17
SQ	MOL007463	(1R,2S)-1-ethyl-2-methylcyclopropane	84.18	2.33	0	0	39.6	1.79	2.22	0.01	0.26	11.32
SQ	MOL007464	1-methyl-5-isopropenyl cyclohexene	136.26	3.5	0	0	48.12	1.83	2.02	0.02	0.29	11.53
SQ	MOL007465	10-Methylnonadecane	282.62	9.29	0	0	10.28	1.84	1.79	0.12	0.16	——
SQ	MOL007466	DICHLOROANILINE	162.02	2.41	2	1	44.51	1.18	1.08	0.02	0.58	12.24
SQ	MOL007467	2,6-dimethyl-cyclohexanol	128.24	2.14	1	1	76.28	1.21	1.4	0.02	0.21	10.95
SQ	MOL007468	3,5-Dimethoxyacetophenone	180.22	1.54	0	3	27.61	0.95	0.6	0.04	0.27	——
SQ	MOL007469	3,4-dichloroaniline	161.03	2.51	0	0	9.92	1.89	2.24	0.02	0.65	——
SQ	MOL007470	(2E)-3-ethylpenta-2,4-dien-1-ol	112.19	1.63	1	1	27.13	1.06	1.13	0.01	0.34	——
SQ	MOL007471	Octadecyne	250.52	8.77	0	0	4.66	1.94	2.11	0.09	0.23	——
SQ	MOL007472	(9Z,12E)-octadeca-9,12-dienoic acid methyl ester	294.53	6.64	0	2	41.93	1.43	1.1	0.17	0.19	5.87
SQ	MOL007473	N3-Oxalyl-L-2,3-diaminopropanoate	176.15	-2.01	5	7	72.93	-1.4	-1.75	0.04	0.42	4.69
SQ	MOL007474	(2R,3S,4S,5R,6S)-2-(hydroxymethyl)-6-[(2S)-6-methyl-2-[(3S,5R,6S,8R,9R,10R,12R,13R,14R,17S)-3,6,12-trihydroxy-4,4,8,10,14-pentamethyl-2,3,5,6,7,9,11,12,13,15,16,17-dodecahydro-1H-cyclopenta[a]phenanthren-17-yl]hept-5-en-2-yl]oxyoxane-3,4,5-triol	638.98	2.87	7	9	4.05	-1.2	-2.12	0.6	0.22	——
SQ	MOL007475	ginsenoside f2	785.14	2.3	9	13	36.43	-1.8	-3.03	0.25	0.22	13.11
SQ	MOL007476	ginsenoside rb1	1109.46	-1.2	15	23	6.29	-3.72	-4.95	0.04	0.23	——
SQ	MOL007477	(2S,3R,4S,5S,6R)-2-[(2S)-2-[(3S,5R,8R,9R,10R,12R,13R,14R,17S)-3-[(2R,3R,4S,5S,6R)-4,5-dihydroxy-6-(hydroxymethyl)-3-[(2S,3R,4S,5S,6R)-3,4,5-trihydroxy-6-(hydroxymethyl)oxan-2-yl]oxyoxan-2-yl]oxy-12-hydroxy-4,4,8,10,14-pentamethyl-2,3,5,6,7,9,11,12,13,15,1	1079.43	-0.69	14	22	6.02	-3.46	-4.89	0.04	0.24	——
SQ	MOL007478	ginsenoside rb3	1079.43	-0.69	14	22	7.84	-3.98	-5.24	0.04	0.23	——
SQ	MOL007479	ginsenoside rc	1079.43	-0.69	14	22	8.13	-3.86	-5.22	0.04	0.23	——
SQ	MOL007480	ginsenoside rd_qt	460.82	5.79	3	3	12.23	0.65	-0.01	0.77	0.24	——
SQ	MOL007481	ginsenoside rf	801.14	1.13	10	14	15.33	-2.12	-3.13	0.24	0.24	——
SQ	MOL007482	(2S,3R,4R,5R,6S)-2-[[(2R,3R,4S,5S,6R)-2-[[(3S,5R,6S,8R,9R,10R,12R,13R,14R,17S)-3,12-dihydroxy-17-[(1S)-1-hydroxy-1,5-dimethylhex-4-enyl]-4,4,8,10,14-pentamethyl-2,3,5,6,7,9,11,12,13,15,16,17-dodecahydro-1H-cyclopenta[a]phenanthren-6-yl]oxy]-4,5-dihydroxy-	785.14	2.02	9	13	10.09	-1.81	-2.65	0.26	0.22	——
SQ	MOL007483	ginsenoside rg3	1079.43	-0.69	14	22	5.95	-4.05	-5.56	0.04	0.24	——
SQ	MOL007484	(2R,3R,4S,5S,6R)-2-[[(3S,5R,6S,8R,9R,10R,12R,13R,14R,17S)-3,12-dihydroxy-17-[(2S)-2-hydroxy-6-methylhept-5-en-2-yl]-4,4,8,10,14-pentamethyl-2,3,5,6,7,9,11,12,13,15,16,17-dodecahydro-1H-cyclopenta[a]phenanthren-6-yl]oxy]-6-(hydroxymethyl)oxane-3,4,5-triol	638.98	2.87	7	9	16.91	-1.13	-2.11	0.57	0.24	——
SQ	MOL007485	(2S,3S,4S,5R,6R)-6-[[(3S,4aR,6aR,6bS,8aS,12aS,14aR,14bR)-4,4,6a,6b,11,11,14b-heptamethyl-8a-[oxo-[[(2S,3R,4S,5S,6R)-3,4,5-trihydroxy-6-(hydroxymethyl)-2-tetrahydropyranyl]oxy]methyl]-1,2,3,4a,5,6,7,8,9,10,12,12a,14,14a-tetradecahydropicen-3-yl]oxy]-3,4-di	957.24	1.23	11	19	1.95	-2.96	-4.1	0.05	0.25	——
SQ	MOL007486	ZINC01532096	284.15	3.25	0	3	50.74	0.89	0.55	0.15	0.59	0.47
SQ	MOL007487	notoginsenosider1	933.27	-0.11	12	18	5.43	-3.01	-4.15	0.13	0.22	——
SQ	MOL007488	notoginsenosider2	771.11	1.64	9	13	7.69	-1.94	-2.8	0.28	0.22	——
SQ	MOL007489	notoginsenosider3	1109.46	-1.2	15	23	3.01	-4.28	-5.64	0.04	0.22	——
SQ	MOL007490	notoginsenosider3_qt	460.82	5.79	3	3	13.83	0.42	-0.33	0.77	0.25	——
SQ	MOL007491	notoginsenosider4	1241.59	-2.43	17	27	7.35	-4.52	-5.95	0.02	0.24	——
SQ	MOL007492	Butylcyclobutane	112.24	3.45	0	0	47.59	1.79	2.15	0.01	0.2	-3.54
SQ	MOL007493	(1S,4S,4aS,6S,8aS)-4-isopropyl-1,6-dimethyldecahydronaphthalene	208.43	5.25	0	0	23.29	1.76	2.02	0.08	0.21	——
SQ	MOL007494	gypenosideix	917.27	1.06	11	17	8.82	-2.68	-4.15	0.11	0.26	——
SQ	MOL007495	gypenosidexvii	947.3	0.55	12	18	4.86	-3.07	-4.51	0.1	0.25	——
SQ	MOL007496	isopulegone	154.23	0.99	0	2	55.39	0.66	0.81	0.03	0.33	11.25
SQ	MOL007497	NaPst	120.21	3.02	0	0	46.93	1.85	2.1	0.02	0.37	11.63
SQ	MOL007498	10Z,13Z-nonadecadienoic acid	294.53	6.85	1	2	40.98	1.18	0.87	0.17	0.24	5.31
SQ	MOL013377	Lutein	568.96	9.47	2	2	22.59	1.14	-0.99	0.55	0.33	——
SQ	MOL007500	panaxatriol	476.82	4.29	3	4	15.42	0.52	-0.07	0.79	0.22	——
SQ	MOL007501	panaxydol	260.41	4.69	1	2	61.67	1.07	0.11	0.13	0.32	4.45
SQ	MOL007502	NSC692928	244.41	5.68	1	1	43.31	1.44	0.66	0.1	0.35	6.66
SQ	MOL007503	panaxytriol	278.43	3.92	3	3	33.76	0.05	-0.98	0.13	0.32	3.59
SQ	MOL007504	NSC 308879	460.82	5.46	2	3	17.14	0.88	0.38	0.8	0.22	——
SQ	MOL007505	WLN: QR DG	128.56	2.23	1	1	60.44	1.57	1.75	0.01	0.57	12.16
SQ	MOL007506	protopanoxadiol	446.79	5.58	3	3	21.14	0.42	-0.29	0.78	0.24	——
SQ	MOL007507	sanchinan-a	1447.42	-15.98	28	45	7.57	-8.82	-14.19	0.03	0.23	——
SQ	MOL007508	α-cyperene	204.39	4.32	0	0	51.1	1.82	2.1	0.11	0.23	12.57
SQ	MOL007509	(4aS,9aR)-2,9,9-trimethyl-5-methylene-4,4a,6,7,8,9a-hexahydro-3H-benzo[7]annulene	204.39	4.75	0	0	22.74	1.82	2.08	0.08	0.24	——
SQ	MOL007510	α-copaene	206.41	4.95	0	0	37.81	1.83	2.04	0.08	0.22	3.78
SQ	MOL007511	(5S)-5-ethyloxolan-2-one	114.16	1.18	0	2	75.69	1.12	1.4	0.01	0.28	11.08
SQ	MOL000860	stearic acid	284.54	7.28	1	2	17.83	1.15	1.22	0.14	0.19	——
SQ	MOL000864	MYS	212.47	7.22	0	0	13.98	1.81	1.92	0.05	0.15	——
SQ	MOL000867	Heptadekan	240.53	8.13	0	0	8.64	1.84	1.87	0.07	0.14	——
SQ	MOL000869	Henicosane	296.65	9.95	0	0	8.41	1.84	1.8	0.15	0.13	——
SQ	MOL000879	methyl palmitate	270.51	6.62	0	2	18.09	1.37	1.18	0.12	0.14	——
SQ	MOL000905	()-beta-Pinene	136.26	2.93	0	0	44.77	1.85	2.29	0.05	0.28	11.32
SQ	MOL003127	Germacrene D	204.39	5.14	0	0	19.22	1.83	2.02	0.06	0	——
SQ	MOL000935	Hepanal	204.39	4.36	0	0	53.83	1.86	2.17	0.1	0.24	11.92
SQ	MOL000971	Ethylpalmitate	284.54	6.97	0	2	18.99	1.41	1.15	0.14	0.16	——
SQ	MOL000098	quercetin	302.25	1.5	5	7	46.43	0.05	-0.77	0.28	0.38	14.4
SCP	MOL000010	Rhoifolin	578.57	-0.43	8	14	6.68	-1.87	-2.98	0.77	0.29	——
SCP	MOL000105	protocatechuic acid	154.13	0.9	3	4	25.37	0.1	-0.17	0.04	0.43	——
SCP	MOL000114	vanillic acid	168.16	1.15	2	4	35.47	0.43	0.09	0.04	0.34	11.62
SCP	MOL000117	Cymol	134.24	3.51	0	0	27.2	1.86	2.1	0.02	0.34	——
SCP	MOL002085	alpha-Cubebene	204.39	4.17	0	0	16.73	1.83	2.1	0.11	0.25	——
SCP	MOL001179	(&#8722;)-Alloaromadendrene	204.39	4.22	0	0	54.04	1.81	2.07	0.1	0.23	12.06
SCP	MOL000119	ZINC02040970	222.41	4.56	1	1	40.43	1.44	1.31	0.06	0.3	4.73
SCP	MOL000130	CAM	152.26	1.94	0	1	67.17	1.29	1.71	0.05	0.27	11.34
SCP	MOL001335	WLN: Q1R	108.15	1.23	1	1	58.68	1.08	1.27	0.01	0.38	11.87
SCP	MOL001393	myristic acid	228.42	5.46	1	2	21.18	1.07	0.99	0.07	0.19	——
SCP	MOL001509	ZINC01081275	192.33	3.02	0	1	43.92	1.35	1.51	0.05	0.32	9.16
SCP	MOL001566	calarene	204.39	4.12	0	0	52.16	1.82	2.04	0.11	0.23	-1.34
SCP	MOL001599	α-cubebol	208.38	3.28	1	1	64.81	1.32	1.43	0.09	0.26	7.24
SCP	MOL000166	ZINC01609418	222.41	4.31	1	1	21.62	1.41	1.37	0.07	0.26	——
SCP	MOL001660	p-MCA	178.2	1.89	1	3	31	0.75	0.47	0.05	0.38	5.23
SCP	MOL000171	Guaiol	222.41	3.91	1	1	38.77	1.36	1.47	0.09	0.22	6.2
SCP	MOL000019	D-Camphene	136.26	2.93	0	0	34.98	1.81	2.19	0.04	0	11.29
SCP	MOL000193	(Z)-caryophyllene	204.39	4.75	0	0	30.29	1.82	2.15	0.09	0.28	8
SCP	MOL001944	Marmesin	246.28	2.03	1	4	50.28	0.52	0.07	0.18	0.3	-0.09
SCP	MOL001945	Majudin	216.2	2.19	0	4	42.21	0.94	0.69	0.13	0.21	-3.6
SCP	MOL000197	Myrcene	136.26	3.69	0	0	24.96	1.84	1.98	0.02	0.37	——
SCP	MOL000198	(R)-linalool	154.28	2.74	1	1	39.8	1.33	1.36	0.02	0.32	6.48
SCP	MOL002003	(-)-Caryophyllene oxide	220.39	3.52	0	1	32.67	1.58	1.76	0.13	0.28	6.51
SCP	MOL002006	Isocembrol	290.54	6.01	1	1	15.06	1.39	1.24	0.17	0.25	——
SCP	MOL002042	thymol	150.24	3.24	1	1	41.47	1.6	1.68	0.03	0.33	11.33
SCP	MOL000207	Methyleugenol	178.25	2.81	0	2	73.36	1.47	1.41	0.04	0.27	2.92
SCP	MOL002095	DEP	222.26	2.24	0	4	52.19	0.72	0.57	0.07	0.38	5.37
SCP	MOL002124	beta-asarone	208.28	2.74	0	3	35.61	1.45	1.24	0.06	0.15	4.46
SCP	MOL000223	caffeic acid	180.17	1.37	3	4	25.76	0.21	-0.26	0.05	0.44	——
SCP	MOL002335	beta-Gurjunene	204.39	4.22	0	0	51.36	1.81	2.07	0.1	0.26	12.07
SCP	MOL002361	Terragon	148.22	2.82	0	1	36.59	1.72	1.83	0.03	0.34	1.79
SCP	MOL000024	alpha-humulene	204.39	5.04	0	0	22.98	1.88	2.08	0.06	0	——
SCP	MOL000257	(-)-beta-Phellandrene	136.26	3.31	0	0	40.44	1.83	2.1	0.02	0.31	10.91
SCP	MOL000265	ISOELEMICIN	208.28	2.74	0	3	46.72	1.43	1.26	0.06	0.21	3.46
SCP	MOL000266	beta-Cubebene	204.39	4.22	0	0	32.81	1.83	2.02	0.11	0.25	6.59
SCP	MOL000268	(1S,5S)-1-isopropyl-4-methylenebicyclo[3.1.0]hexane	136.26	2.93	0	0	46.21	1.83	2.18	0.04	0.31	11.47
SCP	MOL000269	Elemicin	208.28	2.79	0	3	21.94	1.41	1.28	0.06	0.2	——
SCP	MOL002693	nicotiflorin	594.57	-1.18	9	15	3.64	-1.77	-2.55	0.73	0.3	——
SCP	MOL000029	beta-Humulene	204.39	5.09	0	0	26.87	1.82	2.01	0.06	0	——
SCP	MOL002955	2'-O-Methylisoliquiritigenin	270.3	3.15	2	4	75.86	0.55	-0.16	0.17	0.4	18.38
SCP	MOL000003	MTL	182.2	-2.94	6	6	17.73	-1.58	-4.07	0.03	0.18	——
SCP	MOL003032	BZM	212.26	3.27	0	2	18.64	1.36	1.18	0.09	0.47	——
SCP	MOL003047	[(1S)-endo]-(-)-Borneol	154.28	1.98	1	1	83.54	1.22	1.43	0.05	0.25	11.33
SCP	MOL003126	alpha cadinene	204.39	4.75	0	0	18.73	1.85	2.05	0.08	0	——
SCP	MOL003171	2,5-Dimethoxybenzoquinone	168.16	-0.59	0	4	8.72	0.47	-0.04	0.04	0.19	——
SCP	MOL000333	Veraguensin	372.5	4.31	0	5	25.53	1.15	0.72	0.39	0.19	——
SCP	MOL000035	beta-Selinene	204.39	4.81	0	0	24.39	1.83	2.12	0.08	0	——
SCP	MOL003521	Isohomogenol	178.25	2.75	0	2	32.61	1.49	1.33	0.04	0.28	2.73
SCP	MOL003534	CADINENE	204.39	4.75	0	0	17.12	1.88	2.06	0.08	0.25	——
SCP	MOL003538	()-Ledene	204.39	4.36	0	0	51.84	1.86	2.16	0.1	0.23	11.79
SCP	MOL003539	(E)-2-propenoic acid,3-(3-hydroxy-2,6,6-trimethyl-1-cyclohexen-1-yl),methyl ester	224.33	2.38	1	3	30.7	0.56	0.3	0.08	0	4.61
SCP	MOL003540	(1R)-Camphor-10-sulfonic acid	232.33	0.42	1	4	42.61	0.09	0	0.09	0	11.57
SCP	MOL003541	()-alpha-Longipinene	204.39	4.12	0	0	57.47	1.81	2.05	0.12	0	12.13
SCP	MOL003542	8-Isopentenyl-kaempferol	354.38	3.63	4	6	38.04	0.53	-0.49	0.39	0	15.37
SCP	MOL003543	Aminacrin	194.25	2.61	2	2	35	0.91	0.33	0.12	0	6.81
SCP	MOL003544	Acoramone	224.28	1.41	0	4	63.43	0.88	0.93	0.07	0	3.49
SCP	MOL003545	aristolene	204.39	4.12	0	0	52.2	1.81	2.08	0.11	0	-1.3
SCP	MOL003546	Aristolone	218.37	3.19	0	1	45.31	1.29	1.54	0.13	0	1.93
SCP	MOL003547	Azaron	208.28	2.74	0	3	38.39	1.42	1.18	0.06	0	4.55
SCP	MOL003548	Asatone	448.56	0.91	0	8	12.53	0.43	0.16	0.52	0	——
SCP	MOL003549	gamma-Asarone	208.28	2.79	0	3	22.76	1.5	1.33	0.06	0	——
SCP	MOL003550	WLN: G1R	126.59	2.43	0	0	73.8	1.86	2.02	0.01	0	12.03
SCP	MOL003551	Bisasarcin	416.56	4.8	0	6	18.55	1.07	0.54	0.5	0	——
SCP	MOL003552	Cyclite	171.04	2.58	0	0	9.13	1.84	1.96	0.01	0	——
SCP	MOL003553	Calamendiol	236.39	2.51	2	2	61.13	0.79	0.67	0.11	0	8.78
SCP	MOL003554	Gazarin	196.22	1.54	0	4	74.63	0.92	0.65	0.06	0	6.33
SCP	MOL003555	Methyl isoeugenol	178.25	2.75	0	2	74.21	1.48	1.48	0.04	0	3.25
SCP	MOL003556	δ-cadinene	204.39	4.94	0	0	20.29	1.83	2.1	0.08	0	——
SCP	MOL003557	()-Valencene	204.39	4.75	0	0	37.63	1.83	2.08	0.08	0	7.72
SCP	MOL003558	Asaronic acid	212.22	1.39	1	5	61.92	0.84	0.56	0.07	0	5.91
SCP	MOL003559	gramenone	220.39	4.02	0	1	16.36	1.5	1.68	0.09	0	——
SCP	MOL000356	lupeol	426.8	7.4	1	1	12.12	1.46	1.29	0.78	0.24	——
SCP	MOL003560	Isocalamendiol	238.41	2.69	2	2	57.63	0.94	0.74	0.11	0	7.86
SCP	MOL003561	isopimpinellin	246.23	2.17	0	5	25.93	0.94	0.5	0.17	0	——
SCP	MOL004958	Isoschaftoside	564.54	-1.94	10	14	17.38	-2.62	-3.36	0.83	0	——
SCP	MOL003563	Isoshyobunone	220.39	4.19	0	1	23.48	1.32	1.53	0.07	0	——
SCP	MOL003564	(E)-3-(2,4-dimethylphenyl)acrylic acid	176.23	2.88	1	2	37.86	1.03	0.88	0.05	0	6.03
SCP	MOL003565	longicyclene	204.39	3.55	0	0	46.07	1.81	2.16	0.15	0	13.63
SCP	MOL003566	Murolan-3,9(11)-diene-10-peroxy	236.39	3.99	1	2	36.72	1.14	1.04	0.11	0	6.63
SCP	MOL003567	Diethylbenzylamine	163.29	2.6	0	1	43.05	1.63	1.99	0.03	0	4.02
SCP	MOL003568	Patchoulene	204.39	4.32	0	0	49.06	1.82	2.17	0.11	0	14.1
SCP	MOL003569	3,5,8-trihydroxy-2-(4-hydroxyphenyl)-7-[(2S,3R,4R,5R,6S)-3,4,5-trihydroxy-6-methyl-tetrahydropyran-2-yl]oxy-chromone	448.41	0.49	7	11	21.69	-0.98	-2.03	0.75	0	——
SCP	MOL003570	Epishyobunone	220.39	3.84	0	1	42.37	1.4	1.59	0.07	0	8.84
SCP	MOL003571	spathulenol	220.39	3.01	1	1	81.61	1.4	1.55	0.12	0	12.03
SCP	MOL003572	ZINC01849758	222.41	4.31	1	1	16.77	1.38	1.3	0.07	0	——
SCP	MOL003573	calacorene	200.35	4.79	0	0	16.2	1.89	1.99	0.08	0	——
SCP	MOL003574	α-gurjunene	204.39	4.36	0	0	52.57	1.83	2.1	0.1	0	12.19
SCP	MOL003575	α-Panasinsene	204.39	4.08	0	0	56.77	1.83	2.11	0.12	0	0.57
SCP	MOL003576	(1R,3aS,4R,6aS)-1,4-bis(3,4-dimethoxyphenyl)-1,3,3a,4,6,6a-hexahydrofuro[4,3-c]furan	386.48	2.64	0	6	52.35	0.83	0.05	0.62	0	2.29
SCP	MOL003577	Bisasaricin	416.56	4.8	0	6	28.94	1.04	0.65	0.5	0	——
SCP	MOL003578	Cycloartenol	426.8	7.55	1	1	38.69	1.53	1.33	0.78	0	5
SCP	MOL003579	Anizol	108.15	1.81	0	1	19.88	1.68	1.94	0.01	0	——
SCP	MOL000422	kaempferol	286.25	1.77	4	6	41.88	0.26	-0.55	0.24	0	14.74
SCP	MOL000472	emodin	270.25	2.49	3	5	24.4	0.22	-0.66	0.24	0	——
SCP	MOL000473	(-)-trans-Carveol	152.26	2.4	1	1	45.28	1.18	1.41	0.03	0	11.83
SCP	MOL000561	Astragalin	448.41	-0.32	7	11	14.03	-1.34	-1.97	0.74	0.34	——
SCP	MOL000608	()-Terpinen-4-ol	154.28	2.55	1	1	81.41	1.36	1.66	0.03	0.25	10.81
SCP	MOL000612	(-)-alpha-cedrene	204.39	4.12	0	0	55.56	1.81	2.16	0.1	0.24	4.82
SCP	MOL000069	palmitic acid	256.48	6.37	1	2	19.3	1.09	1	0.1	0	——
SCP	MOL000708	WLN: VHR	106.13	1.59	0	1	32.63	1.32	1.66	0.01	0.44	12.07
SCP	MOL000748	HMF	126.12	0.67	1	3	45.07	0.05	-0.27	0.02	0.22	11.73
SCP	MOL000771	p-coumaric acid	164.17	1.64	2	3	43.29	0.46	0.13	0.04	0.45	4.43
SCP	MOL000008	apigenin	270.25	2.33	3	5	23.06	0.43	-0.61	0.21	0.41	——
SCP	MOL000884	Azulen	128.18	2.74	0	0	29.16	1.85	2.01	0.03	0.5	——
SCP	MOL000904	cineole	154.28	2.16	0	1	59.96	1.55	1.94	0.05	0.21	11.28
DL	——	Xanthine	——	——	——	——	——	——	——	——	——	——
DL	——	Guanidine	——	——	——	——	——	——	——	——	——	——
DL	——	Guanosine	——	——	——	——	——	——	——	——	——	——
DL	——	Cholesteryl Ferulate	——	——	——	——	——	——	——	——	——	——
DL	——	Xanthinin	——	——	——	——	——	——	——	——	——	——
DL	——	4-Guanidino-1-Butanol	——	——	——	——	——	——	——	——	——	——
DL	——	Hyrcanoside	——	——	——	——	——	——	——	——	——	——
DL	——	Cholesterol	——	——	——	——	——	——	——	——	——	——
SNJ	——	Arginine	——	——	——	——	——	——	——	——	——	——
SNJ	——	Aspartic Acid	——	——	——	——	——	——	——	——	——	——
SNJ	——	Alanine	——	——	——	——	——	——	——	——	——	——
SNJ	——	4-Guanidino-1-Butanol	——	——	——	——	——	——	——	——	——	——
SNJ	——	Guanidine	——	——	——	——	——	——	——	——	——	——
SNJ	——	Cholesterol	——	——	——	——	——	——	——	——	——	——
