# Supplementary material for: Synergistic Network Pharmacology for Traditional Chinese Medicine Liangxue Tongyu Formula in Acute Intracerebral Hemorrhagic Stroke
Source: Neural Plast. 2021 Feb 26;2021:8874296. doi: 10.1155/2021/8874296 (PMC7936909; doi:10.1155/2021/8874296)
Supplement: Supplementary Materials — S1 Table. 517 compounds of 8 herbs in LXTYF collected from TCMSP and BATMAN-TCM database. S2 Table. 874 targets of the active ingredients obtained from the TCMSP. S3 Table. 149 targets of active components predicted from the SwissTargetPrediction database. S4 Table. 2315 targets relating to ICH collected from GAD, Genecards, and DisGeNET database. S5 Table. Topological parameters of component-target network. S6 Table. Proteins-proteins interaction information of LXTYF targets for AICH in STRING 11.0. S7 Table. Topological parameters of the PPI network. S8 Table. Results of putative targets for KEGG pathway enrichment analysis. S9 Table. Detailed information of 583 differentially expressed mRNAs identified between MGT and MG. S10 Table. Details of the Herb-Compound-Target-Pathway(H-C-T-P) network connection verified in RNA-seq. [file 8874296.f1.zip › Supplementary Table S1-S10/S2 and S3 Table.xlsx]

## Sheet: Table S2 收集 表格整理
Table S2. Targets Obtained through TCMSP database
Herb	Molecule name	Target name	Symbol	Uniprot
CS	ellagic acid	Transcription factor p65	RELA	Q04206
CS	ellagic acid	Cyclin-dependent kinase inhibitor 1	CDKN1A	P38936
CS	ellagic acid	Matrix metalloproteinase-9	MMP9	P14780
CS	ellagic acid	NF-kappa-B inhibitor alpha	CHUK	O15111
CS	ellagic acid	Interleukin-8	CXCL8	P10145
CS	ellagic acid	Protein kinase C beta type	PRKCB	P05771
CS	ellagic acid	Insulin-like growth factor II	IGF2	P01344
CS	ellagic acid	Chitin synthase 2	CHS2	P30599
CS	paeoniflorin	Monocyte differentiation antigen CD14	CD14	P08571
CS	paeoniflorin	Lipopolysaccharide-binding protein	LBP	P18428
CS	baicalein	Dipeptidyl peptidase IV	DPP4	P27487
CS	baicalein	Transcription factor p65	RELA	Q04206
CS	baicalein	RAC-alpha serine/threonine-protein kinase	AKT1	P31749
CS	baicalein	Proto-oncogene c-Fos	FOS	P01100
CS	baicalein	Apoptosis regulator BAX	BAX	Q07812
CS	baicalein	Matrix metalloproteinase-9	MMP9	P14780
CS	baicalein	Caspase-3	CASP3	P42574
CS	baicalein	Hypoxia-inducible factor 1-alpha	HIF1A	Q16665
CS	baicalein	Fos-related antigen 1	FOSL1	P15407
CS	baicalein	Fos-related antigen 2	FOSL2	P15408
CS	baicalein	G2/mitotic-specific cyclin-B1	CCNB1	P14635
CS	baicalein	Insulin-like growth factor II	IGF2	P01344
CS	baicalein	Arachidonate 12-lipoxygenase, 12S-type	ALOX12	P18054
CS	baicalein	Nuclear factor of activated T-cells, cytoplasmic 1	NFATC1	O95644
CS	baicalein	Tudor domain-containing protein 7	TDRD7	Q8NHU6
CS	baicalein	NADPH oxidase 5	NOX5	Q96PH1
CS	baicalein	Fatty acid-binding protein, epidermal	FABP5	Q01469
CS	baicalein	Apolipoprotein D	APOD	P05090
CS	ellagic acid	Vascular endothelial growth factor A	VEGFA	P15692
CS	baicalein	Vascular endothelial growth factor A	VEGFA	P15692
CS	baicalein	Cellular tumor antigen p53	TP53	P04637
CS	paeoniflorin	Tumor necrosis factor	TNF	P01375
CS	Baicalin	mRNA of Protein-tyrosine phosphatase, non-receptor type 1	PTPN1	P18031
CS	baicalein	Prostaglandin G/H synthase 2	PTGS2	P35354
CS	(2R,3R)-4-methoxyl-distylin	Prostaglandin G/H synthase 2	PTGS2	P35354
CS	baicalein	Prostaglandin G/H synthase 1	PTGS1	P23219
CS	(2R,3R)-4-methoxyl-distylin	Prostaglandin G/H synthase 1	PTGS1	P23219
CS	baicalein	Trypsin-1	PRSS1	P07477
CS	baicalein	Phosphatidylinositol-4,5-bisphosphate 3-kinase catalytic subunit, gamma isoform	PIK3CG	P48736
CS	ellagic acid	Progesterone receptor	PGR	P06401
CS	campest-5-en-3beta-ol	Progesterone receptor	PGR	P06401
CS	stigmast-7-en-3-ol	Progesterone receptor	PGR	P06401
CS	Spinasterol	Progesterone receptor	PGR	P06401
CS	baicalein	CGMP-inhibited 3',5'-cyclic phosphodiesterase A	PDE3A	Q14432
CS	Spinasterol	Mineralocorticoid receptor	NR3C2	P08235
CS	(2R,3R)-4-methoxyl-distylin	Nitric oxide synthase, inducible	NOS2	P35228
CS	baicalein	Nuclear receptor coactivator 2	NCOA2	Q15596
CS	Ethyl oleate (NF)	Nuclear receptor coactivator 2	NCOA2	Q15596
CS	Spinasterol	Nuclear receptor coactivator 2	NCOA2	Q15596
CS	baicalein	Nuclear receptor coactivator 1	NCOA1	Q15788
CS	baicalein	Myeloperoxidase	MPO	P05164
CS	ellagic acid	72 kDa type IV collagenase	MMP2	P08253
CS	paeoniflorin	Interleukin-6	IL6	P05231
CS	ellagic acid	Heat shock protein HSP 90	HSP90AB1	P08238
CS	baicalein	Heat shock protein HSP 90	HSP90AB1	P08238
CS	(2R,3R)-4-methoxyl-distylin	Heat shock protein HSP 90	HSP90AB1	P08238
CS	ellagic acid	Glutathione S-transferase P	GSTP1	P09211
CS	ellagic acid	Glutathione S-transferase Mu 2	GSTM2	P28161
CS	ellagic acid	Glutathione S-transferase Mu 1	GSTM1	P09488
CS	ellagic acid	Glutathione S-transferase A2	GSTA2	P09210
CS	ellagic acid	Glutathione S-transferase A1	GSTA1	P08263
CS	paeoniflorgenone	Gamma-aminobutyric acid receptor subunit alpha-1	GABRA1	P14867
CS	Baicalin	Coagulation factor Xa	F10	P00742
CS	ellagic acid	Estrogen receptor	ESR1	P03372
CS	(2R,3R)-4-methoxyl-distylin	Estrogen receptor	ESR1	P03372
CS	baicalein	Egl nine homolog 1	EGLN1	Q9GZT9
CS	baicalein	Cytochrome c	CYCS	P99999
CS	baicalein	Cell division control protein 2 homolog	CRK2	Q9CAL3
CS	ellagic acid	Cell division protein kinase 2	CDK2	P24941
CS	baicalein	Calmodulin	CALM1	P0DP23
CS	baicalein	Apoptosis regulator Bcl-2	BCL2	P10415
CS	ellagic acid	Androgen receptor	AR	P10275
CS	baicalein	Androgen receptor	AR	P10275
CS	baicalein	Aryl hydrocarbon receptor	AHR	P35869
CS	baicalein	mRNA of PKA Catalytic Subunit C-alpha	PRKACA	P17612
CS,DaH,SQ	beta-sitosterol	Dopamine D1 receptor	DRD1	P21728
CS,DaH,SQ	beta-sitosterol	Apoptosis regulator BAX	BAX	Q07812
CS,DaH,SQ	beta-sitosterol	Caspase-9	CASP9	P55211
CS,DaH,SQ	beta-sitosterol	Caspase-3	CASP3	P42574
CS,DaH,SQ	beta-sitosterol	Caspase-8	CASP8	Q14790
CS,DaH,SQ	beta-sitosterol	Protein kinase C alpha type	PRKCA	P17252
CS,DaH,SQ	beta-sitosterol	Transforming growth factor beta-1	TGFB1	P01137
CS,DaH,SQ	beta-sitosterol	Gamma-aminobutyric-acid receptor alpha-5 subunit	GABRA5	P31644
CS,DaH,SQ	beta-sitosterol	Cytochrome P450-cam	camC	P00183
CS,DaH,SQ	beta-sitosterol	Sodium-dependent serotonin transporter	SLC6A4	P31645
CS,DaH,SQ	beta-sitosterol	Sodium channel protein type 5 subunit alpha	SCN5A	Q14524
CS,DaH,SQ	beta-sitosterol	Prostaglandin G/H synthase 2	PTGS2	P35354
CS,DaH,SQ	beta-sitosterol	Prostaglandin G/H synthase 1	PTGS1	P23219
CS,DaH,SQ	beta-sitosterol	Serum paraoxonase/arylesterase 1	PON1	P27169
CS,DaH,SQ	beta-sitosterol	Phosphatidylinositol-4,5-bisphosphate 3-kinase catalytic subunit, gamma isoform	PIK3CG	P48736
CS,DaH,SQ	beta-sitosterol	Progesterone receptor	PGR	P06401
CS,DaH,SQ	beta-sitosterol	CGMP-inhibited 3',5'-cyclic phosphodiesterase A	PDE3A	Q14432
CS,DaH,SQ	beta-sitosterol	Mu-type opioid receptor	OPRM1	P35372
CS,DaH,SQ	beta-sitosterol	Nuclear receptor coactivator 2	NCOA2	Q15596
CS,DaH,SQ	beta-sitosterol	Gamma-aminobutyric-acid receptor alpha-3 subunit	MPI	P34949
CS,DaH,SQ	beta-sitosterol	Microtubule-associated protein 2	MAP2	P11137
CS,DaH,SQ	beta-sitosterol	Potassium voltage-gated channel subfamily H member 2	KCNH2	Q12809
CS,DaH,SQ	beta-sitosterol	Transcription factor AP-1	JUN	P05412
CS,DaH,SQ	beta-sitosterol	5-hydroxytryptamine 2A receptor	HTR7	P34969
CS,DaH,SQ	beta-sitosterol	Heat shock protein HSP 90	HSP90AB1	P08238
CS,DaH,SQ	beta-sitosterol	Gamma-aminobutyric acid receptor subunit alpha-1	GABRA1	P14867
CS,DaH,SQ	beta-sitosterol	Neuronal acetylcholine receptor protein, alpha-7 chain	CHRNA7	P36544
CS,DaH,SQ	beta-sitosterol	Neuronal acetylcholine receptor subunit alpha-2	CHRNA2	Q15822
CS,DaH,SQ	beta-sitosterol	Muscarinic acetylcholine receptor M4	CHRM4	P08173
CS,DaH,SQ	beta-sitosterol	Muscarinic acetylcholine receptor M3	CHRM3	P20309
CS,DaH,SQ	beta-sitosterol	Muscarinic acetylcholine receptor M2	CHRM2	P08172
CS,DaH,SQ	beta-sitosterol	Muscarinic acetylcholine receptor M1	CHRM1	P11229
CS,DaH,SQ	beta-sitosterol	Apoptosis regulator Bcl-2	BCL2	P10415
CS,DaH,SQ	beta-sitosterol	Gamma-aminobutyric-acid receptor alpha-2 subunit	GABRA2	P47869
CS,DaH,SQ	beta-sitosterol	Beta-2 adrenergic receptor	ADRB2	P07550
CS,DaH,SQ	beta-sitosterol	Alpha-1B adrenergic receptor	ADRA1B	P35368
CS,DaH,SQ	beta-sitosterol	Alpha-1A adrenergic receptor	ADRA1A	P35348
CS,DaH,SQ	beta-sitosterol	mRNA of PKA Catalytic Subunit C-alpha	PRKACA	P17612
CS,DiH,MDP	sitosterol	Progesterone receptor	PGR	P06401
CS,DiH,MDP	sitosterol	Mineralocorticoid receptor	NR3C2	P08235
CS,DiH,MDP	sitosterol	Nuclear receptor coactivator 2	NCOA2	Q15596
CS,DiH,SQ	Stigmasterol	Sodium-dependent dopamine transporter	SLC6A3	Q01959
CS,DiH,SQ	Stigmasterol	Sodium-dependent noradrenaline transporter	SLC6A2	P23975
CS,DiH,SQ	Stigmasterol	Sodium channel protein type 5 subunit alpha	SCN5A	Q14524
CS,DiH,SQ	Stigmasterol	Retinoic acid receptor RXR-alpha	RXRA	P19793
CS,DiH,SQ	Stigmasterol	Prostaglandin G/H synthase 2	PTGS2	P35354
CS,DiH,SQ	Stigmasterol	Prostaglandin G/H synthase 1	PTGS1	P23219
CS,DiH,SQ	Stigmasterol	Urokinase-type plasminogen activator	PLAU	P00749
CS,DiH,SQ	Stigmasterol	Progesterone receptor	PGR	P06401
CS,DiH,SQ	Stigmasterol	Mineralocorticoid receptor	NR3C2	P08235
CS,DiH,SQ	Stigmasterol	Nuclear receptor coactivator 2	NCOA2	Q15596
CS,DiH,SQ	Stigmasterol	Nuclear receptor coactivator 1	NCOA1	Q15788
CS,DiH,SQ	Stigmasterol	Gamma-aminobutyric-acid receptor alpha-3 subunit	MPI	P34949
CS,DiH,SQ	Stigmasterol	Amine oxidase [flavin-containing] B	MAOB	P27338
CS,DiH,SQ	Stigmasterol	Amine oxidase [flavin-containing] A	MAOA	P21397
CS,DiH,SQ	Stigmasterol	Leukotriene A-4 hydrolase	LTA4H	P09960
CS,DiH,SQ	Stigmasterol	Ig gamma-1 chain C region	IGHG1	P01857
CS,DiH,SQ	Stigmasterol	5-hydroxytryptamine 2A receptor	HTR7	P34969
CS,DiH,SQ	Stigmasterol	Gamma-aminobutyric acid receptor subunit alpha-1	GABRA1	P14867
CS,DiH,SQ	Stigmasterol	Chymotrypsinogen B	CTRB1	P17538
CS,DiH,SQ	Stigmasterol	Neuronal acetylcholine receptor protein, alpha-7 chain	CHRNA7	P36544
CS,DiH,SQ	Stigmasterol	Muscarinic acetylcholine receptor M3	CHRM3	P20309
CS,DiH,SQ	Stigmasterol	Muscarinic acetylcholine receptor M2	CHRM2	P08172
CS,DiH,SQ	Stigmasterol	Muscarinic acetylcholine receptor M1	CHRM1	P11229
CS,DiH,SQ	Stigmasterol	Aldose reductase	AKR1B1	P15121
CS,DiH,SQ	Stigmasterol	Beta-2 adrenergic receptor	ADRB2	P07550
CS,DiH,SQ	Stigmasterol	Beta-1 adrenergic receptor	ADRB1	P08588
CS,DiH,SQ	Stigmasterol	Alpha-2A adrenergic receptor	ADRA2A	P08913
CS,DiH,SQ	Stigmasterol	Alpha-1B adrenergic receptor	ADRA1B	P35368
CS,DiH,SQ	Stigmasterol	Alpha-1A adrenergic receptor	ADRA1A	P35348
CS,DiH,SQ	Stigmasterol	Alcohol dehydrogenase 1C	ADH1C	P00326
CS,DiH,SQ	Stigmasterol	mRNA of PKA Catalytic Subunit C-alpha	PRKACA	P17612
CS,MDP	(+)-catechin	Hyaluronan synthase 2	HAS2	Q92819
CS,MDP	paeonol	Transcription factor p65	RELA	Q04206
CS,MDP	paeonol	RAC-alpha serine/threonine-protein kinase	AKT1	P31749
CS,MDP	paeonol	Apoptosis regulator BAX	BAX	Q07812
CS,MDP	paeonol	Activator of 90 kDa heat shock protein ATPase homolog 1	AHSA1	O95433
CS,MDP	paeonol	NF-kappa-B inhibitor alpha	CHUK	O15111
CS,MDP	paeonol	Intercellular adhesion molecule 1	ICAM1	P05362
CS,MDP	paeonol	Tyrosinase	TYR	P14679
CS,MDP	paeonol	Phosphatidylinositol-3,4,5-trisphosphate 3-phosphatase and dual-specificity protein phosphatase PTEN	PTEN	P60484
CS,MDP	paeonol	Tumor necrosis factor	TNF	P01375
CS,MDP	paeonol	Sodium-dependent dopamine transporter	SLC6A3	Q01959
CS,MDP	paeonol	Sodium-dependent noradrenaline transporter	SLC6A2	P23975
CS,MDP	(+)-catechin	Retinoic acid receptor RXR-alpha	RXRA	P19793
CS,MDP	(+)-catechin	Prostaglandin G/H synthase 2	PTGS2	P35354
CS,MDP	paeonol	Prostaglandin G/H synthase 2	PTGS2	P35354
CS,MDP	(+)-catechin	Prostaglandin G/H synthase 1	PTGS1	P23219
CS,MDP	paeonol	Prostaglandin G/H synthase 1	PTGS1	P23219
CS,MDP	(+)-catechin	Nuclear receptor coactivator 2	NCOA2	Q15596
CS,MDP	paeonol	Mitogen-activated protein kinase 1	MAPK1	P28482
CS,MDP	paeonol	Amine oxidase [flavin-containing] B	MAOB	P27338
CS,MDP	paeonol	Amine oxidase [flavin-containing] A	MAOA	P21397
CS,MDP	(+)-catechin	Catalase	CAT	P04040
CS,MDP	paeonol	Interleukin-2	IL2	P60568
CS,MDP	(+)-catechin	Heat shock protein HSP 90	HSP90AB1	P08238
CS,MDP	(+)-catechin	Beta-lactamase	LACTB2	Q53H82
CS,MDP	paeonol	Beta-lactamase	LACTB2	Q53H82
CS,MDP	(+)-catechin	Estrogen receptor	ESR1	P03372
CS,MDP	paeonol	Chymotrypsinogen B	CTRB1	P17538
CS,MDP	paeonol	Muscarinic acetylcholine receptor M2	CHRM2	P08172
CS,MDP	paeonol	Muscarinic acetylcholine receptor M1	CHRM1	P11229
CS,MDP	(+)-catechin	Calmodulin	CALM1	P0DP23
CS,MDP	paeonol	Apoptosis regulator Bcl-2	BCL2	P10415
CS,MDP	paeonol	Beta-2 adrenergic receptor	ADRB2	P07550
CS,MDP	paeonol	Beta-1 adrenergic receptor	ADRB1	P08588
CS,MDP	paeonol	Alpha-2C adrenergic receptor	ADRA2C	P18825
CS,MDP	paeonol	Alpha-2B adrenergic receptor	ADRA2B	P18089
CS,MDP	paeonol	Alpha-2A adrenergic receptor	ADRA2A	P08913
CS,MDP	paeonol	Alpha-1D adrenergic receptor	ADRA1D	P25100
CS,MDP	paeonol	Alpha-1B adrenergic receptor	ADRA1B	P35368
CS,MDP	paeonol	Alpha-1A adrenergic receptor	ADRA1A	P35348
CS,MDP	(+)-catechin	mRNA of PKA Catalytic Subunit C-alpha	PRKACA	P17612
DaH	(-)-catechin	Peroxisome proliferator-activated receptor gamma	PPARG	P37231
DaH	(-)-catechin	Krueppel-like factor 7	KLF7	O75840
DaH	aloe-emodin	Cyclin-dependent kinase inhibitor 1	CDKN1A	P38936
DaH	aloe-emodin	Eukaryotic translation initiation factor 6	EIF6	P56537
DaH	aloe-emodin	Apoptosis regulator BAX	BAX	Q07812
DaH	aloe-emodin	Caspase-3	CASP3	P42574
DaH	aloe-emodin	Protein kinase C alpha type	PRKCA	P17252
DaH	aloe-emodin	Protein kinase C epsilon type	PRKCE	Q02156
DaH	aloe-emodin	Proliferating cell nuclear antigen	PCNA	P12004
DaH	aloe-emodin	Myc proto-oncogene protein	MYC	P01106
DaH	aloe-emodin	Protein kinase C delta type	PRKCD	Q05655
DaH	aloe-emodin	G2/mitotic-specific cyclin-B1	CCNB1	P14635
DaH	EUPATIN	DNA topoisomerase II	TOP2A	P11388
DaH	EUPATIN	Dipeptidyl peptidase IV	DPP4	P27487
DaH	Physciondiglucoside	DNA topoisomerase II	TOP2A	P11388
DaH	Torachrysone-8-O-beta-D-(6'-oxayl)-glucoside	DNA topoisomerase II	TOP2A	P11388
DaH	emodin	DNA topoisomerase II	TOP2A	P11388
DaH	emodin	Cyclin-dependent kinase inhibitor 1	CDKN1A	P38936
DaH	emodin	Matrix metalloproteinase-9	MMP9	P14780
DaH	emodin	Caspase-3	CASP3	P42574
DaH	emodin	Protein kinase C epsilon type	PRKCE	Q02156
DaH	emodin	Peroxisome proliferator-activated receptor gamma	PPARG	P37231
DaH	emodin	Myc proto-oncogene protein	MYC	P01106
DaH	emodin	Cytochrome P450 1A1	CYP1A1	P04798
DaH	emodin	Protein kinase C delta type	PRKCD	Q05655
DaH	emodin	Granulocyte-macrophage colony-stimulating factor	CSF2	P04141
DaH	emodin	Transforming growth factor beta-1	TGFB1	P01137
DaH	emodin	Actin, aortic smooth muscle	ACTA2	P62736
DaH	emodin	Solute carrier family 2, facilitated glucose transporter member 4	SLC2A4	P14672
DaH	emodin	Solute carrier family 2, facilitated glucose transporter member 1	SLC2A1	P11166
DaH	Physcion	DNA topoisomerase II	TOP2A	P11388
DaH	aloe-emodin	Cellular tumor antigen p53	TP53	P04637
DaH	emodin	Cellular tumor antigen p53	TP53	P04637
DaH	aloe-emodin	Tumor necrosis factor	TNF	P01375
DaH	emodin	Tumor necrosis factor	TNF	P01375
DaH	EUPATIN	Sodium channel protein type 5 subunit alpha	SCN5A	Q14524
DaH	Crysophanol	Sodium channel protein type 5 subunit alpha	SCN5A	Q14524
DaH	Physcion	Sodium channel protein type 5 subunit alpha	SCN5A	Q14524
DaH	Physcion	Retinoic acid receptor RXR-alpha	RXRA	P19793
DaH	(-)-catechin	Prostaglandin G/H synthase 2	PTGS2	P35354
DaH	aloe-emodin	Prostaglandin G/H synthase 2	PTGS2	P35354
DaH	EUPATIN	Prostaglandin G/H synthase 2	PTGS2	P35354
DaH	rhein	Prostaglandin G/H synthase 2	PTGS2	P35354
DaH	Toralactone	Prostaglandin G/H synthase 2	PTGS2	P35354
DaH	emodin	Prostaglandin G/H synthase 2	PTGS2	P35354
DaH	Crysophanol	Prostaglandin G/H synthase 2	PTGS2	P35354
DaH	Physcion	Prostaglandin G/H synthase 2	PTGS2	P35354
DaH	(-)-catechin	Prostaglandin G/H synthase 1	PTGS1	P23219
DaH	aloe-emodin	Prostaglandin G/H synthase 1	PTGS1	P23219
DaH	rhein	Prostaglandin G/H synthase 1	PTGS1	P23219
DaH	Toralactone	Prostaglandin G/H synthase 1	PTGS1	P23219
DaH	emodin	Prostaglandin G/H synthase 1	PTGS1	P23219
DaH	Crysophanol	Prostaglandin G/H synthase 1	PTGS1	P23219
DaH	Physcion	Prostaglandin G/H synthase 1	PTGS1	P23219
DaH	EUPATIN	Trypsin-1	PRSS1	P07477
DaH	EUPATIN	Peroxisome proliferator activated receptor delta	PPARD	Q03181
DaH	aloe-emodin	cAMP-dependent protein kinase inhibitor alpha	PKIA	P61925
DaH	Crysophanol	cAMP-dependent protein kinase inhibitor alpha	PKIA	P61925
DaH	Physcion	cAMP-dependent protein kinase inhibitor alpha	PKIA	P61925
DaH	aloe-emodin	Phosphatidylinositol-4,5-bisphosphate 3-kinase catalytic subunit, gamma isoform	PIK3CG	P48736
DaH	rhein	Phosphatidylinositol-4,5-bisphosphate 3-kinase catalytic subunit, gamma isoform	PIK3CG	P48736
DaH	Toralactone	Phosphatidylinositol-4,5-bisphosphate 3-kinase catalytic subunit, gamma isoform	PIK3CG	P48736
DaH	emodin	Phosphatidylinositol-4,5-bisphosphate 3-kinase catalytic subunit, gamma isoform	PIK3CG	P48736
DaH	Crysophanol	Phosphatidylinositol-4,5-bisphosphate 3-kinase catalytic subunit, gamma isoform	PIK3CG	P48736
DaH	Physcion	Phosphatidylinositol-4,5-bisphosphate 3-kinase catalytic subunit, gamma isoform	PIK3CG	P48736
DaH	Daucosterol_qt	Progesterone receptor	PGR	P06401
DaH	Crysophanol	CGMP-inhibited 3',5'-cyclic phosphodiesterase A	PDE3A	Q14432
DaH	Physcion	Nitric-oxide synthase, endothelial	NOS3	P29474
DaH	EUPATIN	Nitric oxide synthase, inducible	NOS2	P35228
DaH	Toralactone	Nitric oxide synthase, inducible	NOS2	P35228
DaH	(-)-catechin	Nuclear receptor coactivator 2	NCOA2	Q15596
DaH	aloe-emodin	Nuclear receptor coactivator 2	NCOA2	Q15596
DaH	EUPATIN	Nuclear receptor coactivator 2	NCOA2	Q15596
DaH	rhein	Nuclear receptor coactivator 2	NCOA2	Q15596
DaH	Daucosterol_qt	Nuclear receptor coactivator 2	NCOA2	Q15596
DaH	emodin	Nuclear receptor coactivator 2	NCOA2	Q15596
DaH	Crysophanol	Nuclear receptor coactivator 2	NCOA2	Q15596
DaH	Physcion	Nuclear receptor coactivator 2	NCOA2	Q15596
DaH	emodin	Nuclear receptor coactivator 1	NCOA1	Q15788
DaH	Physcion	Nuclear receptor coactivator 1	NCOA1	Q15788
DaH	emodin	Interstitial collagenase	MMP1	P03956
DaH	emodin	Amine oxidase [flavin-containing] B	MAOB	P27338
DaH	EUPATIN	Vascular endothelial growth factor receptor 2	KDR	P35968
DaH	emodin	Vascular endothelial growth factor receptor 2	KDR	P35968
DaH	rhein	Transcription factor AP-1	JUN	P05412
DaH	aloe-emodin	Interleukin-1 beta	IL1B	P01584
DaH	emodin	Interleukin-1 beta	IL1B	P01584
DaH	aloe-emodin	Ig gamma-1 chain C region	IGHG1	P01857
DaH	emodin	Ig gamma-1 chain C region	IGHG1	P01857
DaH	Crysophanol	Ig gamma-1 chain C region	IGHG1	P01857
DaH	Physcion	Ig gamma-1 chain C region	IGHG1	P01857
DaH	(-)-catechin	Heat shock protein HSP 90	HSP90AB1	P08238
DaH	aloe-emodin	Heat shock protein HSP 90	HSP90AB1	P08238
DaH	EUPATIN	Heat shock protein HSP 90	HSP90AB1	P08238
DaH	rhein	Heat shock protein HSP 90	HSP90AB1	P08238
DaH	Toralactone	Heat shock protein HSP 90	HSP90AB1	P08238
DaH	emodin	Heat shock protein HSP 90	HSP90AB1	P08238
DaH	Crysophanol	Heat shock protein HSP 90	HSP90AB1	P08238
DaH	Physcion	Heat shock protein HSP 90	HSP90AB1	P08238
DaH	Crysophanol	Gamma-aminobutyric acid receptor subunit alpha-1	GABRA1	P14867
DaH	(-)-catechin	Beta-lactamase	LACTB2	Q53H82
DaH	Physcion	Beta-lactamase	LACTB2	Q53H82
DaH	emodin	Vascular endothelial growth factor receptor 3	FLT4	P35916
DaH	emodin	Vascular endothelial growth factor receptor 1	FLT1	P17948
DaH	(-)-catechin	Fatty acid synthase	FASN	P49327
DaH	aloe-emodin	Fatty acid synthase	FASN	P49327
DaH	EUPATIN	Coagulation factor VII	F7	P08709
DaH	emodin	Coagulation factor VII	F7	P08709
DaH	Physcion	Coagulation factor VII	F7	P08709
DaH	EUPATIN	Thrombin	F2	P00734
DaH	EUPATIN	Coagulation factor Xa	F10	P00742
DaH	emodin	Coagulation factor Xa	F10	P00742
DaH	Physcion	Coagulation factor Xa	F10	P00742
DaH	EUPATIN	Estrogen receptor beta	ESR2	Q92731
DaH	Toralactone	Estrogen receptor beta	ESR2	Q92731
DaH	(-)-catechin	Estrogen receptor	ESR1	P03372
DaH	Toralactone	Estrogen receptor	ESR1	P03372
DaH	emodin	Pro-epidermal growth factor	EGF	P01133
DaH	aloe-emodin	Cell division control protein 2 homolog	CRK2	Q9CAL3
DaH	Toralactone	Serine/threonine-protein kinase Chk1	CHEK1	O14757
DaH	(-)-catechin	Calmodulin	CALM1	P0DP23
DaH	EUPATIN	Calmodulin	CALM1	P0DP23
DaH	emodin	Calmodulin	CALM1	P0DP23
DaH	Crysophanol	Calmodulin	CALM1	P0DP23
DaH	Physcion	Calmodulin	CALM1	P0DP23
DaH	emodin	Tyrosine-protein kinase BTK	BTK	Q06187
DaH	EUPATIN	Androgen receptor	AR	P10275
DaH	aloe-emodin	Aldose reductase	AKR1B1	P15121
DaH	rhein	Aldose reductase	AKR1B1	P15121
DaH	(-)-catechin	mRNA of PKA Catalytic Subunit C-alpha	PRKACA	P17612
DaH	aloe-emodin	mRNA of PKA Catalytic Subunit C-alpha	PRKACA	P17612
DaH	Toralactone	mRNA of PKA Catalytic Subunit C-alpha	PRKACA	P17612
DaH	emodin	mRNA of PKA Catalytic Subunit C-alpha	PRKACA	P17612
DaH	Crysophanol	mRNA of PKA Catalytic Subunit C-alpha	PRKACA	P17612
DaH	Physcion	mRNA of PKA Catalytic Subunit C-alpha	PRKACA	P17612
DiH	catalpol	Dipeptidyl peptidase IV	DPP4	P27487
DiH	catalpol	Caspase-3	CASP3	P42574
DiH	acteoside	Intercellular adhesion molecule 1	ICAM1	P05362
DiH	catalpol	Superoxide dismutase [Cu-Zn]	SOD1	P00441
DiH	catalpol	Apoptosis regulator Bcl-2	BCL2	P10415
DL	Xanthine	——	ADRA1A	P35348
DL	Xanthine	——	ADRA1D	P25100
DL	Xanthine	——	APLP1	P51693
DL	Xanthine	——	TOX3	O15405
DL	Xanthine	——	GSK3A	P49840
DL	Xanthine	——	TRPV1	Q8NER1
DL	Xanthine	——	ADRB1	P08588
DL	Xanthine	——	PPARGC1B	Q86YN6
DL	Xanthine	——	DRD5	P21918
DL	Xanthine	——	ADORA1	P30542
DL	Xanthine	——	TRPM8	Q7Z2W7
DL	Xanthine	——	TRIM24	O15164
DL	Xanthine	——	ESRRG	P62508
DL	Xanthine	——	ADRA1B	P35368
DL	Xanthine	——	CHRNA7	P36544
DL	Xanthine	——	NAV2	Q8IVL1
DL	Xanthine	——	NKX3-1	Q99801
DL	Xanthine	——	SHH	Q15465
DL	Xanthine	——	UCHL1	P09936
DL	Xanthine	——	WNT4	P56705
DL	Xanthine	——	ATP2B4	P23634
DL	Xanthine	——	ADAM17	P78536
DL	Xanthine	——	SOX9	P48436
DL	Xanthine	——	TRPA1	O75762
DL	Xanthine	——	ESR2	Q92731
DL	Xanthine	——	ADRA2C	P18825
DL	Xanthine	——	INS	P01308
DL	Xanthine	——	TGFB1	P01137
DL	Xanthine	——	CETN2	P41208
DL	Xanthine	——	LEF1	Q9UJU2
DL	Xanthine	——	PDE4D	Q08499
DL	Xanthine	——	ARRB1	P49407
DL	Xanthine	——	ARRDC3	Q96B67
DL	Xanthine	——	ADRB3	P13945
DL	Xanthine	——	VDR	P11473
DL	Xanthine	——	ADRA2A	P08913
DL	Xanthine	——	ADRA2B	P18089
DL	Xanthine	——	CALCA	P01258
DL	Xanthine	——	ADRB2	P07550
DL	Xanthine	——	NR0B1	P51843
DL	Xanthine	——	ADRBK1	P25098
DL	Xanthine	——	FGFR2	P21802
DL	Xanthine	——	NCOA3	Q9Y6Q9
DL	Xanthine	——	GPER1	Q99527
DL	Xanthine	——	NOS1	P29475
DL	Xanthine	——	TPM1	P09493
DL	Xanthine	——	ESR1	P03372
DL	Xanthine	——	PHKG2	P15735
DL	Xanthine	——	TFAP2C	Q92754
DL	Xanthine	——	MED1	O95243
DL	Xanthine	——	CETN1	Q12798
DL	Xanthine	——	ARRB2	P32121
DL	Xanthine	——	PGR	P06401
DL	Xanthine	——	AREG	P15514
DL	Xanthine	——	WNT5A	P41221
DL	Xanthine	——	RGS2	P41220
DL	Xanthine	——	EDN2	P20800
DL	Guanosine	——	POLA1	P09884
DL	Guanosine	——	ADORA2B	P29275
DL	Guanosine	——	MMAB	Q96EY8
DL	Guanosine	——	MMACHC	Q9Y4U1
DL	Guanosine	——	BRCA1	P38398
DL	Guanosine	——	USP7	Q93009
DL	Guanosine	——	TACR2	P21452
DL	Guanosine	——	MGMT	P16455
DL	Guanosine	——	ADORA2A	P29274
DL	Guanosine	——	ADORA3	P0DMS8
DL	Guanosine	——	MTRR	Q9UBK8
DL	Guanosine	——	MMAA	Q8IVH4
DL	Guanosine	——	PRKDC	P78527
DL	Guanosine	——	TCF3	P15923
DL	Guanosine	——	UHRF2	Q96PU4
DL	Guanosine	——	HELLS	Q9NRZ9
DL	Guanosine	——	POLB	P06746
DL	Guanosine	——	ADORA1	P30542
DL	Guanosine	——	MTR	Q99707
DL	Guanosine	——	UHRF1	Q96T88
DL	Guanosine	——	KDM1A	O60341
DL	Guanosine	——	POLD1	P28340
DL	Guanosine	——	DNMT3B	Q9UBC3
DL	Guanosine	——	DNMT1	P26358
DL	Guanosine	——	TCN1	P20061
DL	Guanosine	——	CUBN	O60494
DL	Guanosine	——	DNMT3A	Q9Y6K1
DL	Guanosine	——	POLG	P54098
DL	Guanosine	——	PAX5	Q02548
DL	Guanosine	——	CTCF	P49711
DL	Guanosine	——	PNP	P00491
DL	Guanosine	——	MUT	P22033
DL	Guanosine	——	AMN	Q9BXJ7
DL	Guanosine	——	POLE	Q07864
DL	Guanosine	——	LIG4	P49917
DL	Guanosine	——	TRDMT1	O14717
DL	Guanosine	——	KDM3A	Q9Y4C1
DL	Xanthinin	——	PGR	P06401
DL	Xanthinin	——	PRKCA	P17252
DL	Xanthinin	——	COL5A1	P20908
DL	Xanthinin	——	ESR1	P03372
DL	Xanthinin	——	C5	P01031
DL	Xanthinin	——	UBR5	O95071
DL	Xanthinin	——	IL4	P05112
DL	Xanthinin	——	PDGFB	P01127
DL	Xanthinin	——	AR	P10275
DL	Xanthinin	——	PRKCD	Q05655
DL	Xanthinin	——	NOX1	Q9Y5S8
DL	Xanthinin	——	NEDD4	P46934
DL	Xanthinin	——	SRC	P12931
DL	Xanthinin	——	IL10	P22301
DL	Xanthinin	——	TSPO	B1AH88
DL	Xanthinin	——	VDR	P11473
DL	Xanthinin	——	CYP19A1	P11511
DL	Xanthinin	——	CACNA1I	Q9P0X4
DL	Xanthinin	——	PHB	P35232
DL	Xanthinin	——	SHBG	P04278
DL	Xanthinin	——	STAP1	Q9ULZ2
DL	Xanthinin	——	NR1I3	Q14994
DL	Xanthinin	——	CX3CR1	P49238
DL	Xanthinin	——	NR3C2	P08235
DL	Xanthinin	——	CACNA1G	O43497
DL	Xanthinin	——	MED1	O95243
DL	Xanthinin	——	SERPINB3	P29508
DL	Xanthinin	——	TGFB2	P61812
DL	Xanthinin	——	TNFAIP3	P21580
DL	Xanthinin	——	CD34	P28906
DL	Xanthinin	——	WNT4	P56705
DL	Xanthinin	——	TNFSF11	O14788
DL	Xanthinin	——	NKX3-1	Q99801
DL	Xanthinin	——	FOXP3	Q9BZS1
DL	Xanthinin	——	MMP28	Q9H239
DL	Xanthinin	——	ALDH1A1	P00352
DL	Xanthinin	——	S100A9	P06702
DL	Hyrcanoside	——	ATP1A1	P05023
DL	Hyrcanoside	——	GLRA3	O75311
DL	Hyrcanoside	——	GABRB3	P28472
DL,SNJ	Guanidine	——	GAMT	Q14353
DL,SNJ	Guanidine	——	KCNA3	P22001
DL,SNJ	Guanidine	——	KCNA1	Q09470
DL,SNJ	Guanidine	——	ADH1B	P00325
DL,SNJ	Guanidine	——	KCNA5	P22460
DL,SNJ	Guanidine	——	KCND3	Q9UK17
DL,SNJ	Guanidine	——	KCNQ1	P51787
DL,SNJ	Guanidine	——	CYGB	Q8WWM9
DL,SNJ	Guanidine	——	IGF1	P05019
DL,SNJ	Guanidine	——	EDN1	P05305
DL,SNJ	Guanidine	——	CNTNAP4	Q9C0A0
DL,SNJ	Guanidine	——	GRIN2A	Q12879
DL,SNJ	Guanidine	——	SPARC	P09486
DL,SNJ	Guanidine	——	CRLF1	O75462
DL,SNJ	Guanidine	——	ALDH1B1	P30837
DL,SNJ	Guanidine	——	DARS	P14868
DL,SNJ	Guanidine	——	MIP	P30301
DL,SNJ	Guanidine	——	STX1A	Q16623
DL,SNJ	Guanidine	——	NRXN2	P58401
DL,SNJ	Guanidine	——	DAB2IP	Q5VWQ8
DL,SNJ	Guanidine	——	DLG4	P78352
DL,SNJ	Guanidine	——	PRKAB1	Q9Y478
DL,SNJ	Guanidine	——	KCNA2	P16389
DL,SNJ	Guanidine	——	KCNC2	Q96PR1
DL,SNJ	Guanidine	——	KCND2	Q9NZV8
DL,SNJ	Guanidine	——	GUCY1B3	Q02153
DL,SNJ	Guanidine	——	FBP1	P09467
DL,SNJ	Guanidine	——	NRXN3	Q9HDB5
DL,SNJ	Guanidine	——	SHANK3	Q9BYB0
DL,SNJ	Guanidine	——	OXT	P01178
DL,SNJ	Guanidine	——	RNASE4	P34096
DL,SNJ	Guanidine	——	SLC17A7	Q9P2U7
DL,SNJ	Guanidine	——	SORCS3	Q9UPU3
DL,SNJ	Guanidine	——	FADD	Q13158
DL,SNJ	Guanidine	——	LEP	P41159
DL,SNJ	Guanidine	——	ANK3	Q12955
DL,SNJ	Guanidine	——	RYR3	Q15413
DL,SNJ	Guanidine	——	PAXBP1	Q9Y5B6
DL,SNJ	Guanidine	——	ADORA1	P30542
DL,SNJ	Guanidine	——	CYP2E1	P05181
DL,SNJ	Guanidine	——	RNASE1	P07998
DL,SNJ	Guanidine	——	ADH1A	P07327
DL,SNJ	Guanidine	——	TPO	P07202
DL,SNJ	Guanidine	——	KCNC1	P48547
DL,SNJ	Guanidine	——	KCNA4	P22459
DL,SNJ	Guanidine	——	GATM	P50440
DL,SNJ	Guanidine	——	DGKI	O75912
DL,SNJ	Guanidine	——	LRRC4B	Q9NT99
DL,SNJ	Guanidine	——	ACY3	Q96HD9
DL,SNJ	Guanidine	——	MAGI2	Q86UL8
DL,SNJ	Guanidine	——	RAB3A	P20336
DL,SNJ	Guanidine	——	CYP11A1	P05108
DL,SNJ	Guanidine	——	RNASE8	Q8TDE3
DL,SNJ	Guanidine	——	SNTG2	Q9NY99
DL,SNJ	Guanidine	——	NLGN1	Q8N2Q7
DL,SNJ	Guanidine	——	KCNE5	Q9UJ90
DL,SNJ	Guanidine	——	ZPR1	O75312
DL,SNJ	Guanidine	——	PAX7	P23759
DL,SNJ	Guanidine	——	ADH4	P08319
DL,SNJ	Guanidine	——	ACY1	Q03154
DL,SNJ	Guanidine	——	ALDH2	P05091
DL,SNJ	Guanidine	——	KCNA10	Q16322
DL,SNJ	Guanidine	——	CAT	P04040
DL,SNJ	Guanidine	——	ADH1C	P00326
DL,SNJ	Guanidine	——	KCNA7	Q96RP8
DL,SNJ	Guanidine	——	KCNK4	Q9NYG8
DL,SNJ	Guanidine	——	ADH7	P40394
DL,SNJ	Guanidine	——	AQP8	O94778
DL,SNJ	Guanidine	——	ASPA	P45381
DL,SNJ	Guanidine	——	APOE	P02649
DL,SNJ	Guanidine	——	MC4R	P32245
DL,SNJ	Guanidine	——	SCN5A	Q14524
DL,SNJ	Guanidine	——	KCNIP2	Q9NS61
DL,SNJ	Guanidine	——	SCGB1A1	P11684
DL,SNJ	Guanidine	——	CACNA1D	Q01668
DL,SNJ	Guanidine	——	PPARD	Q03181
DL,SNJ	Guanidine	——	ALDH3B1	P43353
DL,SNJ	Guanidine	——	ALDH3B2	P48448
DL,SNJ	Guanidine	——	GJA5	P36382
DL,SNJ	Guanidine	——	KCND1	Q9NSA2
DL,SNJ	Guanidine	——	KCNC3	Q14003
DL,SNJ	Guanidine	——	KCNB1	Q14721
DL,SNJ	Guanidine	——	KCNB2	Q92953
DL,SNJ	Guanidine	——	KCNA6	P17658
DL,SNJ	Guanidine	——	IYD	Q6PHW0
DL,SNJ	Guanidine	——	NFIB	O00712
DL,SNJ	Guanidine	——	ARX	Q96QS3
DL,SNJ	Guanidine	——	NRXN1	P58400
DL,SNJ	Guanidine	——	SOX15	O60248
DL,SNJ	Guanidine	——	IL1B	P01584
DL,SNJ	Guanidine	——	SCN10A	Q9Y5Y9
DL,SNJ	Guanidine	——	GPX7	Q96SL4
DL,SNJ	Guanidine	——	OXTR	P30559
DL,SNJ	Guanidine	——	RAPGEF2	Q9Y4G8
DL,SNJ	Guanidine	——	NKX2-1	P43699
DL,SNJ	Guanidine	——	NPPA	P01160
DL,SNJ	Guanidine	——	RNASE2	P10153
DL,SNJ	Guanidine	——	FAS	P25445
DL,SNJ	4-Guanidino-1-Butanol	——	RDH11	Q8TC12
DL,SNJ	4-Guanidino-1-Butanol	——	RDH5	Q92781
DL,SNJ	4-Guanidino-1-Butanol	——	ALDH1A1	P00352
DL,SNJ	4-Guanidino-1-Butanol	——	ALDH1A2	O94788
DL,SNJ	4-Guanidino-1-Butanol	——	OPN4	Q9UHM6
DL,SNJ	4-Guanidino-1-Butanol	——	HSD17B7	P56937
DL,SNJ	4-Guanidino-1-Butanol	——	GATA3	P23771
DL,SNJ	4-Guanidino-1-Butanol	——	CRYM	Q14894
DL,SNJ	4-Guanidino-1-Butanol	——	CYP1A1	P04798
DL,SNJ	4-Guanidino-1-Butanol	——	RBP3	P10745
DL,SNJ	4-Guanidino-1-Butanol	——	ALDH1A3	P47895
DL,SNJ	4-Guanidino-1-Butanol	——	RLBP1	P12271
DL,SNJ	4-Guanidino-1-Butanol	——	ALDH3A1	P30838
DL,SNJ	4-Guanidino-1-Butanol	——	RDH10	Q8IZV5
DL,SNJ	4-Guanidino-1-Butanol	——	AR	P10275
DL,SNJ	4-Guanidino-1-Butanol	——	ASCL1	P50553
DL,SNJ	4-Guanidino-1-Butanol	——	TSPO	B1AH88
DL,SNJ	4-Guanidino-1-Butanol	——	RETSAT	Q6NUM9
DL,SNJ	4-Guanidino-1-Butanol	——	RDH12	Q96NR8
DL,SNJ	4-Guanidino-1-Butanol	——	RDH14	Q9HBH5
DL,SNJ	4-Guanidino-1-Butanol	——	RHO	P08100
DL,SNJ	4-Guanidino-1-Butanol	——	ALDH8A1	Q9H2A2
DL,SNJ	4-Guanidino-1-Butanol	——	THRA	P10827
DL,SNJ	4-Guanidino-1-Butanol	——	DLX5	P56178
DL,SNJ	4-Guanidino-1-Butanol	——	OPN5	Q6U736
DL,SNJ	4-Guanidino-1-Butanol	——	RDH13	Q8NBN7
DL,SNJ	4-Guanidino-1-Butanol	——	DHRS4	Q9BTZ2
DL,SNJ	4-Guanidino-1-Butanol	——	RDH8	Q9NYR8
DL,SNJ	4-Guanidino-1-Butanol	——	RS1	O15537
DL,SNJ	4-Guanidino-1-Butanol	——	SHBG	P04278
DL,SNJ	4-Guanidino-1-Butanol	——	PAX2	Q02962
DL,SNJ	4-Guanidino-1-Butanol	——	RET	P07949
DL,SNJ	4-Guanidino-1-Butanol	——	DHRS9	Q9BPW9
DL,SNJ	4-Guanidino-1-Butanol	——	DHRS3	O75911
DL,SNJ	4-Guanidino-1-Butanol	——	RBP1	O95153
DL,SNJ	4-Guanidino-1-Butanol	——	LRAT	O95237
DL,SNJ	4-Guanidino-1-Butanol	——	CTSH	P09668
DL,SNJ	4-Guanidino-1-Butanol	——	DHRS2	Q13268
DL,SNJ	4-Guanidino-1-Butanol	——	CBR3	O75828
DL,SNJ	4-Guanidino-1-Butanol	——	THRB	P10828
DL,SNJ	4-Guanidino-1-Butanol	——	CBR1	P16152
DL,SNJ	Cholesterol	——	VDR	P11473
DL,SNJ	Cholesterol	——	PGR	P06401
DL,SNJ	Cholesterol	——	SNAI2	O43623
DL,SNJ	Cholesterol	——	FGF23	Q9GZV9
DL,SNJ	Cholesterol	——	BAX	Q07812
DL,SNJ	Cholesterol	——	S100G	P29377
DL,SNJ	Cholesterol	——	NR1H4	Q96RI1
DL,SNJ	Cholesterol	——	CYP27B1	O15528
DL,SNJ	Cholesterol	——	NFKB1	P19838
DL,SNJ	Cholesterol	——	MED1	O95243
DL,SNJ	Cholesterol	——	GFI1	Q99684
DL,SNJ	Cholesterol	——	KL	Q9UEF7
DL,SNJ	Cholesterol	——	CYP27A1	Q02318
DL,SNJ	Cholesterol	——	TRIM24	O15164
DL,SNJ	Cholesterol	——	GC	P02774
DL,SNJ	Cholesterol	——	AKR1C3	P42330
DL,SNJ	Cholesterol	——	SNAI1	O95863
DL,SNJ	Cholesterol	——	LANCL2	Q9NS86
DL,SNJ	Cholesterol	——	CYP2R1	Q6VVX0
DL,SNJ	Cholesterol	——	KANK2	Q63ZY3
DL,SNJ	Cholesterol	——	SNW1	Q13573
DL,SNJ	Cholesterol	——	CYP24A1	Q07973
DL,SNJ	Cholesterol	——	CYP3A4	P08684
DL,SNJ	Cholesterol	——	WNT4	P56705
DL,SNJ	Cholesterol	——	PML	P29590
DL,SNJ	Cholesterol	——	IRX5	P78411
DL,SNJ	Cholesterol	——	ESR1	P03372
DL,SNJ	Cholesterol	——	GPBAR1	Q8TDU6
DL,SNJ	Cholesterol	——	CALB1	P05937
DL,SNJ	Cholesterol	——	TCF3	P15923
DL,SNJ	Cholesterol	——	B4GALT1	P15291
DL,SNJ	Cholesterol	——	RXRA	P19793
MDP	Mairin	Progesterone receptor	PGR	P06401
MDP	5-[[5-(4-methoxyphenyl)-2-furyl]methylene]barbituric acid	Heat shock protein HSP 90	HSP90AB1	P08238
MDP	5-[[5-(4-methoxyphenyl)-2-furyl]methylene]barbituric acid	Glycogen synthase kinase-3 beta	GSK3B	P49841
MDP	5-[[5-(4-methoxyphenyl)-2-furyl]methylene]barbituric acid	Estrogen receptor	ESR1	P03372
MDP	5-[[5-(4-methoxyphenyl)-2-furyl]methylene]barbituric acid	Cell division protein kinase 2	CDK2	P24941
MDP	5-[[5-(4-methoxyphenyl)-2-furyl]methylene]barbituric acid	mRNA of PKA Catalytic Subunit C-alpha	PRKACA	P17612
MDP,SCP	kaempferol	Dipeptidyl peptidase IV	DPP4	P27487
MDP,SCP	kaempferol	DNA topoisomerase II	TOP2A	P11388
MDP,SCP	kaempferol	Transcription factor p65	RELA	Q04206
MDP,SCP	kaempferol	Inhibitor of nuclear factor kappa-B kinase subunit beta	IKBKB	O14920
MDP,SCP	kaempferol	RAC-alpha serine/threonine-protein kinase	AKT1	P31749
MDP,SCP	kaempferol	Apoptosis regulator BAX	BAX	Q07812
MDP,SCP	kaempferol	Activator of 90 kDa heat shock protein ATPase homolog 1	AHSA1	O95433
MDP,SCP	kaempferol	Caspase-3	CASP3	P42574
MDP,SCP	kaempferol	Signal transducer and activator of transcription 1-alpha/beta	STAT1	P42224
MDP,SCP	kaempferol	Peroxisome proliferator-activated receptor gamma	PPARG	P37231
MDP,SCP	kaempferol	Cytochrome P450 1A1	CYP1A1	P04798
MDP,SCP	kaempferol	Intercellular adhesion molecule 1	ICAM1	P05362
MDP,SCP	kaempferol	Nuclear receptor subfamily 1 group I member 2	NR1I2	O75469
MDP,SCP	kaempferol	Cytochrome P450 1B1	CYP1B1	Q16678
MDP,SCP	kaempferol	Hyaluronan synthase 2	HAS2	Q92819
MDP,SCP	kaempferol	26S proteasome non-ATPase regulatory subunit 3	PSMD3	O43242
MDP,SCP	kaempferol	Solute carrier family 2, facilitated glucose transporter member 4	SLC2A4	P14672
MDP,SCP	kaempferol	Nuclear receptor subfamily 1 group I member 3	NR1I3	Q14994
MDP,SCP	kaempferol	Type I iodothyronine deiodinase	DIO1	P49895
MDP,SCP	kaempferol	Peroxidase C1A	PRXC1A	P00433
MDP,SCP	kaempferol	Antileukoproteinase	SLPI	P03973
MDP,SCP	kaempferol	Xanthine dehydrogenase/oxidase	XDH	P47989
MDP,SCP	kaempferol	Vascular cell adhesion protein 1	VCAM1	P19320
MDP,SCP	kaempferol	Tumor necrosis factor	TNF	P01375
MDP,SCP	kaempferol	Sodium-dependent noradrenaline transporter	SLC6A2	P23975
MDP,SCP	kaempferol	E-selectin	SELE	P16581
MDP,SCP	kaempferol	Prostaglandin G/H synthase 2	PTGS2	P35354
MDP,SCP	kaempferol	Prostaglandin G/H synthase 1	PTGS1	P23219
MDP,SCP	kaempferol	Trypsin-1	PRSS1	P07477
MDP,SCP	kaempferol	Serine/threonine-protein phosphatase 2B catalytic subunit alpha isoform	PPP3CA	Q08209
MDP,SCP	kaempferol	Peroxisome proliferator activated receptor gamma	PPARG	P37231
MDP,SCP	kaempferol	Phosphatidylinositol-4,5-bisphosphate 3-kinase catalytic subunit, gamma isoform	PIK3CG	P48736
MDP,SCP	kaempferol	Progesterone receptor	PGR	P06401
MDP,SCP	kaempferol	Nitric-oxide synthase, endothelial	NOS3	P29474
MDP,SCP	kaempferol	Nitric oxide synthase, inducible	NOS2	P35228
MDP,SCP	kaempferol	Nuclear receptor coactivator 2	NCOA2	Q15596
MDP,SCP	kaempferol	Interstitial collagenase	MMP1	P03956
MDP,SCP	kaempferol	Mitogen-activated protein kinase 8	MAPK8	P45983
MDP,SCP	kaempferol	Transcription factor AP-1	JUN	P05412
MDP,SCP	kaempferol	Insulin receptor	INSR	P06213
MDP,SCP	kaempferol	Heat shock protein HSP 90	HSP90AB1	P08238
MDP,SCP	kaempferol	Heme oxygenase 1	HMOX1	P09601
MDP,SCP	kaempferol	Glutathione S-transferase P	GSTP1	P09211
MDP,SCP	kaempferol	Glutathione S-transferase Mu 2	GSTM2	P28161
MDP,SCP	kaempferol	Glutathione S-transferase Mu 1	GSTM1	P09488
MDP,SCP	kaempferol	Gamma-aminobutyric acid receptor subunit alpha-1	GABRA1	P14867
MDP,SCP	kaempferol	Coagulation factor VII	F7	P08709
MDP,SCP	kaempferol	Thrombin	F2	P00734
MDP,SCP	kaempferol	Cytochrome P450 3A4	CYP3A4	P08684
MDP,SCP	kaempferol	Cytochrome P450 1A2	CYP1A2	P05177
MDP,SCP	kaempferol	Cell division control protein 2 homolog	CRK2	Q9CAL3
MDP,SCP	kaempferol	Muscarinic acetylcholine receptor M2	CHRM2	P08172
MDP,SCP	kaempferol	Muscarinic acetylcholine receptor M1	CHRM1	P11229
MDP,SCP	kaempferol	Calmodulin	CALM1	P0DP23
MDP,SCP	kaempferol	Apoptosis regulator Bcl-2	BCL2	P10415
MDP,SCP	kaempferol	Gamma-aminobutyric-acid receptor alpha-2 subunit	GABRA2	P47869
MDP,SCP	kaempferol	Androgen receptor	AR	P10275
MDP,SCP	kaempferol	Arachidonate 5-lipoxygenase	ALOX5	P09917
MDP,SCP	kaempferol	Aldo-keto reductase family 1 member C3	AKR1C3	P42330
MDP,SCP	kaempferol	Aryl hydrocarbon receptor	AHR	P35869
MDP,SCP	kaempferol	Alpha-1B adrenergic receptor	ADRA1B	P35368
MDP,SCP	kaempferol	Acetylcholinesterase	ACHE	P22303
MDP,SCP	kaempferol	mRNA of PKA Catalytic Subunit C-alpha	PRKACA	P17612
MDP,SQ	quercetin	Dipeptidyl peptidase IV	DPP4	P27487
MDP,SQ	quercetin	DNA topoisomerase II	TOP2A	P11388
MDP,SQ	quercetin	Transcription factor p65	RELA	Q04206
MDP,SQ	quercetin	RAC-alpha serine/threonine-protein kinase	AKT1	P31749
MDP,SQ	quercetin	G1/S-specific cyclin-D1	CCND1	P24385
MDP,SQ	quercetin	Bcl-2-like protein 1	BCL2L1	Q07817
MDP,SQ	quercetin	Proto-oncogene c-Fos	FOS	P01100
MDP,SQ	quercetin	Cyclin-dependent kinase inhibitor 1	CDKN1A	P38936
MDP,SQ	quercetin	Eukaryotic translation initiation factor 6	EIF6	P56537
MDP,SQ	quercetin	Apoptosis regulator BAX	BAX	Q07812
MDP,SQ	quercetin	Caspase-9	CASP9	P55211
MDP,SQ	quercetin	Matrix metalloproteinase-9	MMP9	P14780
MDP,SQ	quercetin	Interleukin-10	IL10	P22301
MDP,SQ	quercetin	Cyclin-dependent kinase inhibitor 2A, isoforms 1/2/3	CDKN2A	A0A340X065
MDP,SQ	quercetin	Activator of 90 kDa heat shock protein ATPase homolog 1	AHSA1	O95433
MDP,SQ	quercetin	Caspase-3	CASP3	P42574
MDP,SQ	quercetin	ETS domain-containing protein Elk-1	ELK1	P19419
MDP,SQ	quercetin	NF-kappa-B inhibitor alpha	CHUK	O15111
MDP,SQ	quercetin	Caspase-8	CASP8	Q14790
MDP,SQ	quercetin	RAF proto-oncogene serine/threonine-protein kinase	RAF1	P04049
MDP,SQ	quercetin	Protein kinase C alpha type	PRKCA	P17252
MDP,SQ	quercetin	Hypoxia-inducible factor 1-alpha	HIF1A	Q16665
MDP,SQ	quercetin	Signal transducer and activator of transcription 1-alpha/beta	STAT1	P42224
MDP,SQ	quercetin	Protein CBFA2T1	RUNX1T1	Q06455
MDP,SQ	quercetin	Probable E3 ubiquitin-protein ligase HERC5	——	——
MDP,SQ	quercetin	Receptor tyrosine-protein kinase erbB-2	ERBB2	P04626
MDP,SQ	quercetin	Peroxisome proliferator-activated receptor gamma	PPARG	P37231
MDP,SQ	quercetin	Caveolin-1	CAV1	Q03135
MDP,SQ	quercetin	Myc proto-oncogene protein	MYC	P01106
MDP,SQ	quercetin	Cytochrome P450 1A1	CYP1A1	P04798
MDP,SQ	quercetin	Intercellular adhesion molecule 1	ICAM1	P05362
MDP,SQ	quercetin	Interleukin-8	CXCL8	P10145
MDP,SQ	quercetin	Protein kinase C beta type	PRKCB	P05771
MDP,SQ	quercetin	Baculoviral IAP repeat-containing protein 5	BIRC5	O15392
MDP,SQ	quercetin	Dual oxidase 2	DUOX2	Q9NRD8
MDP,SQ	quercetin	Nitric oxide synthase, endothelial	NOS3	P29474
MDP,SQ	quercetin	Heat shock protein beta-1	HSPB1	P04792
MDP,SQ	quercetin	Transforming growth factor beta-1	TGFB1	P01137
MDP,SQ	quercetin	Nuclear receptor subfamily 1 group I member 2	NR1I2	O75469
MDP,SQ	quercetin	Cytochrome P450 1B1	CYP1B1	Q16678
MDP,SQ	quercetin	G2/mitotic-specific cyclin-B1	CCNB1	P14635
MDP,SQ	quercetin	Plasminogen activator inhibitor 1	SERPINE1	P05121
MDP,SQ	quercetin	Phosphatidylinositol-3,4,5-trisphosphate 3-phosphatase and dual-specificity protein phosphatase PTEN	PTEN	P60484
MDP,SQ	quercetin	Interleukin-1 alpha	IL1A	P01583
MDP,SQ	quercetin	DNA topoisomerase 2-alpha	TOP2A	P11388
MDP,SQ	quercetin	Neutrophil cytosol factor 1	NCF1	P14598
MDP,SQ	quercetin	ATP-binding cassette sub-family G member 2	ABCG2	Q9UNQ0
MDP,SQ	quercetin	Hyaluronan synthase 2	HAS2	Q92819
MDP,SQ	quercetin	Nuclear factor erythroid 2-related factor 2	NFE2L2	Q16236
MDP,SQ	quercetin	Poly [ADP-ribose] polymerase 1	PARP1	P09874
MDP,SQ	quercetin	26S proteasome non-ATPase regulatory subunit 3	PSMD3	O43242
MDP,SQ	quercetin	Solute carrier family 2, facilitated glucose transporter member 4	SLC2A4	P14672
MDP,SQ	quercetin	C-X-C motif chemokine 11	CXCL11	O14625
MDP,SQ	quercetin	C-X-C motif chemokine 2	CXCL2	P19875
MDP,SQ	quercetin	DDB1- and CUL4-associated factor 5	DCAF5	Q96JK2
MDP,SQ	quercetin	Nuclear receptor subfamily 1 group I member 3	NR1I3	Q14994
MDP,SQ	quercetin	Serine/threonine-protein kinase Chk2	CHEK2	O96017
MDP,SQ	quercetin	Claudin-4	CLDN4	O14493
MDP,SQ	quercetin	Peroxisome proliferator-activated receptor alpha	PPARA	Q07869
MDP,SQ	quercetin	Peroxisome proliferator-activated receptor delta	PPARD	Q03181
MDP,SQ	quercetin	Heat shock factor protein 1	HSF1	Q00613
MDP,SQ	quercetin	C-reactive protein	CRP	P02741
MDP,SQ	quercetin	C-X-C motif chemokine 10	CXCL10	P02778
MDP,SQ	quercetin	Inhibitor of nuclear factor kappa-B kinase subunit alpha	CHUK	O15111
MDP,SQ	quercetin	Osteopontin	SPP1	P10451
MDP,SQ	quercetin	Runt-related transcription factor 2	RUNX2	Q13950
MDP,SQ	quercetin	Ras association domain-containing protein 1	RASSF1	Q9NS23
MDP,SQ	quercetin	Transcription factor E2F1	E2F1	Q01094
MDP,SQ	quercetin	Transcription factor E2F2	E2F1	Q01094
MDP,SQ	quercetin	Insulin-like growth factor-binding protein 3	IGFBP3	P17936
MDP,SQ	quercetin	Insulin-like growth factor II	IGF2	P01344
MDP,SQ	quercetin	CD40 ligand	CD40LG	P29965
MDP,SQ	quercetin	Interferon regulatory factor 1	IRF1	P10914
MDP,SQ	quercetin	Receptor tyrosine-protein kinase erbB-3	ERBB3	P21860
MDP,SQ	quercetin	Type I iodothyronine deiodinase	DIO1	P49895
MDP,SQ	quercetin	Procollagen C-endopeptidase enhancer 1	PCOLCE	Q15113
MDP,SQ	quercetin	Puromycin-sensitive aminopeptidase	NPEPPS	P55786
MDP,SQ	quercetin	Hexokinase-2	HK2	P52789
MDP,SQ	quercetin	Homeobox protein Nkx-3.1	NKX3-1	Q99801
MDP,SQ	quercetin	Ras GTPase-activating protein 1	RASA1	P20936
MDP,SQ	quercetin	Peroxidase C1A	PRXC1A	P00433
MDP,SQ	quercetin	Xanthine dehydrogenase/oxidase	XDH	P47989
MDP,SQ	quercetin	Vascular endothelial growth factor A	VEGFA	P15692
MDP,SQ	quercetin	Vascular cell adhesion protein 1	VCAM1	P19320
MDP,SQ	quercetin	Cellular tumor antigen p53	TP53	P04637
MDP,SQ	quercetin	DNA topoisomerase 1	TOP1	P11387
MDP,SQ	quercetin	Tumor necrosis factor	TNF	P01375
MDP,SQ	quercetin	Thrombomodulin	THBD	P07204
MDP,SQ	quercetin	Estrogen sulfotransferase	SULT1E1	P49888
MDP,SQ	quercetin	Superoxide dismutase [Cu-Zn]	SOD1	P00441
MDP,SQ	quercetin	E-selectin	SELE	P16581
MDP,SQ	quercetin	Sodium channel protein type 5 subunit alpha	SCN5A	Q14524
MDP,SQ	quercetin	Retinoic acid receptor RXR-alpha	RXRA	P19793
MDP,SQ	quercetin	Retinoblastoma-associated protein	RB1	P06400
MDP,SQ	quercetin	Prostaglandin G/H synthase 2	PTGS2	P35354
MDP,SQ	quercetin	Prostaglandin G/H synthase 1	PTGS1	P23219
MDP,SQ	quercetin	Prostaglandin E2 receptor EP3 subtype	PTGER3	P43115
MDP,SQ	quercetin	Trypsin-1	PRSS1	P07477
MDP,SQ	quercetin	Peroxisome proliferator activated receptor gamma	PPARG	P37231
MDP,SQ	quercetin	NADPH--cytochrome P450 reductase	POR	P16435
MDP,SQ	quercetin	Serum paraoxonase/arylesterase 1	PON1	P27169
MDP,SQ	quercetin	Urokinase-type plasminogen activator	PLAU	P00749
MDP,SQ	quercetin	Tissue-type plasminogen activator	PLAT	P00750
MDP,SQ	quercetin	Phosphatidylinositol-4,5-bisphosphate 3-kinase catalytic subunit, gamma isoform	PIK3CG	P48736
MDP,SQ	quercetin	Ornithine decarboxylase	ODC1	P11926
MDP,SQ	quercetin	NAD(P)H dehydrogenase [quinone] 1	NQO1	P15559
MDP,SQ	quercetin	Nitric-oxide synthase, endothelial	NOS3	P29474
MDP,SQ	quercetin	Nuclear receptor coactivator 2	NCOA2	Q15596
MDP,SQ	quercetin	Myeloperoxidase	MPO	P05164
MDP,SQ	quercetin	Stromelysin-1	MMP3	P08254
MDP,SQ	quercetin	72 kDa type IV collagenase	MMP2	P08253
MDP,SQ	quercetin	Interstitial collagenase	MMP1	P03956
MDP,SQ	quercetin	Maltase-glucoamylase, intestinal	MGAM	O43451
MDP,SQ	quercetin	Mitogen-activated protein kinase 1	MAPK1	P28482
MDP,SQ	quercetin	Amine oxidase [flavin-containing] B	MAOB	P27338
MDP,SQ	quercetin	Potassium voltage-gated channel subfamily H member 2	KCNH2	Q12809
MDP,SQ	quercetin	Transcription factor AP-1	JUN	P05412
MDP,SQ	quercetin	Insulin receptor	INSR	P06213
MDP,SQ	quercetin	Interleukin-6	IL6	P05231
MDP,SQ	quercetin	Interleukin-2	IL2	P60568
MDP,SQ	quercetin	Interleukin-1 beta	IL1B	P01584
MDP,SQ	quercetin	Interferon gamma	IFNG	P01579
MDP,SQ	quercetin	78 kDa glucose-regulated protein	HSPA5	P11021
MDP,SQ	quercetin	Heat shock protein HSP 90	HSP90AB1	P08238
MDP,SQ	quercetin	Heme oxygenase 1	HMOX1	P09601
MDP,SQ	quercetin	DNA gyrase subunit B	gyrB	P0AES6
MDP,SQ	quercetin	Glutathione S-transferase P	GSTP1	P09211
MDP,SQ	quercetin	Glutathione S-transferase Mu 2	GSTM2	P28161
MDP,SQ	quercetin	Glutathione S-transferase Mu 1	GSTM1	P09488
MDP,SQ	quercetin	Gap junction alpha-1 protein	GJA1	P17302
MDP,SQ	quercetin	Gamma-aminobutyric acid receptor subunit alpha-1	GABRA1	P14867
MDP,SQ	quercetin	Coagulation factor VII	F7	P08709
MDP,SQ	quercetin	Tissue factor	F3	P13726
MDP,SQ	quercetin	Thrombin	F2	P00734
MDP,SQ	quercetin	Coagulation factor Xa	F10	P00742
MDP,SQ	quercetin	Epidermal growth factor receptor	EGFR	P00533
MDP,SQ	quercetin	Pro-epidermal growth factor	EGF	P01133
MDP,SQ	quercetin	Cytochrome P450 3A4	CYP3A4	P08684
MDP,SQ	quercetin	Cytochrome P450 1A2	CYP1A2	P05177
MDP,SQ	quercetin	Cathepsin D	CTSD	P07339
MDP,SQ	quercetin	Cell division control protein 2 homolog	CRK2	Q9CAL3
MDP,SQ	quercetin	Collagen alpha-1(III) chain	COL3A1	P02461
MDP,SQ	quercetin	Collagen alpha-1(I) chain	COL1A1	P02452
MDP,SQ	quercetin	C-C motif chemokine 2	CCL2	P13500
MDP,SQ	quercetin	Apoptosis regulator Bcl-2	BCL2	P10415
MDP,SQ	quercetin	Androgen receptor	AR	P10275
MDP,SQ	quercetin	Arachidonate 5-lipoxygenase	ALOX5	P09917
MDP,SQ	quercetin	Aldose reductase	AKR1B1	P15121
MDP,SQ	quercetin	Aryl hydrocarbon receptor	AHR	P35869
MDP,SQ	quercetin	Beta-2 adrenergic receptor	ADRB2	P07550
MDP,SQ	quercetin	Prostatic acid phosphatase	ACPP	P15309
MDP,SQ	quercetin	Acetylcholinesterase	ACHE	P22303
MDP,SQ	quercetin	Acetyl-CoA carboxylase 1	ACACA	Q13085
MDP,SQ	quercetin	mRNA of PKA Catalytic Subunit C-alpha	PRKACA	P17612
SCP	Marmesin	Dipeptidyl peptidase IV	DPP4	P27487
SCP	8-Isopentenyl-kaempferol	DNA topoisomerase II	TOP2A	P11388
SCP	8-Isopentenyl-kaempferol	Dipeptidyl peptidase IV	DPP4	P27487
SCP	Marmesin	Sodium-dependent serotonin transporter	SLC6A4	P31645
SCP	8-Isopentenyl-kaempferol	Sodium channel protein type 5 subunit alpha	SCN5A	Q14524
SCP	(1R,3aS,4R,6aS)-1,4-bis(3,4-dimethoxyphenyl)-1,3,3a,4,6,6a-hexahydrofuro[4,3-c]furan	Sodium channel protein type 5 subunit alpha	SCN5A	Q14524
SCP	Marmesin	Retinoic acid receptor RXR-alpha	RXRA	P19793
SCP	8-Isopentenyl-kaempferol	Retinoic acid receptor RXR-alpha	RXRA	P19793
SCP	8-Isopentenyl-kaempferol	Glycogen phosphorylase, muscle form	PYGM	P11217
SCP	Marmesin	mRNA of Protein-tyrosine phosphatase, non-receptor type 1	PTPN1	P18031
SCP	Marmesin	Prostaglandin G/H synthase 2	PTGS2	P35354
SCP	8-Isopentenyl-kaempferol	Prostaglandin G/H synthase 2	PTGS2	P35354
SCP	(1R,3aS,4R,6aS)-1,4-bis(3,4-dimethoxyphenyl)-1,3,3a,4,6,6a-hexahydrofuro[4,3-c]furan	Prostaglandin G/H synthase 2	PTGS2	P35354
SCP	Marmesin	Prostaglandin G/H synthase 1	PTGS1	P23219
SCP	8-Isopentenyl-kaempferol	Prostaglandin G/H synthase 1	PTGS1	P23219
SCP	8-Isopentenyl-kaempferol	Trypsin-1	PRSS1	P07477
SCP	8-Isopentenyl-kaempferol	Peroxisome proliferator activated receptor gamma	PPARG	P37231
SCP	Marmesin	Proto-oncogene serine/threonine-protein kinase Pim-1	PIM1	P11309
SCP	8-Isopentenyl-kaempferol	Proto-oncogene serine/threonine-protein kinase Pim-1	PIM1	P11309
SCP	Marmesin	Phosphatidylinositol-4,5-bisphosphate 3-kinase catalytic subunit, gamma isoform	PIK3CG	P48736
SCP	8-Isopentenyl-kaempferol	CGMP-inhibited 3',5'-cyclic phosphodiesterase A	PDE3A	Q14432
SCP	Cycloartenol	Mineralocorticoid receptor	NR3C2	P08235
SCP	8-Isopentenyl-kaempferol	Nuclear receptor coactivator 2	NCOA2	Q15596
SCP	(1R,3aS,4R,6aS)-1,4-bis(3,4-dimethoxyphenyl)-1,3,3a,4,6,6a-hexahydrofuro[4,3-c]furan	Nuclear receptor coactivator 2	NCOA2	Q15596
SCP	8-Isopentenyl-kaempferol	Mitogen-activated protein kinase 14	MAPK14	Q16539
SCP	Marmesin	Leukotriene A-4 hydrolase	LTA4H	P09960
SCP	8-Isopentenyl-kaempferol	Vascular endothelial growth factor receptor 2	KDR	P35968
SCP	8-Isopentenyl-kaempferol	Calcium-activated potassium channel subunit alpha 1	KCNMA1	Q12791
SCP	8-Isopentenyl-kaempferol	Potassium voltage-gated channel subfamily H member 2	KCNH2	Q12809
SCP	(1R,3aS,4R,6aS)-1,4-bis(3,4-dimethoxyphenyl)-1,3,3a,4,6,6a-hexahydrofuro[4,3-c]furan	Potassium voltage-gated channel subfamily H member 2	KCNH2	Q12809
SCP	Marmesin	Heat shock protein HSP 90	HSP90AB1	P08238
SCP	8-Isopentenyl-kaempferol	Heat shock protein HSP 90	HSP90AB1	P08238
SCP	8-Isopentenyl-kaempferol	Glycogen synthase kinase-3 beta	GSK3B	P49841
SCP	8-Isopentenyl-kaempferol	Gamma-aminobutyric acid receptor subunit alpha-1	GABRA1	P14867
SCP	Marmesin	Beta-lactamase	LACTB2	Q53H82
SCP	8-Isopentenyl-kaempferol	Ferrichrome-iron receptor	fhuA	P06971
SCP	8-Isopentenyl-kaempferol	Coagulation factor VII	F7	P08709
SCP	Marmesin	Thrombin	F2	P00734
SCP	8-Isopentenyl-kaempferol	Thrombin	F2	P00734
SCP	8-Isopentenyl-kaempferol	Coagulation factor Xa	F10	P00742
SCP	(1R,3aS,4R,6aS)-1,4-bis(3,4-dimethoxyphenyl)-1,3,3a,4,6,6a-hexahydrofuro[4,3-c]furan	Coagulation factor Xa	F10	P00742
SCP	Marmesin	Estrogen receptor	ESR1	P03372
SCP	8-Isopentenyl-kaempferol	Estrogen receptor	ESR1	P03372
SCP	(1R,3aS,4R,6aS)-1,4-bis(3,4-dimethoxyphenyl)-1,3,3a,4,6,6a-hexahydrofuro[4,3-c]furan	Muscarinic acetylcholine receptor M3	CHRM3	P20309
SCP	Marmesin	Muscarinic acetylcholine receptor M2	CHRM2	P08172
SCP	Marmesin	Muscarinic acetylcholine receptor M1	CHRM1	P11229
SCP	Marmesin	Serine/threonine-protein kinase Chk1	CHEK1	O14757
SCP	8-Isopentenyl-kaempferol	Serine/threonine-protein kinase Chk1	CHEK1	O14757
SCP	Marmesin	Cell division protein kinase 2	CDK2	P24941
SCP	8-Isopentenyl-kaempferol	Cell division protein kinase 2	CDK2	P24941
SCP	8-Isopentenyl-kaempferol	Cyclin-A2	CCNA2	P20248
SCP	8-Isopentenyl-kaempferol	Calmodulin	CALM1	P0DP23
SCP	(1R,3aS,4R,6aS)-1,4-bis(3,4-dimethoxyphenyl)-1,3,3a,4,6,6a-hexahydrofuro[4,3-c]furan	Calmodulin	CALM1	P0DP23
SCP	8-Isopentenyl-kaempferol	Gamma-aminobutyric-acid receptor alpha-2 subunit	GABRA2	P47869
SCP	Marmesin	Androgen receptor	AR	P10275
SCP	8-Isopentenyl-kaempferol	Androgen receptor	AR	P10275
SCP	Marmesin	Beta-2 adrenergic receptor	ADRB2	P07550
SCP	(1R,3aS,4R,6aS)-1,4-bis(3,4-dimethoxyphenyl)-1,3,3a,4,6,6a-hexahydrofuro[4,3-c]furan	Alpha-1D adrenergic receptor	ADRA1D	P25100
SCP	(1R,3aS,4R,6aS)-1,4-bis(3,4-dimethoxyphenyl)-1,3,3a,4,6,6a-hexahydrofuro[4,3-c]furan	Alpha-1B adrenergic receptor	ADRA1B	P35368
SCP	Marmesin	mRNA of PKA Catalytic Subunit C-alpha	PRKACA	P17612
SNJ	Arginine	——	AZIN2	Q96A70
SNJ	Arginine	——	DDAH1	O94760
SNJ	Arginine	——	SLC7A4	O43246
SNJ	Arginine	——	NOS1	P29475
SNJ	Arginine	——	ASL	P04424
SNJ	Arginine	——	SLC7A3	Q8WY07
SNJ	Arginine	——	PADI4	Q9UM07
SNJ	Arginine	——	PADI6	Q6TGC4
SNJ	Arginine	——	PADI3	Q9ULW8
SNJ	Arginine	——	ASS1	P00966
SNJ	Arginine	——	NOS3	P29474
SNJ	Arginine	——	PADI1	Q9ULC6
SNJ	Arginine	——	PADI2	Q9Y2J8
SNJ	Arginine	——	SLC7A1	P30825
SNJ	Arginine	——	OTC	P00480
SNJ	Arginine	——	NOS2	P35228
SNJ	Arginine	——	DDAH2	O95865
SNJ	Arginine	——	ARG2	P78540
SNJ	Aspartic Acid	——	GOT2	P00505
SNJ	Aspartic Acid	——	ASNS	P08243
SNJ	Aspartic Acid	——	DARS	P14868
SNJ	Aspartic Acid	——	CAD	O76075
SNJ	Aspartic Acid	——	SUCLG2	Q96I99
SNJ	Aspartic Acid	——	GABRB1	P18505
SNJ	Aspartic Acid	——	TMLHE	Q9NVH6
SNJ	Aspartic Acid	——	PLOD1	Q02809
SNJ	Aspartic Acid	——	ALDH5A1	P51649
SNJ	Aspartic Acid	——	TARS2	Q9BW92
SNJ	Aspartic Acid	——	ACADSB	P45954
SNJ	Aspartic Acid	——	ALAD	P13716
SNJ	Aspartic Acid	——	LCMT2	O60294
SNJ	Aspartic Acid	——	SLC1A1	P43005
SNJ	Aspartic Acid	——	DARS2	Q6PI48
SNJ	Aspartic Acid	——	ASRGL1	Q7L266
SNJ	Aspartic Acid	——	ACY1	Q03154
SNJ	Aspartic Acid	——	SLC13A2	Q13183
SNJ	Aspartic Acid	——	SLC25A10	Q9UBX3
SNJ	Aspartic Acid	——	BCAT1	P54687
SNJ	Aspartic Acid	——	THNSL1	Q8IYQ7
SNJ	Aspartic Acid	——	BBOX1	O75936
SNJ	Aspartic Acid	——	LARS2	Q15031
SNJ	Aspartic Acid	——	PCCB	P05166
SNJ	Aspartic Acid	——	P4HA2	O15460
SNJ	Aspartic Acid	——	P3H1	Q32P28
SNJ	Aspartic Acid	——	ACY3	Q96HD9
SNJ	Aspartic Acid	——	GOT1	P17174
SNJ	Aspartic Acid	——	RNASE1	P07998
SNJ	Aspartic Acid	——	SLC25A13	Q9UJS0
SNJ	Aspartic Acid	——	SLC13A1	Q9BZW2
SNJ	Aspartic Acid	——	P3H3	Q8IVL6
SNJ	Aspartic Acid	——	VARS	P26640
SNJ	Aspartic Acid	——	SLC52A2	Q9HAB3
SNJ	Aspartic Acid	——	SDHB	P21912
SNJ	Aspartic Acid	——	PLOD3	O60568
SNJ	Aspartic Acid	——	P3H2	Q8IVL5
SNJ	Aspartic Acid	——	SUCLA2	Q9P2R7
SNJ	Aspartic Acid	——	ASPA	P45381
SNJ	Aspartic Acid	——	ASPH	Q12797
SNJ	Aspartic Acid	——	ASS1	P00966
SNJ	Aspartic Acid	——	LYZ	P61626
SNJ	Aspartic Acid	——	SUCLG1	P53597
SNJ	Aspartic Acid	——	OXCT2	Q9BYC2
SNJ	Aspartic Acid	——	TARS	P26639
SNJ	Aspartic Acid	——	SUCNR1	Q9BXA5
SNJ	Aspartic Acid	——	LARS	Q9P2J5
SNJ	Aspartic Acid	——	P4HA1	P13674
SNJ	Aspartic Acid	——	SDHA	P31040
SNJ	Aspartic Acid	——	BCAT2	O15382
SNJ	Aspartic Acid	——	ADSSL1	Q8N142
SNJ	Aspartic Acid	——	SLC25A12	O75746
SNJ	Aspartic Acid	——	ADSS	P30520
SNJ	Aspartic Acid	——	PAICS	P22234
SNJ	Aspartic Acid	——	HSD17B6	O14756
SNJ	Aspartic Acid	——	IARS2	Q9NSE4
SNJ	Aspartic Acid	——	LCMT1	Q9UIC8
SNJ	Aspartic Acid	——	SLC13A3	Q8WWT9
SNJ	Aspartic Acid	——	OXCT1	P55809
SNJ	Aspartic Acid	——	SDHC	Q99643
SNJ	Aspartic Acid	——	IARS	P41252
SNJ	Aspartic Acid	——	SDHD	O14521
SNJ	Alanine	——	GPT2	Q8TD30
SNJ	Alanine	——	AARS2	Q5JTZ9
SNJ	Alanine	——	SLC36A1	Q7Z2H8
SNJ	Alanine	——	CBSL	P0DN79
SNJ	Alanine	——	SLC1A5	Q15758
SNJ	Alanine	——	SLC1A1	P43005
SNJ	Alanine	——	ASPA	P45381
SNJ	Alanine	——	GCAT	O75600
SNJ	Alanine	——	VDAC3	Q9Y277
SNJ	Alanine	——	GRIN3B	O60391
SNJ	Alanine	——	GLRB	P48167
SNJ	Alanine	——	SLC25A12	O75746
SNJ	Alanine	——	NARS2	Q96I59
SNJ	Alanine	——	GLDC	P23378
SNJ	Alanine	——	GARS	P41250
SNJ	Alanine	——	SLC7A3	Q8WY07
SNJ	Alanine	——	KARS	Q15046
SNJ	Alanine	——	SLC7A1	P30825
SNJ	Alanine	——	PCCB	P05166
SNJ	Alanine	——	BCAT2	O15382
SNJ	Alanine	——	LCMT2	O60294
SNJ	Alanine	——	PCCA	P05165
SNJ	Alanine	——	TLR4	O00206
SNJ	Alanine	——	TFAP2B	Q92481
SNJ	Alanine	——	AMT	P48728
SNJ	Alanine	——	SLC38A7	Q9NVC3
SNJ	Alanine	——	ACOT8	O14734
SNJ	Alanine	——	TYMS	P04818
SNJ	Alanine	——	THNSL1	Q8IYQ7
SNJ	Alanine	——	TARS2	Q9BW92
SNJ	Alanine	——	BHMT2	Q9H2M3
SNJ	Alanine	——	CACNA2D2	Q9NY47
SNJ	Alanine	——	PTDSS1	P48651
SNJ	Alanine	——	PAH	P00439
SNJ	Alanine	——	DDAH1	O94760
SNJ	Alanine	——	GRIN3A	Q8TCU5
SNJ	Alanine	——	GSTP1	P09211
SNJ	Alanine	——	PADI1	Q9ULC6
SNJ	Alanine	——	ABCC2	Q92887
SNJ	Alanine	——	GPHN	Q9NQX3
SNJ	Alanine	——	AUH	Q13825
SNJ	Alanine	——	GAA	P10253
SNJ	Alanine	——	ADRB2	P07550
SNJ	Alanine	——	NRXN1	P58400
SNJ	Alanine	——	GART	P22102
SNJ	Alanine	——	AADAT	Q8N5Z0
SNJ	Alanine	——	SLC7A10	Q9NS82
SNJ	Alanine	——	TOMM40	O96008
SNJ	Alanine	——	NTSR1	P30989
SNJ	Alanine	——	IL1B	P01584
SNJ	Alanine	——	CYP11A1	P05108
SNJ	Alanine	——	DHODH	Q02127
SNJ	Alanine	——	MYLK2	Q9H1R3
SNJ	Alanine	——	MCCC1	Q96RQ3
SNJ	Alanine	——	TNNI3	P19429
SNJ	Alanine	——	MCCC2	Q9HCC0
SNJ	Alanine	——	TAF7	Q15545
SNJ	Alanine	——	SLC19A2	O60779
SNJ	Alanine	——	STIM1	Q13586
SNJ	Alanine	——	SLC25A5	P05141
SNJ	Alanine	——	GLYATL3	Q5SZD4
SNJ	Alanine	——	PRODH	O43272
SNJ	Alanine	——	SLC6A13	Q9NSD5
SNJ	Alanine	——	ANK3	Q12955
SNJ	Alanine	——	PCMT1	P22061
SNJ	Alanine	——	EZR	P15311
SNJ	Alanine	——	STAR	P25092
SNJ	Alanine	——	CRACR2A	Q9BSW2
SNJ	Alanine	——	UROS	P10746
SNJ	Alanine	——	GLRA4	Q5JXX5
SNJ	Alanine	——	SLC7A11	Q9UPY5
SNJ	Alanine	——	SMOX	Q9NWM0
SNJ	Alanine	——	GHR	P10912
SNJ	Alanine	——	EGLN1	Q9GZT9
SNJ	Alanine	——	PLCB1	Q9NQ66
SNJ	Alanine	——	CERS1	P27544
SNJ	Alanine	——	YARS2	Q9Y2Z4
SNJ	Alanine	——	HAP1	P27695
SNJ	Alanine	——	DTYMK	P23919
SNJ	Alanine	——	ATP8A2	Q9NTI2
SNJ	Alanine	——	ABAT	P80404
SNJ	Alanine	——	PHYKPL	Q8IUZ5
SNJ	Alanine	——	AGXT2	Q9BYV1
SNJ	Alanine	——	SPTLC2	O15270
SNJ	Alanine	——	GOT2	P00505
SNJ	Alanine	——	SLC7A2	P52569
SNJ	Alanine	——	IARS2	Q9NSE4
SNJ	Alanine	——	SLC38A3	Q99624
SNJ	Alanine	——	GSS	P48637
SNJ	Alanine	——	LCMT1	Q9UIC8
SNJ	Alanine	——	GLYAT	Q6IB77
SNJ	Alanine	——	GLYATL1	Q969I3
SNJ	Alanine	——	TNNC1	P63316
SNJ	Alanine	——	VDAC2	P45880
SNJ	Alanine	——	SHMT2	P34897
SNJ	Alanine	——	ASRGL1	Q7L266
SNJ	Alanine	——	LARS2	Q15031
SNJ	Alanine	——	ACADSB	P45954
SNJ	Alanine	——	OTC	P00480
SNJ	Alanine	——	ACY1	Q03154
SNJ	Alanine	——	PAICS	P22234
SNJ	Alanine	——	ASPG	Q86U10
SNJ	Alanine	——	ASNSD1	Q9NWL6
SNJ	Alanine	——	HCN3	Q9P1Z3
SNJ	Alanine	——	TYW5	A2RUC4
SNJ	Alanine	——	CTPS2	Q9NRF8
SNJ	Alanine	——	VARS2	Q5ST30
SNJ	Alanine	——	CSAD	Q9Y600
SNJ	Alanine	——	CARS	P49589
SNJ	Alanine	——	SLC19A3	Q9BZV2
SNJ	Alanine	——	CACNA1A	O00555
SNJ	Alanine	——	DGKG	P49619
SNJ	Alanine	——	MTR	Q99707
SNJ	Alanine	——	CACNA1B	Q00975
SNJ	Alanine	——	GRIN2B	Q13224
SNJ	Alanine	——	SMPD3	Q9NY59
SNJ	Alanine	——	GRIN2D	O15399
SNJ	Alanine	——	SCARB1	Q8WTV0
SNJ	Alanine	——	FBP1	P09467
SNJ	Alanine	——	CACNA1H	O95180
SNJ	Alanine	——	ARV1	Q9H2C2
SNJ	Alanine	——	MUT	P22033
SNJ	Alanine	——	AVPR1A	P37288
SNJ	Alanine	——	HOGA1	Q86XE5
SNJ	Alanine	——	PRLR	P16471
SNJ	Alanine	——	ZP4	Q12836
SNJ	Alanine	——	TK1	P04183
SNJ	Alanine	——	PAOX	Q6QHF9
SNJ	Alanine	——	RNASE4	P34096
SNJ	Alanine	——	RCAN3	Q9UKA8
SNJ	Alanine	——	PSPH	P78330
SNJ	Alanine	——	ENOPH1	Q9UHY7
SNJ	Alanine	——	SLC13A3	Q8WWT9
SNJ	Alanine	——	ALDH18A1	P54886
SNJ	Alanine	——	MOCS3	O95396
SNJ	Alanine	——	BBOX1	O75936
SNJ	Alanine	——	QPRT	Q15274
SNJ	Alanine	——	OPLAH	O14841
SNJ	Alanine	——	AARSD1	Q9BTE6
SNJ	Alanine	——	LEP	P41159
SNJ	Alanine	——	SLIT3	O75094
SNJ	Alanine	——	GAD1	Q99259
SNJ	Alanine	——	GLS	O94925
SNJ	Alanine	——	AFMID	Q63HM1
SNJ	Alanine	——	PSAT1	Q9Y617
SNJ	Alanine	——	EARS2	Q5JPH6
SNJ	Alanine	——	DLST	P36957
SNJ	Alanine	——	NUDT3	O95989
SNJ	Alanine	——	TNNT3	P45378
SNJ	Alanine	——	LRRK2	Q5S007
SNJ	Alanine	——	PI4K2A	Q9BTU6
SNJ	Alanine	——	CTNS	O60931
SNJ	Alanine	——	TMEM110	Q86TL2
SNJ	Alanine	——	KMO	O15229
SNJ	Alanine	——	MMAA	Q8IVH4
SNJ	Alanine	——	RNASE2	P10153
SNJ	Alanine	——	PARK2	O60260
SNJ	Alanine	——	HPRT1	P00492
SNJ	Alanine	——	NARFL	Q9H6Q4
SNJ	Alanine	——	SLC25A4	P12235
SNJ	Alanine	——	SLC7A8	Q9UHI5
SNJ	Alanine	——	GPT	P24298
SNJ	Alanine	——	KYNU	Q16719
SNJ	Alanine	——	SARS	P49591
SNJ	Alanine	——	BAAT	Q14032
SNJ	Alanine	——	GCSH	P23434
SNJ	Alanine	——	GLRA2	P23416
SNJ	Alanine	——	VARS	P26640
SNJ	Alanine	——	ASNS	P08243
SNJ	Alanine	——	GRIN2A	Q12879
SNJ	Alanine	——	ASPH	Q12797
SNJ	Alanine	——	GATM	P50440
SNJ	Alanine	——	DARS	P14868
SNJ	Alanine	——	OAZ2	O95190
SNJ	Alanine	——	ALAS2	P22557
SNJ	Alanine	——	GLYATL2	Q8WU03
SNJ	Alanine	——	RNASE1	P07998
SNJ	Alanine	——	SLC6A5	Q9Y345
SNJ	Alanine	——	GLUL	P15104
SNJ	Alanine	——	SLC25A13	Q9UJS0
SNJ	Alanine	——	NARS	O43776
SNJ	Alanine	——	AZIN2	Q96A70
SNJ	Alanine	——	SLC26A6	Q9BXS9
SNJ	Alanine	——	ALDH5A1	P51649
SNJ	Alanine	——	HLCS	P50747
SNJ	Alanine	——	HIF1AN	Q9NWT6
SNJ	Alanine	——	TNNT2	P45379
SNJ	Alanine	——	CDO1	Q16878
SNJ	Alanine	——	GCLM	P48507
SNJ	Alanine	——	MGMT	P16455
SNJ	Alanine	——	PADI3	Q9ULW8
SNJ	Alanine	——	METAP2	P50579
SNJ	Alanine	——	TAT	P17735
SNJ	Alanine	——	FARSA	Q9Y285
SNJ	Alanine	——	PTDSS2	Q9BVG9
SNJ	Alanine	——	DDAH2	O95865
SNJ	Alanine	——	ADORA1	P30542
SNJ	Alanine	——	SMPD4	Q9NXE4
SNJ	Alanine	——	DGAT2	Q96PD7
SNJ	Alanine	——	SLC6A1	P30531
SNJ	Alanine	——	ARPIN	Q7Z6K5
SNJ	Alanine	——	OSBPL8	Q9BZF1
SNJ	Alanine	——	IVD	P26440
SNJ	Alanine	——	GOT1L1	Q8NHS2
SNJ	Alanine	——	PFAS	O15067
SNJ	Alanine	——	SLC6A11	P48066
SNJ	Alanine	——	STIM2	Q9P246
SNJ	Alanine	——	CD101	Q93033
SNJ	Alanine	——	ACACA	Q13085
SNJ	Alanine	——	ADI1	Q9BV57
SNJ	Alanine	——	MTNR1B	P49286
SNJ	Alanine	——	CCBL2	Q6YP21
SNJ	Alanine	——	CAT	P04040
SNJ	Alanine	——	HMBS	P08397
SNJ	Alanine	——	RNASE8	Q8TDE3
SNJ	Alanine	——	APRT	P07741
SNJ	Alanine	——	WNT7B	P56706
SNJ	Alanine	——	CMPK2	Q5EBM0
SNJ	Alanine	——	MOCS2	O96007
SNJ	Alanine	——	MRI1	Q9BV20
SNJ	Alanine	——	PYCR1	P32322
SNJ	Alanine	——	PKLR	P30613
SNJ	Alanine	——	SLC11A1	P49279
SNJ	Alanine	——	SLC3A1	Q07837
SNJ	Alanine	——	TNNT1	P13805
SNJ	Alanine	——	HAAO	P46952
SNJ	Alanine	——	ATP1A2	P50993
SNJ	Alanine	——	CMPK1	P30085
SNJ	Alanine	——	RYR3	Q15413
SNJ	Alanine	——	C2orf83	Q53S99
SNJ	Alanine	——	SOD2	P04179
SNJ	Alanine	——	LCN2	P80188
SNJ	Alanine	——	ADSL	P30566
SNJ	Alanine	——	PYCRL	Q53H96
SNJ	Alanine	——	NAGS	Q8N159
SNJ	Alanine	——	MYBPC3	Q14896
SNJ	Alanine	——	FAH	P16930
SNJ	Alanine	——	ALDH4A1	P30038
SNJ	Alanine	——	TNNI2	P48788
SNJ	Alanine	——	MCEE	Q96PE7
SNJ	Alanine	——	NFS1	Q9Y697
SNJ	Alanine	——	AARS	P49588
SNJ	Alanine	——	CBS	P35520
SNJ	Alanine	——	SDS	P20132
SNJ	Alanine	——	OAZ3	Q9UMX2
SNJ	Alanine	——	PPAT	Q06203
SNJ	Alanine	——	ALAS1	P13196
SNJ	Alanine	——	SLC25A15	Q9Y619
SNJ	Alanine	——	GLRA3	O75311
SNJ	Alanine	——	GOT1	P17174
SNJ	Alanine	——	GPR18	Q14330
SNJ	Alanine	——	LARS	Q9P2J5
SNJ	Alanine	——	GRIN2C	Q14957
SNJ	Alanine	——	PIPOX	Q9P0Z9
SNJ	Alanine	——	VDAC1	P21796
SNJ	Alanine	——	SLC32A1	Q9H598
SNJ	Alanine	——	ASS1	P00966
SNJ	Alanine	——	SLC7A4	O43246
SNJ	Alanine	——	ARG2	P78540
SNJ	Alanine	——	GLRA1	P23415
SNJ	Alanine	——	PCK1	P35558
SNJ	Alanine	——	GAMT	Q14353
SNJ	Alanine	——	ISCU	Q9H1K1
SNJ	Alanine	——	BACE1	P56817
SNJ	Alanine	——	SLC1A3	P43003
SNJ	Alanine	——	CPS1	P31327
SNJ	Alanine	——	PISD	Q9UG56
SNJ	Alanine	——	GCLC	P48506
SNJ	Alanine	——	CARS2	Q9HA77
SNJ	Alanine	——	CACNA2D1	P54289
SNJ	Alanine	——	MTRR	Q9UBK8
SNJ	Alanine	——	PADI2	Q9Y2J8
SNJ	Alanine	——	PLG	P00747
SNJ	Alanine	——	PRKCA	P17252
SNJ	Alanine	——	ATP8A1	Q9Y2Q0
SNJ	Alanine	——	PADI4	Q9UM07
SNJ	Alanine	——	NOS1	P29475
SNJ	Alanine	——	GRIN1	Q05586
SNJ	Alanine	——	ACAT2	O75908
SNJ	Alanine	——	TBPL1	P62380
SNJ	Alanine	——	RARS	P54136
SNJ	Alanine	——	PCMTD2	Q9NV79
SNJ	Alanine	——	ACACB	O00763
SNJ	Alanine	——	TMLHE	Q9NVH6
SNJ	Alanine	——	SLC7A9	P82251
SNJ	Alanine	——	MOCOS	Q96EN8
SNJ	Alanine	——	PKD2	Q13563
SNJ	Alanine	——	ALDH9A1	P49189
SNJ	Alanine	——	ARMT1	Q9H993
SNJ	Alanine	——	NT5M	Q9NPB1
SNJ	Alanine	——	BAK1	Q16611
SNJ	Alanine	——	TOMM40L	Q969M1
SNJ	Alanine	——	ACAT1	P24752
SNJ	Alanine	——	SLC36A2	Q495M3
SNJ	Alanine	——	DAO	P14920
SNJ	Alanine	——	ACADS	P16219
SNJ	Alanine	——	TRPM1	Q7Z4N2
SNJ	Alanine	——	SLC28A3	Q9HAS3
SNJ	Alanine	——	JUN	P05412
SNJ	Alanine	——	AKR1B1	P15121
SNJ	Alanine	——	HADHA	P40939
SNJ	Alanine	——	NIT2	Q9NQR4
SNJ	Alanine	——	ATIC	P31939
SNJ	Alanine	——	HIF1A	Q16665
SNJ	Alanine	——	MTOR	P42345
SNJ	Alanine	——	DHFR	P00374
SNJ	Alanine	——	ATP13A2	Q9NQ11
SNJ	Alanine	——	MYO5A	Q9Y4I1
SNJ	Alanine	——	EPRS	P07814
SNJ	Alanine	——	RAB8B	Q92930
SNJ	Alanine	——	ACADM	P11310
SNJ	Alanine	——	DPYSL2	Q16555
SNJ	Alanine	——	STAT5B	P51692
SNJ	Alanine	——	ZP3	P21754
SNJ	Alanine	——	GAD2	Q05329
SNJ	Alanine	——	KDM6B	O15054
SNJ	Alanine	——	SLC36A3	Q495N2
SNJ	Alanine	——	MOCS1	Q9NZB8
SNJ	Alanine	——	GLS2	Q9UI32
SNJ	Alanine	——	SLC1A4	P43007
SNJ	Alanine	——	AGXT	P21549
SNJ	Alanine	——	SPTLC1	O15269
SNJ	Alanine	——	SRR	Q9GZT4
SNJ	Alanine	——	SHMT1	P34896
SNJ	Alanine	——	ACY3	Q96HD9
SNJ	Alanine	——	BCAT1	P54687
SNJ	Alanine	——	ADSSL1	Q8N142
SNJ	Alanine	——	DARS2	Q6PI48
SNJ	Alanine	——	GNMT	Q14749
SNJ	Alanine	——	CTPS1	P17812
SNJ	Alanine	——	ARG1	P05089
SNJ	Alanine	——	OAT	P04181
SNJ	Alanine	——	SLC25A2	Q9BXI2
SNJ	Alanine	——	SLC6A9	P48067
SNJ	Alanine	——	OAZ1	P54368
SNJ	Alanine	——	ADSS	P30520
SNJ	Alanine	——	CAD	O76075
SNJ	Alanine	——	IARS	P41252
SNJ	Alanine	——	LYZ	P61626
SNJ	Alanine	——	CCBL1	Q16773
SNJ	Alanine	——	ASL	P04424
SNJ	Alanine	——	SLC1A2	P43004
SNJ	Alanine	——	ICMT	O60725
SNJ	Alanine	——	TDO2	P48775
SNJ	Alanine	——	LGSN	Q5TDP6
SNJ	Alanine	——	FXN	Q16595
SNJ	Alanine	——	TARS	P26639
SNJ	Alanine	——	CTH	P32929
SNJ	Alanine	——	PLAT	P00750
SNJ	Alanine	——	TH	P07101
SNJ	Alanine	——	NOS2	P35228
SNJ	Alanine	——	FARS2	O95363
SNJ	Alanine	——	BHMT	Q93088
SNJ	Alanine	——	FARSB	Q9NSD9
SNJ	Alanine	——	NOS3	P29474
SNJ	Alanine	——	PADI6	Q6TGC4
SNJ	Alanine	——	DGKD	Q16760
SNJ	Alanine	——	AIMP1	Q12904
SNJ	Alanine	——	APIP	Q96GX9
SNJ	Alanine	——	KLF9	Q13886
SNJ	Alanine	——	ACMSD	Q8TDX5
SNJ	Alanine	——	MTAP	Q13126
SNJ	Alanine	——	GRM6	O15303
SNJ	Alanine	——	STAT5A	P42229
SNJ	Alanine	——	HTR2B	P41595
SNJ	Alanine	——	SLC22A6	Q4U2R8
SNJ	Alanine	——	AMDHD1	Q96NU7
SNJ	Alanine	——	KCNA1	Q09470
SNJ	Alanine	——	SLIT2	O94813
SNJ	Alanine	——	SDSL	Q96GA7
SNJ	Alanine	——	HMGCL	P35914
SNJ	Alanine	——	PQLC2	Q6ZP29
SNJ	Alanine	——	PLCG2	P16885
SNJ	Alanine	——	PHGDH	O43175
SNJ	Alanine	——	TNNI3K	Q59H18
SNJ	Alanine	——	SLC28A1	O00337
SNJ	Alanine	——	PCMTD1	Q96MG8
SNJ	Alanine	——	DPYS	Q14117
SNJ	Alanine	——	AVP	P01185
SNJ	Alanine	——	DDO	Q99489
SNJ	Alanine	——	DUT	P33316
SNJ	Alanine	——	HCRT	O43612
SNJ	Alanine	——	UROD	P06132
SNJ	Alanine	——	NFKBIE	O00221
SNJ	Alanine	——	AQP9	O14520
SNJ	Alanine	——	SLC7A7	Q9UM01
SNJ	Alanine	——	HTT	P42858
SNJ	Alanine	——	UMPS	P11172
SNJ	Alanine	——	SLC1A6	P48664
SNJ	Alanine	——	FH	P07954
SNJ	Alanine	——	PYCR2	Q96C36
SNJ	Alanine	——	AZIN1	O14977
SNJ	Alanine	——	SLC6A12	P48065
SNJ	Alanine	——	FAHD1	Q6P587
SNJ	Alanine	——	AASS	Q9UDR5
SNJ	Alanine	——	THNSL2	Q86YJ6
SNJ	Alanine	——	GRM7	Q14831
SNJ	Alanine	——	PER2	O15055
SQ	ginsenoside rh2	Apoptosis regulator BAX	BAX	Q07812
SQ	ginsenoside rh2	Caspase-3	CASP3	P42574
SQ	ginsenoside rh2	NF-kappa-B inhibitor alpha	CHUK	O15111
SQ	ginsenoside rh2	Caspase-1	CASP1	P29466
SQ	ginsenoside rh2	Proteasome assembly chaperone 1	PSMG1	O95456
SQ	ginsenoside rh2	Dual specificity mitogen-activated protein kinase kinase 4	MAP2K4	P45985
SQ	ginsenoside rh2	Solute carrier family 2, facilitated glucose transporter member 4	SLC2A4	P14672
SQ	ginsenoside rh2	Tumor necrosis factor	TNF	P01375
SQ	DFV	Sodium-dependent serotonin transporter	SLC6A4	P31645
SQ	Diop	Sodium channel protein type 5 subunit alpha	SCN5A	Q14524
SQ	DFV	Retinoic acid receptor RXR-alpha	RXRA	P19793
SQ	Mandenol	Prostaglandin G/H synthase 2	PTGS2	P35354
SQ	DFV	Prostaglandin G/H synthase 2	PTGS2	P35354
SQ	ginsenoside rh2	Prostaglandin G/H synthase 2	PTGS2	P35354
SQ	Mandenol	Prostaglandin G/H synthase 1	PTGS1	P23219
SQ	DFV	Prostaglandin G/H synthase 1	PTGS1	P23219
SQ	DFV	cAMP-dependent protein kinase inhibitor alpha	PKIA	P61925
SQ	DFV	Phosphatidylinositol-4,5-bisphosphate 3-kinase catalytic subunit, gamma isoform	PIK3CG	P48736
SQ	Mandenol	Nuclear receptor coactivator 2	NCOA2	Q15596
SQ	DFV	Amine oxidase [flavin-containing] B	MAOB	P27338
SQ	ginsenoside rh2	Interleukin-1 beta	IL1B	P01584
SQ	ginsenoside rh2	Interferon gamma	IFNG	P01579
SQ	DFV	Heat shock protein HSP 90	HSP90AB1	P08238
SQ	DFV	Beta-lactamase	LACTB2	Q53H82
SQ	DFV	Estrogen receptor	ESR1	P03372
SQ	Diop	Muscarinic acetylcholine receptor M3	CHRM3	P20309
SQ	DFV	Beta-2 adrenergic receptor	ADRB2	P07550
SQ	Diop	Beta-2 adrenergic receptor	ADRB2	P07550
SQ	ginsenoside rh2	Pituitary adenylate cyclase-activating polypeptide	ADCYAP1	P18509
SQ	DFV	mRNA of PKA Catalytic Subunit C-alpha	PRKACA	P17612

## Sheet: Table S3 预测表格整理
Table S3.Potential Targets Obtained through SwissTargetPrediction database
Herb	Compound	Target
CS	Lactiflorin	LGALS9,LGALS3,LGALS9B,LGALS9C,PTAFR,TDP1,PRKCG,PRKCB,PRKCA,PRKCQ,PRKCD,CRYZ,GLRA3,GLRA1,GLRA2
CS	Paeoniflorigenone	SLC6A2,SLC6A3,SLC6A4,SLC6A9,SLC6A7,SLC6A14,SLC6A5,MAPT,ABCB1,ABCB11,ABCB4,ABCB5,PTAFR,PRKCG,PRKCB
CS	Albiflorin	LGALS9,LGALS3,LGALS9B,LGALS9C,PTAFR,PRKCG,PRKCB,PRKCA,PRKCQ,PRKCD,ABCB1,ABCB11,ABCB4,ABCB5,TDP1
CS,MDP	benzoyl paeoniflorin	LGALS3,TDP1,LGALS9,LGALS9B,LGALS9C,F10,F9,F7,PTPN2,PTPN1,SQLE,F2,ABCB1,ABCB11,ABCB4,LGALS3,LGALS9,LGALS9B,LGALS9C,TDP1,SSTR1,SSTR2,SSTR4,SSTR3,SSTR5,F2,F10,F9,F7,PTAFR
CS	evofolinB	TDP1,DYRK1A,MAPT,PTGS1,PTGS2,ESR1,ESR2,MBNL1,MBNL2,MBNL3,EGFR,ERBB2,ERBB3,ERBB4,NR3C1
CS,MDP	paeoniflorin_qt	LGALS9,LGALS3,LGALS9B,LGALS9C,SLC6A2,SLC6A9,SLC6A3,SLC6A4,SLC6A7,SLC6A14,SLC6A5,TDP1,RYR1,RYR3,LCE3A,LGALS9,LGALS3,LGALS9B,LGALS9C,SLC6A2,SLC6A9,SLC6A3,SLC6A4,SLC6A7,SLC6A14,SLC6A5,TDP1,RYR1,RYR3,LCE3A
CS	(1S,2S,4R)-trans-2-hydroxy-1,8-cineole-B-D-glucopyranoside	CDK1,CDK2,CDK4,CDK3,CDK6,CHRM1,CHRM2,CHRM4,CHRM5,CHRM3,MBNL1,MBNL2,MBNL3,LGALS3,MAPT
CS	1-o-beta-d-glucopyranosyl-8-o-benzoylpaeonisuffrone_qt	ABCB1,ABCB11,ABCB4,ABCB5,AR,SLC6A2,SLC6A3,MAPT,PTAFR,PTGS1,PTGS2,SLC6A4,SLC6A9,SLC6A7,SLC6A14
CS	1-o-beta-d-glucopyranosylpaeonisuffrone_qt	ABCB1,ABCB11,ABCB4,ABCB5,MAPT,AR,PTAFR,SLC6A2,SLC6A3,FDFT1,GLRA3,GLRA1,GLRA2,GLRA4,GLRB
CS	Albiflorin_qt	ABCB1,ABCB11,ABCB4,ABCB5,SLC6A2,SLC6A3,AR,PTAFR,PRKCG,PRKCB,PRKCA,PRKCQ,PRKCD,BCHE,ACHE
CS	4-ethyl-paeoniflorin_qt	ABCB1,ABCB11,ABCB4,ABCB5,SLC6A2,SLC6A4,SLC6A3,SLC6A9,SLC6A7,SLC6A14,SLC6A5,PTAFR,MBNL1,MBNL2,MBNL3
CS	4-o-methyl-paeoniflorin_qt	ABCB1,ABCB11,ABCB4,ABCB5,PTAFR,SLC6A2,SLC6A4,SLC6A3,SLC6A9,SLC6A7,SLC6A14,SLC6A5,TDP1,MAPT,BCHE
CS	8-debenzoylpaeonidanin	TDP1,MBNL1,MBNL2,MBNL3,ADRA2A,CYP2D6,DRD2,ADRA2B,ADRA2C,DRD1,ADRA1D,HTR2A,HTR2C,DRD3,HTR2B
CS	9-ethyl-neo-paeoniaflorin A_qt	ABCB1,ABCB11,ABCB4,ABCB5,SLC6A2,SLC6A3,AR,PTAFR,MAPT,SLC6A4,SLC6A9,SLC6A7,SLC6A14,SLC6A5,TDP1
CS	isobenzoylpaeoniflorin	LGALS9,LGALS3,LGALS9B,LGALS9C,ABCB1,ABCB4,ABCB11,ABCB5,SSTR1,SSTR2,SSTR4,SSTR3,SSTR5,TDP1,PTAFR
DaH	Mutatochrome	ALOX5,LTA4H,ALOX15,P18054,ALOX15B,O75342,ALOXE3,VDR,HIF1A,EPAS1,MAPT,TDP1,PTAFR,PPARG,PPARD
DaH	Sennoside E_qt	KDM4A,TNNT2&TNNC1&TNNI3,TDP1,KDM4B,KDM4C,ESR1,ESR2,PTPN2,PTPN1,ELANE,AZU1,PRTN3,SLC5A1,SLC5A2,SLC5A4
DaH	Emodin-1-O-beta-D-glucopyranoside	ESR1,ESR2,TDP1,MAPT,SLC5A1,SLC5A2,SLC5A4,SLC5A10,SLC5A3,SLC5A9,SLC5A11,SLC28A3,SLC28A1,SLC28A2,TYR
DaH	Sennoside D_qt	KDM4A,TNNT2&TNNC1&TNNI3,TDP1,KDM4B,KDM4C,ESR1,ESR2,MBNL1,MBNL2,MBNL3,FYN,SRC,YES1,FGR,FRK
DaH	palmidin A	MAPT,MBNL1,MBNL2,MBNL3,TDP1,CSNK2A2,CSNK2A1,CSNK2A3,ESR1,ESR2,DYRK1A,ELANE,AZU1,PRTN3,LCK
DaH	Procyanidin B-5,3'-O-gallate	SQLE,MMP2,MMP9,BACE1,BACE2,MAPT,TDP1,MMP14,MMP15,TERT,DHFR,MET,MAPK9,PGD,KCNH2
DiH	Stachyose	CDK1,CDK4,CDK2,CDK3,CDK6,CHRM1,CHRM2,CHRM4,CHRM5,CHRM3,FGF1,FGF2,VEGFA,HPSE,HPSE2
MDP	4-O-methylpaeoniflorin_qt	ABCB1,ABCB11,ABCB4,ABCB5,PTAFR,SLC6A2,SLC6A4,SLC6A3,SLC6A9,SLC6A7,SLC6A14,SLC6A5,TDP1,MAPT,BCHE
MDP	mudanpioside-h_qt 2	ABCB1,ABCB11,ABCB4,ABCB5,TDP1,MAPT,DYRK1A,RYR1,RYR3,LCE3A,RYR2,PTPN2,PTPN1,SLC5A1,SLC5A2
MDP	paeonidanin_qt	SLC6A2,SLC6A3,AR,ABCB1,ABCB11,ABCB4,ABCB5,OPRM1,OPRD1,OPRK1,OPRL1,SLC6A4,SLC6A9,SLC6A7,SLC6A14
SQ	ginsenoside f2	STAT3,STAT1,STAT2,STAT4,PTAFR,FGF1,FGF2,VEGFA,HPSE,HPSE2,CHRM5,CHRM1,CHRM3,CHRM2,CHRM4
SQ	ginsenoside rb1	STAT3,STAT1,STAT2,STAT4,FGF1,FGF2,VEGFA,HPSE,HPSE2,CHRM5,CHRM1,CHRM3,CHRM2,CHRM4,MAPT,STAT3,STAT1,STAT2,STAT4,CHRM2,CHRM4,CHRM5,CHRM1,CHRM3,MAPT,MBNL1,MBNL2,MBNL3,FGF1,FGF2,STAT3,STAT1,STAT2,STAT4,CHRM5,CHRM1,CHRM3,CHRM2,CHRM4,MBNL1,MBNL2,MBNL3,DRD1,DRD5,KDR
SQ	notoginsenosider1	STAT3,STAT1,STAT2,STAT4,CHRM2,CHRM4,CHRM5,CHRM1,CHRM3,MAPT,CDK1,CDK2,CDK4,CDK3,CDK6
