# Supplementary material for: Synergistic Network Pharmacology for Traditional Chinese Medicine Liangxue Tongyu Formula in Acute Intracerebral Hemorrhagic Stroke
Source: Neural Plast. 2021 Feb 26;2021:8874296. doi: 10.1155/2021/8874296 (PMC7936909; doi:10.1155/2021/8874296)
Supplement: Supplementary Materials — S1 Table. 517 compounds of 8 herbs in LXTYF collected from TCMSP and BATMAN-TCM database. S2 Table. 874 targets of the active ingredients obtained from the TCMSP. S3 Table. 149 targets of active components predicted from the SwissTargetPrediction database. S4 Table. 2315 targets relating to ICH collected from GAD, Genecards, and DisGeNET database. S5 Table. Topological parameters of component-target network. S6 Table. Proteins-proteins interaction information of LXTYF targets for AICH in STRING 11.0. S7 Table. Topological parameters of the PPI network. S8 Table. Results of putative targets for KEGG pathway enrichment analysis. S9 Table. Detailed information of 583 differentially expressed mRNAs identified between MGT and MG. S10 Table. Details of the Herb-Compound-Target-Pathway(H-C-T-P) network connection verified in RNA-seq. [file 8874296.f1.zip › Supplementary Table S1-S10/S4 Table.xlsx]

## Sheet: Table S4
Table S4. Candidate Target Relating to Cerebral Hemorrhage
Targets for Cerebral Hemorrhage
MMP2 KCNMA1 XDH EDN1 HSPB1 IGF1 CYCS NOS2 CCNB1 SOD2 BAK1 MET MTNR1B LEP OXT BRCA1 CYP2D6 PRKCB ELANE COL1A1 GSS FOXP3 SSTR2 BIRC5 MTRR BHMT MAOA APOE ALDH2 CDK1 SHBG BCHE BCL2 KL DNMT3B ADRA2A ALAD ASS1 F7 CYP1A1 RYR1 OXTR SARS EZR OPRK1 FGF1 CRP PCCB GSTP1 STAT5A SLC3A1 MTR DHFR ATP1A1 NFE2L2 GAA BTK NPPA CYP19A1 GC ADRB1 TNF C5 EGF IL1A FYN ABCC2 SHH CASP1 SPP1 TNNT2 MIP F2 WNT5A PTGS2 SDHD NC…
