# Supplementary material for: Synergistic Network Pharmacology for Traditional Chinese Medicine Liangxue Tongyu Formula in Acute Intracerebral Hemorrhagic Stroke
Source: Neural Plast. 2021 Feb 26;2021:8874296. doi: 10.1155/2021/8874296 (PMC7936909; doi:10.1155/2021/8874296)
Supplement: Supplementary Materials — S1 Table. 517 compounds of 8 herbs in LXTYF collected from TCMSP and BATMAN-TCM database. S2 Table. 874 targets of the active ingredients obtained from the TCMSP. S3 Table. 149 targets of active components predicted from the SwissTargetPrediction database. S4 Table. 2315 targets relating to ICH collected from GAD, Genecards, and DisGeNET database. S5 Table. Topological parameters of component-target network. S6 Table. Proteins-proteins interaction information of LXTYF targets for AICH in STRING 11.0. S7 Table. Topological parameters of the PPI network. S8 Table. Results of putative targets for KEGG pathway enrichment analysis. S9 Table. Detailed information of 583 differentially expressed mRNAs identified between MGT and MG. S10 Table. Details of the Herb-Compound-Target-Pathway(H-C-T-P) network connection verified in RNA-seq. [file 8874296.f1.zip › Supplementary Table S1-S10/S5 Table.xlsx]

## Sheet: Sheet1
Table S5.Topological analysis of compound-target network
Herb	Node	Degree	Betweenness centrality
MDP/SQ	quercetin	112	0.36959
SNJ	Alanine	104	0.417978
MDP/SCP	kaempferol	39	0.068758
DaH	emodin	29	0.0454465
DL/SNJ	Guanidine	27	0.0890794
DL	Xanthinin	25	0.0839679
DL	Xanthine	24	0.0878974
CS	baicalein	23	0.023182
CS/MDP	paeonol	20	0.0242996
CS/DaH/SQ	beta-sitosterol	20	0.0279194
DL	Guanosine	19	0.0600526
SCP	8-Isopentenyl-kaempferol	18	0.0260877
DaH	aloe-emodin	18	0.0196008
CS/DaH/SQ	Stigmasterol	18	0.0389419
DL/SNJ	Cholesterol	16	0.050011
CS	ellagicacid	15	0.0179013
SNJ	AsparticAcid	13	0.0312085
SCP	Marmesin	13	0.0165369
DL/SNJ	4-Guanidino-1-Butanol	12	0.0370579
DaH	EUPATIN	12	0.0116836
CS/MDP	benzoylpaeoniflorin	12	0.0169424
CS	Albiflorin_qt	12	0.0149345
SQ	ginsenosiderb1	11	0.0153187
SQ	ginsenosiderh2	10	0.0155211
CS	1-o-beta-d-glucopyranosyl-8-o-benzoylpaeonisuffrone_qt	10	0.00756521
CS	evofolinB	10	0.0144339
SQ	DFV	9	0.005099
SQ	notoginsenosider1	9	0.00950678
SQ	ginsenosidef2	9	0.0087669
DaH	Mutatochrome	9	0.0191967
DaH	ProcyanidinB-5,3'-O-gallate	9	0.0230025
DaH	Physcion	9	0.00252841
CS	Albiflorin	9	0.00983057
MDP	4-O-methylpaeoniflorin_qt	8	0.0017073
MDP	paeonidanin_qt	8	0.00648872
DiH	Stachyose	8	0.00668771
CS	4-o-methyl-paeoniflorin_qt	8	0.0017073
CS	9-ethyl-neo-paeoniaflorinA_qt	8	0.00303428
CS	Paeoniflorigenone	8	0.00177433
DaH	Toralactone	7	0.00428812
CS	1-o-beta-d-glucopyranosylpaeonisuffrone_qt	7	0.0026487
CS	isobenzoylpaeoniflorin	7	0.001631
CS	Lactiflorin	7	0.00632431
SNJ	Arginine	6	0.00190117
DaH	palmidinA	6	0.010557
DaH	(-)-catechin	6	0.00214042
CS/MDP	(+)-catechin	6	0.00516767
CS/MDP	paeoniflorin_qt	6	0.00392137
CS	4-ethyl-paeoniflorin_qt	6	0.00042117
CS	(1S,2S,4R)-trans-2-hydroxy-1,8-cineole-B-D-glucopyranoside	6	0.00365825
MDP	mudanpioside-h_qt2	5	0.0021964
DaH	rhein	5	0.00079495
DaH	SennosideE_qt	5	0.00467333
MDP	5-[[5-(4-methoxyphenyl)-2-furyl]methylene]barbituricacid	4	0.00157937
DiH	catalpol	4	9.189e-05
DaH	SennosideD_qt	4	0.00500756
DaH	Emodin-1-O-beta-D-glucopyranoside	4	0.00203475
DaH	Crysophanol	4	3.509e-05
CS	8-debenzoylpaeonidanin	4	0.0133332
CS	paeoniflorin	4	0.00892285
CS	(2R,3R)-4-methoxyl-distylin	4	0.00181503
SQ	Mandenol	2	1.94e-06
SCP	(1R,3aS,4R,6aS)-1,4-bis(3,4-dimethoxyphenyl)-1,3,3a,4,6,6a-hexahydrofuro[4,3-c]furan	2	6.297e-05
CS/DiH/MDP	sitosterol	2	0.00017719
CS	Baicalin	2	0.00015628
CS	Spinasterol	2	0.00017719
SQ	Diop	1	0
SCP	Cycloartenol	1	0
MDP	Mairin	1	0
DL	Hyrcanoside	1	0
DiH	acteoside	1	0
DaH	Daucosterol_qt	1	0
DaH	Physciondiglucoside	1	0
DaH	Torachrysone-8-O-beta-D-(6'-oxayl)-glucoside	1	0
CS	campest-5-en-3beta-ol	1	0
CS	stigmast-7-en-3-ol	1	0
Target	PTGS2	24	0.0339233
Target	PTGS1	21	0.0243207
Target	ESR1	17	0.047431
Target	MAPT	15	0.0240504
Target	PRKACA	15	0.0125587
Target	AR	14	0.0546651
Target	PTAFR	14	0.0100079
Target	ABCB1	13	0.00473496
Target	ABCB11	13	0.00473496
Target	PGR	13	0.0428691
Target	SLC6A2	13	0.013806
Target	PIK3CG	12	0.00597354
Target	SLC6A3	12	0.00778408
Target	SLC6A4	11	0.00654329
Target	ADRB2	9	0.0627083
Target	BAX	8	0.0159471
Target	CASP3	8	0.0052362
Target	ESR2	8	0.0105208
Target	F10	8	0.0115522
Target	PRKCA	8	0.0782737
Target	RXRA	8	0.0124988
Target	TOP2A	8	0.0113589
Target	CDK2	7	0.00778363
Target	DPP4	7	0.00372599
Target	F7	7	0.00821191
Target	TNF	7	0.0127963
Target	BCL2	6	0.00292224
Target	F2	6	0.00701019
Target	IL1B	6	0.0620561
Target	LGALS3	6	0.00259308
Target	NOS2	6	0.0172986
Target	PPARG	6	0.00483464
Target	PRKCB	6	0.00597885
Target	PRKCD	6	0.00681975
Target	VEGFA	6	0.0175477
Target	AKR1B1	5	0.0239688
Target	JUN	5	0.0253721
Target	LGALS9	5	0.0011192
Target	MAOB	5	0.00253134
Target	MMP9	5	0.00770693
Target	NOS3	5	0.0253414
Target	NR3C2	5	0.0069026
Target	PRSS1	5	0.00187501
Target	PTPN1	5	0.00307883
Target	RELA	5	0.00156607
Target	STAT1	5	0.0172849
Target	ADORA1	4	0.0416543
Target	ADRA2A	4	0.0189754
Target	AKT1	4	0.00110277
Target	CDKN1A	4	0.00111541
Target	CHUK	4	0.00187003
Target	CYP1A1	4	0.0143084
Target	GSTP1	4	0.0255989
Target	HIF1A	4	0.0250621
Target	ICAM1	4	0.0052048
Target	KDR	4	0.00270597
Target	PPARD	4	0.0235319
Target	TGFB1	4	0.010288
Target	TP53	4	0.0009519
Target	VDR	4	0.00860766
Target	ACHE	3	0.00128594
Target	ACY1	3	0.01187
Target	ADRB1	3	0.00127736
Target	ALOX5	3	0.00155801
Target	ASS1	3	0.00615686
Target	BCHE	3	0.00014905
Target	CAT	3	0.00803328
Target	CCNB1	3	0.00044822
Target	CDK1	3	0.0001108
Target	CDK4	3	0.0001108
Target	CDK6	3	0.0001108
Target	CHRNA7	3	0.0011223
Target	CYP3A4	3	0.00683306
Target	FGF1	3	0.00012776
Target	FGF2	3	0.00012776
Target	GSTM1	3	0.00047608
Target	HPSE	3	0.00012776
Target	IGF2	3	0.00044937
Target	MMP1	3	0.00068715
Target	MMP2	3	0.00460814
Target	MYC	3	0.00061445
Target	NOS1	3	0.00927402
Target	PRKCQ	3	4.073e-05
Target	STAT2	3	9.724e-05
Target	STAT3	3	9.724e-05
Target	STAT4	3	9.724e-05
Target	ACADSB	2	0.00522526
Target	ADH1C	2	0.00575497
Target	BACE1	2	0.00514276
Target	CASP8	2	0.00035902
Target	CASP9	2	0.00035902
Target	CXCL8	2	0.00022753
Target	CYP1A2	2	0.00018536
Target	DDAH2	2	0.00025237
Target	DHFR	2	0.00514276
Target	DRD5	2	0.00379339
Target	EGF	2	0.00034443
Target	EGFR	2	0.0010234
Target	EGLN1	2	0.00423354
Target	ELANE	2	3.19e-05
Target	ERBB2	2	0.0010234
Target	ERBB3	2	0.0010234
Target	FASN	2	6.066e-05
Target	FOS	2	0.00016652
Target	GRIN2A	2	0.00382794
Target	GSK3B	2	5.208e-05
Target	HMOX1	2	0.00018536
Target	IFNG	2	0.00061373
Target	IL10	2	0.00554812
Target	IL2	2	0.0004401
Target	IL6	2	0.00381061
Target	LEP	2	0.00382794
Target	LYZ	2	0.00522526
Target	MAOA	2	5.362e-05
Target	MAPK1	2	0.0004401
Target	MGMT	2	0.00821365
Target	MMAA	2	0.00821365
Target	MPI	2	6.695e-05
Target	MPO	2	0.00016652
Target	MTR	2	0.00821365
Target	MTRR	2	0.00821365
Target	OPRM1	2	0.00035104
Target	OTC	2	0.00025237
Target	PCCB	2	0.00522526
Target	PLAT	2	0.0133993
Target	PLAU	2	0.00077268
Target	PON1	2	0.00035902
Target	PRKCE	2	4.81e-05
Target	PRTN3	2	3.19e-05
Target	PTEN	2	0.0004401
Target	RYR1	2	4.304e-05
Target	SELE	2	0.00018536
Target	SHBG	2	0.00154286
Target	SLC25A13	2	0.00522526
Target	SOD1	2	0.00050751
Target	SRC	2	0.00056665
Target	SSTR1	2	6.207e-05
Target	SSTR2	2	6.207e-05
Target	TCF3	2	0.00780006
Target	TSPO	2	0.00154286
Target	TYR	2	0.00037814
Target	VCAM1	2	0.00018536
Target	XDH	2	0.00018536
Target	ABCC2	1	0
Target	ABCG2	1	0
Target	ACADM	1	0
Target	ACADS	1	0
Target	ACPP	1	0
Target	ACTA2	1	0
Target	ADAM17	1	0
Target	ADCYAP1	1	0
Target	ADH1B	1	0
Target	ADORA2A	1	0
Target	ADORA3	1	0
Target	AIMP1	1	0
Target	ALAD	1	0
Target	ALAS2	1	0
Target	ALDH2	1	0
Target	ALDH3A1	1	0
Target	ALDH9A1	1	0
Target	ALOX12	1	0
Target	ALOX15	1	0
Target	APOE	1	0
Target	APRT	1	0
Target	ARG1	1	0
Target	ARRB1	1	0
Target	ASCL1	1	0
Target	ATP1A1	1	0
Target	AVP	1	0
Target	B4GALT1	1	0
Target	BAK1	1	0
Target	BCL2L1	1	0
Target	BHMT	1	0
Target	BIRC5	1	0
Target	BRCA1	1	0
Target	BTK	1	0
Target	C5	1	0
Target	CACNA1A	1	0
Target	CACNA1D	1	0
Target	CALCA	1	0
Target	CASP1	1	0
Target	CAV1	1	0
Target	CBS	1	0
Target	CCL2	1	0
Target	CCNA2	1	0
Target	CCND1	1	0
Target	CD14	1	0
Target	CD34	1	0
Target	CD40LG	1	0
Target	CDKN2A	1	0
Target	COL1A1	1	0
Target	COL3A1	1	0
Target	COL5A1	1	0
Target	CPS1	1	0
Target	CRLF1	1	0
Target	CRP	1	0
Target	CSF2	1	0
Target	CSNK2A1	1	0
Target	CTH	1	0
Target	CTSD	1	0
Target	CX3CR1	1	0
Target	CXCL10	1	0
Target	CXCL11	1	0
Target	CXCL2	1	0
Target	CYCS	1	0
Target	CYP19A1	1	0
Target	CYP27A1	1	0
Target	CYP27B1	1	0
Target	CYP2D6	1	0
Target	CYP2E1	1	0
Target	DAB2IP	1	0
Target	DNMT1	1	0
Target	DNMT3A	1	0
Target	DNMT3B	1	0
Target	DRD2	1	0
Target	E2F1	1	0
Target	EDN1	1	0
Target	EDN2	1	0
Target	EPAS1	1	0
Target	EPRS	1	0
Target	ERBB4	1	0
Target	EZR	1	0
Target	F3	1	0
Target	F9	1	0
Target	FADD	1	0
Target	FAH	1	0
Target	FAS	1	0
Target	FGF23	1	0
Target	FGFR2	1	0
Target	FH	1	0
Target	FLT1	1	0
Target	FLT4	1	0
Target	FOXP3	1	0
Target	FYN	1	0
Target	GAA	1	0
Target	GAD1	1	0
Target	GATA3	1	0
Target	GC	1	0
Target	GJA5	1	0
Target	GLUL	1	0
Target	GNMT	1	0
Target	GPT	1	0
Target	GRIN1	1	0
Target	GRIN2B	1	0
Target	GSS	1	0
Target	HADHA	1	0
Target	HCRT	1	0
Target	HLCS	1	0
Target	HMBS	1	0
Target	HMGCL	1	0
Target	HPRT1	1	0
Target	HSPA5	1	0
Target	HSPB1	1	0
Target	HTR2A	1	0
Target	IGF1	1	0
Target	IGFBP3	1	0
Target	IKBKB	1	0
Target	IL1A	1	0
Target	IL4	1	0
Target	INS	1	0
Target	IRF1	1	0
Target	IVD	1	0
Target	KCNMA1	1	0
Target	KL	1	0
Target	LBP	1	0
Target	LCN2	1	0
Target	LEF1	1	0
Target	LIG4	1	0
Target	MAP2	1	0
Target	MAP2K4	1	0
Target	MAPK14	1	0
Target	MAPK8	1	0
Target	MAPK9	1	0
Target	MCCC2	1	0
Target	MET	1	0
Target	MIP	1	0
Target	MMACHC	1	0
Target	MMP14	1	0
Target	MMP3	1	0
Target	MTNR1B	1	0
Target	MTOR	1	0
Target	NAGS	1	0
Target	NCF1	1	0
Target	NEDD4	1	0
Target	NFE2L2	1	0
Target	NFKB1	1	0
Target	NKX2-1	1	0
Target	NOX1	1	0
Target	NPPA	1	0
Target	NQO1	1	0
Target	NR1H4	1	0
Target	NR3C1	1	0
Target	OAT	1	0
Target	ODC1	1	0
Target	OPRK1	1	0
Target	OXT	1	0
Target	OXTR	1	0
Target	PARP1	1	0
Target	PAX5	1	0
Target	PCCA	1	0
Target	PCNA	1	0
Target	PDE4D	1	0
Target	PDGFB	1	0
Target	PKD2	1	0
Target	PLCG2	1	0
Target	PLG	1	0
Target	PLOD1	1	0
Target	PLOD3	1	0
Target	PML	1	0
Target	POLA1	1	0
Target	POLE	1	0
Target	PPARA	1	0
Target	PRLR	1	0
Target	PRODH	1	0
Target	PTGER3	1	0
Target	RAF1	1	0
Target	RASA1	1	0
Target	RASSF1	1	0
Target	RB1	1	0
Target	RBP3	1	0
Target	RET	1	0
Target	RHO	1	0
Target	RLBP1	1	0
Target	RS1	1	0
Target	RUNX2	1	0
Target	S100A9	1	0
Target	SARS	1	0
Target	SCARB1	1	0
Target	SDHA	1	0
Target	SDHB	1	0
Target	SDHC	1	0
Target	SDHD	1	0
Target	SERPINE1	1	0
Target	SHH	1	0
Target	SLC19A3	1	0
Target	SLC1A2	1	0
Target	SLC1A3	1	0
Target	SLC1A6	1	0
Target	SLC25A4	1	0
Target	SLC2A1	1	0
Target	SLC3A1	1	0
Target	SLC7A11	1	0
Target	SLC7A2	1	0
Target	SLC7A8	1	0
Target	SLIT2	1	0
Target	SLPI	1	0
Target	SMOX	1	0
Target	SMPD3	1	0
Target	SOD2	1	0
Target	SPARC	1	0
Target	SPP1	1	0
Target	SPTLC1	1	0
Target	STAT5A	1	0
Target	STAT5B	1	0
Target	STIM1	1	0
Target	TAT	1	0
Target	TERT	1	0
Target	TGFB2	1	0
Target	TH	1	0
Target	THBD	1	0
Target	TLR4	1	0
Target	TNFAIP3	1	0
Target	TNFSF11	1	0
Target	TNNC1	1	0
Target	TNNI3	1	0
Target	TNNT2	1	0
Target	TOMM40	1	0
Target	TOP1	1	0
Target	TPO	1	0
Target	TRDMT1	1	0
Target	TRPV1	1	0
Target	TYMS	1	0
Target	UCHL1	1	0
Target	UHRF1	1	0
Target	UROD	1	0
Target	WNT5A	1	0
