# Supplementary material for: Synergistic Network Pharmacology for Traditional Chinese Medicine Liangxue Tongyu Formula in Acute Intracerebral Hemorrhagic Stroke
Source: Neural Plast. 2021 Feb 26;2021:8874296. doi: 10.1155/2021/8874296 (PMC7936909; doi:10.1155/2021/8874296)
Supplement: Supplementary Materials — S1 Table. 517 compounds of 8 herbs in LXTYF collected from TCMSP and BATMAN-TCM database. S2 Table. 874 targets of the active ingredients obtained from the TCMSP. S3 Table. 149 targets of active components predicted from the SwissTargetPrediction database. S4 Table. 2315 targets relating to ICH collected from GAD, Genecards, and DisGeNET database. S5 Table. Topological parameters of component-target network. S6 Table. Proteins-proteins interaction information of LXTYF targets for AICH in STRING 11.0. S7 Table. Topological parameters of the PPI network. S8 Table. Results of putative targets for KEGG pathway enrichment analysis. S9 Table. Detailed information of 583 differentially expressed mRNAs identified between MGT and MG. S10 Table. Details of the Herb-Compound-Target-Pathway(H-C-T-P) network connection verified in RNA-seq. [file 8874296.f1.zip › Supplementary Table S1-S10/S6 Table.xlsx]

## Sheet: string_interactions
#node1	node2	node1_string_internal_id	node2_string_internal_id	node1_external_id	node2_external_id	neighborhood_on_chromosome	gene_fusion	phylogenetic_cooccurrence	homology	coexpression	experimentally_determined_interaction	database_annotated	automated_textmining	combined_score
CCNA2	CDK6	4436109	4435642	9606.ENSP00000274026	9606.ENSP00000265734	0	0.003	0	0	0.163	0.994	0.72	0.769	0.999
POLA1	POLE	4445155	4439536	9606.ENSP00000368349	9606.ENSP00000322570	0	0	0	0	0.902	0.898	0.9	0.818	0.999
CASP8	FADD	4442125	4437802	9606.ENSP00000351273	9606.ENSP00000301838	0	0	0	0	0.061	0.876	0.9	0.975	0.999
DHFR	TYMS	4447922	4439011	9606.ENSP00000396308	9606.ENSP00000315644	0.219	0.317	0.437	0	0.479	0.122	0.9	0.96	0.999
CASP8	BCL2L1	4442125	4437866	9606.ENSP00000351273	9606.ENSP00000302564	0	0	0	0	0	0.993	0	0.883	0.999
CDKN1A	CCNA2	4447168	4436109	9606.ENSP00000384849	9606.ENSP00000274026	0	0	0	0	0.058	0.994	0.9	0.793	0.999
CDK2	CCNB1	4435732	4434484	9606.ENSP00000266970	9606.ENSP00000256442	0	0	0	0	0.433	0.974	0.9	0.856	0.999
CCNA2	CDK2	4436109	4435732	9606.ENSP00000274026	9606.ENSP00000266970	0	0.006	0	0	0.403	0.998	0.9	0.973	0.999
AKT1	MTOR	4450372	4442490	9606.ENSP00000451828	9606.ENSP00000354558	0	0	0	0	0.08	0.872	0.9	0.972	0.999
CDKN1A	TP53	4447168	4435880	9606.ENSP00000384849	9606.ENSP00000269305	0	0	0	0	0	0.696	0.9	0.97	0.999
RB1	CDK4	4435747	4434582	9606.ENSP00000267163	9606.ENSP00000257904	0	0	0	0	0.063	0.994	0.9	0.861	0.999
PLAU	SERPINE1	4444017	4433266	9606.ENSP00000361850	9606.ENSP00000223095	0	0	0	0	0.214	0.881	0.9	0.926	0.999
CDK2	CCND1	4435732	4433391	9606.ENSP00000266970	9606.ENSP00000227507	0	0	0	0	0.089	0.845	0.9	0.96	0.999
CDK6	CCND1	4435642	4433391	9606.ENSP00000265734	9606.ENSP00000227507	0	0	0	0	0.055	0.994	0.9	0.934	0.999
HIF1A	EGLN1	4449842	4442711	9606.ENSP00000437955	9606.ENSP00000355601	0	0	0	0	0	0.998	0.9	0.827	0.999
CASP8	FAS	4442125	4441783	9606.ENSP00000351273	9606.ENSP00000347979	0	0	0	0	0.063	0.993	0.9	0.867	0.999
SDHB	SDHA	4444576	4435517	9606.ENSP00000364649	9606.ENSP00000264932	0.295	0	0.444	0	0.921	0.998	0.9	0.944	0.999
F7	F3	4444589	4440531	9606.ENSP00000364731	9606.ENSP00000334145	0	0	0	0	0	0.901	0.9	0.967	0.999
AIMP1	EPRS	4446307	4442762	9606.ENSP00000378191	9606.ENSP00000355890	0.301	0.138	0	0	0.675	0.968	0.9	0.805	0.999
BCL2L1	TP53	4437866	4435880	9606.ENSP00000302564	9606.ENSP00000269305	0	0	0	0	0.05	0.912	0.9	0.967	0.999
PCCB	PCCA	4449005	4444705	9606.ENSP00000419027	9606.ENSP00000365462	0.167	0.061	0	0	0.507	0.714	0.9	0.943	0.999
SDHD	SDHB	4444585	4444576	9606.ENSP00000364699	9606.ENSP00000364649	0	0	0	0	0.844	0.791	0.9	0.968	0.999
CDKN1A	PCNA	4447168	4445167	9606.ENSP00000384849	9606.ENSP00000368458	0	0	0	0	0.063	0.994	0.9	0.321	0.999
CDK1	CCNA2	4446389	4436109	9606.ENSP00000378699	9606.ENSP00000274026	0	0.007	0	0	0.986	0.77	0.9	0.937	0.999
MAPK9	JUN	4447857	4443699	9606.ENSP00000394560	9606.ENSP00000360266	0	0	0	0	0	0.711	0.9	0.982	0.999
SDHD	SDHC	4444585	4442997	9606.ENSP00000364699	9606.ENSP00000356953	0	0	0	0	0.911	0.794	0.9	0.957	0.999
CDKN1A	CCND1	4447168	4433391	9606.ENSP00000384849	9606.ENSP00000227507	0	0	0	0	0.084	0.993	0.9	0.857	0.999
FAS	FADD	4441783	4437802	9606.ENSP00000347979	9606.ENSP00000301838	0	0	0	0	0	0.998	0.9	0.802	0.999
SERPINE1	PLAT	4433266	4433132	9606.ENSP00000223095	9606.ENSP00000220809	0	0	0	0	0.148	0.881	0.9	0.956	0.999
E2F1	RB1	4441534	4435747	9606.ENSP00000345571	9606.ENSP00000267163	0	0	0	0	0.145	0.974	0.9	0.841	0.999
SDHC	SDHA	4442997	4435517	9606.ENSP00000356953	9606.ENSP00000264932	0.295	0	0	0	0.861	0.927	0.9	0.906	0.999
CDKN2A	CDK4	4448997	4434582	9606.ENSP00000418915	9606.ENSP00000257904	0	0	0	0	0	0.812	0.9	0.956	0.999
IKBKB	TNF	4449555	4448041	9606.ENSP00000430684	9606.ENSP00000398698	0	0	0	0	0.061	0.993	0.9	0.684	0.999
CDK4	CCND1	4434582	4433391	9606.ENSP00000257904	9606.ENSP00000227507	0	0	0	0	0.082	0.994	0.9	0.973	0.999
AKT1	GSK3B	4450372	4439717	9606.ENSP00000451828	9606.ENSP00000324806	0	0	0.218	0.576	0.049	0.995	0.9	0.918	0.999
KL	FGF23	4445327	4433694	9606.ENSP00000369442	9606.ENSP00000237837	0	0	0	0	0	0.8	0.9	0.961	0.999
AKT1	NOS3	4450372	4437409	9606.ENSP00000451828	9606.ENSP00000297494	0	0	0	0	0.049	0.693	0.9	0.97	0.999
ASS1	OTC	4443929	4432619	9606.ENSP00000361471	9606.ENSP00000039007	0.294	0	0.299	0	0.851	0	0.9	0.936	0.999
CCNA2	CDK4	4436109	4434582	9606.ENSP00000274026	9606.ENSP00000257904	0	0.003	0	0	0.184	0.994	0.9	0.857	0.999
VEGFA	KDR	4451310	4435337	9606.ENSP00000478570	9606.ENSP00000263923	0	0	0	0	0.061	0.472	0.9	0.987	0.999
EGFR	EGF	4436186	4435570	9606.ENSP00000275493	9606.ENSP00000265171	0	0	0	0	0.16	0.933	0.9	0.972	0.999
SDHB	SDHC	4444576	4442997	9606.ENSP00000364649	9606.ENSP00000356953	0.295	0	0	0	0.943	0.949	0.9	0.966	0.999
MAPK8	JUN	4446429	4443699	9606.ENSP00000378974	9606.ENSP00000360266	0	0	0	0	0	0.788	0.9	0.985	0.999
CASP8	CASP3	4442125	4438651	9606.ENSP00000351273	9606.ENSP00000311032	0	0	0	0.835	0.061	0.993	0.9	0.978	0.999
VEGFA	FLT1	4451310	4436489	9606.ENSP00000478570	9606.ENSP00000282397	0	0	0	0	0.061	0.556	0.9	0.984	0.999
FGF1	FGFR2	4451524	4448546	9606.ENSP00000480791	9606.ENSP00000410294	0	0	0	0	0.078	0.954	0.9	0.829	0.999
SDHD	SDHA	4444585	4435517	9606.ENSP00000364699	9606.ENSP00000264932	0	0	0	0	0.602	0.794	0.9	0.944	0.999
RB1	CDK2	4435747	4435732	9606.ENSP00000267163	9606.ENSP00000266970	0	0	0	0	0.081	0.994	0.9	0.709	0.999
JUN	FOS	4443699	4438204	9606.ENSP00000360266	9606.ENSP00000306245	0	0	0	0	0.656	0.879	0.9	0.975	0.999
CDKN1A	CDK2	4447168	4435732	9606.ENSP00000384849	9606.ENSP00000266970	0	0	0	0	0.051	0.994	0.9	0.942	0.999
CDKN1A	CDK4	4447168	4434582	9606.ENSP00000384849	9606.ENSP00000257904	0	0	0	0	0.051	0.994	0.9	0.899	0.999
TNNI3	TNNC1	4441191	4433570	9606.ENSP00000341838	9606.ENSP00000232975	0	0	0	0	0.177	0.974	0.9	0.657	0.999
CDK1	CCNB1	4446389	4434484	9606.ENSP00000378699	9606.ENSP00000256442	0	0	0	0	0.969	0.999	0.9	0.983	0.999
DNMT1	DNMT3B	4442259	4440033	9606.ENSP00000352516	9606.ENSP00000328547	0	0	0	0	0.101	0.379	0.9	0.969	0.998
CASP9	CYCS	4440164	4438356	9606.ENSP00000330237	9606.ENSP00000307786	0	0	0	0	0.063	0.708	0.9	0.962	0.998
CDK1	BIRC5	4446389	4437778	9606.ENSP00000378699	9606.ENSP00000301633	0	0	0	0	0.967	0.379	0.9	0.526	0.998
THBD	F2	4444829	4438421	9606.ENSP00000366307	9606.ENSP00000308541	0	0	0	0	0	0.899	0.9	0.878	0.998
FGFR2	FGF2	4448546	4435443	9606.ENSP00000410294	9606.ENSP00000264498	0	0	0	0	0	0.863	0.9	0.885	0.998
PLG	SERPINE1	4438461	4433266	9606.ENSP00000308938	9606.ENSP00000223095	0	0	0	0	0.063	0.435	0.9	0.978	0.998
EGFR	STAT3	4436186	4435468	9606.ENSP00000275493	9606.ENSP00000264657	0	0	0	0	0	0.753	0.9	0.927	0.998
CCNA2	CCNB1	4436109	4434484	9606.ENSP00000274026	9606.ENSP00000256442	0	0	0	0.738	0.971	0.707	0.72	0.924	0.998
SOD2	CAT	4450194	4433793	9606.ENSP00000446252	9606.ENSP00000241052	0.069	0	0	0	0.08	0.419	0.9	0.968	0.998
BAK1	BCL2L1	4444397	4437866	9606.ENSP00000363591	9606.ENSP00000302564	0	0	0	0.689	0.096	0.978	0.9	0.793	0.998
IGFBP3	IGF1	4445494	4437883	9606.ENSP00000370473	9606.ENSP00000302665	0	0	0	0	0	0.379	0.9	0.971	0.998
BCL2L1	BAX	4437866	4437004	9606.ENSP00000302564	9606.ENSP00000293288	0	0	0	0.643	0.047	0.982	0.9	0.677	0.998
TNNI3	TNNT2	4441191	4433670	9606.ENSP00000341838	9606.ENSP00000236918	0	0	0	0	0.651	0.472	0.9	0.905	0.998
SOD2	SOD1	4450194	4435927	9606.ENSP00000446252	9606.ENSP00000270142	0	0	0	0	0.176	0.624	0.9	0.959	0.998
SRC	FYN	4444215	4441647	9606.ENSP00000362680	9606.ENSP00000346671	0	0	0.445	0.971	0	0.981	0.9	0.913	0.998
CBS	CTH	4446786	4443637	9606.ENSP00000381234	9606.ENSP00000359976	0.219	0.138	0.344	0	0.108	0.149	0.9	0.961	0.998
PCNA	POLE	4445167	4439536	9606.ENSP00000368458	9606.ENSP00000322570	0.044	0	0	0	0.43	0.918	0.9	0.556	0.997
TP53	CDK2	4435880	4435732	9606.ENSP00000269305	9606.ENSP00000266970	0	0	0	0	0.094	0.716	0.9	0.924	0.997
PTEN	TP53	4443848	4435880	9606.ENSP00000361021	9606.ENSP00000269305	0	0	0	0	0	0.472	0.9	0.963	0.997
IL6	STAT3	4447254	4435468	9606.ENSP00000385675	9606.ENSP00000264657	0	0	0	0	0	0.269	0.9	0.97	0.997
CDKN2A	TP53	4448997	4435880	9606.ENSP00000418915	9606.ENSP00000269305	0	0	0	0	0	0.384	0.9	0.968	0.997
TOP2A	TOP1	4448614	4442483	9606.ENSP00000411532	9606.ENSP00000354522	0	0	0	0	0.112	0.925	0.54	0.918	0.997
IKBKB	RELA	4449555	4447098	9606.ENSP00000430684	9606.ENSP00000384273	0	0	0	0	0.063	0.871	0.9	0.831	0.997
ELANE	SLPI	4450799	4441219	9606.ENSP00000466090	9606.ENSP00000342082	0	0	0	0	0.061	0.87	0.9	0.833	0.997
CDK1	PCNA	4446389	4445167	9606.ENSP00000378699	9606.ENSP00000368458	0	0	0	0	0.983	0.756	0	0.443	0.997
OXTR	OXT	4439675	4433016	9606.ENSP00000324270	9606.ENSP00000217386	0	0	0	0	0	0.379	0.9	0.969	0.997
CDKN2A	CDK6	4448997	4435642	9606.ENSP00000418915	9606.ENSP00000265734	0	0	0	0	0	0.868	0.9	0.792	0.997
AKT1	INS	4450372	4446661	9606.ENSP00000451828	9606.ENSP00000380432	0	0	0	0	0	0.262	0.9	0.967	0.997
CDKN1A	CDK1	4447168	4446389	9606.ENSP00000384849	9606.ENSP00000378699	0	0	0	0	0.051	0.858	0.9	0.828	0.997
IL10	TNF	4448642	4448041	9606.ENSP00000412237	9606.ENSP00000398698	0	0	0	0	0.097	0	0.9	0.974	0.997
IL10	IL6	4448642	4447254	9606.ENSP00000412237	9606.ENSP00000385675	0	0	0	0	0.077	0	0.9	0.974	0.997
PCNA	POLA1	4445167	4445155	9606.ENSP00000368458	9606.ENSP00000368349	0.044	0	0	0	0.853	0.623	0.9	0.544	0.997
RXRA	PPARG	4449061	4436745	9606.ENSP00000419692	9606.ENSP00000287820	0	0	0	0.694	0.061	0.961	0.9	0.821	0.997
FOXP3	IL2	4444690	4433376	9606.ENSP00000365380	9606.ENSP00000226730	0	0	0	0	0	0.472	0.9	0.958	0.997
IL1B	IL1A	4435241	4435240	9606.ENSP00000263341	9606.ENSP00000263339	0	0	0	0	0.753	0	0.9	0.921	0.997
ALAD	HMBS	4447356	4436303	9606.ENSP00000386284	9606.ENSP00000278715	0.295	0	0.437	0	0.23	0.269	0.9	0.917	0.997
EGLN1	EPAS1	4442711	4435307	9606.ENSP00000355601	9606.ENSP00000263734	0	0	0	0	0.065	0.806	0.9	0.866	0.997
ERBB2	EGF	4435897	4435570	9606.ENSP00000269571	9606.ENSP00000265171	0	0	0	0	0.16	0.406	0.9	0.94	0.996
SOD1	CAT	4435927	4433793	9606.ENSP00000270142	9606.ENSP00000241052	0.11	0	0	0	0.129	0.44	0.9	0.937	0.996
MTR	MTRR	4442697	4435473	9606.ENSP00000355536	9606.ENSP00000264668	0	0	0	0	0.063	0.379	0.9	0.951	0.996
IGF2	IGFBP3	4447717	4445494	9606.ENSP00000391826	9606.ENSP00000370473	0	0	0	0	0.155	0.379	0.9	0.938	0.996
JUN	MAPK1	4443699	4432880	9606.ENSP00000360266	9606.ENSP00000215832	0	0	0	0	0	0.411	0.9	0.952	0.996
DNMT1	DNMT3A	4442259	4435481	9606.ENSP00000352516	9606.ENSP00000264709	0	0	0	0	0.049	0.379	0.9	0.95	0.996
IL6	IL4	4447254	4433533	9606.ENSP00000385675	9606.ENSP00000231449	0	0	0	0	0	0	0.9	0.968	0.996
CDKN1A	CDK6	4447168	4435642	9606.ENSP00000384849	9606.ENSP00000265734	0	0	0	0	0.051	0.879	0.9	0.754	0.996
VEGFA	HIF1A	4451310	4449842	9606.ENSP00000478570	9606.ENSP00000437955	0	0	0	0	0.062	0.348	0.9	0.947	0.996
UHRF1	DNMT1	4451406	4442259	9606.ENSP00000479617	9606.ENSP00000352516	0.167	0	0	0	0.345	0.472	0.9	0.897	0.996
CASP1	IL1B	4449658	4435241	9606.ENSP00000433138	9606.ENSP00000263341	0	0	0	0	0.287	0.457	0.9	0.917	0.996
PRTN3	MPO	4433625	4433305	9606.ENSP00000234347	9606.ENSP00000225275	0	0	0	0	0.566	0.061	0.9	0.921	0.996
CYCS	BCL2L1	4438356	4437866	9606.ENSP00000307786	9606.ENSP00000302564	0	0	0	0	0	0.708	0.9	0.901	0.996
BIRC5	CCNB1	4437778	4434484	9606.ENSP00000301633	9606.ENSP00000256442	0	0	0	0	0.888	0.185	0.9	0.651	0.996
NFE2L2	HMOX1	4446632	4432912	9606.ENSP00000380252	9606.ENSP00000216117	0	0	0	0	0	0	0.9	0.968	0.996
BRCA1	TP53	4448999	4435880	9606.ENSP00000418960	9606.ENSP00000269305	0	0	0	0	0.077	0.7	0.9	0.896	0.996
TOP2A	CDK1	4448614	4446389	9606.ENSP00000411532	9606.ENSP00000378699	0	0	0	0	0.986	0.386	0	0.597	0.996
MYC	CDKN1A	4451407	4447168	9606.ENSP00000479618	9606.ENSP00000384849	0	0	0	0	0	0.378	0.9	0.945	0.996
BCL2	CASP8	4446777	4442125	9606.ENSP00000381185	9606.ENSP00000351273	0	0	0	0	0	0.993	0	0.43	0.996
IL10	IL1B	4448642	4435241	9606.ENSP00000412237	9606.ENSP00000263341	0	0	0	0	0.085	0	0.9	0.96	0.996
IL10	CXCL8	4448642	4438229	9606.ENSP00000412237	9606.ENSP00000306512	0	0	0	0	0.061	0	0.9	0.962	0.996
AKT1	CDKN1A	4450372	4447168	9606.ENSP00000451828	9606.ENSP00000384849	0	0	0	0	0	0.696	0.9	0.851	0.995
SRC	STAT3	4444215	4435468	9606.ENSP00000362680	9606.ENSP00000264657	0	0	0	0	0.058	0.432	0.9	0.92	0.995
AKT1	EGLN1	4450372	4442711	9606.ENSP00000451828	9606.ENSP00000355601	0	0	0	0	0.062	0.993	0	0.378	0.995
CASP3	CYCS	4438651	4438356	9606.ENSP00000311032	9606.ENSP00000307786	0	0	0	0	0.063	0	0.9	0.959	0.995
IKBKB	NFKB1	4449555	4433374	9606.ENSP00000430684	9606.ENSP00000226574	0	0	0	0	0.062	0.733	0.9	0.853	0.995
RELA	CHUK	4447098	4443527	9606.ENSP00000384273	9606.ENSP00000359424	0	0	0	0	0.067	0.871	0.9	0.705	0.995
ELANE	MPO	4450799	4433305	9606.ENSP00000466090	9606.ENSP00000225275	0	0	0	0	0.784	0.061	0.9	0.815	0.995
IL10	CCL2	4448642	4433339	9606.ENSP00000412237	9606.ENSP00000225831	0	0	0	0	0	0	0.9	0.955	0.995
MAPK8	TP53	4446429	4435880	9606.ENSP00000378974	9606.ENSP00000269305	0	0	0	0	0	0.472	0.9	0.915	0.995
JUN	MAPK14	4443699	4433482	9606.ENSP00000360266	9606.ENSP00000229795	0	0	0	0	0	0.471	0.9	0.918	0.995
ARRB1	ADRB2	4448521	4438121	9606.ENSP00000409581	9606.ENSP00000305372	0	0	0	0	0	0.477	0.9	0.923	0.995
CPS1	ASS1	4448239	4443929	9606.ENSP00000402608	9606.ENSP00000361471	0.185	0.627	0	0	0.522	0.35	0.8	0.803	0.995
IL10	STAT3	4448642	4435468	9606.ENSP00000412237	9606.ENSP00000264657	0	0	0	0	0	0.429	0.9	0.933	0.995
VEGFA	STAT3	4451310	4435468	9606.ENSP00000478570	9606.ENSP00000264657	0	0	0	0	0	0.434	0.9	0.916	0.994
CAV1	NOS3	4440933	4437409	9606.ENSP00000339191	9606.ENSP00000297494	0	0	0	0	0	0.379	0.9	0.915	0.994
CDK1	CDK2	4446389	4435732	9606.ENSP00000378699	9606.ENSP00000266970	0	0	0.441	0.968	0.684	0.819	0.9	0.935	0.994
COL3A1	COL1A1	4438049	4433346	9606.ENSP00000304408	9606.ENSP00000225964	0	0	0.439	0.951	0.944	0	0.9	0.901	0.994
AKT1	TP53	4450372	4435880	9606.ENSP00000451828	9606.ENSP00000269305	0	0	0	0	0.054	0.147	0.9	0.941	0.994
PCNA	CDK2	4445167	4435732	9606.ENSP00000368458	9606.ENSP00000266970	0	0	0	0	0.685	0.718	0.9	0.467	0.994
AKT1	STAT3	4450372	4435468	9606.ENSP00000451828	9606.ENSP00000264657	0	0	0	0	0	0.124	0.9	0.938	0.994
CASP8	CASP9	4442125	4440164	9606.ENSP00000351273	9606.ENSP00000330237	0	0	0	0.707	0	0.993	0	0.956	0.994
TNF	VCAM1	4448041	4437090	9606.ENSP00000398698	9606.ENSP00000294728	0	0	0	0	0	0	0.9	0.949	0.994
CSF2	IL2	4437349	4433376	9606.ENSP00000296871	9606.ENSP00000226730	0	0	0	0	0	0	0.9	0.95	0.994
INS	IGF1	4446661	4437883	9606.ENSP00000380432	9606.ENSP00000302665	0	0	0	0	0	0	0.8	0.971	0.994
AKT1	CASP9	4450372	4440164	9606.ENSP00000451828	9606.ENSP00000330237	0	0	0	0	0	0.393	0.9	0.919	0.994
VEGFA	NOS3	4451310	4437409	9606.ENSP00000478570	9606.ENSP00000297494	0	0	0	0	0.062	0	0.9	0.934	0.993
HMBS	UROD	4436303	4433980	9606.ENSP00000278715	9606.ENSP00000246337	0.295	0.658	0.217	0	0.643	0.269	0	0.885	0.993
BCL2L1	STAT3	4437866	4435468	9606.ENSP00000302564	9606.ENSP00000264657	0	0	0	0	0	0.263	0.9	0.916	0.993
VEGFA	TGFB1	4451310	4433189	9606.ENSP00000478570	9606.ENSP00000221930	0	0	0	0	0	0	0.9	0.939	0.993
CDKN1A	CCNB1	4447168	4434484	9606.ENSP00000384849	9606.ENSP00000256442	0	0	0	0	0	0.774	0.9	0.744	0.993
IL10	CSF2	4448642	4437349	9606.ENSP00000412237	9606.ENSP00000296871	0	0	0	0	0.061	0	0.9	0.937	0.993
ADH1B	ALDH2	4438237	4434937	9606.ENSP00000306606	9606.ENSP00000261733	0.048	0	0	0	0.14	0	0.9	0.924	0.993
MYC	CDKN2A	4451407	4448997	9606.ENSP00000479618	9606.ENSP00000418915	0	0	0	0	0	0.379	0.9	0.902	0.993
VEGFA	IGF1	4451310	4437883	9606.ENSP00000478570	9606.ENSP00000302665	0	0	0	0	0	0	0.9	0.936	0.993
STAT3	CCND1	4435468	4433391	9606.ENSP00000264657	9606.ENSP00000227507	0	0	0	0	0.049	0.457	0.9	0.894	0.993
AKT1	BCL2L1	4450372	4437866	9606.ENSP00000451828	9606.ENSP00000302564	0	0	0	0	0.073	0.32	0.9	0.902	0.993
VEGFA	EGF	4451310	4435570	9606.ENSP00000478570	9606.ENSP00000265171	0	0	0	0	0	0	0.9	0.937	0.993
F3	F2	4440531	4438421	9606.ENSP00000334145	9606.ENSP00000308541	0	0	0	0	0	0	0.9	0.933	0.993
CAV1	EGFR	4440933	4436186	9606.ENSP00000339191	9606.ENSP00000275493	0	0	0	0	0.335	0.393	0.9	0.844	0.992
F10	F3	4444587	4440531	9606.ENSP00000364709	9606.ENSP00000334145	0	0	0	0	0	0.379	0.9	0.892	0.992
IGF1	EGF	4437883	4435570	9606.ENSP00000302665	9606.ENSP00000265171	0	0	0	0	0	0	0.9	0.926	0.992
GRIN2B	FYN	4451206	4441647	9606.ENSP00000477455	9606.ENSP00000346671	0	0	0	0	0.061	0.398	0.9	0.883	0.992
CXCL8	IL1B	4438229	4435241	9606.ENSP00000306512	9606.ENSP00000263341	0	0	0	0	0.676	0	0	0.977	0.992
TNF	IL4	4448041	4433533	9606.ENSP00000398698	9606.ENSP00000231449	0	0	0	0	0	0	0.9	0.931	0.992
SRC	PTPN1	4444215	4443784	9606.ENSP00000362680	9606.ENSP00000360683	0	0	0	0	0.085	0.456	0.9	0.868	0.992
MYC	JUN	4451407	4443699	9606.ENSP00000479618	9606.ENSP00000360266	0	0	0	0	0.063	0.379	0.9	0.878	0.992
DNMT1	RB1	4442259	4435747	9606.ENSP00000352516	9606.ENSP00000267163	0	0	0	0	0.061	0.865	0.9	0.471	0.992
AKT1	ERBB3	4450372	4435741	9606.ENSP00000451828	9606.ENSP00000267101	0	0	0	0	0	0.349	0.9	0.898	0.992
RB1	CCND1	4435747	4433391	9606.ENSP00000267163	9606.ENSP00000227507	0	0	0	0	0.062	0.522	0.9	0.858	0.992
NR1H4	RXRA	4450225	4449061	9606.ENSP00000447149	9606.ENSP00000419692	0	0	0	0.668	0.062	0.904	0.9	0.745	0.992
SRC	CAV1	4444215	4440933	9606.ENSP00000362680	9606.ENSP00000339191	0	0	0	0	0	0.389	0.9	0.886	0.992
LEP	STAT3	4438805	4435468	9606.ENSP00000312652	9606.ENSP00000264657	0	0	0	0	0	0	0.9	0.928	0.992
MYC	AKT1	4451407	4450372	9606.ENSP00000479618	9606.ENSP00000451828	0	0	0	0	0.052	0.156	0.9	0.915	0.992
RELA	NFKB1	4447098	4433374	9606.ENSP00000384273	9606.ENSP00000226574	0	0	0	0.776	0.133	0.9	0.9	0.886	0.992
VEGFA	FLT4	4451310	4434983	9606.ENSP00000478570	9606.ENSP00000261937	0	0	0	0	0.061	0.174	0.9	0.918	0.992
FOS	MAPK1	4438204	4432880	9606.ENSP00000306245	9606.ENSP00000215832	0	0	0	0	0	0.523	0.9	0.852	0.992
CDKN2A	CCND1	4448997	4433391	9606.ENSP00000418915	9606.ENSP00000227507	0	0	0	0	0.061	0.313	0.9	0.901	0.992
CXCL8	IL4	4438229	4433533	9606.ENSP00000306512	9606.ENSP00000231449	0	0	0	0	0	0	0.9	0.927	0.992
MMP9	PLG	4443919	4438461	9606.ENSP00000361405	9606.ENSP00000308938	0	0	0	0	0.063	0.379	0.9	0.863	0.991
INS	PTPN1	4446661	4443784	9606.ENSP00000380432	9606.ENSP00000360683	0	0	0	0	0	0	0.9	0.914	0.991
IL10	CXCL10	4448642	4438146	9606.ENSP00000412237	9606.ENSP00000305651	0	0	0	0	0.083	0	0.9	0.913	0.991
BCL2	BCL2L1	4446777	4437866	9606.ENSP00000381185	9606.ENSP00000302564	0	0	0	0.898	0	0.912	0.9	0.633	0.991
ERBB4	STAT5A	4441238	4441128	9606.ENSP00000342235	9606.ENSP00000341208	0	0	0	0	0.049	0.755	0.9	0.696	0.991
INS	EGF	4446661	4435570	9606.ENSP00000380432	9606.ENSP00000265171	0	0	0	0	0	0	0.8	0.957	0.991
IKBKB	CHUK	4449555	4443527	9606.ENSP00000430684	9606.ENSP00000359424	0	0	0	0.942	0	0.91	0.9	0.953	0.991
STAT5A	IL2	4441128	4433376	9606.ENSP00000341208	9606.ENSP00000226730	0	0	0	0	0	0	0.9	0.918	0.991
CPS1	OTC	4448239	4432619	9606.ENSP00000402608	9606.ENSP00000039007	0	0.277	0	0	0.318	0.173	0.9	0.83	0.991
MAP2K4	MAPK8	4448551	4446429	9606.ENSP00000410402	9606.ENSP00000378974	0	0	0.333	0.581	0.102	0.826	0.9	0.966	0.991
IL4	CCL2	4433533	4433339	9606.ENSP00000231449	9606.ENSP00000225831	0	0	0	0	0	0	0.9	0.918	0.991
GRIN2B	GRIN1	4451206	4443769	9606.ENSP00000477455	9606.ENSP00000360608	0	0	0	0.697	0.267	0.851	0.9	0.935	0.991
AKT1	ESR1	4450372	4448358	9606.ENSP00000451828	9606.ENSP00000405330	0	0	0	0	0.055	0.407	0.9	0.867	0.991
STAT5B	IL2	4437006	4433376	9606.ENSP00000293328	9606.ENSP00000226730	0	0	0	0	0	0	0.9	0.915	0.991
SDHC	FH	4442997	4442694	9606.ENSP00000356953	9606.ENSP00000355518	0.043	0	0	0	0.687	0.05	0.9	0.75	0.991
MYC	CDK2	4451407	4435732	9606.ENSP00000479618	9606.ENSP00000266970	0	0	0	0	0.118	0.342	0.9	0.865	0.991
IL1B	IL4	4435241	4433533	9606.ENSP00000263341	9606.ENSP00000231449	0	0	0	0	0	0	0.9	0.916	0.991
BTK	PLCG2	4451790	4451677	9606.ENSP00000483570	9606.ENSP00000482457	0	0	0	0	0.108	0.472	0.9	0.842	0.991
OAT	ARG1	4443204	4441926	9606.ENSP00000357838	9606.ENSP00000349446	0.185	0.405	0	0	0.343	0.132	0.9	0.751	0.991
LEP	PPARG	4438805	4436745	9606.ENSP00000312652	9606.ENSP00000287820	0	0	0	0	0.061	0	0.9	0.915	0.991
JUN	TP53	4443699	4435880	9606.ENSP00000360266	9606.ENSP00000269305	0	0	0	0	0	0.127	0.9	0.912	0.991
IVD	MCCC2	4448961	4441355	9606.ENSP00000418397	9606.ENSP00000343657	0.071	0.004	0.264	0	0.677	0	0.9	0.67	0.991
MAPK8	FOS	4446429	4438204	9606.ENSP00000378974	9606.ENSP00000306245	0	0	0	0	0	0.26	0.9	0.885	0.99
SDHB	FH	4444576	4442694	9606.ENSP00000364649	9606.ENSP00000355518	0.295	0	0	0	0.327	0.052	0.9	0.824	0.99
CCNA2	TP53	4436109	4435880	9606.ENSP00000274026	9606.ENSP00000269305	0	0	0	0	0.091	0.354	0.9	0.857	0.99
GSK3B	CCND1	4439717	4433391	9606.ENSP00000324806	9606.ENSP00000227507	0	0	0	0	0	0.526	0.9	0.822	0.99
STAT5B	EGFR	4437006	4436186	9606.ENSP00000293328	9606.ENSP00000275493	0	0	0	0	0.049	0.755	0.8	0.822	0.99
HSPB1	MAPK14	4434059	4433482	9606.ENSP00000248553	9606.ENSP00000229795	0	0	0	0	0	0.432	0.9	0.846	0.99
PARP1	CASP3	4442743	4438651	9606.ENSP00000355759	9606.ENSP00000311032	0	0	0	0	0.062	0.472	0.9	0.839	0.99
AKT1	PTEN	4450372	4443848	9606.ENSP00000451828	9606.ENSP00000361021	0	0	0	0	0.06	0.472	0	0.981	0.99
MYC	STAT3	4451407	4435468	9606.ENSP00000479618	9606.ENSP00000264657	0	0	0	0	0	0.379	0.9	0.859	0.99
SRC	EGF	4444215	4435570	9606.ENSP00000362680	9606.ENSP00000265171	0	0	0	0	0	0.05	0.9	0.909	0.99
ESR1	CCND1	4448358	4433391	9606.ENSP00000405330	9606.ENSP00000227507	0	0	0	0	0	0.384	0.9	0.858	0.99
ESR1	SRC	4448358	4444215	9606.ENSP00000405330	9606.ENSP00000362680	0	0	0	0	0.061	0.52	0.9	0.803	0.99
TNF	RELA	4448041	4447098	9606.ENSP00000398698	9606.ENSP00000384273	0	0	0	0	0	0.428	0.9	0.849	0.99
GRIN2A	GRIN1	4446563	4443769	9606.ENSP00000379818	9606.ENSP00000360608	0	0	0	0.687	0.266	0.826	0.9	0.96	0.99
AR	SRC	4444436	4444215	9606.ENSP00000363822	9606.ENSP00000362680	0	0	0	0	0	0.407	0.9	0.857	0.99
TP53	MAPK14	4435880	4433482	9606.ENSP00000269305	9606.ENSP00000229795	0	0	0	0	0	0.472	0.9	0.837	0.99
DRD2	SLC6A3	4442557	4435941	9606.ENSP00000354859	9606.ENSP00000270349	0	0	0	0	0.062	0.454	0.8	0.917	0.99
NAGS	OTC	4437012	4432619	9606.ENSP00000293404	9606.ENSP00000039007	0.295	0	0	0	0.851	0	0	0.917	0.99
RB1	CDK6	4435747	4435642	9606.ENSP00000267163	9606.ENSP00000265734	0	0	0	0	0.063	0.478	0.9	0.813	0.989
STAT1	IFNG	4442456	4433446	9606.ENSP00000354394	9606.ENSP00000229135	0	0	0	0	0.063	0	0.9	0.898	0.989
MYC	TERT	4451407	4438520	9606.ENSP00000479618	9606.ENSP00000309572	0	0	0	0	0.077	0.139	0.9	0.884	0.989
STAT5A	EGFR	4441128	4436186	9606.ENSP00000341208	9606.ENSP00000275493	0	0	0	0	0.049	0.755	0.8	0.795	0.989
HLCS	PCCA	4446889	4444705	9606.ENSP00000382071	9606.ENSP00000365462	0.219	0	0	0	0	0	0.9	0.877	0.989
CASP3	MAPK14	4438651	4433482	9606.ENSP00000311032	9606.ENSP00000229795	0	0	0	0	0.061	0.521	0.9	0.793	0.989
STAT3	MAPK1	4435468	4432880	9606.ENSP00000264657	9606.ENSP00000215832	0	0	0	0	0.06	0.384	0.9	0.837	0.989
CDK4	CCNB1	4434582	4434484	9606.ENSP00000257904	9606.ENSP00000256442	0	0	0	0	0.213	0.265	0.9	0.832	0.989
TLR4	CD14	4444300	4438033	9606.ENSP00000363089	9606.ENSP00000304236	0	0	0	0	0.264	0.472	0.9	0.758	0.989
TNF	IL1B	4448041	4435241	9606.ENSP00000398698	9606.ENSP00000263341	0	0	0	0	0.441	0	0	0.981	0.989
MTOR	STAT3	4442490	4435468	9606.ENSP00000354558	9606.ENSP00000264657	0	0	0	0	0.049	0.379	0.9	0.835	0.989
APRT	HPRT1	4445041	4437502	9606.ENSP00000367615	9606.ENSP00000298556	0.208	0	0	0	0.064	0.387	0.8	0.898	0.989
SDHD	FH	4444585	4442694	9606.ENSP00000364699	9606.ENSP00000355518	0	0	0	0	0.391	0.123	0.9	0.825	0.989
ERBB3	EGF	4435741	4435570	9606.ENSP00000267101	9606.ENSP00000265171	0	0	0	0	0.177	0.402	0.9	0.814	0.989
VEGFA	MMP9	4451310	4443919	9606.ENSP00000478570	9606.ENSP00000361405	0	0	0	0	0	0	0.8	0.946	0.989
E2F1	CCNA2	4441534	4436109	9606.ENSP00000345571	9606.ENSP00000274026	0	0	0	0	0.313	0.521	0.9	0.714	0.989
PRLR	STAT5B	4451730	4437006	9606.ENSP00000482954	9606.ENSP00000293328	0	0	0	0	0	0.399	0.9	0.83	0.988
AKT1	HIF1A	4450372	4449842	9606.ENSP00000451828	9606.ENSP00000437955	0	0	0	0	0	0.362	0.9	0.827	0.988
MMACHC	MTRR	4447043	4435473	9606.ENSP00000383840	9606.ENSP00000264668	0	0	0	0	0.063	0	0.9	0.89	0.988
ESR1	GATA3	4448358	4445191	9606.ENSP00000405330	9606.ENSP00000368632	0	0	0	0	0.09	0.455	0.9	0.794	0.988
SRC	STAT5A	4444215	4441128	9606.ENSP00000362680	9606.ENSP00000341208	0	0	0	0	0.063	0.402	0.9	0.821	0.988
MAP2K4	MAPK9	4448551	4447857	9606.ENSP00000410402	9606.ENSP00000394560	0	0	0.306	0.581	0.091	0.803	0.9	0.841	0.988
FLT1	KDR	4436489	4435337	9606.ENSP00000282397	9606.ENSP00000263923	0	0	0	0.909	0.162	0.865	0.9	0.954	0.988
PTPN1	EGFR	4443784	4436186	9606.ENSP00000360683	9606.ENSP00000275493	0	0	0	0	0	0.47	0.9	0.798	0.988
VEGFA	PDGFB	4451310	4440178	9606.ENSP00000478570	9606.ENSP00000330382	0	0	0	0	0	0.379	0.9	0.826	0.988
FOS	STAT3	4438204	4435468	9606.ENSP00000306245	9606.ENSP00000264657	0	0	0	0	0	0.423	0.9	0.811	0.988
EGFR	ERBB3	4436186	4435741	9606.ENSP00000275493	9606.ENSP00000267101	0	0	0	0.913	0.061	0.875	0.9	0.968	0.988
CXCL11	CXCL10	4438264	4438146	9606.ENSP00000306884	9606.ENSP00000305651	0	0	0	0.818	0.842	0.221	0.9	0.896	0.988
IKBKB	PRKCQ	4449555	4435203	9606.ENSP00000430684	9606.ENSP00000263125	0	0	0	0.565	0.062	0.864	0.9	0.42	0.988
PCCA	MCCC2	4444705	4441355	9606.ENSP00000365462	9606.ENSP00000343657	0.167	0.125	0	0	0.495	0.432	0.9	0.547	0.988
CXCL8	CXCL10	4438229	4438146	9606.ENSP00000306512	9606.ENSP00000305651	0	0	0	0	0.144	0	0.9	0.869	0.987
PRLR	STAT5A	4451730	4441128	9606.ENSP00000482954	9606.ENSP00000341208	0	0	0	0	0	0.299	0.9	0.841	0.987
CHUK	PRKCQ	4443527	4435203	9606.ENSP00000359424	9606.ENSP00000263125	0	0	0	0.561	0.062	0.864	0.9	0.267	0.987
CASP8	TP53	4442125	4435880	9606.ENSP00000351273	9606.ENSP00000269305	0	0	0	0	0.098	0.328	0.8	0.908	0.987
OAT	ODC1	4443204	4433616	9606.ENSP00000357838	9606.ENSP00000234111	0.185	0	0	0	0.062	0	0.9	0.857	0.987
MAPT	GSK3B	4441081	4439717	9606.ENSP00000340820	9606.ENSP00000324806	0	0	0	0	0.061	0.379	0.9	0.804	0.987
PRKCA	PRKCE	4448494	4438196	9606.ENSP00000408695	9606.ENSP00000306124	0	0	0	0.924	0.055	0.871	0.9	0.733	0.987
VEGFA	SRC	4451310	4444215	9606.ENSP00000478570	9606.ENSP00000362680	0	0	0	0	0.065	0	0.9	0.881	0.987
FH	SDHA	4442694	4435517	9606.ENSP00000355518	9606.ENSP00000264932	0.295	0	0	0	0.323	0.08	0.9	0.754	0.987
RELA	CXCL8	4447098	4438229	9606.ENSP00000384273	9606.ENSP00000306512	0	0	0	0	0.065	0.342	0.9	0.817	0.987
BRCA1	ESR1	4448999	4448358	9606.ENSP00000418960	9606.ENSP00000405330	0	0	0	0	0	0.447	0.9	0.799	0.987
ASS1	NAGS	4443929	4437012	9606.ENSP00000361471	9606.ENSP00000293404	0.295	0	0	0	0.845	0	0	0.893	0.987
CASP8	MAPK1	4442125	4432880	9606.ENSP00000351273	9606.ENSP00000215832	0	0	0	0	0	0.482	0.9	0.778	0.987
TNNT2	TNNC1	4433670	4433570	9606.ENSP00000236918	9606.ENSP00000232975	0	0	0	0	0.356	0.524	0.9	0.636	0.987
TNFAIP3	TNF	4451592	4448041	9606.ENSP00000481570	9606.ENSP00000398698	0	0	0	0	0.229	0.369	0.9	0.777	0.987
AKT1	PTPN1	4450372	4443784	9606.ENSP00000451828	9606.ENSP00000360683	0	0	0	0	0.09	0.397	0.9	0.796	0.987
CDKN2A	E2F1	4448997	4441534	9606.ENSP00000418915	9606.ENSP00000345571	0	0	0	0	0.083	0.392	0.9	0.805	0.987
F3	F9	4440531	4433043	9606.ENSP00000334145	9606.ENSP00000218099	0	0	0	0	0	0	0.9	0.868	0.986
TP53	STAT3	4435880	4435468	9606.ENSP00000269305	9606.ENSP00000264657	0	0	0	0	0	0	0.9	0.87	0.986
MAPK9	TP53	4447857	4435880	9606.ENSP00000394560	9606.ENSP00000269305	0	0	0	0	0	0.437	0.9	0.786	0.986
STAT5A	MAPK1	4441128	4432880	9606.ENSP00000341208	9606.ENSP00000215832	0	0	0	0	0.061	0.517	0.9	0.746	0.986
FOXP3	IFNG	4444690	4433446	9606.ENSP00000365380	9606.ENSP00000229135	0	0	0	0	0.06	0.441	0.9	0.776	0.986
TOP2A	CCNB1	4448614	4434484	9606.ENSP00000411532	9606.ENSP00000256442	0	0	0	0	0.964	0.057	0	0.622	0.986
BRCA1	POLE	4448999	4439536	9606.ENSP00000418960	9606.ENSP00000322570	0	0	0	0	0.279	0.693	0.9	0.463	0.986
NOX1	NCF1	4444065	4436815	9606.ENSP00000362057	9606.ENSP00000289473	0	0	0	0	0.109	0	0.8	0.928	0.986
ERBB4	STAT5B	4441238	4437006	9606.ENSP00000342235	9606.ENSP00000293328	0	0	0	0	0.049	0.755	0.9	0.475	0.986
MTOR	EGFR	4442490	4436186	9606.ENSP00000354558	9606.ENSP00000275493	0	0	0	0	0.061	0.204	0.9	0.843	0.986
TP53	RB1	4435880	4435747	9606.ENSP00000269305	9606.ENSP00000267163	0	0	0	0	0.061	0.379	0.9	0.789	0.986
MYC	MAPK1	4451407	4432880	9606.ENSP00000479618	9606.ENSP00000215832	0	0	0	0	0	0.379	0.9	0.798	0.986
HIF1A	STAT3	4449842	4435468	9606.ENSP00000437955	9606.ENSP00000264657	0	0	0	0	0.061	0.434	0.9	0.781	0.986
COL5A1	COL1A1	4443819	4433346	9606.ENSP00000360882	9606.ENSP00000225964	0	0	0.42	0.85	0.772	0.361	0.9	0.774	0.986
TNF	CASP8	4448041	4442125	9606.ENSP00000398698	9606.ENSP00000351273	0	0	0	0	0.062	0.394	0.9	0.788	0.986
TNF	JUN	4448041	4443699	9606.ENSP00000398698	9606.ENSP00000360266	0	0	0	0	0	0	0.9	0.871	0.986
MAPK8	BCL2L1	4446429	4437866	9606.ENSP00000378974	9606.ENSP00000302564	0	0	0	0	0	0.519	0.8	0.869	0.986
CDK1	TYMS	4446389	4439011	9606.ENSP00000378699	9606.ENSP00000315644	0	0	0	0	0.981	0	0	0.318	0.986
AR	CCND1	4444436	4433391	9606.ENSP00000363822	9606.ENSP00000227507	0	0	0	0	0.061	0.384	0.9	0.795	0.986
SPARC	COL1A1	4433520	4433346	9606.ENSP00000231061	9606.ENSP00000225964	0	0	0	0	0.94	0.456	0	0.627	0.986
STAT1	EGFR	4442456	4436186	9606.ENSP00000354394	9606.ENSP00000275493	0	0	0	0	0.061	0.42	0.9	0.764	0.985
JUN	NR3C1	4443699	4433539	9606.ENSP00000360266	9606.ENSP00000231509	0	0	0	0	0	0.472	0.9	0.739	0.985
GRIN2A	FYN	4446563	4441647	9606.ENSP00000379818	9606.ENSP00000346671	0	0	0	0	0	0.398	0.9	0.779	0.985
IL6	CXCL8	4447254	4438229	9606.ENSP00000385675	9606.ENSP00000306512	0	0	0	0	0.581	0	0	0.966	0.985
TP53	MAPK1	4435880	4432880	9606.ENSP00000269305	9606.ENSP00000215832	0	0	0	0	0.055	0.532	0.8	0.859	0.985
CHUK	NFKB1	4443527	4433374	9606.ENSP00000359424	9606.ENSP00000226574	0	0	0	0	0.06	0.472	0.9	0.746	0.985
E2F1	CDK2	4441534	4435732	9606.ENSP00000345571	9606.ENSP00000266970	0	0	0	0	0.171	0.461	0.9	0.705	0.985
AKT1	TERT	4450372	4438520	9606.ENSP00000451828	9606.ENSP00000309572	0	0	0	0	0.055	0.379	0.9	0.783	0.985
IGFBP3	TP53	4445494	4435880	9606.ENSP00000370473	9606.ENSP00000269305	0	0	0	0	0	0	0.9	0.858	0.985
CDKN2A	RB1	4448997	4435747	9606.ENSP00000418915	9606.ENSP00000267163	0	0	0	0	0	0.085	0.9	0.849	0.985
IL10	ICAM1	4448642	4435501	9606.ENSP00000412237	9606.ENSP00000264832	0	0	0	0	0	0	0.9	0.858	0.985
JUN	CCND1	4443699	4433391	9606.ENSP00000360266	9606.ENSP00000227507	0	0	0	0	0	0	0.9	0.862	0.985
CDK1	CCND1	4446389	4433391	9606.ENSP00000378699	9606.ENSP00000227507	0	0	0	0	0.095	0.767	0.72	0.775	0.985
ESR1	NOS3	4448358	4437409	9606.ENSP00000405330	9606.ENSP00000297494	0	0	0	0	0	0.472	0.9	0.749	0.985
CDK6	CCNB1	4435642	4434484	9606.ENSP00000265734	9606.ENSP00000256442	0	0	0	0	0.152	0.265	0.9	0.793	0.985
BAX	TP53	4437004	4435880	9606.ENSP00000293288	9606.ENSP00000269305	0	0	0	0	0.05	0.578	0.9	0.669	0.984
CYCS	HSPB1	4438356	4434059	9606.ENSP00000307786	9606.ENSP00000248553	0	0	0	0	0	0.379	0.9	0.765	0.984
TNF	IL6	4448041	4447254	9606.ENSP00000398698	9606.ENSP00000385675	0	0	0	0	0.123	0	0	0.982	0.984
FGFR2	FGF23	4448546	4433694	9606.ENSP00000410294	9606.ENSP00000237837	0	0	0	0	0.049	0.65	0.9	0.595	0.984
SRC	IGF1	4444215	4437883	9606.ENSP00000362680	9606.ENSP00000302665	0	0	0	0	0	0.262	0.9	0.811	0.984
TNF	NOS2	4448041	4439909	9606.ENSP00000398698	9606.ENSP00000327251	0	0	0	0	0.063	0	0.9	0.844	0.984
IL6	JUN	4447254	4443699	9606.ENSP00000385675	9606.ENSP00000360266	0	0	0	0	0.053	0	0.9	0.85	0.984
TOP2A	CCNA2	4448614	4436109	9606.ENSP00000411532	9606.ENSP00000274026	0	0	0	0	0.967	0.05	0	0.544	0.984
EGF	STAT3	4435570	4435468	9606.ENSP00000265171	9606.ENSP00000264657	0	0	0	0	0	0	0.9	0.853	0.984
AVP	OXTR	4445364	4439675	9606.ENSP00000369647	9606.ENSP00000324270	0	0	0	0	0	0.379	0.9	0.764	0.984
BCL2	TP53	4446777	4435880	9606.ENSP00000381185	9606.ENSP00000269305	0	0	0	0	0.05	0.525	0.9	0.705	0.984
IL6	IL1B	4447254	4435241	9606.ENSP00000385675	9606.ENSP00000263341	0	0	0	0	0.43	0	0	0.973	0.984
BCL2	BAK1	4446777	4444397	9606.ENSP00000381185	9606.ENSP00000363591	0	0	0	0.675	0	0.826	0.9	0.516	0.984
TNF	MAPK14	4448041	4433482	9606.ENSP00000398698	9606.ENSP00000229795	0	0	0	0	0	0	0.9	0.85	0.984
CBS	MTR	4446786	4442697	9606.ENSP00000381234	9606.ENSP00000355536	0.055	0	0	0	0.062	0	0.9	0.844	0.984
CYCS	SDHA	4438356	4435517	9606.ENSP00000307786	9606.ENSP00000264932	0.052	0	0	0	0.195	0	0.9	0.811	0.983
EDN1	EDN2	4445200	4443976	9606.ENSP00000368683	9606.ENSP00000361668	0	0	0	0.8	0	0.809	0.9	0.921	0.983
TNFSF11	FOS	4446858	4438204	9606.ENSP00000381775	9606.ENSP00000306245	0	0	0	0	0	0	0.9	0.842	0.983
CCNA2	RB1	4436109	4435747	9606.ENSP00000274026	9606.ENSP00000267163	0	0	0	0	0.108	0.451	0.9	0.698	0.983
VEGFA	JUN	4451310	4443699	9606.ENSP00000478570	9606.ENSP00000360266	0	0	0	0	0.066	0.261	0.9	0.794	0.983
CXCL2	CXCL8	4449392	4438229	9606.ENSP00000427279	9606.ENSP00000306512	0	0	0	0.874	0.824	0	0.9	0.767	0.983
MYC	ESR1	4451407	4448358	9606.ENSP00000479618	9606.ENSP00000405330	0	0	0	0	0	0.442	0.9	0.721	0.983
MMACHC	MTR	4447043	4442697	9606.ENSP00000383840	9606.ENSP00000355536	0	0	0	0	0.062	0.379	0.9	0.756	0.983
IL6	STAT1	4447254	4442456	9606.ENSP00000385675	9606.ENSP00000354394	0	0	0	0	0.058	0.163	0.9	0.818	0.983
IL6	RELA	4447254	4447098	9606.ENSP00000385675	9606.ENSP00000384273	0	0	0	0	0	0.223	0.9	0.804	0.983
CXCL8	STAT3	4438229	4435468	9606.ENSP00000306512	9606.ENSP00000264657	0	0	0	0	0	0	0.9	0.838	0.983
FYN	CAV1	4441647	4440933	9606.ENSP00000346671	9606.ENSP00000339191	0	0	0	0	0	0.389	0.9	0.743	0.983
MYC	GSK3B	4451407	4439717	9606.ENSP00000479618	9606.ENSP00000324806	0	0	0	0	0.063	0.391	0.9	0.732	0.982
IL6	FOS	4447254	4438204	9606.ENSP00000385675	9606.ENSP00000306245	0	0	0	0	0.088	0	0.9	0.819	0.982
STAT1	MAPK14	4442456	4433482	9606.ENSP00000354394	9606.ENSP00000229795	0	0	0	0	0.06	0.406	0.9	0.718	0.982
BCL2L1	STAT5B	4437866	4437006	9606.ENSP00000302564	9606.ENSP00000293328	0	0	0	0	0	0.084	0.9	0.819	0.982
TNF	PPARG	4448041	4436745	9606.ENSP00000398698	9606.ENSP00000287820	0	0	0	0	0	0	0.9	0.827	0.982
VEGFA	SERPINE1	4451310	4433266	9606.ENSP00000478570	9606.ENSP00000223095	0	0	0	0	0.076	0	0.9	0.821	0.982
NOS3	KDR	4437409	4435337	9606.ENSP00000297494	9606.ENSP00000263923	0	0	0	0	0.062	0	0.9	0.832	0.982
IL6	CCL2	4447254	4433339	9606.ENSP00000385675	9606.ENSP00000225831	0	0	0	0	0.267	0	0	0.977	0.982
ARRB1	MAPK1	4448521	4432880	9606.ENSP00000409581	9606.ENSP00000215832	0	0	0	0	0.061	0.458	0.9	0.694	0.982
GSK3B	TP53	4439717	4435880	9606.ENSP00000324806	9606.ENSP00000269305	0	0	0	0	0	0.447	0.9	0.712	0.982
IL6	MAPK1	4447254	4432880	9606.ENSP00000385675	9606.ENSP00000215832	0	0	0	0	0	0	0.9	0.834	0.982
ESR1	FOS	4448358	4438204	9606.ENSP00000405330	9606.ENSP00000306245	0	0	0	0	0	0.475	0.9	0.688	0.982
CBS	BHMT	4446786	4436127	9606.ENSP00000381234	9606.ENSP00000274353	0.055	0	0	0	0.062	0	0.9	0.828	0.982
AVP	OXT	4445364	4433016	9606.ENSP00000369647	9606.ENSP00000217386	0	0	0	0.968	0.829	0	0.9	0.954	0.982
CASP3	FADD	4438651	4437802	9606.ENSP00000311032	9606.ENSP00000301838	0	0	0	0	0	0.076	0.9	0.819	0.981
CDKN1A	RB1	4447168	4435747	9606.ENSP00000384849	9606.ENSP00000267163	0	0	0	0	0.055	0.41	0.9	0.699	0.981
STAT5A	CSF2	4441128	4437349	9606.ENSP00000341208	9606.ENSP00000296871	0	0	0	0	0	0	0.9	0.818	0.981
MMP9	STAT3	4443919	4435468	9606.ENSP00000361405	9606.ENSP00000264657	0	0	0	0	0	0	0.9	0.824	0.981
LEP	CRP	4438805	4434405	9606.ENSP00000312652	9606.ENSP00000255030	0	0	0	0	0	0.379	0	0.97	0.981
FGF1	FGF2	4451524	4435443	9606.ENSP00000480791	9606.ENSP00000264498	0	0	0	0.937	0.077	0.799	0.9	0.938	0.981
AKT1	CAV1	4450372	4440933	9606.ENSP00000451828	9606.ENSP00000339191	0	0	0	0	0	0.057	0.9	0.815	0.981
STAT3	CCL2	4435468	4433339	9606.ENSP00000264657	9606.ENSP00000225831	0	0	0	0	0	0	0.9	0.824	0.981
MYC	DNMT3A	4451407	4435481	9606.ENSP00000479618	9606.ENSP00000264709	0	0	0	0	0	0.379	0.9	0.723	0.981
TNF	FADD	4448041	4437802	9606.ENSP00000398698	9606.ENSP00000301838	0	0	0	0	0	0.456	0.9	0.688	0.981
CSF2	STAT5B	4437349	4437006	9606.ENSP00000296871	9606.ENSP00000293328	0	0	0	0	0	0	0.9	0.818	0.981
CDKN2A	CDKN1A	4448997	4447168	9606.ENSP00000418915	9606.ENSP00000384849	0	0	0	0	0.081	0	0.9	0.815	0.981
CDKN1A	JUN	4447168	4443699	9606.ENSP00000384849	9606.ENSP00000360266	0	0	0	0	0.079	0.305	0.9	0.743	0.981
CASP1	CASP8	4449658	4442125	9606.ENSP00000433138	9606.ENSP00000351273	0	0	0	0.578	0.124	0.86	0.8	0.774	0.981
MYC	LEF1	4451407	4435569	9606.ENSP00000479618	9606.ENSP00000265165	0	0	0	0	0	0	0.9	0.82	0.981
STAT5B	MAPK1	4437006	4432880	9606.ENSP00000293328	9606.ENSP00000215832	0	0	0	0	0.061	0.311	0.9	0.742	0.981
TNF	FOS	4448041	4438204	9606.ENSP00000398698	9606.ENSP00000306245	0	0	0	0	0	0	0.9	0.819	0.981
PTPN1	LEP	4443784	4438805	9606.ENSP00000360683	9606.ENSP00000312652	0	0	0	0	0	0	0.9	0.813	0.98
VEGFA	EPAS1	4451310	4435307	9606.ENSP00000478570	9606.ENSP00000263734	0	0	0	0	0.088	0.278	0.9	0.741	0.98
STAT5A	IL4	4441128	4433533	9606.ENSP00000341208	9606.ENSP00000231449	0	0	0	0	0	0	0.9	0.81	0.98
PTGS2	STAT3	4442894	4435468	9606.ENSP00000356438	9606.ENSP00000264657	0	0	0	0	0	0	0.9	0.81	0.98
CD14	LBP	4438033	4433018	9606.ENSP00000304236	9606.ENSP00000217407	0	0	0	0	0.063	0.379	0.9	0.712	0.98
IRF1	IFNG	4433930	4433446	9606.ENSP00000245414	9606.ENSP00000229135	0	0	0	0	0.089	0	0.9	0.805	0.98
AKT1	EDN1	4450372	4445200	9606.ENSP00000451828	9606.ENSP00000368683	0	0	0	0	0.061	0	0.9	0.806	0.98
STAT5A	BCL2L1	4441128	4437866	9606.ENSP00000341208	9606.ENSP00000302564	0	0	0	0	0	0.084	0.9	0.804	0.98
RELA	JUN	4447098	4443699	9606.ENSP00000384273	9606.ENSP00000360266	0	0	0	0	0.069	0.457	0.9	0.667	0.98
PCNA	TYMS	4445167	4439011	9606.ENSP00000368458	9606.ENSP00000315644	0	0	0	0	0.962	0.132	0	0.453	0.98
CDK1	E2F1	4446389	4441534	9606.ENSP00000378699	9606.ENSP00000345571	0	0	0	0	0.256	0.461	0.9	0.579	0.98
STAT3	IL4	4435468	4433533	9606.ENSP00000264657	9606.ENSP00000231449	0	0	0	0	0	0	0.9	0.817	0.98
SRC	EZR	4444215	4442801	9606.ENSP00000362680	9606.ENSP00000356042	0	0	0	0	0	0.063	0.9	0.806	0.98
RELA	IRF1	4447098	4433930	9606.ENSP00000384273	9606.ENSP00000245414	0	0	0	0	0.062	0.379	0.9	0.709	0.98
CXCL8	CCL2	4438229	4433339	9606.ENSP00000306512	9606.ENSP00000225831	0	0	0	0	0.278	0.667	0	0.925	0.98
STAT3	FGF2	4435468	4435443	9606.ENSP00000264657	9606.ENSP00000264498	0	0	0	0	0	0	0.9	0.808	0.98
VEGFA	IGF2	4451310	4447717	9606.ENSP00000478570	9606.ENSP00000391826	0	0	0	0	0.069	0	0.9	0.809	0.98
CDKN1A	CASP3	4447168	4438651	9606.ENSP00000384849	9606.ENSP00000311032	0	0	0	0	0	0.682	0.8	0.718	0.98
CSF2	STAT3	4437349	4435468	9606.ENSP00000296871	9606.ENSP00000264657	0	0	0	0	0	0	0.9	0.805	0.979
PLG	MMP3	4438461	4437610	9606.ENSP00000308938	9606.ENSP00000299855	0	0	0	0	0.063	0.379	0.9	0.682	0.979
MAPK8	WNT5A	4446429	4435460	9606.ENSP00000378974	9606.ENSP00000264634	0	0	0	0	0.051	0	0.9	0.799	0.979
CXCL2	CXCL10	4449392	4438146	9606.ENSP00000427279	9606.ENSP00000305651	0	0	0	0	0.139	0	0.9	0.784	0.979
AKT1	RAF1	4450372	4434195	9606.ENSP00000451828	9606.ENSP00000251849	0	0	0	0.581	0	0.695	0.9	0.879	0.979
SRC	MMP9	4444215	4443919	9606.ENSP00000362680	9606.ENSP00000361405	0	0	0	0	0.088	0	0.9	0.796	0.979
TNF	CD40LG	4448041	4443586	9606.ENSP00000398698	9606.ENSP00000359663	0	0	0	0	0.076	0	0.9	0.8	0.979
STAT3	MMP2	4435468	4433061	9606.ENSP00000264657	9606.ENSP00000219070	0	0	0	0	0	0	0.9	0.799	0.979
BRCA1	CCNA2	4448999	4436109	9606.ENSP00000418960	9606.ENSP00000274026	0	0	0	0	0.362	0.379	0.9	0.549	0.979
ESR1	JUN	4448358	4443699	9606.ENSP00000405330	9606.ENSP00000360266	0	0	0	0	0	0.472	0.9	0.646	0.979
VEGFA	EGFR	4451310	4436186	9606.ENSP00000478570	9606.ENSP00000275493	0	0	0	0	0.089	0	0.6	0.947	0.979
AKT1	PIK3CG	4450372	4442215	9606.ENSP00000451828	9606.ENSP00000352121	0	0	0	0	0.063	0.174	0.9	0.771	0.979
SERPINE1	TGFB1	4433266	4433189	9606.ENSP00000223095	9606.ENSP00000221930	0	0	0	0	0.088	0	0.9	0.795	0.979
CYCS	BAX	4438356	4437004	9606.ENSP00000307786	9606.ENSP00000293288	0	0	0	0	0.042	0.328	0.9	0.723	0.979
TNF	ADAM17	4448041	4438549	9606.ENSP00000398698	9606.ENSP00000309968	0	0	0	0	0.061	0.379	0.9	0.692	0.979
PPARA	ACADM	4447242	4443625	9606.ENSP00000385523	9606.ENSP00000359871	0	0	0	0	0.063	0	0.9	0.794	0.979
ALAD	ALAS2	4447356	4440351	9606.ENSP00000386284	9606.ENSP00000332369	0.111	0	0	0	0.063	0	0.9	0.779	0.979
CTH	MTR	4443637	4442697	9606.ENSP00000359976	9606.ENSP00000355536	0.184	0	0	0	0.064	0	0.9	0.767	0.979
CXCL2	IL10	4449392	4448642	9606.ENSP00000427279	9606.ENSP00000412237	0	0	0	0	0.064	0	0.9	0.801	0.979
ADAM17	EGF	4438549	4435570	9606.ENSP00000309968	9606.ENSP00000265171	0	0	0	0	0	0	0.9	0.806	0.979
VEGFA	MMP2	4451310	4433061	9606.ENSP00000478570	9606.ENSP00000219070	0	0	0	0	0.065	0	0.8	0.899	0.979
STAT5B	IL4	4437006	4433533	9606.ENSP00000293328	9606.ENSP00000231449	0	0	0	0	0	0	0.9	0.793	0.978
MAPK8	ERBB2	4446429	4435897	9606.ENSP00000378974	9606.ENSP00000269571	0	0	0	0	0	0	0.9	0.788	0.978
AKT1	SRC	4450372	4444215	9606.ENSP00000451828	9606.ENSP00000362680	0	0	0.391	0.562	0.097	0.546	0.9	0.96	0.978
JUN	CCL2	4443699	4433339	9606.ENSP00000360266	9606.ENSP00000225831	0	0	0	0	0.062	0	0.9	0.792	0.978
CXCL2	CXCL11	4449392	4438264	9606.ENSP00000427279	9606.ENSP00000306884	0	0	0	0	0.107	0.232	0.9	0.717	0.978
HADHA	ACADM	4445432	4443625	9606.ENSP00000370023	9606.ENSP00000359871	0.048	0	0	0	0.264	0.085	0.9	0.722	0.978
RELA	IL2	4447098	4433376	9606.ENSP00000384273	9606.ENSP00000226730	0	0	0	0	0	0.342	0.9	0.694	0.978
MET	STAT3	4439114	4435468	9606.ENSP00000317272	9606.ENSP00000264657	0	0	0	0	0.062	0.432	0.9	0.647	0.978
FYN	STAT3	4441647	4435468	9606.ENSP00000346671	9606.ENSP00000264657	0	0	0	0	0	0.365	0.9	0.684	0.978
JUN	GSK3B	4443699	4439717	9606.ENSP00000360266	9606.ENSP00000324806	0	0	0	0	0	0.541	0.9	0.574	0.978
EGF	SERPINE1	4435570	4433266	9606.ENSP00000265171	9606.ENSP00000223095	0	0	0	0	0	0	0.9	0.798	0.978
AKT1	IL2	4450372	4433376	9606.ENSP00000451828	9606.ENSP00000226730	0	0	0	0	0	0	0.9	0.793	0.978
ARG1	NOS2	4441926	4439909	9606.ENSP00000349446	9606.ENSP00000327251	0	0	0	0	0.06	0.086	0.9	0.782	0.978
IL10	STAT4	4448642	4446006	9606.ENSP00000412237	9606.ENSP00000376134	0	0	0	0	0	0.096	0.9	0.779	0.978
IL1B	MAPK14	4435241	4433482	9606.ENSP00000263341	9606.ENSP00000229795	0	0	0	0	0	0	0.9	0.79	0.978
FOS	MAPK14	4438204	4433482	9606.ENSP00000306245	9606.ENSP00000229795	0	0	0	0	0	0.264	0.9	0.733	0.978
IL6	SPP1	4447254	4446370	9606.ENSP00000385675	9606.ENSP00000378517	0	0	0	0	0.06	0	0.9	0.793	0.978
E2F1	CDK4	4441534	4434582	9606.ENSP00000345571	9606.ENSP00000257904	0	0	0	0	0.124	0.168	0.9	0.732	0.977
HIF1A	TP53	4449842	4435880	9606.ENSP00000437955	9606.ENSP00000269305	0	0	0	0	0	0.379	0.9	0.674	0.977
JUN	HMOX1	4443699	4432912	9606.ENSP00000360266	9606.ENSP00000216117	0	0	0	0	0	0	0.9	0.784	0.977
GRIN1	FYN	4443769	4441647	9606.ENSP00000360608	9606.ENSP00000346671	0	0	0	0	0.061	0.362	0.9	0.663	0.977
BCL2L1	MAPK1	4437866	4432880	9606.ENSP00000302564	9606.ENSP00000215832	0	0	0	0	0	0	0.9	0.786	0.977
TERT	TP53	4438520	4435880	9606.ENSP00000309572	9606.ENSP00000269305	0	0	0	0	0.063	0.111	0.9	0.761	0.977
PCNA	CDK4	4445167	4434582	9606.ENSP00000368458	9606.ENSP00000257904	0	0	0	0	0.31	0.472	0.9	0.466	0.977
INS	CAV1	4446661	4440933	9606.ENSP00000380432	9606.ENSP00000339191	0	0	0	0	0	0	0.9	0.775	0.976
TNF	STAT3	4448041	4435468	9606.ENSP00000398698	9606.ENSP00000264657	0	0	0	0	0	0	0.9	0.774	0.976
INS	LEP	4446661	4438805	9606.ENSP00000380432	9606.ENSP00000312652	0	0	0	0	0	0	0	0.975	0.976
IL1B	NFKB1	4435241	4433374	9606.ENSP00000263341	9606.ENSP00000226574	0	0	0	0	0.131	0	0.9	0.747	0.976
STAT5A	STAT3	4441128	4435468	9606.ENSP00000341208	9606.ENSP00000264657	0	0	0	0.745	0.095	0.688	0.9	0.939	0.976
NEDD4	PTEN	4449308	4443848	9606.ENSP00000424827	9606.ENSP00000361021	0	0	0	0	0.05	0.454	0.9	0.593	0.976
ARG1	OTC	4441926	4432619	9606.ENSP00000349446	9606.ENSP00000039007	0	0	0	0	0.084	0.157	0.9	0.732	0.976
MYC	TNF	4451407	4448041	9606.ENSP00000479618	9606.ENSP00000398698	0	0	0	0	0.062	0	0.9	0.769	0.976
TP53	PML	4435880	4435801	9606.ENSP00000269305	9606.ENSP00000268058	0	0	0	0	0.061	0.518	0.9	0.543	0.976
CDKN1A	STAT3	4447168	4435468	9606.ENSP00000384849	9606.ENSP00000264657	0	0	0	0	0.074	0.513	0.9	0.547	0.976
CDKN1A	E2F1	4447168	4441534	9606.ENSP00000384849	9606.ENSP00000345571	0	0	0	0	0.052	0.435	0.9	0.617	0.976
BAK1	TP53	4444397	4435880	9606.ENSP00000363591	9606.ENSP00000269305	0	0	0	0	0.062	0.461	0.9	0.571	0.975
ABCB1	TP53	4451279	4435880	9606.ENSP00000478255	9606.ENSP00000269305	0	0	0	0	0	0	0.9	0.76	0.975
MAPK8	IL2	4446429	4433376	9606.ENSP00000378974	9606.ENSP00000226730	0	0	0	0	0	0	0.9	0.769	0.975
STAT4	JUN	4446006	4443699	9606.ENSP00000376134	9606.ENSP00000360266	0	0	0	0	0	0.465	0.9	0.578	0.975
STAT2	IRF1	4439022	4433930	9606.ENSP00000315768	9606.ENSP00000245414	0	0	0	0	0.174	0	0.9	0.723	0.975
STAT1	STAT5A	4442456	4441128	9606.ENSP00000354394	9606.ENSP00000341208	0	0	0	0.729	0.061	0.695	0.9	0.848	0.975
ALOX5	PTGS2	4444382	4442894	9606.ENSP00000363512	9606.ENSP00000356438	0	0	0	0	0.08	0	0.9	0.758	0.975
ICAM1	STAT3	4435501	4435468	9606.ENSP00000264832	9606.ENSP00000264657	0	0	0	0	0.084	0	0.9	0.749	0.975
IGFBP3	PLG	4445494	4438461	9606.ENSP00000370473	9606.ENSP00000308938	0	0	0	0	0	0.379	0.9	0.64	0.975
STAT1	FYN	4442456	4441647	9606.ENSP00000354394	9606.ENSP00000346671	0	0	0	0	0	0.432	0.9	0.601	0.975
AKT1	CHUK	4450372	4443527	9606.ENSP00000451828	9606.ENSP00000359424	0	0	0	0.593	0	0.682	0.9	0.673	0.975
ARG1	ODC1	4441926	4433616	9606.ENSP00000349446	9606.ENSP00000234111	0.11	0	0	0	0.064	0	0.9	0.737	0.975
BRCA1	CDK2	4448999	4435732	9606.ENSP00000418960	9606.ENSP00000266970	0	0	0	0	0.158	0.379	0.9	0.59	0.975
TNF	IFNG	4448041	4433446	9606.ENSP00000398698	9606.ENSP00000229135	0	0	0	0	0.152	0.379	0	0.957	0.975
CDK6	CDK4	4435642	4434582	9606.ENSP00000265734	9606.ENSP00000257904	0	0	0.44	0.97	0.061	0.752	0.9	0.961	0.975
PRKCD	PRKCB	4446312	4438120	9606.ENSP00000378217	9606.ENSP00000305355	0	0	0	0.89	0	0.752	0.9	0.632	0.975
FLT1	FLT4	4436489	4434983	9606.ENSP00000282397	9606.ENSP00000261937	0	0	0	0.889	0.062	0.732	0.9	0.902	0.975
FGF2	MAPK1	4435443	4432880	9606.ENSP00000264498	9606.ENSP00000215832	0	0	0	0	0	0	0.9	0.752	0.974
CYP2E1	ADH1C	4449959	4449347	9606.ENSP00000440689	9606.ENSP00000426083	0.043	0	0	0	0.128	0	0.9	0.73	0.974
PRKCD	PRKCQ	4446312	4435203	9606.ENSP00000378217	9606.ENSP00000263125	0	0	0	0.968	0	0.752	0.9	0.787	0.974
SRC	NOS2	4444215	4439909	9606.ENSP00000362680	9606.ENSP00000327251	0	0	0	0	0.064	0.394	0.9	0.6	0.974
AKT1	IKBKB	4450372	4449555	9606.ENSP00000451828	9606.ENSP00000430684	0	0	0	0.601	0	0.682	0.9	0.574	0.974
EZR	FAS	4442801	4441783	9606.ENSP00000356042	9606.ENSP00000347979	0	0	0	0	0	0.503	0.9	0.53	0.974
CXCL8	MAPK14	4438229	4433482	9606.ENSP00000306512	9606.ENSP00000229795	0	0	0	0	0	0	0.9	0.757	0.974
CDK1	RB1	4446389	4435747	9606.ENSP00000378699	9606.ENSP00000267163	0	0	0	0	0.063	0.478	0.9	0.547	0.974
STAT5A	CCND1	4441128	4433391	9606.ENSP00000341208	9606.ENSP00000227507	0	0	0	0	0.049	0.067	0.9	0.744	0.974
STAT5B	CCND1	4437006	4433391	9606.ENSP00000293328	9606.ENSP00000227507	0	0	0	0	0.049	0.067	0.9	0.744	0.974
SRC	MMP2	4444215	4433061	9606.ENSP00000362680	9606.ENSP00000219070	0	0	0	0	0.055	0	0.9	0.748	0.974
PPARG	TP53	4436745	4435880	9606.ENSP00000287820	9606.ENSP00000269305	0	0	0	0	0	0	0.9	0.751	0.974
CYP2E1	ADH1B	4449959	4438237	9606.ENSP00000440689	9606.ENSP00000306606	0.043	0	0	0	0.128	0	0.9	0.732	0.974
CDK2	CDK6	4435732	4435642	9606.ENSP00000266970	9606.ENSP00000265734	0	0	0.439	0.927	0.108	0.711	0.9	0.908	0.974
PTGS2	IL1B	4442894	4435241	9606.ENSP00000356438	9606.ENSP00000263341	0	0	0	0	0.561	0	0	0.943	0.974
SDHB	CYCS	4444576	4438356	9606.ENSP00000364649	9606.ENSP00000307786	0	0	0	0	0.219	0	0.9	0.698	0.974
ARRB1	SRC	4448521	4444215	9606.ENSP00000409581	9606.ENSP00000362680	0	0	0	0	0.063	0.445	0.9	0.562	0.974
LCN2	SLPI	4444080	4441219	9606.ENSP00000362108	9606.ENSP00000342082	0	0	0	0	0.342	0	0.9	0.641	0.974
HIF1A	EGFR	4449842	4436186	9606.ENSP00000437955	9606.ENSP00000275493	0	0	0	0	0	0	0.9	0.743	0.973
E2F1	CDK6	4441534	4435642	9606.ENSP00000345571	9606.ENSP00000265734	0	0	0	0	0.063	0.168	0.9	0.699	0.973
E2F1	CCND1	4441534	4433391	9606.ENSP00000345571	9606.ENSP00000227507	0	0	0	0	0.065	0.132	0.9	0.713	0.973
CYP2E1	ALDH2	4449959	4434937	9606.ENSP00000440689	9606.ENSP00000261733	0	0	0	0	0.062	0.085	0.9	0.731	0.973
PTEN	CSNK2A1	4443848	4433007	9606.ENSP00000361021	9606.ENSP00000217244	0	0	0	0	0.063	0.423	0.9	0.572	0.973
TNF	CXCL8	4448041	4438229	9606.ENSP00000398698	9606.ENSP00000306512	0	0	0	0	0.156	0	0	0.97	0.973
FYN	STAT5A	4441647	4441128	9606.ENSP00000346671	9606.ENSP00000341208	0	0	0	0	0.063	0.157	0.9	0.701	0.973
CAV1	EGF	4440933	4435570	9606.ENSP00000339191	9606.ENSP00000265171	0	0	0	0	0	0	0.9	0.746	0.973
IL10	IL1A	4448642	4435240	9606.ENSP00000412237	9606.ENSP00000263339	0	0	0	0	0.063	0	0.9	0.738	0.973
AKT1	SOD2	4450372	4450194	9606.ENSP00000451828	9606.ENSP00000446252	0	0	0	0	0	0	0.9	0.745	0.973
ALOX5	PTGS1	4444382	4442503	9606.ENSP00000363512	9606.ENSP00000354612	0	0	0	0	0.095	0	0.9	0.728	0.973
CHUK	PRKCB	4443527	4438120	9606.ENSP00000359424	9606.ENSP00000305355	0	0	0	0.565	0	0.717	0.9	0.254	0.973
ADH1C	ADH1B	4449347	4438237	9606.ENSP00000426083	9606.ENSP00000306606	0	0	0.449	0.986	0.179	0.692	0.9	0.921	0.973
EGF	WNT5A	4435570	4435460	9606.ENSP00000265171	9606.ENSP00000264634	0	0	0	0	0.054	0.126	0.9	0.713	0.973
PRKCD	TP53	4446312	4435880	9606.ENSP00000378217	9606.ENSP00000269305	0	0	0	0	0	0.379	0.9	0.608	0.973
SPP1	MMP3	4446370	4437610	9606.ENSP00000378517	9606.ENSP00000299855	0	0	0	0	0.062	0.379	0.9	0.578	0.972
CDKN1A	MAPK8	4447168	4446429	9606.ENSP00000384849	9606.ENSP00000378974	0	0	0	0	0	0.379	0.9	0.593	0.972
IL6	ERBB2	4447254	4435897	9606.ENSP00000385675	9606.ENSP00000269571	0	0	0	0	0	0	0.9	0.739	0.972
STAT1	STAT3	4442456	4435468	9606.ENSP00000354394	9606.ENSP00000264657	0	0	0	0.948	0.062	0.713	0.9	0.95	0.972
PTPN1	STAT5A	4443784	4441128	9606.ENSP00000360683	9606.ENSP00000341208	0	0	0	0	0.064	0.435	0.9	0.545	0.972
MAPK14	HMOX1	4433482	4432912	9606.ENSP00000229795	9606.ENSP00000216117	0	0	0	0	0	0	0.9	0.735	0.972
HADHA	ACADS	4445432	4433826	9606.ENSP00000370023	9606.ENSP00000242592	0.048	0	0	0	0.123	0.085	0.9	0.694	0.972
STAT1	IRF1	4442456	4433930	9606.ENSP00000354394	9606.ENSP00000245414	0	0	0	0	0.387	0.379	0	0.932	0.972
CXCL10	STAT3	4438146	4435468	9606.ENSP00000305651	9606.ENSP00000264657	0	0	0	0	0	0	0.9	0.736	0.972
PTPN1	STAT5B	4443784	4437006	9606.ENSP00000360683	9606.ENSP00000293328	0	0	0	0	0.064	0.435	0.9	0.545	0.972
IKBKB	PRKCB	4449555	4438120	9606.ENSP00000430684	9606.ENSP00000305355	0	0	0	0.565	0	0.697	0.9	0.297	0.972
ESR1	STAT5A	4448358	4441128	9606.ENSP00000405330	9606.ENSP00000341208	0	0	0	0	0.065	0.472	0.9	0.51	0.972
FYN	STAT5B	4441647	4437006	9606.ENSP00000346671	9606.ENSP00000293328	0	0	0	0	0.063	0.157	0.9	0.686	0.972
NFE2L2	JUN	4446632	4443699	9606.ENSP00000380252	9606.ENSP00000360266	0	0	0	0	0	0.4	0.9	0.578	0.972
IL1A	IL4	4435240	4433533	9606.ENSP00000263339	9606.ENSP00000231449	0	0	0	0	0	0	0.9	0.732	0.972
TNF	STAT1	4448041	4442456	9606.ENSP00000398698	9606.ENSP00000354394	0	0	0	0	0.061	0	0.9	0.73	0.972
MYC	RELA	4451407	4447098	9606.ENSP00000479618	9606.ENSP00000384273	0	0	0	0	0	0.379	0.9	0.587	0.972
SRC	PGR	4444215	4439740	9606.ENSP00000362680	9606.ENSP00000325120	0	0	0	0	0.062	0.407	0.9	0.56	0.972
IL10	IL4	4448642	4433533	9606.ENSP00000412237	9606.ENSP00000231449	0	0	0	0	0	0	0	0.972	0.972
CASP9	CASP3	4440164	4438651	9606.ENSP00000330237	9606.ENSP00000311032	0	0	0	0.833	0.061	0.682	0.9	0.971	0.972
RUNX2	MAPK1	4443746	4432880	9606.ENSP00000360493	9606.ENSP00000215832	0	0	0	0	0	0	0.9	0.74	0.972
F7	F9	4444589	4433043	9606.ENSP00000364731	9606.ENSP00000218099	0	0	0.425	0.897	0.538	0.379	0.9	0.91	0.972
DNMT3B	DNMT3A	4440033	4435481	9606.ENSP00000328547	9606.ENSP00000264709	0	0	0	0.938	0.062	0.709	0.9	0.957	0.972
ALOX15	IL4	4450608	4433533	9606.ENSP00000458832	9606.ENSP00000231449	0	0	0	0	0	0	0.9	0.734	0.972
TNF	CHUK	4448041	4443527	9606.ENSP00000398698	9606.ENSP00000359424	0	0	0	0	0.061	0.374	0.9	0.592	0.972
FOS	NR3C1	4438204	4433539	9606.ENSP00000306245	9606.ENSP00000231509	0	0	0	0	0.055	0.299	0.9	0.634	0.972
STAT1	MAPK1	4442456	4432880	9606.ENSP00000354394	9606.ENSP00000215832	0	0	0	0	0.06	0.263	0.9	0.649	0.972
ESR1	MAPK1	4448358	4432880	9606.ENSP00000405330	9606.ENSP00000215832	0	0	0	0	0	0.399	0.9	0.57	0.971
TP53	CSNK2A1	4435880	4433007	9606.ENSP00000269305	9606.ENSP00000217244	0	0	0	0	0	0.513	0.9	0.456	0.971
EGFR	ERBB2	4436186	4435897	9606.ENSP00000275493	9606.ENSP00000269571	0	0	0	0.941	0.077	0.699	0.9	0.967	0.971
JUN	IL2	4443699	4433376	9606.ENSP00000360266	9606.ENSP00000226730	0	0	0	0	0	0.313	0.9	0.621	0.971
JUN	CXCL8	4443699	4438229	9606.ENSP00000360266	9606.ENSP00000306512	0	0	0	0	0.095	0.294	0.8	0.799	0.971
STAT4	IFNG	4446006	4433446	9606.ENSP00000376134	9606.ENSP00000229135	0	0	0	0	0.087	0	0.9	0.71	0.971
AKT1	CAT	4450372	4433793	9606.ENSP00000451828	9606.ENSP00000241052	0.043	0	0	0	0	0.073	0.9	0.715	0.971
STAT3	MAPK14	4435468	4433482	9606.ENSP00000264657	9606.ENSP00000229795	0	0	0	0	0.06	0.05	0.9	0.722	0.971
BRCA1	CDK4	4448999	4434582	9606.ENSP00000418960	9606.ENSP00000257904	0	0	0	0	0.087	0.379	0.9	0.56	0.971
COL5A1	PLOD1	4443819	4432760	9606.ENSP00000360882	9606.ENSP00000196061	0	0	0	0	0.12	0.256	0.9	0.62	0.971
EDN1	SRC	4445200	4444215	9606.ENSP00000368683	9606.ENSP00000362680	0	0	0	0	0.06	0	0.9	0.722	0.971
MAPK9	FOS	4447857	4438204	9606.ENSP00000394560	9606.ENSP00000306245	0	0	0	0	0	0.331	0.9	0.612	0.971
VEGFA	FGF2	4451310	4435443	9606.ENSP00000478570	9606.ENSP00000264498	0	0	0	0	0	0	0	0.97	0.971
TP53	NR3C1	4435880	4433539	9606.ENSP00000269305	9606.ENSP00000231509	0	0	0	0	0	0.379	0.9	0.572	0.971
TNF	CCL2	4448041	4433339	9606.ENSP00000398698	9606.ENSP00000225831	0	0	0	0	0.062	0	0	0.969	0.971
ERBB4	ADAM17	4441238	4438549	9606.ENSP00000342235	9606.ENSP00000309968	0	0	0	0	0	0.379	0.9	0.57	0.971
CASP9	BCL2L1	4440164	4437866	9606.ENSP00000330237	9606.ENSP00000302564	0	0	0	0	0.055	0.729	0	0.897	0.971
STAT1	STAT2	4442456	4439022	9606.ENSP00000354394	9606.ENSP00000315768	0	0	0	0.889	0.532	0.379	0.9	0.983	0.971
EDN1	MAPK1	4445200	4432880	9606.ENSP00000368683	9606.ENSP00000215832	0	0	0	0	0	0	0.9	0.713	0.97
TOP1	CASP3	4442483	4438651	9606.ENSP00000354522	9606.ENSP00000311032	0	0	0	0	0	0.379	0.9	0.556	0.97
HIF1A	JUN	4449842	4443699	9606.ENSP00000437955	9606.ENSP00000360266	0	0	0	0	0	0.379	0.9	0.561	0.97
ESR1	IGF1	4448358	4437883	9606.ENSP00000405330	9606.ENSP00000302665	0	0	0	0	0.062	0	0.9	0.715	0.97
CASP1	IL1A	4449658	4435240	9606.ENSP00000433138	9606.ENSP00000263339	0	0	0	0	0.085	0.379	0.9	0.535	0.97
FOS	CCL2	4438204	4433339	9606.ENSP00000306245	9606.ENSP00000225831	0	0	0	0	0	0	0.9	0.719	0.97
FAS	TP53	4441783	4435880	9606.ENSP00000347979	9606.ENSP00000269305	0	0	0	0	0.062	0	0.9	0.715	0.97
IGF1	SERPINE1	4437883	4433266	9606.ENSP00000302665	9606.ENSP00000223095	0	0	0	0	0	0	0.9	0.717	0.97
ARRB1	RHO	4448521	4437258	9606.ENSP00000409581	9606.ENSP00000296271	0	0	0	0	0.064	0.193	0.9	0.654	0.97
SRC	JUN	4444215	4443699	9606.ENSP00000362680	9606.ENSP00000360266	0	0	0	0	0.065	0.079	0.8	0.85	0.97
COL1A1	MMP2	4433346	4433061	9606.ENSP00000225964	9606.ENSP00000219070	0	0	0	0	0.89	0.379	0	0.6	0.97
IL6	CRP	4447254	4434405	9606.ENSP00000385675	9606.ENSP00000255030	0	0	0	0	0	0	0	0.97	0.97
CASP1	TP53	4449658	4435880	9606.ENSP00000433138	9606.ENSP00000269305	0	0	0	0	0.061	0.379	0.9	0.546	0.97
MYC	TP53	4451407	4435880	9606.ENSP00000479618	9606.ENSP00000269305	0	0	0	0	0.091	0.139	0	0.964	0.969
FOS	TP53	4438204	4435880	9606.ENSP00000306245	9606.ENSP00000269305	0	0	0	0	0	0	0.9	0.706	0.969
FGF2	KDR	4435443	4435337	9606.ENSP00000264498	9606.ENSP00000263923	0	0	0	0	0.069	0.267	0.6	0.901	0.969
GATA3	MAPK14	4445191	4433482	9606.ENSP00000368632	9606.ENSP00000229795	0	0	0	0	0	0.404	0.9	0.525	0.969
IGF1	TGFB1	4437883	4433189	9606.ENSP00000302665	9606.ENSP00000221930	0	0	0	0	0	0	0.9	0.705	0.969
COL5A1	COL3A1	4443819	4438049	9606.ENSP00000360882	9606.ENSP00000304408	0	0	0.401	0.841	0.642	0	0.9	0.803	0.969
STAT3	IL2	4435468	4433376	9606.ENSP00000264657	9606.ENSP00000226730	0	0	0	0	0	0	0.9	0.705	0.969
MMP14	MMP2	4438391	4433061	9606.ENSP00000308208	9606.ENSP00000219070	0	0	0	0.765	0.421	0.379	0.9	0.955	0.969
IL6	APOE	4447254	4434227	9606.ENSP00000385675	9606.ENSP00000252486	0	0	0	0	0	0	0.9	0.702	0.969
VEGFA	PLG	4451310	4438461	9606.ENSP00000478570	9606.ENSP00000308938	0	0	0	0	0	0	0.9	0.708	0.969
AKT1	CASP3	4450372	4438651	9606.ENSP00000451828	9606.ENSP00000311032	0	0	0	0	0.055	0.393	0	0.95	0.969
HIF1A	NOS3	4449842	4437409	9606.ENSP00000437955	9606.ENSP00000297494	0	0	0	0	0	0	0.9	0.706	0.969
LEF1	CCND1	4435569	4433391	9606.ENSP00000265165	9606.ENSP00000227507	0	0	0	0	0.05	0	0.9	0.701	0.969
MAPT	CASP3	4441081	4438651	9606.ENSP00000340820	9606.ENSP00000311032	0	0	0	0	0	0.379	0.9	0.539	0.968
CXCL11	CXCL8	4438264	4438229	9606.ENSP00000306884	9606.ENSP00000306512	0	0	0	0	0.107	0	0.9	0.678	0.968
HCRT	OXT	4437007	4433016	9606.ENSP00000293330	9606.ENSP00000217386	0	0	0	0	0.105	0	0.9	0.677	0.968
RELA	FOS	4447098	4438204	9606.ENSP00000384273	9606.ENSP00000306245	0	0	0	0	0	0.379	0.9	0.539	0.968
FGFR2	STAT3	4448546	4435468	9606.ENSP00000410294	9606.ENSP00000264657	0	0	0	0	0	0.334	0.9	0.558	0.968
TNF	NFKB1	4448041	4433374	9606.ENSP00000398698	9606.ENSP00000226574	0	0	0	0	0.108	0	0.9	0.672	0.968
EGFR	RASA1	4436186	4436131	9606.ENSP00000275493	9606.ENSP00000274376	0	0	0	0	0	0.467	0.9	0.454	0.968
FOS	PPARG	4438204	4436745	9606.ENSP00000306245	9606.ENSP00000287820	0	0	0	0	0	0.098	0.9	0.683	0.968
AR	CDK6	4444436	4435642	9606.ENSP00000363822	9606.ENSP00000265734	0	0	0	0	0	0.524	0.9	0.399	0.968
VEGFA	SPARC	4451310	4433520	9606.ENSP00000478570	9606.ENSP00000231061	0	0	0	0	0	0.379	0.9	0.537	0.968
POLA1	RB1	4445155	4435747	9606.ENSP00000368349	9606.ENSP00000267163	0	0	0	0	0.485	0.379	0.9	0.141	0.968
ESR1	TERT	4448358	4438520	9606.ENSP00000405330	9606.ENSP00000309572	0	0	0	0	0	0.043	0.9	0.695	0.968
MMP3	STAT3	4437610	4435468	9606.ENSP00000299855	9606.ENSP00000264657	0	0	0	0	0	0.379	0.9	0.527	0.968
SDHC	CYCS	4442997	4438356	9606.ENSP00000356953	9606.ENSP00000307786	0	0	0	0	0.359	0	0.9	0.543	0.968
E2F1	CCNB1	4441534	4434484	9606.ENSP00000345571	9606.ENSP00000256442	0	0	0	0	0.249	0.169	0.9	0.54	0.967
FOS	CCND1	4438204	4433391	9606.ENSP00000306245	9606.ENSP00000227507	0	0	0	0	0	0	0.9	0.685	0.967
CASP3	RB1	4438651	4435747	9606.ENSP00000311032	9606.ENSP00000267163	0	0	0	0	0	0.379	0.9	0.519	0.967
INS	EGFR	4446661	4436186	9606.ENSP00000380432	9606.ENSP00000275493	0	0	0	0	0	0	0.8	0.843	0.967
PLCG2	SRC	4451677	4444215	9606.ENSP00000482457	9606.ENSP00000362680	0	0	0	0	0.061	0.185	0.9	0.623	0.967
ADCYAP1	CALCA	4450674	4440295	9606.ENSP00000462647	9606.ENSP00000331746	0	0	0	0	0.063	0	0.9	0.676	0.967
ESR1	STAT1	4448358	4442456	9606.ENSP00000405330	9606.ENSP00000354394	0	0	0	0	0	0.448	0.9	0.458	0.967
BCL2	BAX	4446777	4437004	9606.ENSP00000381185	9606.ENSP00000293288	0	0	0	0.645	0	0.58	0.9	0.734	0.967
RELA	CCND1	4447098	4433391	9606.ENSP00000384273	9606.ENSP00000227507	0	0	0	0	0	0.313	0.9	0.559	0.967
MAPK9	MAPK8	4447857	4446429	9606.ENSP00000394560	9606.ENSP00000378974	0	0	0.446	0.981	0.069	0.667	0.9	0.956	0.967
AR	GSK3B	4444436	4439717	9606.ENSP00000363822	9606.ENSP00000324806	0	0	0	0	0	0.407	0.9	0.49	0.967
ESR2	NOS3	4441379	4437409	9606.ENSP00000343925	9606.ENSP00000297494	0	0	0	0	0	0.091	0.9	0.671	0.967
PTEN	EGFR	4443848	4436186	9606.ENSP00000361021	9606.ENSP00000275493	0	0	0	0	0	0.472	0	0.94	0.967
CPS1	GLUL	4448239	4438369	9606.ENSP00000402608	9606.ENSP00000307900	0.111	0	0	0	0.086	0.05	0.9	0.632	0.966
POLA1	CDK2	4445155	4435732	9606.ENSP00000368349	9606.ENSP00000266970	0	0	0	0	0.23	0.45	0.9	0.309	0.966
GATA3	FOS	4445191	4438204	9606.ENSP00000368632	9606.ENSP00000306245	0	0	0	0	0.061	0.464	0.9	0.417	0.966
PTPN1	MET	4443784	4439114	9606.ENSP00000360683	9606.ENSP00000317272	0	0	0	0	0.062	0.538	0.9	0.323	0.966
MMP1	STAT3	4439553	4435468	9606.ENSP00000322788	9606.ENSP00000264657	0	0	0	0	0	0	0.9	0.674	0.966
VEGFA	AKT1	4451310	4450372	9606.ENSP00000478570	9606.ENSP00000451828	0	0	0	0	0.063	0.342	0	0.95	0.966
TLR4	LBP	4444300	4433018	9606.ENSP00000363089	9606.ENSP00000217407	0	0	0	0	0.063	0	0.9	0.669	0.966
CASP8	IL1B	4442125	4435241	9606.ENSP00000351273	9606.ENSP00000263341	0	0	0	0	0.063	0.268	0.9	0.568	0.966
IGFBP3	MMP2	4445494	4433061	9606.ENSP00000370473	9606.ENSP00000219070	0	0	0	0	0.196	0.379	0.9	0.413	0.966
EDN1	MAPK14	4445200	4433482	9606.ENSP00000368683	9606.ENSP00000229795	0	0	0	0	0	0	0.9	0.679	0.966
DHFR	MTR	4447922	4442697	9606.ENSP00000396308	9606.ENSP00000355536	0	0	0	0	0.053	0	0.9	0.677	0.966
BCL2	CYCS	4446777	4438356	9606.ENSP00000381185	9606.ENSP00000307786	0	0	0	0	0	0.379	0.9	0.504	0.966
F2	F9	4438421	4433043	9606.ENSP00000308541	9606.ENSP00000218099	0	0	0.408	0.727	0.254	0.379	0.9	0.86	0.965
STAT1	IL2	4442456	4433376	9606.ENSP00000354394	9606.ENSP00000226730	0	0	0	0	0	0	0.9	0.672	0.965
TNF	CAV1	4448041	4440933	9606.ENSP00000398698	9606.ENSP00000339191	0	0	0	0	0	0.348	0.9	0.507	0.965
AVP	EDN1	4445364	4445200	9606.ENSP00000369647	9606.ENSP00000368683	0	0	0	0	0	0	0.9	0.667	0.965
AR	CASP8	4444436	4442125	9606.ENSP00000363822	9606.ENSP00000351273	0	0	0	0	0	0.472	0.9	0.399	0.965
VCAM1	IRF1	4437090	4433930	9606.ENSP00000294728	9606.ENSP00000245414	0	0	0	0	0.066	0	0.9	0.663	0.965
EGF	TGFB1	4435570	4433189	9606.ENSP00000265171	9606.ENSP00000221930	0	0	0	0	0	0	0.9	0.67	0.965
ELANE	PRTN3	4450799	4433625	9606.ENSP00000466090	9606.ENSP00000234347	0	0	0.441	0.945	0.648	0	0.9	0.838	0.965
STAT3	IL1B	4435468	4435241	9606.ENSP00000264657	9606.ENSP00000263341	0	0	0	0	0	0	0.9	0.669	0.965
SRC	ESR2	4444215	4441379	9606.ENSP00000362680	9606.ENSP00000343925	0	0	0	0	0	0.407	0.9	0.459	0.965
MYC	BCL2	4451407	4446777	9606.ENSP00000479618	9606.ENSP00000381185	0	0	0	0	0	0.456	0.9	0.407	0.965
MAPK8	NR3C1	4446429	4433539	9606.ENSP00000378974	9606.ENSP00000231509	0	0	0	0	0.054	0.379	0.9	0.476	0.965
MTOR	EGF	4442490	4435570	9606.ENSP00000354558	9606.ENSP00000265171	0	0	0	0	0	0	0.9	0.668	0.965
IGF2	EGF	4447717	4435570	9606.ENSP00000391826	9606.ENSP00000265171	0	0	0	0	0	0	0.9	0.672	0.965
BIRC5	CCNA2	4437778	4436109	9606.ENSP00000301633	9606.ENSP00000274026	0	0	0	0	0.921	0.157	0	0.522	0.965
EGFR	MAPK1	4436186	4432880	9606.ENSP00000275493	9606.ENSP00000215832	0	0	0	0.577	0	0.472	0.9	0.887	0.965
PAX5	LEF1	4442079	4435569	9606.ENSP00000350844	9606.ENSP00000265165	0	0	0	0	0	0.263	0.9	0.552	0.964
IL4	IL2	4433533	4433376	9606.ENSP00000231449	9606.ENSP00000226730	0	0	0	0	0.062	0	0	0.963	0.964
STAT3	TGFB1	4435468	4433189	9606.ENSP00000264657	9606.ENSP00000221930	0	0	0	0	0	0.269	0.9	0.547	0.964
NOS1	ARG1	4451263	4441926	9606.ENSP00000477999	9606.ENSP00000349446	0	0	0	0	0.06	0.422	0.9	0.426	0.964
SDHD	CYCS	4444585	4438356	9606.ENSP00000364699	9606.ENSP00000307786	0	0	0	0	0.314	0	0.9	0.517	0.964
MYC	CCND1	4451407	4433391	9606.ENSP00000479618	9606.ENSP00000227507	0	0	0	0	0.069	0	0	0.963	0.964
ESR1	PGR	4448358	4439740	9606.ENSP00000405330	9606.ENSP00000325120	0	0	0	0.679	0.102	0.472	0.9	0.964	0.964
CYP2E1	PTGS2	4449959	4442894	9606.ENSP00000440689	9606.ENSP00000356438	0	0	0	0	0.055	0	0.9	0.658	0.964
F7	F10	4444589	4444587	9606.ENSP00000364731	9606.ENSP00000364709	0	0	0.423	0.897	0.404	0.379	0.9	0.786	0.964
PLG	EGF	4438461	4435570	9606.ENSP00000308938	9606.ENSP00000265171	0	0	0	0	0	0	0.9	0.661	0.964
EGFR	TP53	4436186	4435880	9606.ENSP00000275493	9606.ENSP00000269305	0	0	0	0	0	0.294	0	0.951	0.964
RAF1	MAPK1	4434195	4432880	9606.ENSP00000251849	9606.ENSP00000215832	0	0	0	0.587	0.064	0.447	0.9	0.888	0.964
PLCG2	EGFR	4451677	4436186	9606.ENSP00000482457	9606.ENSP00000275493	0	0	0	0	0.06	0.749	0.8	0.334	0.964
AKT1	SOD1	4450372	4435927	9606.ENSP00000451828	9606.ENSP00000270142	0	0	0	0	0	0.064	0.9	0.64	0.963
IL6	FGF23	4447254	4433694	9606.ENSP00000385675	9606.ENSP00000237837	0	0	0	0	0	0	0.9	0.651	0.963
FGF1	FGF23	4451524	4433694	9606.ENSP00000480791	9606.ENSP00000237837	0	0	0	0	0	0	0.9	0.648	0.963
AR	RB1	4444436	4435747	9606.ENSP00000363822	9606.ENSP00000267163	0	0	0	0	0	0.388	0.9	0.444	0.963
TP53	CCND1	4435880	4433391	9606.ENSP00000269305	9606.ENSP00000227507	0	0	0	0	0.061	0.379	0	0.942	0.963
IKBKB	CASP8	4449555	4442125	9606.ENSP00000430684	9606.ENSP00000351273	0	0	0	0	0.061	0.374	0.9	0.447	0.963
CYCS	CAT	4438356	4433793	9606.ENSP00000307786	9606.ENSP00000241052	0	0	0	0	0.155	0.41	0	0.933	0.963
TNFAIP3	IKBKB	4451592	4449555	9606.ENSP00000481570	9606.ENSP00000430684	0	0	0	0	0.059	0.406	0.9	0.431	0.963
SRC	EGFR	4444215	4436186	9606.ENSP00000362680	9606.ENSP00000275493	0	0	0	0.671	0	0.484	0.9	0.954	0.963
SPARC	TGFB1	4433520	4433189	9606.ENSP00000231061	9606.ENSP00000221930	0	0	0	0	0.062	0.407	0.9	0.423	0.963
MTOR	TERT	4442490	4438520	9606.ENSP00000354558	9606.ENSP00000309572	0	0	0	0	0	0.464	0.9	0.371	0.963
SRC	MAPK1	4444215	4432880	9606.ENSP00000362680	9606.ENSP00000215832	0	0	0.311	0.626	0.061	0.416	0.9	0.871	0.963
JUN	IL1B	4443699	4435241	9606.ENSP00000360266	9606.ENSP00000263341	0	0	0	0	0.052	0	0.8	0.82	0.963
RELA	NR3C1	4447098	4433539	9606.ENSP00000384273	9606.ENSP00000231509	0	0	0	0	0	0.393	0.9	0.443	0.963
GATA3	STAT3	4445191	4435468	9606.ENSP00000368632	9606.ENSP00000264657	0	0	0	0	0	0	0.9	0.646	0.963
SOD2	RELA	4450194	4447098	9606.ENSP00000446252	9606.ENSP00000384273	0	0	0	0	0	0	0.9	0.645	0.963
IL6	NFKB1	4447254	4433374	9606.ENSP00000385675	9606.ENSP00000226574	0	0	0	0	0.086	0	0.9	0.632	0.963
ESR1	MAPK14	4448358	4433482	9606.ENSP00000405330	9606.ENSP00000229795	0	0	0	0	0	0.399	0.9	0.421	0.962
BIRC5	STAT3	4437778	4435468	9606.ENSP00000301633	9606.ENSP00000264657	0	0	0	0	0	0.417	0.9	0.406	0.962
AKT1	NFKB1	4450372	4433374	9606.ENSP00000451828	9606.ENSP00000226574	0	0	0	0	0.065	0.261	0.9	0.525	0.962
IL4	MAPK14	4433533	4433482	9606.ENSP00000231449	9606.ENSP00000229795	0	0	0	0	0	0	0.9	0.641	0.962
RELA	PPARG	4447098	4436745	9606.ENSP00000384273	9606.ENSP00000287820	0	0	0	0	0	0.472	0.9	0.348	0.962
TH	TYR	4445511	4435237	9606.ENSP00000370571	9606.ENSP00000263321	0	0	0	0	0	0	0.9	0.645	0.962
ESR1	CYP19A1	4448358	4446543	9606.ENSP00000405330	9606.ENSP00000379683	0	0	0	0	0	0.085	0	0.96	0.962
IGF1	MAPK1	4437883	4432880	9606.ENSP00000302665	9606.ENSP00000215832	0	0	0	0	0	0	0.9	0.638	0.962
EGFR	WNT5A	4436186	4435460	9606.ENSP00000275493	9606.ENSP00000264634	0	0	0	0	0.14	0.195	0.9	0.525	0.962
CD40LG	STAT5A	4443586	4441128	9606.ENSP00000359663	9606.ENSP00000341208	0	0	0	0	0	0	0.9	0.638	0.962
ERBB2	ERBB3	4435897	4435741	9606.ENSP00000269571	9606.ENSP00000267101	0	0	0	0.897	0.115	0.561	0.9	0.969	0.962
CYP1A1	GSTM1	4445265	4438694	9606.ENSP00000369050	9606.ENSP00000311469	0	0	0	0	0.061	0.077	0.65	0.892	0.962
GATA3	FOXP3	4445191	4444690	9606.ENSP00000368632	9606.ENSP00000365380	0	0	0	0	0	0.454	0	0.933	0.962
STAT1	CSF2	4442456	4437349	9606.ENSP00000354394	9606.ENSP00000296871	0	0	0	0	0	0	0.9	0.638	0.962
ALAD	UROD	4447356	4433980	9606.ENSP00000386284	9606.ENSP00000246337	0.295	0	0.222	0	0.233	0.269	0	0.894	0.961
NR3C1	MAPK1	4433539	4432880	9606.ENSP00000231509	9606.ENSP00000215832	0	0	0	0	0	0.399	0.9	0.413	0.961
PRKCD	MAPK1	4446312	4432880	9606.ENSP00000378217	9606.ENSP00000215832	0	0	0	0.589	0.062	0.522	0.9	0.534	0.961
MMP9	MMP1	4443919	4439553	9606.ENSP00000361405	9606.ENSP00000322788	0	0	0	0.75	0.518	0	0.9	0.91	0.961
MAPK8	MAPT	4446429	4441081	9606.ENSP00000378974	9606.ENSP00000340820	0	0	0	0	0.064	0.294	0.9	0.479	0.961
STAT5B	STAT3	4437006	4435468	9606.ENSP00000293328	9606.ENSP00000264657	0	0	0	0.749	0.061	0.513	0.9	0.939	0.961
SRC	ERBB2	4444215	4435897	9606.ENSP00000362680	9606.ENSP00000269571	0	0	0	0.686	0.061	0.472	0.9	0.906	0.961
SPP1	FGF23	4446370	4433694	9606.ENSP00000378517	9606.ENSP00000237837	0	0	0	0	0	0	0.9	0.627	0.961
CTH	BHMT	4443637	4436127	9606.ENSP00000359976	9606.ENSP00000274353	0.184	0	0	0	0.08	0	0.8	0.771	0.961
CHUK	CASP8	4443527	4442125	9606.ENSP00000359424	9606.ENSP00000351273	0	0	0	0	0	0.374	0.9	0.43	0.961
JUN	RB1	4443699	4435747	9606.ENSP00000360266	9606.ENSP00000267163	0	0	0	0	0	0.379	0.9	0.417	0.96
PCCB	HLCS	4449005	4446889	9606.ENSP00000419027	9606.ENSP00000382071	0.219	0	0	0	0	0	0.9	0.53	0.96
THBD	F10	4444829	4444587	9606.ENSP00000366307	9606.ENSP00000364709	0	0	0	0	0	0.157	0.9	0.57	0.96
IKBKB	TLR4	4449555	4444300	9606.ENSP00000430684	9606.ENSP00000363089	0	0	0	0	0	0.123	0.9	0.584	0.96
PRKCD	FYN	4446312	4441647	9606.ENSP00000378217	9606.ENSP00000346671	0	0	0	0.573	0.062	0.54	0.9	0.388	0.96
MMP1	PLG	4439553	4438461	9606.ENSP00000322788	9606.ENSP00000308938	0	0	0	0	0.063	0	0.9	0.615	0.96
ARRB1	EGFR	4448521	4436186	9606.ENSP00000409581	9606.ENSP00000275493	0	0	0	0	0.057	0.393	0.9	0.389	0.96
TNF	ICAM1	4448041	4435501	9606.ENSP00000398698	9606.ENSP00000264832	0	0	0	0	0.119	0	0	0.957	0.96
AKT1	IGF1	4450372	4437883	9606.ENSP00000451828	9606.ENSP00000302665	0	0	0	0	0	0.262	0	0.948	0.96
EGF	FGF2	4435570	4435443	9606.ENSP00000265171	9606.ENSP00000264498	0	0	0	0	0	0.051	0	0.958	0.96
IGF1	MMP2	4437883	4433061	9606.ENSP00000302665	9606.ENSP00000219070	0	0	0	0	0.061	0	0.9	0.613	0.96
SRC	RASA1	4444215	4436131	9606.ENSP00000362680	9606.ENSP00000274376	0	0	0	0.552	0.063	0.435	0.9	0.726	0.96
TNFAIP3	CHUK	4451592	4443527	9606.ENSP00000481570	9606.ENSP00000359424	0	0	0	0	0	0.406	0.9	0.395	0.96
SRC	KDR	4444215	4435337	9606.ENSP00000362680	9606.ENSP00000263923	0	0	0	0.651	0.058	0.46	0.9	0.843	0.96
ESR1	CTSD	4448358	4433665	9606.ENSP00000405330	9606.ENSP00000236671	0	0	0	0	0.087	0	0.9	0.587	0.959
RELA	IFNG	4447098	4433446	9606.ENSP00000384273	9606.ENSP00000229135	0	0	0	0	0	0	0.9	0.614	0.959
COL1A1	PLOD1	4433346	4432760	9606.ENSP00000225964	9606.ENSP00000196061	0	0	0	0	0.129	0.237	0.9	0.462	0.959
MTOR	IL2	4442490	4433376	9606.ENSP00000354558	9606.ENSP00000226730	0	0	0	0	0	0	0.9	0.615	0.959
PRKCA	EGFR	4448494	4436186	9606.ENSP00000408695	9606.ENSP00000275493	0	0	0	0.557	0.049	0.44	0.9	0.676	0.959
ALOX15	PTGS2	4450608	4442894	9606.ENSP00000458832	9606.ENSP00000356438	0	0	0	0	0.061	0	0.9	0.601	0.959
IL6	IL2	4447254	4433376	9606.ENSP00000385675	9606.ENSP00000226730	0	0	0	0	0	0	0	0.958	0.959
VEGFA	IL6	4451310	4447254	9606.ENSP00000478570	9606.ENSP00000385675	0	0	0	0	0.063	0	0	0.957	0.959
PRKCE	MAPK1	4438196	4432880	9606.ENSP00000306124	9606.ENSP00000215832	0	0	0	0.595	0.062	0.522	0.9	0.421	0.959
MAP2K4	MAPK14	4448551	4433482	9606.ENSP00000410402	9606.ENSP00000229795	0	0	0.295	0.606	0.062	0.379	0.9	0.753	0.959
IL6	TLR4	4447254	4444300	9606.ENSP00000385675	9606.ENSP00000363089	0	0	0	0	0.082	0	0	0.956	0.959
IL6	CSF2	4447254	4437349	9606.ENSP00000385675	9606.ENSP00000296871	0	0	0	0	0.172	0	0	0.952	0.959
RASA1	EGF	4436131	4435570	9606.ENSP00000274376	9606.ENSP00000265171	0	0	0	0	0	0	0.9	0.614	0.959
SRC	FAS	4444215	4441783	9606.ENSP00000362680	9606.ENSP00000347979	0	0	0	0	0	0.379	0.9	0.397	0.959
ALDH2	CAT	4434937	4433793	9606.ENSP00000261733	9606.ENSP00000241052	0	0	0	0	0.124	0.05	0.9	0.574	0.959
HIF1A	CDKN2A	4449842	4448997	9606.ENSP00000437955	9606.ENSP00000418915	0	0	0	0	0	0.379	0.9	0.402	0.959
MMP9	MMP3	4443919	4437610	9606.ENSP00000361405	9606.ENSP00000299855	0	0	0	0.791	0.518	0	0.9	0.911	0.959
PCNA	CCND1	4445167	4433391	9606.ENSP00000368458	9606.ENSP00000227507	0	0	0	0	0.063	0.379	0.9	0.388	0.959
IGFBP3	MMP1	4445494	4439553	9606.ENSP00000370473	9606.ENSP00000322788	0	0	0	0	0.142	0.379	0.9	0.327	0.959
BTK	FYN	4451790	4441647	9606.ENSP00000483570	9606.ENSP00000346671	0	0	0	0.848	0.063	0.556	0.9	0.654	0.959
SRC	F2	4444215	4438421	9606.ENSP00000362680	9606.ENSP00000308541	0	0	0	0	0	0.05	0.9	0.608	0.959
TERT	IL2	4438520	4433376	9606.ENSP00000309572	9606.ENSP00000226730	0	0	0	0	0	0	0.9	0.599	0.958
BAK1	CYCS	4444397	4438356	9606.ENSP00000363591	9606.ENSP00000307786	0	0	0	0	0.089	0	0.9	0.585	0.958
IL10	FOXP3	4448642	4444690	9606.ENSP00000412237	9606.ENSP00000365380	0	0	0	0	0	0	0	0.957	0.958
TLR4	CASP8	4444300	4442125	9606.ENSP00000363089	9606.ENSP00000351273	0	0	0	0	0.062	0.08	0.9	0.577	0.958
EDN1	ADRB2	4445200	4438121	9606.ENSP00000368683	9606.ENSP00000305372	0	0	0	0	0	0.157	0.9	0.546	0.958
DNMT1	TP53	4442259	4435880	9606.ENSP00000352516	9606.ENSP00000269305	0	0	0	0	0.072	0.379	0	0.933	0.958
NOS2	CAT	4439909	4433793	9606.ENSP00000327251	9606.ENSP00000241052	0	0	0	0	0	0	0.9	0.603	0.958
RXRA	PPARA	4449061	4447242	9606.ENSP00000419692	9606.ENSP00000385523	0	0	0	0.695	0.062	0.478	0.9	0.715	0.958
PTGS1	ALOX12	4442503	4434179	9606.ENSP00000354612	9606.ENSP00000251535	0	0	0	0	0.107	0	0.9	0.57	0.958
NEDD4	ERBB4	4449308	4441238	9606.ENSP00000424827	9606.ENSP00000342235	0	0	0	0	0	0.401	0.9	0.358	0.958
PPARG	NFKB1	4436745	4433374	9606.ENSP00000287820	9606.ENSP00000226574	0	0	0	0	0.049	0.379	0.9	0.378	0.958
PTGS2	CXCL8	4442894	4438229	9606.ENSP00000356438	9606.ENSP00000306512	0	0	0	0	0.753	0	0	0.839	0.958
PRKCD	SRC	4446312	4444215	9606.ENSP00000378217	9606.ENSP00000362680	0	0	0	0.566	0.09	0.406	0.9	0.699	0.958
PCNA	PARP1	4445167	4442743	9606.ENSP00000368458	9606.ENSP00000355759	0	0	0	0	0.34	0.379	0.9	0.106	0.958
ALOX15	PTGS1	4450608	4442503	9606.ENSP00000458832	9606.ENSP00000354612	0	0	0	0	0.061	0	0.9	0.594	0.958
CXCL8	NFKB1	4438229	4433374	9606.ENSP00000306512	9606.ENSP00000226574	0	0	0	0	0.118	0	0.9	0.57	0.958
SRC	RAF1	4444215	4434195	9606.ENSP00000362680	9606.ENSP00000251849	0	0	0	0.665	0	0.456	0.9	0.818	0.958
PDGFB	EGF	4440178	4435570	9606.ENSP00000330382	9606.ENSP00000265171	0	0	0	0	0.061	0	0.9	0.58	0.957
BIRC5	TP53	4437778	4435880	9606.ENSP00000301633	9606.ENSP00000269305	0	0	0	0	0.088	0	0.9	0.571	0.957
IGF2	PLG	4447717	4438461	9606.ENSP00000391826	9606.ENSP00000308938	0	0	0	0	0.061	0.379	0.9	0.361	0.957
TNF	IL2	4448041	4433376	9606.ENSP00000398698	9606.ENSP00000226730	0	0	0	0	0	0	0	0.956	0.957
PGR	MAPK1	4439740	4432880	9606.ENSP00000325120	9606.ENSP00000215832	0	0	0	0	0	0.399	0.9	0.354	0.957
ARG1	NOS3	4441926	4437409	9606.ENSP00000349446	9606.ENSP00000297494	0	0	0	0	0.06	0.108	0.9	0.551	0.957
GATA3	PGR	4445191	4439740	9606.ENSP00000368632	9606.ENSP00000325120	0	0	0	0	0.054	0.064	0.9	0.576	0.957
IL10	IL2	4448642	4433376	9606.ENSP00000412237	9606.ENSP00000226730	0	0	0	0	0	0	0	0.956	0.957
MYC	PML	4451407	4435801	9606.ENSP00000479618	9606.ENSP00000268058	0	0	0	0	0.057	0.403	0.9	0.329	0.957
CX3CR1	CXCL10	4442101	4438146	9606.ENSP00000351059	9606.ENSP00000305651	0	0	0	0	0	0	0.9	0.587	0.957
F2	PLAT	4438421	4433132	9606.ENSP00000308541	9606.ENSP00000220809	0	0	0.395	0.642	0	0.379	0.9	0.706	0.957
NR3C1	NFKB1	4433539	4433374	9606.ENSP00000231509	9606.ENSP00000226574	0	0	0	0	0.064	0.379	0.9	0.348	0.957
AKT1	HSPB1	4450372	4434059	9606.ENSP00000451828	9606.ENSP00000248553	0	0	0	0	0	0.698	0	0.864	0.957
ESR1	HSPB1	4448358	4434059	9606.ENSP00000405330	9606.ENSP00000248553	0	0	0	0	0	0.336	0.9	0.414	0.957
TNF	TLR4	4448041	4444300	9606.ENSP00000398698	9606.ENSP00000363089	0	0	0	0	0.082	0	0	0.955	0.957
RUNX2	RB1	4443746	4435747	9606.ENSP00000360493	9606.ENSP00000267163	0	0	0	0	0	0.458	0.9	0.268	0.956
TNF	CSF2	4448041	4437349	9606.ENSP00000398698	9606.ENSP00000296871	0	0	0	0	0.131	0	0	0.951	0.956
VEGFA	ERBB2	4451310	4435897	9606.ENSP00000478570	9606.ENSP00000269571	0	0	0	0	0	0	0.6	0.895	0.956
PLCG2	ERBB2	4451677	4435897	9606.ENSP00000482457	9606.ENSP00000269571	0	0	0	0	0.06	0.732	0.8	0.23	0.956
PRKCA	SRC	4448494	4444215	9606.ENSP00000408695	9606.ENSP00000362680	0	0	0	0.575	0	0.399	0.9	0.738	0.956
STAT4	MAPK14	4446006	4433482	9606.ENSP00000376134	9606.ENSP00000229795	0	0	0	0	0.06	0.384	0.9	0.341	0.956
EDN1	EGF	4445200	4435570	9606.ENSP00000368683	9606.ENSP00000265171	0	0	0	0	0	0	0.9	0.586	0.956
JUN	PPARG	4443699	4436745	9606.ENSP00000360266	9606.ENSP00000287820	0	0	0	0	0	0.144	0.9	0.533	0.956
TLR4	S100A9	4444300	4443166	9606.ENSP00000363089	9606.ENSP00000357727	0	0	0	0	0.185	0	0.9	0.508	0.956
OAT	OTC	4443204	4432619	9606.ENSP00000357838	9606.ENSP00000039007	0.295	0.59	0	0	0.276	0	0	0.815	0.956
JUN	NOS2	4443699	4439909	9606.ENSP00000360266	9606.ENSP00000327251	0	0	0	0	0	0	0.9	0.584	0.956
AVP	CALCA	4445364	4440295	9606.ENSP00000369647	9606.ENSP00000331746	0	0	0	0	0.062	0	0.9	0.573	0.956
PLG	IGF1	4438461	4437883	9606.ENSP00000308938	9606.ENSP00000302665	0	0	0	0	0.109	0	0.9	0.547	0.956
PRKCD	STAT3	4446312	4435468	9606.ENSP00000378217	9606.ENSP00000264657	0	0	0	0	0.061	0.394	0.9	0.321	0.956
AKT1	RB1	4450372	4435747	9606.ENSP00000451828	9606.ENSP00000267163	0	0	0	0	0	0.08	0.9	0.558	0.955
EDN1	JUN	4445200	4443699	9606.ENSP00000368683	9606.ENSP00000360266	0	0	0	0	0.073	0	0.9	0.554	0.955
MTOR	PML	4442490	4435801	9606.ENSP00000354558	9606.ENSP00000268058	0	0	0	0	0	0.472	0.9	0.228	0.955
SRC	RET	4444215	4441779	9606.ENSP00000362680	9606.ENSP00000347942	0	0	0	0.706	0.061	0.472	0.9	0.603	0.955
TNF	NR3C1	4448041	4433539	9606.ENSP00000398698	9606.ENSP00000231509	0	0	0	0	0	0	0.9	0.577	0.955
RXRA	PPARD	4449061	4438644	9606.ENSP00000419692	9606.ENSP00000310928	0	0	0	0.705	0.062	0.467	0.9	0.604	0.955
NR1H4	ABCB11	4450225	4435322	9606.ENSP00000447149	9606.ENSP00000263817	0	0	0	0	0.106	0.336	0	0.931	0.955
GATA3	TCF3	4445191	4435174	9606.ENSP00000368632	9606.ENSP00000262965	0	0	0	0	0.061	0	0.9	0.563	0.955
PLG	TGFB1	4438461	4433189	9606.ENSP00000308938	9606.ENSP00000221930	0	0	0	0	0	0	0.9	0.576	0.955
NOS2	STAT3	4439909	4435468	9606.ENSP00000327251	9606.ENSP00000264657	0	0	0	0	0	0	0.9	0.575	0.955
VDR	RXRA	4450226	4449061	9606.ENSP00000447173	9606.ENSP00000419692	0	0	0	0.635	0	0.438	0.9	0.677	0.955
TERT	MAPK1	4438520	4432880	9606.ENSP00000309572	9606.ENSP00000215832	0	0	0	0	0.056	0	0.9	0.569	0.955
PLCG2	PRKCA	4451677	4448494	9606.ENSP00000482457	9606.ENSP00000408695	0	0	0	0	0.062	0.405	0.9	0.295	0.955
CAV1	TGFB1	4440933	4433189	9606.ENSP00000339191	9606.ENSP00000221930	0	0	0	0	0	0	0.9	0.559	0.954
JUN	IL4	4443699	4433533	9606.ENSP00000360266	9606.ENSP00000231449	0	0	0	0	0	0	0.9	0.559	0.954
COL3A1	PLOD1	4438049	4432760	9606.ENSP00000304408	9606.ENSP00000196061	0	0	0	0	0.095	0.17	0.9	0.463	0.954
JUN	IRF1	4443699	4433930	9606.ENSP00000360266	9606.ENSP00000245414	0	0	0	0	0.062	0	0.9	0.554	0.954
RB1	MAPK1	4435747	4432880	9606.ENSP00000267163	9606.ENSP00000215832	0	0	0	0	0.061	0.379	0.9	0.317	0.954
IL2	MAPK1	4433376	4432880	9606.ENSP00000226730	9606.ENSP00000215832	0	0	0	0	0	0	0.9	0.559	0.954
EZR	CASP8	4442801	4442125	9606.ENSP00000356042	9606.ENSP00000351273	0	0	0	0	0.056	0.48	0.9	0.186	0.954
PLG	SPARC	4438461	4433520	9606.ENSP00000308938	9606.ENSP00000231061	0	0	0	0	0	0.379	0.9	0.32	0.954
PGR	ERBB2	4439740	4435897	9606.ENSP00000325120	9606.ENSP00000269571	0	0	0	0	0	0.36	0	0.931	0.954
STAT1	FADD	4442456	4437802	9606.ENSP00000354394	9606.ENSP00000301838	0	0	0	0	0	0.305	0.9	0.398	0.954
RELA	IL1B	4447098	4435241	9606.ENSP00000384273	9606.ENSP00000263341	0	0	0	0	0	0	0.9	0.559	0.954
FYN	EGF	4441647	4435570	9606.ENSP00000346671	9606.ENSP00000265171	0	0	0	0	0	0.05	0.9	0.564	0.954
JUN	CSNK2A1	4443699	4433007	9606.ENSP00000360266	9606.ENSP00000217244	0	0	0	0	0	0.379	0.9	0.33	0.954
SELE	ICAM1	4440292	4435501	9606.ENSP00000331736	9606.ENSP00000264832	0	0	0	0	0.058	0	0	0.953	0.954
SRC	MET	4444215	4439114	9606.ENSP00000362680	9606.ENSP00000317272	0	0	0	0.684	0.063	0.407	0.9	0.795	0.954
PRKCD	STAT1	4446312	4442456	9606.ENSP00000378217	9606.ENSP00000354394	0	0	0	0	0.061	0.394	0.9	0.298	0.954
MAPK8	SRC	4446429	4444215	9606.ENSP00000378974	9606.ENSP00000362680	0	0	0.376	0.573	0.063	0.166	0.9	0.866	0.954
VEGFA	CXCL8	4451310	4438229	9606.ENSP00000478570	9606.ENSP00000306512	0	0	0	0	0.065	0	0	0.953	0.954
MMP3	EGFR	4437610	4436186	9606.ENSP00000299855	9606.ENSP00000275493	0	0	0	0	0.076	0	0.9	0.543	0.954
NFKB1	MAPK1	4433374	4432880	9606.ENSP00000226574	9606.ENSP00000215832	0	0	0	0	0.042	0.185	0.9	0.481	0.954
DNMT1	E2F1	4442259	4441534	9606.ENSP00000352516	9606.ENSP00000345571	0	0	0	0	0.127	0.294	0.9	0.329	0.953
IL6	ICAM1	4447254	4435501	9606.ENSP00000385675	9606.ENSP00000264832	0	0	0	0	0.152	0	0	0.947	0.953
FYN	IL2	4441647	4433376	9606.ENSP00000346671	9606.ENSP00000226730	0	0	0	0	0	0	0.9	0.556	0.953
STAT1	EGF	4442456	4435570	9606.ENSP00000354394	9606.ENSP00000265171	0	0	0	0	0	0	0.9	0.558	0.953
MMP1	MMP3	4439553	4437610	9606.ENSP00000322788	9606.ENSP00000299855	0	0	0.298	0.953	0.529	0	0.9	0.921	0.953
ESR2	FOS	4441379	4438204	9606.ENSP00000343925	9606.ENSP00000306245	0	0	0	0	0	0.299	0.8	0.695	0.953
MAPK8	EDN1	4446429	4445200	9606.ENSP00000378974	9606.ENSP00000368683	0	0	0	0	0	0	0.9	0.551	0.953
AKT1	E2F1	4450372	4441534	9606.ENSP00000451828	9606.ENSP00000345571	0	0	0	0	0.091	0.124	0.9	0.481	0.953
FYN	ERBB2	4441647	4435897	9606.ENSP00000346671	9606.ENSP00000269571	0	0	0	0.695	0	0.472	0.9	0.525	0.953
RELA	CASP8	4447098	4442125	9606.ENSP00000384273	9606.ENSP00000351273	0	0	0	0	0.061	0	0.9	0.542	0.953
PRKCD	CASP3	4446312	4438651	9606.ENSP00000378217	9606.ENSP00000311032	0	0	0	0	0	0	0.9	0.556	0.953
EZR	FADD	4442801	4437802	9606.ENSP00000356042	9606.ENSP00000301838	0	0	0	0	0	0.518	0.9	0.121	0.953
IGF1	RAF1	4437883	4434195	9606.ENSP00000302665	9606.ENSP00000251849	0	0	0	0	0	0.262	0.9	0.422	0.953
ADORA3	ADRA2A	4443373	4436361	9606.ENSP00000358730	9606.ENSP00000280155	0	0	0	0	0	0	0.9	0.555	0.953
VEGFA	TGFB2	4451310	4442765	9606.ENSP00000478570	9606.ENSP00000355896	0	0	0	0	0	0	0.9	0.556	0.953
FGFR2	SRC	4448546	4444215	9606.ENSP00000410294	9606.ENSP00000362680	0	0	0	0.706	0.062	0.465	0.9	0.533	0.953
IL6	IGFBP3	4447254	4445494	9606.ENSP00000385675	9606.ENSP00000370473	0	0	0	0	0.076	0	0.9	0.536	0.953
AKT1	PDGFB	4450372	4440178	9606.ENSP00000451828	9606.ENSP00000330382	0	0	0	0	0	0	0.9	0.558	0.953
E2F1	TYMS	4441534	4439011	9606.ENSP00000345571	9606.ENSP00000315644	0	0	0	0	0.233	0	0.9	0.446	0.953
ASS1	NOS3	4443929	4437409	9606.ENSP00000361471	9606.ENSP00000297494	0	0	0	0	0.051	0	0.9	0.541	0.952
BCL2	MAPK8	4446777	4446429	9606.ENSP00000381185	9606.ENSP00000378974	0	0	0	0	0	0.386	0.9	0.29	0.952
CYP1A2	CYP3A4	4441211	4440831	9606.ENSP00000342007	9606.ENSP00000337915	0	0	0.442	0.604	0.139	0	0.9	0.935	0.952
SRC	PRKCE	4444215	4438196	9606.ENSP00000362680	9606.ENSP00000306124	0	0	0	0.565	0.062	0.472	0.9	0.292	0.952
BTK	FAS	4451790	4441783	9606.ENSP00000483570	9606.ENSP00000347979	0	0	0	0	0	0.379	0.9	0.299	0.952
STAT5A	FOS	4441128	4438204	9606.ENSP00000341208	9606.ENSP00000306245	0	0	0	0	0.061	0.055	0.9	0.527	0.952
TGFB2	EGF	4442765	4435570	9606.ENSP00000355896	9606.ENSP00000265171	0	0	0	0	0.061	0	0.9	0.534	0.952
PLCG2	FYN	4451677	4441647	9606.ENSP00000482457	9606.ENSP00000346671	0	0	0	0.554	0.061	0.401	0.9	0.502	0.952
DHFR	E2F1	4447922	4441534	9606.ENSP00000396308	9606.ENSP00000345571	0	0	0	0	0.156	0	0.9	0.477	0.952
FYN	KDR	4441647	4435337	9606.ENSP00000346671	9606.ENSP00000263923	0	0	0	0.645	0.058	0.46	0.9	0.426	0.952
BAK1	BAX	4444397	4437004	9606.ENSP00000363591	9606.ENSP00000293288	0	0	0	0.654	0.088	0.379	0.9	0.674	0.952
PLAU	F2	4444017	4438421	9606.ENSP00000361850	9606.ENSP00000308541	0	0	0.415	0.645	0	0.379	0.9	0.434	0.952
RB1	RAF1	4435747	4434195	9606.ENSP00000267163	9606.ENSP00000251849	0	0	0	0	0	0.404	0.9	0.26	0.952
KDR	FLT4	4435337	4434983	9606.ENSP00000263923	9606.ENSP00000261937	0	0	0	0.909	0.093	0.472	0.9	0.954	0.952
ICAM1	IRF1	4435501	4433930	9606.ENSP00000264832	9606.ENSP00000245414	0	0	0	0	0.156	0	0.9	0.477	0.952
JUN	NOS3	4443699	4437409	9606.ENSP00000360266	9606.ENSP00000297494	0	0	0	0	0	0	0.9	0.542	0.952
NQO1	HMOX1	4439310	4432912	9606.ENSP00000319788	9606.ENSP00000216117	0	0	0	0	0.056	0	0	0.951	0.952
RELA	MAPK1	4447098	4432880	9606.ENSP00000384273	9606.ENSP00000215832	0	0	0	0	0	0	0.9	0.541	0.952
RELA	MAPK8	4447098	4446429	9606.ENSP00000384273	9606.ENSP00000378974	0	0	0	0	0	0	0.8	0.769	0.952
PARP1	CASP9	4442743	4440164	9606.ENSP00000355759	9606.ENSP00000330237	0	0	0	0	0.061	0.126	0.8	0.743	0.952
PRKCD	NOS3	4446312	4437409	9606.ENSP00000378217	9606.ENSP00000297494	0	0	0	0	0	0.08	0.9	0.528	0.952
CSF2	MAPK1	4437349	4432880	9606.ENSP00000296871	9606.ENSP00000215832	0	0	0	0	0	0	0.9	0.542	0.952
CYP2E1	ALDH3A1	4449959	4448623	9606.ENSP00000440689	9606.ENSP00000411821	0	0	0	0	0	0.085	0.9	0.511	0.951
CYP2D6	MAOA	4442402	4441072	9606.ENSP00000353820	9606.ENSP00000340684	0	0	0	0	0.063	0	0.9	0.522	0.951
PTPN1	EGF	4443784	4435570	9606.ENSP00000360683	9606.ENSP00000265171	0	0	0	0	0	0	0.9	0.532	0.951
PLCG2	CD14	4451677	4438033	9606.ENSP00000482457	9606.ENSP00000304236	0	0	0	0	0.098	0	0.9	0.501	0.951
PTEN	MTOR	4443848	4442490	9606.ENSP00000361021	9606.ENSP00000354558	0	0	0	0	0	0.314	0	0.932	0.951
CX3CR1	CXCL8	4442101	4438229	9606.ENSP00000351059	9606.ENSP00000306512	0	0	0	0	0	0	0.9	0.538	0.951
TNF	PPARA	4448041	4447242	9606.ENSP00000398698	9606.ENSP00000385523	0	0	0	0	0	0	0.9	0.538	0.951
TGFB2	IGF1	4442765	4437883	9606.ENSP00000355896	9606.ENSP00000302665	0	0	0	0	0	0	0.9	0.539	0.951
PLAU	EGFR	4444017	4436186	9606.ENSP00000361850	9606.ENSP00000275493	0	0	0	0	0.088	0	0.9	0.513	0.951
MAPK8	ERBB3	4446429	4435741	9606.ENSP00000378974	9606.ENSP00000267101	0	0	0	0	0	0	0.9	0.538	0.951
PPARA	MAPK1	4447242	4432880	9606.ENSP00000385523	9606.ENSP00000215832	0	0	0	0	0	0.399	0.9	0.264	0.951
RELA	NOS2	4447098	4439909	9606.ENSP00000384273	9606.ENSP00000327251	0	0	0	0	0	0.343	0.9	0.327	0.951
DHFR	AKR1B1	4447922	4436650	9606.ENSP00000396308	9606.ENSP00000285930	0	0	0	0	0	0	0.9	0.534	0.951
NOS1	GRIN2A	4451263	4446563	9606.ENSP00000477999	9606.ENSP00000379818	0	0	0	0	0.062	0.31	0.8	0.666	0.951
PLG	PLAT	4438461	4433132	9606.ENSP00000308938	9606.ENSP00000220809	0	0	0	0.756	0.056	0.379	0.9	0.953	0.951
PLAU	PLG	4444017	4438461	9606.ENSP00000361850	9606.ENSP00000308938	0	0	0	0.745	0	0.379	0.9	0.961	0.951
STAT1	CXCL10	4442456	4438146	9606.ENSP00000354394	9606.ENSP00000305651	0	0	0	0	0.707	0	0	0.84	0.951
CXCL2	STAT3	4449392	4435468	9606.ENSP00000427279	9606.ENSP00000264657	0	0	0	0	0.063	0	0.9	0.525	0.951
PTGS2	ALOX12	4442894	4434179	9606.ENSP00000356438	9606.ENSP00000251535	0	0	0	0	0.061	0	0.9	0.526	0.951
MAPK8	BAX	4446429	4437004	9606.ENSP00000378974	9606.ENSP00000293288	0	0	0	0	0	0.053	0.9	0.525	0.951
OPRM1	ADORA3	4447859	4443373	9606.ENSP00000394624	9606.ENSP00000358730	0	0	0	0	0	0	0.9	0.526	0.95
LYZ	MPO	4434847	4433305	9606.ENSP00000261267	9606.ENSP00000225275	0	0	0	0	0.138	0	0.9	0.472	0.95
PDGFB	SPARC	4440178	4433520	9606.ENSP00000330382	9606.ENSP00000231061	0	0	0	0	0.062	0.379	0.9	0.25	0.95
SLC2A1	TP53	4448824	4435880	9606.ENSP00000416293	9606.ENSP00000269305	0	0	0	0	0	0	0.8	0.763	0.95
TOP2A	BIRC5	4448614	4437778	9606.ENSP00000411532	9606.ENSP00000301633	0	0	0	0	0.883	0	0	0.589	0.95
GATA3	JUN	4445191	4443699	9606.ENSP00000368632	9606.ENSP00000360266	0	0	0	0	0	0.094	0.9	0.493	0.95
ADAM17	ERBB2	4438549	4435897	9606.ENSP00000309968	9606.ENSP00000269571	0	0	0	0	0.049	0	0.9	0.523	0.95
STAT5A	IFNG	4441128	4433446	9606.ENSP00000341208	9606.ENSP00000229135	0	0	0	0	0.053	0	0.9	0.514	0.95
TNFAIP3	FADD	4451592	4437802	9606.ENSP00000481570	9606.ENSP00000301838	0	0	0	0	0	0.379	0.9	0.261	0.95
HTR2A	OXT	4449830	4433016	9606.ENSP00000437737	9606.ENSP00000217386	0	0	0	0	0.061	0	0.9	0.517	0.95
FOS	STAT5B	4438204	4437006	9606.ENSP00000306245	9606.ENSP00000293328	0	0	0	0	0.061	0.055	0.9	0.511	0.95
PDGFB	TGFB1	4440178	4433189	9606.ENSP00000330382	9606.ENSP00000221930	0	0	0	0	0	0	0.9	0.529	0.95
IL10	TLR4	4448642	4444300	9606.ENSP00000412237	9606.ENSP00000363089	0	0	0	0	0	0.299	0	0.931	0.95
IL6	FOXP3	4447254	4444690	9606.ENSP00000385675	9606.ENSP00000365380	0	0	0	0	0	0.269	0	0.934	0.95
EDN1	MMP9	4445200	4443919	9606.ENSP00000368683	9606.ENSP00000361405	0	0	0	0	0	0	0.8	0.763	0.95
PTPN1	CAV1	4443784	4440933	9606.ENSP00000360683	9606.ENSP00000339191	0	0	0	0	0	0.379	0.9	0.268	0.95
CYP1A1	CYP3A4	4445265	4440831	9606.ENSP00000369050	9606.ENSP00000337915	0	0	0.443	0.605	0.129	0	0.9	0.895	0.95
PDGFB	IGF1	4440178	4437883	9606.ENSP00000330382	9606.ENSP00000302665	0	0	0	0	0	0	0.9	0.529	0.95
IL1B	CCL2	4435241	4433339	9606.ENSP00000263341	9606.ENSP00000225831	0	0	0	0	0.126	0	0	0.945	0.95
EDN1	F2	4445200	4438421	9606.ENSP00000368683	9606.ENSP00000308541	0	0	0	0	0	0	0.9	0.52	0.95
CASP8	NFKB1	4442125	4433374	9606.ENSP00000351273	9606.ENSP00000226574	0	0	0	0	0.062	0.178	0.9	0.437	0.95
FYN	RAF1	4441647	4434195	9606.ENSP00000346671	9606.ENSP00000251849	0	0	0	0.666	0	0.456	0.9	0.41	0.95
SPP1	APOE	4446370	4434227	9606.ENSP00000378517	9606.ENSP00000252486	0	0	0	0	0.153	0	0.9	0.446	0.949
VCAM1	STAT3	4437090	4435468	9606.ENSP00000294728	9606.ENSP00000264657	0	0	0	0	0.061	0	0.9	0.506	0.949
COL1A1	PLOD3	4433346	4433268	9606.ENSP00000225964	9606.ENSP00000223127	0	0	0	0	0.095	0.17	0.9	0.408	0.949
STAT5A	STAT5B	4441128	4437006	9606.ENSP00000341208	9606.ENSP00000293328	0	0	0	0.985	0.112	0.472	0.9	0.883	0.949
TLR4	FADD	4444300	4437802	9606.ENSP00000363089	9606.ENSP00000301838	0	0	0	0	0	0.05	0.9	0.511	0.949
ADORA3	OPRK1	4443373	4435619	9606.ENSP00000358730	9606.ENSP00000265572	0	0	0	0	0	0	0.9	0.515	0.949
MYC	MAPK14	4451407	4433482	9606.ENSP00000479618	9606.ENSP00000229795	0	0	0	0	0	0.139	0.9	0.46	0.949
JUN	IFNG	4443699	4433446	9606.ENSP00000360266	9606.ENSP00000229135	0	0	0	0	0	0	0.9	0.518	0.949
STAT2	STAT3	4439022	4435468	9606.ENSP00000315768	9606.ENSP00000264657	0	0	0	0.867	0.063	0.441	0.9	0.848	0.949
JUN	TGFB1	4443699	4433189	9606.ENSP00000360266	9606.ENSP00000221930	0	0	0	0	0.061	0	0.9	0.51	0.949
TLR4	CHUK	4444300	4443527	9606.ENSP00000363089	9606.ENSP00000359424	0	0	0	0	0	0.123	0.9	0.471	0.949
EDN1	EGFR	4445200	4436186	9606.ENSP00000368683	9606.ENSP00000275493	0	0	0	0	0.098	0	0.9	0.482	0.949
MAPK14	NFKB1	4433482	4433374	9606.ENSP00000229795	9606.ENSP00000226574	0	0	0	0	0.065	0.185	0.9	0.409	0.948
RELA	MAPK14	4447098	4433482	9606.ENSP00000384273	9606.ENSP00000229795	0	0	0	0	0	0.106	0.9	0.465	0.948
PCNA	TP53	4445167	4435880	9606.ENSP00000368458	9606.ENSP00000269305	0	0	0	0	0.069	0.379	0.9	0.22	0.948
IVD	HADHA	4448961	4445432	9606.ENSP00000418397	9606.ENSP00000370023	0.048	0	0	0	0.126	0.085	0.9	0.432	0.948
PPARG	TGFB1	4436745	4433189	9606.ENSP00000287820	9606.ENSP00000221930	0	0	0	0	0	0	0.9	0.51	0.948
IGF2	INS	4447717	4446661	9606.ENSP00000391826	9606.ENSP00000380432	0	0	0	0	0	0	0	0.947	0.948
CYP2D6	CYP3A4	4442402	4440831	9606.ENSP00000353820	9606.ENSP00000337915	0	0	0.421	0.617	0.089	0	0.9	0.935	0.948
GAD1	GLUL	4442087	4438369	9606.ENSP00000350928	9606.ENSP00000307900	0.068	0	0	0	0.061	0	0.9	0.481	0.948
ADRB1	CALCA	4443292	4440295	9606.ENSP00000358301	9606.ENSP00000331746	0	0	0	0	0	0	0.9	0.51	0.948
ESR1	TP53	4448358	4435880	9606.ENSP00000405330	9606.ENSP00000269305	0	0	0	0	0	0.379	0	0.919	0.948
FGF23	CYP27B1	4433694	4433420	9606.ENSP00000237837	9606.ENSP00000228606	0	0	0	0	0	0	0	0.948	0.948
MAPK8	CD40LG	4446429	4443586	9606.ENSP00000378974	9606.ENSP00000359663	0	0	0	0	0	0.076	0.9	0.473	0.947
SRC	PDGFB	4444215	4440178	9606.ENSP00000362680	9606.ENSP00000330382	0	0	0	0	0.076	0	0.9	0.473	0.947
IL6	INS	4447254	4446661	9606.ENSP00000385675	9606.ENSP00000380432	0	0	0	0	0	0	0	0.947	0.947
HLCS	MCCC2	4446889	4441355	9606.ENSP00000382071	9606.ENSP00000343657	0.219	0	0	0	0	0	0.9	0.379	0.947
IL1A	NFKB1	4435240	4433374	9606.ENSP00000263339	9606.ENSP00000226574	0	0	0	0	0.091	0	0.9	0.471	0.947
MAPK8	MAPK1	4446429	4432880	9606.ENSP00000378974	9606.ENSP00000215832	0	0	0.386	0.886	0.081	0.384	0.9	0.98	0.947
AKT1	CD40LG	4450372	4443586	9606.ENSP00000451828	9606.ENSP00000359663	0	0	0	0	0	0.072	0.9	0.482	0.947
PRKCA	RAF1	4448494	4434195	9606.ENSP00000408695	9606.ENSP00000251849	0	0	0	0.58	0	0.399	0.9	0.421	0.947
EDN1	OXT	4445200	4433016	9606.ENSP00000368683	9606.ENSP00000217386	0	0	0	0	0	0	0.9	0.496	0.947
PRKCA	MTOR	4448494	4442490	9606.ENSP00000408695	9606.ENSP00000354558	0	0	0	0	0	0.234	0.9	0.372	0.947
PPARA	RELA	4447242	4447098	9606.ENSP00000385523	9606.ENSP00000384273	0	0	0	0	0	0.393	0.9	0.21	0.947
CALCA	ADRB2	4440295	4438121	9606.ENSP00000331746	9606.ENSP00000305372	0	0	0	0	0	0	0.9	0.499	0.947
ESR1	ERBB2	4448358	4435897	9606.ENSP00000405330	9606.ENSP00000269571	0	0	0	0	0	0.32	0	0.926	0.947
SRC	VCAM1	4444215	4437090	9606.ENSP00000362680	9606.ENSP00000294728	0	0	0	0	0.055	0	0.9	0.484	0.947
HADHA	ACADSB	4445432	4443211	9606.ENSP00000370023	9606.ENSP00000357873	0.048	0	0	0	0.157	0.085	0.9	0.396	0.947
ACY1	OTC	4447101	4432619	9606.ENSP00000384296	9606.ENSP00000039007	0.114	0	0	0	0.055	0	0.9	0.441	0.947
CXCL2	CX3CR1	4449392	4442101	9606.ENSP00000427279	9606.ENSP00000351059	0	0	0	0	0	0	0.9	0.497	0.947
EDN1	MMP2	4445200	4433061	9606.ENSP00000368683	9606.ENSP00000219070	0	0	0	0	0.061	0	0.8	0.738	0.946
ELANE	LCN2	4450799	4444080	9606.ENSP00000466090	9606.ENSP00000362108	0	0	0	0	0.12	0	0.9	0.442	0.946
CYP2E1	CYP3A4	4449959	4440831	9606.ENSP00000440689	9606.ENSP00000337915	0	0	0.441	0.618	0.061	0	0.9	0.922	0.946
STAT5A	LEP	4441128	4438805	9606.ENSP00000341208	9606.ENSP00000312652	0	0	0	0	0	0	0.9	0.485	0.946
LEP	STAT5B	4438805	4437006	9606.ENSP00000312652	9606.ENSP00000293328	0	0	0	0	0	0	0.9	0.482	0.946
IL6	IL1A	4447254	4435240	9606.ENSP00000385675	9606.ENSP00000263339	0	0	0	0	0.375	0	0	0.918	0.946
PLCG2	PRKCB	4451677	4438120	9606.ENSP00000482457	9606.ENSP00000305355	0	0	0	0	0.069	0.082	0.9	0.447	0.946
FOS	HMOX1	4438204	4432912	9606.ENSP00000306245	9606.ENSP00000216117	0	0	0	0	0	0	0.9	0.482	0.946
MAPK8	FYN	4446429	4441647	9606.ENSP00000378974	9606.ENSP00000346671	0	0	0.345	0.572	0.063	0.166	0.9	0.636	0.946
MAOB	CYP2D6	4444997	4442402	9606.ENSP00000367309	9606.ENSP00000353820	0	0	0	0	0.063	0	0.9	0.479	0.946
IGF2	TGFB1	4447717	4433189	9606.ENSP00000391826	9606.ENSP00000221930	0	0	0	0	0	0	0.9	0.491	0.946
STAT1	VCAM1	4442456	4437090	9606.ENSP00000354394	9606.ENSP00000294728	0	0	0	0	0.062	0	0.9	0.472	0.946
IKBKB	PRKCE	4449555	4438196	9606.ENSP00000430684	9606.ENSP00000306124	0	0	0	0.559	0.062	0.398	0.9	0.304	0.946
RASA1	RAF1	4436131	4434195	9606.ENSP00000274376	9606.ENSP00000251849	0	0	0	0	0.063	0.079	0.9	0.452	0.946
TGFB2	SERPINE1	4442765	4433266	9606.ENSP00000355896	9606.ENSP00000223095	0	0	0	0	0.098	0	0.9	0.455	0.946
ADH1C	ALDH2	4449347	4434937	9606.ENSP00000426083	9606.ENSP00000261733	0.048	0	0	0	0.087	0	0.65	0.843	0.946
EGF	SPARC	4435570	4433520	9606.ENSP00000265171	9606.ENSP00000231061	0	0	0	0	0.061	0	0.9	0.473	0.946
NOS1	ASS1	4451263	4443929	9606.ENSP00000477999	9606.ENSP00000361471	0	0	0	0	0.051	0	0.9	0.476	0.946
PCNA	CDK6	4445167	4435642	9606.ENSP00000368458	9606.ENSP00000265734	0	0	0	0	0.238	0.454	0.8	0.433	0.946
IL10	IFNG	4448642	4433446	9606.ENSP00000412237	9606.ENSP00000229135	0	0	0	0	0.064	0	0	0.944	0.946
CASP3	PRKCQ	4438651	4435203	9606.ENSP00000311032	9606.ENSP00000263125	0	0	0	0	0	0.379	0.9	0.211	0.946
IL6	PTGS2	4447254	4442894	9606.ENSP00000385675	9606.ENSP00000356438	0	0	0	0	0.314	0	0	0.922	0.945
IL4	HMOX1	4433533	4432912	9606.ENSP00000231449	9606.ENSP00000216117	0	0	0	0	0	0	0.9	0.475	0.945
MAPK8	RET	4446429	4441779	9606.ENSP00000378974	9606.ENSP00000347942	0	0	0	0.558	0.061	0.387	0.9	0.32	0.945
PML	RB1	4435801	4435747	9606.ENSP00000268058	9606.ENSP00000267163	0	0	0	0	0	0.379	0.9	0.187	0.945
SPARC	MMP2	4433520	4433061	9606.ENSP00000231061	9606.ENSP00000219070	0	0	0	0	0.886	0	0	0.54	0.945
INS	PPARG	4446661	4436745	9606.ENSP00000380432	9606.ENSP00000287820	0	0	0	0	0	0	0	0.944	0.945
AR	MAPK14	4444436	4433482	9606.ENSP00000363822	9606.ENSP00000229795	0	0	0	0	0	0.073	0.9	0.462	0.945
ERBB2	TP53	4435897	4435880	9606.ENSP00000269571	9606.ENSP00000269305	0	0	0	0	0	0.167	0	0.937	0.945
MMP1	IGF1	4439553	4437883	9606.ENSP00000322788	9606.ENSP00000302665	0	0	0	0	0	0	0.9	0.481	0.945
AR	NR3C2	4444436	4442077	9606.ENSP00000363822	9606.ENSP00000350815	0	0	0	0.779	0.061	0.379	0.9	0.67	0.945
ALOX5	IL4	4444382	4433533	9606.ENSP00000363512	9606.ENSP00000231449	0	0	0	0	0	0	0.9	0.473	0.945
BCL2	MAPK1	4446777	4432880	9606.ENSP00000381185	9606.ENSP00000215832	0	0	0	0	0	0.379	0.9	0.198	0.945
MAOB	MAOA	4444997	4441072	9606.ENSP00000367309	9606.ENSP00000340684	0	0	0.448	0.976	0.18	0.685	0.8	0.931	0.945
IGF2	MMP2	4447717	4433061	9606.ENSP00000391826	9606.ENSP00000219070	0	0	0	0	0.165	0	0.9	0.399	0.945
PRKCA	EGF	4448494	4435570	9606.ENSP00000408695	9606.ENSP00000265171	0	0	0	0	0	0	0.9	0.473	0.945
PRKCB	EGFR	4438120	4436186	9606.ENSP00000305355	9606.ENSP00000275493	0	0	0	0.553	0.049	0.403	0.9	0.304	0.945
HIF1A	EDN1	4449842	4445200	9606.ENSP00000437955	9606.ENSP00000368683	0	0	0	0	0	0	0.9	0.48	0.945
MAPK8	AR	4446429	4444436	9606.ENSP00000378974	9606.ENSP00000363822	0	0	0	0	0	0	0.9	0.479	0.945
STAT4	STAT1	4446006	4442456	9606.ENSP00000376134	9606.ENSP00000354394	0	0	0	0.945	0.055	0.447	0.9	0.734	0.945
AVP	ADRB1	4445364	4443292	9606.ENSP00000369647	9606.ENSP00000358301	0	0	0	0	0	0	0.9	0.481	0.945
RELA	CD40LG	4447098	4443586	9606.ENSP00000384273	9606.ENSP00000359663	0	0	0	0	0	0	0.9	0.477	0.945
AKT1	FYN	4450372	4441647	9606.ENSP00000451828	9606.ENSP00000346671	0	0	0.367	0.562	0.063	0.071	0.9	0.732	0.944
TNF	SMPD3	4448041	4433082	9606.ENSP00000398698	9606.ENSP00000219334	0	0	0	0	0	0.32	0.9	0.251	0.944
IGFBP3	F2	4445494	4438421	9606.ENSP00000370473	9606.ENSP00000308541	0	0	0	0	0.1	0.379	0.9	0.124	0.944
RASA1	MAPK1	4436131	4432880	9606.ENSP00000274376	9606.ENSP00000215832	0	0	0	0	0.061	0.05	0.9	0.446	0.944
CASP3	TP53	4438651	4435880	9606.ENSP00000311032	9606.ENSP00000269305	0	0	0	0	0.061	0	0	0.942	0.944
TNF	MMP9	4448041	4443919	9606.ENSP00000398698	9606.ENSP00000361405	0	0	0	0	0.176	0	0	0.935	0.944
CX3CR1	CXCL11	4442101	4438264	9606.ENSP00000351059	9606.ENSP00000306884	0	0	0	0	0	0	0.9	0.472	0.944
COL3A1	PLOD3	4438049	4433268	9606.ENSP00000304408	9606.ENSP00000223127	0	0	0	0	0.061	0.17	0.9	0.375	0.944
AVP	HCRT	4445364	4437007	9606.ENSP00000369647	9606.ENSP00000293330	0	0	0	0	0.078	0	0.9	0.446	0.944
NOS1	AKT1	4451263	4450372	9606.ENSP00000477999	9606.ENSP00000451828	0	0	0	0	0.049	0.065	0.8	0.725	0.944
TNF	IL1A	4448041	4435240	9606.ENSP00000398698	9606.ENSP00000263339	0	0	0	0	0.296	0	0	0.923	0.944
AR	NR3C1	4444436	4433539	9606.ENSP00000363822	9606.ENSP00000231509	0	0	0	0.816	0	0.379	0.9	0.806	0.944
SRC	PLAU	4444215	4444017	9606.ENSP00000362680	9606.ENSP00000361850	0	0	0	0	0.069	0.05	0.9	0.443	0.944
HADHA	MCCC2	4445432	4441355	9606.ENSP00000370023	9606.ENSP00000343657	0.072	0	0	0	0.116	0	0.9	0.401	0.944
MMP9	CTSD	4443919	4433665	9606.ENSP00000361405	9606.ENSP00000236671	0	0	0	0	0.08	0	0.9	0.445	0.944
PCNA	DNMT1	4445167	4442259	9606.ENSP00000368458	9606.ENSP00000352516	0.198	0	0	0	0.354	0.886	0	0.16	0.944
PRKCA	TERT	4448494	4438520	9606.ENSP00000408695	9606.ENSP00000309572	0	0	0	0	0	0.379	0.9	0.172	0.944
MPO	MAPK1	4433305	4432880	9606.ENSP00000225275	9606.ENSP00000215832	0	0	0	0	0	0.077	0.9	0.445	0.944
TGFB1	MAPK1	4433189	4432880	9606.ENSP00000221930	9606.ENSP00000215832	0	0	0	0	0.049	0.078	0.9	0.445	0.944
CX3CR1	PTGER3	4442101	4441881	9606.ENSP00000351059	9606.ENSP00000349003	0	0	0	0	0	0	0.9	0.459	0.943
GSK3B	NR3C1	4439717	4433539	9606.ENSP00000324806	9606.ENSP00000231509	0	0	0	0	0	0.085	0.9	0.432	0.943
STAT1	STAT5B	4442456	4437006	9606.ENSP00000354394	9606.ENSP00000293328	0	0	0	0.74	0.06	0.294	0.9	0.847	0.943
AVP	ADRB2	4445364	4438121	9606.ENSP00000369647	9606.ENSP00000305372	0	0	0	0	0	0	0.9	0.456	0.943
IL6	LEP	4447254	4438805	9606.ENSP00000385675	9606.ENSP00000312652	0	0	0	0	0	0	0	0.942	0.943
AKT1	CCND1	4450372	4433391	9606.ENSP00000451828	9606.ENSP00000227507	0	0	0	0	0.061	0	0	0.941	0.943
RB1	MAPK14	4435747	4433482	9606.ENSP00000267163	9606.ENSP00000229795	0	0	0	0	0.061	0.348	0.9	0.179	0.943
ESR1	EGFR	4448358	4436186	9606.ENSP00000405330	9606.ENSP00000275493	0	0	0	0	0	0.402	0	0.908	0.943
NR3C2	NR3C1	4442077	4433539	9606.ENSP00000350815	9606.ENSP00000231509	0	0	0	0.861	0	0.379	0.9	0.942	0.943
HTR2A	HCRT	4449830	4437007	9606.ENSP00000437737	9606.ENSP00000293330	0	0	0	0	0	0	0.9	0.458	0.943
VCAM1	NCF1	4437090	4436815	9606.ENSP00000294728	9606.ENSP00000289473	0	0	0	0	0.062	0	0.9	0.444	0.943
MAPK8	MAPK14	4446429	4433482	9606.ENSP00000378974	9606.ENSP00000229795	0	0	0.396	0.924	0.064	0.386	0.9	0.937	0.943
TOP2A	TYMS	4448614	4439011	9606.ENSP00000411532	9606.ENSP00000315644	0.112	0	0	0	0.83	0	0	0.653	0.943
TERT	RB1	4438520	4435747	9606.ENSP00000309572	9606.ENSP00000267163	0	0	0	0	0.064	0	0.9	0.44	0.943
RHO	PKD2	4437258	4433688	9606.ENSP00000296271	9606.ENSP00000237596	0	0	0	0	0	0	0.9	0.453	0.943
ELANE	MMP1	4450799	4439553	9606.ENSP00000466090	9606.ENSP00000322788	0	0	0	0	0.052	0	0.9	0.45	0.943
TOP2A	CSNK2A1	4448614	4433007	9606.ENSP00000411532	9606.ENSP00000217244	0	0	0	0	0.084	0.892	0	0.463	0.942
PRKCA	NFE2L2	4448494	4446632	9606.ENSP00000408695	9606.ENSP00000380252	0	0	0	0	0	0.379	0.9	0.145	0.942
FOS	TGFB1	4438204	4433189	9606.ENSP00000306245	9606.ENSP00000221930	0	0	0	0	0	0	0.9	0.448	0.942
SPP1	RUNX2	4446370	4443746	9606.ENSP00000378517	9606.ENSP00000360493	0	0	0	0	0.062	0	0	0.94	0.942
PTEN	PDGFB	4443848	4440178	9606.ENSP00000361021	9606.ENSP00000330382	0	0	0	0	0	0	0.9	0.448	0.942
GRIN2B	ERBB4	4451206	4441238	9606.ENSP00000477455	9606.ENSP00000342235	0	0	0	0	0.121	0	0.9	0.398	0.942
INS	DPP4	4446661	4442387	9606.ENSP00000380432	9606.ENSP00000353731	0	0	0	0	0	0	0	0.942	0.942
ARRB1	OPRM1	4448521	4447859	9606.ENSP00000409581	9606.ENSP00000394624	0	0	0	0	0	0.193	0.8	0.671	0.942
GATA3	CCND1	4445191	4433391	9606.ENSP00000368632	9606.ENSP00000227507	0	0	0	0	0.062	0	0.9	0.434	0.942
CHUK	FADD	4443527	4437802	9606.ENSP00000359424	9606.ENSP00000301838	0	0	0	0	0	0.063	0.9	0.435	0.942
PRLR	STAT3	4451730	4435468	9606.ENSP00000482954	9606.ENSP00000264657	0	0	0	0	0	0.107	0.9	0.405	0.942
MAP2K4	TNF	4448551	4448041	9606.ENSP00000410402	9606.ENSP00000398698	0	0	0	0	0	0	0.9	0.446	0.942
FOXP3	JUN	4444690	4443699	9606.ENSP00000365380	9606.ENSP00000360266	0	0	0	0	0	0.082	0.9	0.427	0.942
PRKCD	RAF1	4446312	4434195	9606.ENSP00000378217	9606.ENSP00000251849	0	0	0	0.581	0.065	0.398	0.9	0.166	0.942
PCCB	ACADM	4449005	4443625	9606.ENSP00000419027	9606.ENSP00000359871	0.071	0	0	0	0.108	0	0.9	0.387	0.942
PRKCA	NFKB1	4448494	4433374	9606.ENSP00000408695	9606.ENSP00000226574	0	0	0	0	0	0.261	0.9	0.286	0.942
RELA	IL4	4447098	4433533	9606.ENSP00000384273	9606.ENSP00000231449	0	0	0	0	0	0	0.9	0.451	0.942
MAOA	ALDH2	4441072	4434937	9606.ENSP00000340684	9606.ENSP00000261733	0	0	0	0	0.064	0	0.9	0.431	0.942
LCN2	STAT3	4444080	4435468	9606.ENSP00000362108	9606.ENSP00000264657	0	0	0	0	0.062	0	0.9	0.44	0.942
TGFB2	PDGFB	4442765	4440178	9606.ENSP00000355896	9606.ENSP00000330382	0	0	0	0	0.07	0	0.9	0.42	0.941
ERBB4	ERBB2	4441238	4435897	9606.ENSP00000342235	9606.ENSP00000269571	0	0	0	0.93	0	0.404	0.9	0.924	0.941
MAPK14	IL2	4433482	4433376	9606.ENSP00000229795	9606.ENSP00000226730	0	0	0	0	0	0	0.9	0.44	0.941
CYP19A1	CYP1A1	4446543	4445265	9606.ENSP00000379683	9606.ENSP00000369050	0	0	0.409	0.563	0	0	0.9	0.68	0.941
IGF1	SPARC	4437883	4433520	9606.ENSP00000302665	9606.ENSP00000231061	0	0	0	0	0	0	0.9	0.441	0.941
FYN	MAPK1	4441647	4432880	9606.ENSP00000346671	9606.ENSP00000215832	0	0	0.313	0.616	0.061	0.157	0.9	0.643	0.941
VEGFA	FYN	4451310	4441647	9606.ENSP00000478570	9606.ENSP00000346671	0	0	0	0	0	0	0.9	0.441	0.941
PLCG2	FGFR2	4451677	4448546	9606.ENSP00000482457	9606.ENSP00000410294	0	0	0	0	0.054	0.711	0.8	0.064	0.941
PPARG	RB1	4436745	4435747	9606.ENSP00000287820	9606.ENSP00000267163	0	0	0	0	0	0.315	0.9	0.221	0.941
NFE2L2	NQO1	4446632	4439310	9606.ENSP00000380252	9606.ENSP00000319788	0	0	0	0	0	0	0	0.94	0.941
RXRA	MAPK1	4449061	4432880	9606.ENSP00000419692	9606.ENSP00000215832	0	0	0	0	0	0.363	0.9	0.154	0.941
IGF2	TGFB2	4447717	4442765	9606.ENSP00000391826	9606.ENSP00000355896	0	0	0	0	0.07	0	0.9	0.423	0.941
SRC	MAPK14	4444215	4433482	9606.ENSP00000362680	9606.ENSP00000229795	0	0	0.254	0.627	0	0.146	0.9	0.765	0.941
PRKCD	ADRA2A	4446312	4436361	9606.ENSP00000378217	9606.ENSP00000280155	0	0	0	0	0	0.379	0.9	0.137	0.941
EDN1	NOS3	4445200	4437409	9606.ENSP00000368683	9606.ENSP00000297494	0	0	0	0	0	0	0	0.941	0.941
AKT1	BCL2	4450372	4446777	9606.ENSP00000451828	9606.ENSP00000381185	0	0	0	0	0.061	0	0.9	0.426	0.941
FOS	IL1A	4438204	4435240	9606.ENSP00000306245	9606.ENSP00000263339	0	0	0	0	0.062	0	0.9	0.425	0.941
CXCL10	CCL2	4438146	4433339	9606.ENSP00000305651	9606.ENSP00000225831	0	0	0	0	0.158	0	0	0.933	0.941
PRKCA	MAPK1	4448494	4432880	9606.ENSP00000408695	9606.ENSP00000215832	0	0	0	0.594	0.056	0.261	0.9	0.575	0.941
PRKCA	CHUK	4448494	4443527	9606.ENSP00000408695	9606.ENSP00000359424	0	0	0	0.568	0	0.358	0.9	0.31	0.941
AVP	F2	4445364	4438421	9606.ENSP00000369647	9606.ENSP00000308541	0	0	0	0	0	0	0.9	0.441	0.941
JUN	IL1A	4443699	4435240	9606.ENSP00000360266	9606.ENSP00000263339	0	0	0	0	0	0	0.9	0.442	0.941
RELA	SRC	4447098	4444215	9606.ENSP00000384273	9606.ENSP00000362680	0	0	0	0	0.063	0	0.9	0.427	0.941
ESR1	ESR2	4448358	4441379	9606.ENSP00000405330	9606.ENSP00000343925	0	0	0	0.925	0.061	0.379	0.9	0.967	0.941
VCAM1	ICAM1	4437090	4435501	9606.ENSP00000294728	9606.ENSP00000264832	0	0	0	0	0.069	0	0	0.938	0.94
VCAM1	CCL2	4437090	4433339	9606.ENSP00000294728	9606.ENSP00000225831	0	0	0	0	0.206	0	0	0.927	0.94
NFE2L2	FOS	4446632	4438204	9606.ENSP00000380252	9606.ENSP00000306245	0	0	0	0	0	0.051	0.9	0.426	0.94
PTGS1	MPO	4442503	4433305	9606.ENSP00000354612	9606.ENSP00000225275	0	0	0	0	0.076	0	0.9	0.408	0.94
BTK	JUN	4451790	4443699	9606.ENSP00000483570	9606.ENSP00000360266	0	0	0	0	0	0.079	0.9	0.405	0.94
ARG1	MPO	4441926	4433305	9606.ENSP00000349446	9606.ENSP00000225275	0	0	0	0	0.102	0	0.9	0.39	0.94
IKBKB	FADD	4449555	4437802	9606.ENSP00000430684	9606.ENSP00000301838	0	0	0	0	0	0.063	0.9	0.419	0.94
PCNA	E2F1	4445167	4441534	9606.ENSP00000368458	9606.ENSP00000345571	0	0	0	0	0.172	0	0.9	0.343	0.94
PCCA	ACADM	4444705	4443625	9606.ENSP00000365462	9606.ENSP00000359871	0.071	0	0	0	0.104	0	0.9	0.356	0.939
STAT1	NR3C1	4442456	4433539	9606.ENSP00000354394	9606.ENSP00000231509	0	0	0	0	0.065	0.053	0.9	0.4	0.939
STAT4	NFKB1	4446006	4433374	9606.ENSP00000376134	9606.ENSP00000226574	0	0	0	0	0.055	0.064	0.9	0.4	0.939
ASS1	NOS2	4443929	4439909	9606.ENSP00000361471	9606.ENSP00000327251	0	0	0	0	0.051	0	0.9	0.416	0.939
ERBB4	ERBB3	4441238	4435741	9606.ENSP00000342235	9606.ENSP00000267101	0	0	0	0.931	0	0.379	0.9	0.926	0.939
PTPN1	IGF1	4443784	4437883	9606.ENSP00000360683	9606.ENSP00000302665	0	0	0	0	0	0	0.9	0.422	0.939
RELA	PRKACA	4447098	4438521	9606.ENSP00000384273	9606.ENSP00000309591	0	0	0	0	0.069	0.379	0.9	0.072	0.939
IKBKB	PRKCA	4449555	4448494	9606.ENSP00000430684	9606.ENSP00000408695	0	0	0	0.567	0	0.358	0.9	0.268	0.939
SLPI	LYZ	4441219	4434847	9606.ENSP00000342082	9606.ENSP00000261267	0	0	0	0	0.096	0	0.9	0.387	0.939
ELANE	CTSD	4450799	4433665	9606.ENSP00000466090	9606.ENSP00000236671	0	0	0	0	0	0	0.9	0.421	0.939
ADORA3	CXCL8	4443373	4438229	9606.ENSP00000358730	9606.ENSP00000306512	0	0	0	0	0	0	0.9	0.419	0.939
PRKCD	NFKB1	4446312	4433374	9606.ENSP00000378217	9606.ENSP00000226574	0	0	0	0	0.089	0.084	0.9	0.358	0.939
IGF2	PDGFB	4447717	4440178	9606.ENSP00000391826	9606.ENSP00000330382	0	0	0	0	0	0	0.9	0.42	0.939
PRKACA	NFKB1	4438521	4433374	9606.ENSP00000309591	9606.ENSP00000226574	0	0	0	0	0.097	0.386	0.9	0.041	0.939
F2	C5	4438421	4433289	9606.ENSP00000308541	9606.ENSP00000223642	0	0	0	0	0.158	0.05	0.9	0.328	0.939
RELA	CCL2	4447098	4433339	9606.ENSP00000384273	9606.ENSP00000225831	0	0	0	0	0	0.379	0.8	0.555	0.939
IL6	IFNG	4447254	4433446	9606.ENSP00000385675	9606.ENSP00000229135	0	0	0	0	0.064	0	0	0.937	0.939
CDK1	CDK4	4446389	4434582	9606.ENSP00000378699	9606.ENSP00000257904	0	0	0.436	0.905	0.215	0.185	0.9	0.935	0.939
BTK	SRC	4451790	4444215	9606.ENSP00000483570	9606.ENSP00000362680	0	0	0	0.85	0.062	0.315	0.9	0.935	0.939
INS	IGFBP3	4446661	4445494	9606.ENSP00000380432	9606.ENSP00000370473	0	0	0	0	0	0	0	0.937	0.938
PPARA	JUN	4447242	4443699	9606.ENSP00000385523	9606.ENSP00000360266	0	0	0	0	0	0.082	0.9	0.385	0.938
STAT4	STAT3	4446006	4435468	9606.ENSP00000376134	9606.ENSP00000264657	0	0	0	0.935	0	0.379	0.9	0.868	0.938
BRCA1	PCNA	4448999	4445167	9606.ENSP00000418960	9606.ENSP00000368458	0	0	0	0	0.277	0.112	0.9	0.16	0.938
FYN	RASA1	4441647	4436131	9606.ENSP00000346671	9606.ENSP00000274376	0	0	0	0.555	0.063	0.288	0.9	0.369	0.938
F10	F2	4444587	4438421	9606.ENSP00000364709	9606.ENSP00000308541	0	0	0.391	0.763	0.2	0	0.9	0.806	0.938
MAOA	ADH1B	4441072	4438237	9606.ENSP00000340684	9606.ENSP00000306606	0	0	0	0	0.103	0	0.9	0.368	0.938
CD40LG	NFKB1	4443586	4433374	9606.ENSP00000359663	9606.ENSP00000226574	0	0	0	0	0	0.059	0.9	0.397	0.938
IFNG	IL2	4433446	4433376	9606.ENSP00000229135	9606.ENSP00000226730	0	0	0	0	0.087	0	0	0.935	0.938
ARRB1	RAF1	4448521	4434195	9606.ENSP00000409581	9606.ENSP00000251849	0	0	0	0	0.062	0.261	0.9	0.217	0.938
CASP3	BCL2L1	4438651	4437866	9606.ENSP00000311032	9606.ENSP00000302564	0	0	0	0	0	0.168	0	0.927	0.937
FGF1	MAPK1	4451524	4432880	9606.ENSP00000480791	9606.ENSP00000215832	0	0	0	0	0	0	0.9	0.397	0.937
HIF1A	CDKN1A	4449842	4447168	9606.ENSP00000437955	9606.ENSP00000384849	0	0	0	0	0	0	0.9	0.399	0.937
CDK1	SRC	4446389	4444215	9606.ENSP00000378699	9606.ENSP00000362680	0	0	0.259	0.648	0.062	0.093	0.9	0.75	0.937
GATA3	IL4	4445191	4433533	9606.ENSP00000368632	9606.ENSP00000231449	0	0	0	0	0.062	0	0	0.935	0.937
EZR	VCAM1	4442801	4437090	9606.ENSP00000356042	9606.ENSP00000294728	0	0	0	0	0	0.342	0.8	0.561	0.937
CYP19A1	CYP3A4	4446543	4440831	9606.ENSP00000379683	9606.ENSP00000337915	0	0	0.419	0.577	0	0	0.9	0.609	0.937
PRKCA	PRKCB	4448494	4438120	9606.ENSP00000408695	9606.ENSP00000305355	0	0	0	0.981	0	0.39	0.9	0.9	0.937
AVP	EGF	4445364	4435570	9606.ENSP00000369647	9606.ENSP00000265171	0	0	0	0	0.113	0	0.9	0.348	0.937
PCNA	CCNB1	4445167	4434484	9606.ENSP00000368458	9606.ENSP00000256442	0	0	0	0	0.807	0.527	0	0.372	0.937
GRIN2B	GRIN2A	4451206	4446563	9606.ENSP00000477455	9606.ENSP00000379818	0	0	0	0.945	0.175	0.268	0.9	0.961	0.937
ADORA1	CXCL8	4442839	4438229	9606.ENSP00000356205	9606.ENSP00000306512	0	0	0	0	0	0	0.9	0.396	0.937
F2	IGF1	4438421	4437883	9606.ENSP00000308541	9606.ENSP00000302665	0	0	0	0	0.104	0	0.9	0.361	0.937
PDGFB	SERPINE1	4440178	4433266	9606.ENSP00000330382	9606.ENSP00000223095	0	0	0	0	0	0	0.9	0.404	0.937
PLCG2	PRKCD	4451677	4446312	9606.ENSP00000482457	9606.ENSP00000378217	0	0	0	0	0.063	0.129	0.9	0.323	0.937
PRLR	STAT1	4451730	4442456	9606.ENSP00000482954	9606.ENSP00000354394	0	0	0	0	0	0.107	0.9	0.36	0.937
PDGFB	STAT3	4440178	4435468	9606.ENSP00000330382	9606.ENSP00000264657	0	0	0	0	0	0	0.9	0.4	0.937
MAPK9	BCL2L1	4447857	4437866	9606.ENSP00000394560	9606.ENSP00000302564	0	0	0	0	0.082	0.356	0.8	0.53	0.937
DNMT3A	CCND1	4435481	4433391	9606.ENSP00000264709	9606.ENSP00000227507	0	0	0	0	0	0	0.9	0.398	0.937
ELANE	MAPK1	4450799	4432880	9606.ENSP00000466090	9606.ENSP00000215832	0	0	0	0	0	0.053	0.9	0.397	0.937
ADRB2	EGFR	4438121	4436186	9606.ENSP00000305372	9606.ENSP00000275493	0	0	0	0	0	0.186	0.9	0.293	0.937
PPARA	CYP1A1	4447242	4445265	9606.ENSP00000385523	9606.ENSP00000369050	0	0	0	0	0.063	0.085	0.9	0.359	0.937
TGFB2	SPARC	4442765	4433520	9606.ENSP00000355896	9606.ENSP00000231061	0	0	0	0	0.09	0.085	0.9	0.329	0.936
FYN	EGFR	4441647	4436186	9606.ENSP00000346671	9606.ENSP00000275493	0	0	0	0.676	0	0.185	0.9	0.777	0.936
BIRC5	RASA1	4437778	4436131	9606.ENSP00000301633	9606.ENSP00000274376	0	0	0	0	0.055	0.379	0.9	0.049	0.936
NOS1	PRKCA	4451263	4448494	9606.ENSP00000477999	9606.ENSP00000408695	0	0	0	0	0.061	0.305	0.9	0.131	0.935
PRKACA	NR3C1	4438521	4433539	9606.ENSP00000309591	9606.ENSP00000231509	0	0	0	0	0.049	0.379	0.9	0	0.935
MAPK8	NFKB1	4446429	4433374	9606.ENSP00000378974	9606.ENSP00000226574	0	0	0	0	0.068	0.261	0.8	0.589	0.935
SRC	FOS	4444215	4438204	9606.ENSP00000362680	9606.ENSP00000306245	0	0	0	0	0	0.084	0.8	0.676	0.935
ERBB4	EGFR	4441238	4436186	9606.ENSP00000342235	9606.ENSP00000275493	0	0	0	0.946	0	0.347	0.9	0.905	0.935
CCNB1	CCND1	4434484	4433391	9606.ENSP00000256442	9606.ENSP00000227507	0	0	0	0.65	0.096	0.064	0.9	0.861	0.935
STAT2	CSF2	4439022	4437349	9606.ENSP00000315768	9606.ENSP00000296871	0	0	0	0	0	0	0.9	0.384	0.935
PDGFB	KDR	4440178	4435337	9606.ENSP00000330382	9606.ENSP00000263923	0	0	0	0	0.076	0.393	0.6	0.746	0.935
ABCB1	MAPK8	4451279	4446429	9606.ENSP00000478255	9606.ENSP00000378974	0	0	0	0	0	0	0.9	0.381	0.935
EZR	ICAM1	4442801	4435501	9606.ENSP00000356042	9606.ENSP00000264832	0	0	0	0	0.05	0.435	0.8	0.473	0.935
ERBB4	MAPK1	4441238	4432880	9606.ENSP00000342235	9606.ENSP00000215832	0	0	0	0.583	0	0.185	0.9	0.594	0.935
SPP1	IGFBP3	4446370	4445494	9606.ENSP00000378517	9606.ENSP00000370473	0	0	0	0	0.07	0	0.9	0.359	0.935
PRKCQ	MAPK1	4435203	4432880	9606.ENSP00000263125	9606.ENSP00000215832	0	0	0	0.594	0.062	0.262	0.9	0.349	0.934
SPARC	SERPINE1	4433520	4433266	9606.ENSP00000231061	9606.ENSP00000223095	0	0	0	0	0.125	0	0.9	0.312	0.934
ERBB4	EGF	4441238	4435570	9606.ENSP00000342235	9606.ENSP00000265171	0	0	0	0	0.177	0.078	0.6	0.809	0.934
NR3C1	MAPK14	4433539	4433482	9606.ENSP00000231509	9606.ENSP00000229795	0	0	0	0	0	0.073	0.9	0.347	0.934
PTAFR	ICAM1	4444275	4435501	9606.ENSP00000362965	9606.ENSP00000264832	0	0	0	0	0.079	0	0.9	0.349	0.934
SRC	FLT4	4444215	4434983	9606.ENSP00000362680	9606.ENSP00000261937	0	0	0	0.655	0.058	0.161	0.9	0.689	0.934
TGFB2	TGFB1	4442765	4433189	9606.ENSP00000355896	9606.ENSP00000221930	0	0	0	0.902	0	0.32	0.9	0.793	0.934
TNF	TNFSF11	4448041	4446858	9606.ENSP00000398698	9606.ENSP00000381775	0	0	0	0.611	0	0	0.9	0.879	0.934
SRC	NFKB1	4444215	4433374	9606.ENSP00000362680	9606.ENSP00000226574	0	0	0	0	0.063	0.125	0.9	0.296	0.934
ELANE	LYZ	4450799	4434847	9606.ENSP00000466090	9606.ENSP00000261267	0	0	0	0	0.112	0	0.9	0.323	0.934
MAOB	ALDH2	4444997	4434937	9606.ENSP00000367309	9606.ENSP00000261733	0	0	0	0	0.083	0	0.9	0.346	0.934
MMP9	CXCL8	4443919	4438229	9606.ENSP00000361405	9606.ENSP00000306512	0	0	0	0	0.134	0.379	0	0.885	0.933
AKT1	EGF	4450372	4435570	9606.ENSP00000451828	9606.ENSP00000265171	0	0	0	0	0	0.05	0	0.932	0.933
TNF	SELE	4448041	4440292	9606.ENSP00000398698	9606.ENSP00000331736	0	0	0	0	0.057	0.185	0	0.92	0.933
PTAFR	PLAU	4444275	4444017	9606.ENSP00000362965	9606.ENSP00000361850	0	0	0	0	0.063	0	0.9	0.35	0.933
RASSF1	CCND1	4441940	4433391	9606.ENSP00000349547	9606.ENSP00000227507	0	0	0	0	0	0	0.8	0.683	0.933
ACY1	ARG1	4447101	4441926	9606.ENSP00000384296	9606.ENSP00000349446	0	0	0	0	0.058	0	0.9	0.349	0.933
POLA1	TYMS	4445155	4439011	9606.ENSP00000368349	9606.ENSP00000315644	0	0	0	0	0.846	0.05	0	0.582	0.933
CDK2	MAPK1	4435732	4432880	9606.ENSP00000266970	9606.ENSP00000215832	0	0	0.399	0.863	0.049	0.261	0.9	0.636	0.933
ARRB1	EGF	4448521	4435570	9606.ENSP00000409581	9606.ENSP00000265171	0	0	0	0	0.048	0.085	0.9	0.324	0.933
HIF1A	NR3C1	4449842	4433539	9606.ENSP00000437955	9606.ENSP00000231509	0	0	0	0	0	0.095	0.9	0.326	0.933
FGFR2	JUN	4448546	4443699	9606.ENSP00000410294	9606.ENSP00000360266	0	0	0	0	0	0.124	0.9	0.287	0.932
STAT3	IL1A	4435468	4435240	9606.ENSP00000264657	9606.ENSP00000263339	0	0	0	0	0	0	0.9	0.354	0.932
MAPK9	IL2	4447857	4433376	9606.ENSP00000394560	9606.ENSP00000226730	0	0	0	0	0	0	0.9	0.348	0.932
ASS1	OAT	4443929	4443204	9606.ENSP00000361471	9606.ENSP00000357838	0.295	0	0	0	0.347	0	0	0.865	0.932
SELE	VCAM1	4440292	4437090	9606.ENSP00000331736	9606.ENSP00000294728	0	0	0	0	0.12	0	0	0.926	0.932
AKT1	AR	4450372	4444436	9606.ENSP00000451828	9606.ENSP00000363822	0	0	0	0	0	0.407	0	0.89	0.932
CXCL2	IL6	4449392	4447254	9606.ENSP00000427279	9606.ENSP00000385675	0	0	0	0	0.631	0	0	0.825	0.932
OPRM1	DRD2	4447859	4442557	9606.ENSP00000394624	9606.ENSP00000354859	0	0	0	0.583	0	0	0.9	0.789	0.932
FAS	STAT5A	4441783	4441128	9606.ENSP00000347979	9606.ENSP00000341208	0	0	0	0	0.062	0	0.9	0.335	0.932
INS	CACNA1D	4446661	4436764	9606.ENSP00000380432	9606.ENSP00000288139	0	0	0	0	0	0	0.9	0.355	0.932
FYN	MAPK14	4441647	4433482	9606.ENSP00000346671	9606.ENSP00000229795	0	0	0.239	0.622	0.061	0.146	0.9	0.459	0.932
RELA	IL1A	4447098	4435240	9606.ENSP00000384273	9606.ENSP00000263339	0	0	0	0	0	0	0.9	0.356	0.932
MAOA	CYP3A4	4441072	4440831	9606.ENSP00000340684	9606.ENSP00000337915	0	0	0	0	0.063	0	0.9	0.34	0.932
MYC	PPARA	4451407	4447242	9606.ENSP00000479618	9606.ENSP00000385523	0	0	0	0	0	0	0.9	0.355	0.932
HTR2A	EDN1	4449830	4445200	9606.ENSP00000437737	9606.ENSP00000368683	0	0	0	0	0	0.157	0.9	0.261	0.932
CDK1	CDK6	4446389	4435642	9606.ENSP00000378699	9606.ENSP00000265734	0	0	0.425	0.923	0.154	0.185	0.9	0.864	0.932
NOS2	OTC	4439909	4432619	9606.ENSP00000327251	9606.ENSP00000039007	0	0	0	0	0.091	0	0.9	0.304	0.931
RELA	TLR4	4447098	4444300	9606.ENSP00000384273	9606.ENSP00000363089	0	0	0	0	0	0.082	0.8	0.659	0.931
TH	TAT	4445511	4441813	9606.ENSP00000370571	9606.ENSP00000348234	0	0	0	0	0.143	0	0.9	0.266	0.931
RELA	STAT4	4447098	4446006	9606.ENSP00000384273	9606.ENSP00000376134	0	0	0	0	0.048	0	0.9	0.335	0.931
PDGFB	PLG	4440178	4438461	9606.ENSP00000330382	9606.ENSP00000308938	0	0	0	0	0	0	0.9	0.341	0.931
LCN2	LYZ	4444080	4434847	9606.ENSP00000362108	9606.ENSP00000261267	0	0	0	0	0.101	0	0.9	0.297	0.931
F2	MAPK1	4438421	4432880	9606.ENSP00000308541	9606.ENSP00000215832	0	0	0	0	0	0.053	0.9	0.331	0.931
FYN	ERBB4	4441647	4441238	9606.ENSP00000346671	9606.ENSP00000342235	0	0	0	0.698	0	0.185	0.9	0.637	0.931
IGF2	SERPINE1	4447717	4433266	9606.ENSP00000391826	9606.ENSP00000223095	0	0	0	0	0.088	0	0.9	0.311	0.931
IL10	PTAFR	4448642	4444275	9606.ENSP00000412237	9606.ENSP00000362965	0	0	0	0	0.089	0	0.9	0.309	0.931
SHH	CCNB1	4437380	4434484	9606.ENSP00000297261	9606.ENSP00000256442	0	0	0	0	0	0.051	0.9	0.331	0.931
CDK1	SHH	4446389	4437380	9606.ENSP00000378699	9606.ENSP00000297261	0	0	0	0	0	0.131	0.9	0.272	0.931
BCL2	STAT3	4446777	4435468	9606.ENSP00000381185	9606.ENSP00000264657	0	0	0	0	0	0.186	0.9	0.225	0.931
AKT1	MAPK14	4450372	4433482	9606.ENSP00000451828	9606.ENSP00000229795	0	0	0.303	0.623	0.082	0.715	0.6	0.858	0.931
MAPK9	WNT5A	4447857	4435460	9606.ENSP00000394560	9606.ENSP00000264634	0	0	0	0	0.051	0	0.9	0.34	0.931
EGFR	FGF2	4436186	4435443	9606.ENSP00000275493	9606.ENSP00000264498	0	0	0	0	0.098	0	0.6	0.824	0.931
FAS	STAT5B	4441783	4437006	9606.ENSP00000347979	9606.ENSP00000293328	0	0	0	0	0.055	0	0.9	0.324	0.93
AKT1	RXRA	4450372	4449061	9606.ENSP00000451828	9606.ENSP00000419692	0	0	0	0	0.085	0.085	0.9	0.271	0.93
DNMT3A	CDK4	4435481	4434582	9606.ENSP00000264709	9606.ENSP00000257904	0	0	0	0	0	0	0.9	0.33	0.93
CYP2E1	CYP1A2	4449959	4441211	9606.ENSP00000440689	9606.ENSP00000342007	0	0	0.442	0.769	0.062	0	0.9	0.921	0.93
DRD2	OPRK1	4442557	4435619	9606.ENSP00000354859	9606.ENSP00000265572	0	0	0	0.596	0.064	0	0.9	0.722	0.93
PIK3CG	FYN	4442215	4441647	9606.ENSP00000352121	9606.ENSP00000346671	0	0	0	0	0.062	0.124	0.9	0.257	0.93
TLR4	CXCL8	4444300	4438229	9606.ENSP00000363089	9606.ENSP00000306512	0	0	0	0	0.116	0	0	0.924	0.93
NOS1	OTC	4451263	4432619	9606.ENSP00000477999	9606.ENSP00000039007	0	0	0	0	0.063	0	0.9	0.319	0.93
POLE	CDK2	4439536	4435732	9606.ENSP00000322570	9606.ENSP00000266970	0	0	0	0	0.155	0.152	0.9	0.145	0.93
SRC	FLT1	4444215	4436489	9606.ENSP00000362680	9606.ENSP00000282397	0	0	0	0.657	0.058	0.161	0.9	0.569	0.93
HMGCL	CAT	4444400	4433793	9606.ENSP00000363614	9606.ENSP00000241052	0	0	0	0	0.063	0.111	0.9	0.261	0.93
AKT1	MAP2K4	4450372	4448551	9606.ENSP00000451828	9606.ENSP00000410402	0	0	0.257	0.592	0.099	0.439	0.8	0.765	0.93
RELA	MTOR	4447098	4442490	9606.ENSP00000384273	9606.ENSP00000354558	0	0	0	0	0	0	0.9	0.33	0.93
ADRB1	ADRB2	4443292	4438121	9606.ENSP00000358301	9606.ENSP00000305372	0	0	0	0.937	0	0.299	0.9	0.864	0.93
OPRM1	PTGER3	4447859	4441881	9606.ENSP00000394624	9606.ENSP00000349003	0	0	0	0	0	0	0.9	0.335	0.93
AKT1	PML	4450372	4435801	9606.ENSP00000451828	9606.ENSP00000268058	0	0	0	0	0	0.064	0.9	0.311	0.929
MET	MAPK1	4439114	4432880	9606.ENSP00000317272	9606.ENSP00000215832	0	0	0	0.589	0.059	0.146	0.9	0.481	0.929
TRPV1	SRC	4450642	4444215	9606.ENSP00000461007	9606.ENSP00000362680	0	0	0	0	0	0	0.8	0.662	0.929
MMP9	LYZ	4443919	4434847	9606.ENSP00000361405	9606.ENSP00000261267	0	0	0	0	0.134	0	0.9	0.251	0.929
XDH	HPRT1	4445208	4437502	9606.ENSP00000368727	9606.ENSP00000298556	0	0	0	0	0.062	0	0.9	0.307	0.929
FOXP3	IL4	4444690	4433533	9606.ENSP00000365380	9606.ENSP00000231449	0	0	0	0	0	0	0	0.929	0.929
BTK	FOS	4451790	4438204	9606.ENSP00000483570	9606.ENSP00000306245	0	0	0	0	0	0.084	0.9	0.289	0.929
CPS1	NAGS	4448239	4437012	9606.ENSP00000402608	9606.ENSP00000293404	0.185	0	0	0	0.226	0	0	0.896	0.929
ICAM1	CCL2	4435501	4433339	9606.ENSP00000264832	9606.ENSP00000225831	0	0	0	0	0.149	0	0	0.919	0.929
IRF1	NR3C1	4433930	4433539	9606.ENSP00000245414	9606.ENSP00000231509	0	0	0	0	0	0	0.9	0.326	0.929
OXTR	HCRT	4439675	4437007	9606.ENSP00000324270	9606.ENSP00000293330	0	0	0	0	0	0	0.9	0.32	0.929
MAPT	MAPK1	4441081	4432880	9606.ENSP00000340820	9606.ENSP00000215832	0	0	0	0	0	0	0.8	0.662	0.929
VEGFA	MET	4451310	4439114	9606.ENSP00000478570	9606.ENSP00000317272	0	0	0	0	0.067	0	0.6	0.826	0.929
FOXP3	FOS	4444690	4438204	9606.ENSP00000365380	9606.ENSP00000306245	0	0	0	0	0	0.05	0.9	0.314	0.929
IGF2	SPARC	4447717	4433520	9606.ENSP00000391826	9606.ENSP00000231061	0	0	0	0	0.118	0	0.9	0.25	0.928
RET	RASA1	4441779	4436131	9606.ENSP00000347942	9606.ENSP00000274376	0	0	0	0	0	0.149	0.9	0.222	0.928
NOS3	OTC	4437409	4432619	9606.ENSP00000297494	9606.ENSP00000039007	0	0	0	0	0.063	0	0.9	0.301	0.928
CASP1	CASP3	4449658	4438651	9606.ENSP00000433138	9606.ENSP00000311032	0	0	0	0.658	0	0	0.9	0.831	0.928
MTOR	NFKB1	4442490	4433374	9606.ENSP00000354558	9606.ENSP00000226574	0	0	0	0	0.055	0.126	0.9	0.237	0.928
IKBKB	CSF2	4449555	4437349	9606.ENSP00000430684	9606.ENSP00000296871	0	0	0	0	0	0	0.9	0.31	0.928
CXCL8	ICAM1	4438229	4435501	9606.ENSP00000306512	9606.ENSP00000264832	0	0	0	0	0.214	0	0	0.912	0.928
ADRA2A	OPRK1	4436361	4435619	9606.ENSP00000280155	9606.ENSP00000265572	0	0	0	0.6	0.054	0	0.9	0.702	0.928
ADCYAP1	AVP	4450674	4445364	9606.ENSP00000462647	9606.ENSP00000369647	0	0	0	0	0.064	0	0.9	0.3	0.928
TCF3	MAPK14	4435174	4433482	9606.ENSP00000262965	9606.ENSP00000229795	0	0	0	0	0	0	0.9	0.314	0.928
PPARA	EDN1	4447242	4445200	9606.ENSP00000385523	9606.ENSP00000368683	0	0	0	0	0	0	0.9	0.31	0.928
ADRB2	EGF	4438121	4435570	9606.ENSP00000305372	9606.ENSP00000265171	0	0	0	0	0	0.062	0.9	0.295	0.928
TH	SLC6A3	4445511	4435941	9606.ENSP00000370571	9606.ENSP00000270349	0	0	0	0	0.062	0	0	0.927	0.928
PTAFR	STAT3	4444275	4435468	9606.ENSP00000362965	9606.ENSP00000264657	0	0	0	0	0	0	0.9	0.311	0.928
PCNA	RB1	4445167	4435747	9606.ENSP00000368458	9606.ENSP00000267163	0	0	0	0	0.129	0	0.9	0.246	0.928
NQO1	ODC1	4439310	4433616	9606.ENSP00000319788	9606.ENSP00000234111	0	0	0	0	0	0	0.9	0.31	0.928
ELANE	ARG1	4450799	4441926	9606.ENSP00000466090	9606.ENSP00000349446	0	0	0	0	0.108	0	0.9	0.26	0.928
VDR	RUNX2	4450226	4443746	9606.ENSP00000447173	9606.ENSP00000360493	0	0	0	0	0.062	0.727	0	0.738	0.927
CD40LG	MAPK14	4443586	4433482	9606.ENSP00000359663	9606.ENSP00000229795	0	0	0	0	0	0	0.9	0.303	0.927
PIK3CG	PDGFB	4442215	4440178	9606.ENSP00000352121	9606.ENSP00000330382	0	0	0	0	0	0	0.9	0.3	0.927
PRKCB	MAPK1	4438120	4432880	9606.ENSP00000305355	9606.ENSP00000215832	0	0	0	0.59	0.056	0.158	0.9	0.414	0.927
CYP2E1	GSTM1	4449959	4438694	9606.ENSP00000440689	9606.ENSP00000311469	0	0	0	0	0.057	0.077	0.65	0.79	0.927
BTK	MAPK8	4451790	4446429	9606.ENSP00000483570	9606.ENSP00000378974	0	0	0	0.568	0.061	0.115	0.9	0.48	0.927
ADORA1	DRD2	4442839	4442557	9606.ENSP00000356205	9606.ENSP00000354859	0	0	0	0.642	0.088	0	0.9	0.669	0.927
ELANE	C5	4450799	4433289	9606.ENSP00000466090	9606.ENSP00000223642	0	0	0	0	0.049	0.05	0.9	0.294	0.927
OPRM1	ADRA2A	4447859	4436361	9606.ENSP00000394624	9606.ENSP00000280155	0	0	0	0.6	0	0	0.9	0.71	0.927
VDR	CYP27B1	4450226	4433420	9606.ENSP00000447173	9606.ENSP00000228606	0	0	0	0	0.063	0.133	0	0.917	0.927
CYP2E1	CYP1A1	4449959	4445265	9606.ENSP00000440689	9606.ENSP00000369050	0	0	0.439	0.788	0.063	0	0.9	0.893	0.927
FGF2	FGF23	4435443	4433694	9606.ENSP00000264498	9606.ENSP00000237837	0	0	0	0.597	0	0	0.9	0.693	0.927
SPP1	PDGFB	4446370	4440178	9606.ENSP00000378517	9606.ENSP00000330382	0	0	0	0	0.069	0	0.9	0.287	0.927
PRLR	ERBB4	4451730	4441238	9606.ENSP00000482954	9606.ENSP00000342235	0	0	0	0	0	0	0.9	0.304	0.927
STAT5A	STAT2	4441128	4439022	9606.ENSP00000341208	9606.ENSP00000315768	0	0	0	0.642	0.061	0	0.9	0.735	0.927
CDK2	CDK4	4435732	4434582	9606.ENSP00000266970	9606.ENSP00000257904	0	0	0.446	0.911	0.119	0.126	0.9	0.952	0.926
FYN	PRKACA	4441647	4438521	9606.ENSP00000346671	9606.ENSP00000309591	0	0	0.243	0.595	0.063	0.186	0.9	0.099	0.926
MAP2K4	FADD	4448551	4437802	9606.ENSP00000410402	9606.ENSP00000301838	0	0	0	0	0	0	0.9	0.297	0.926
CX3CR1	CCL2	4442101	4433339	9606.ENSP00000351059	9606.ENSP00000225831	0	0	0	0	0	0	0.6	0.824	0.926
ADORA3	CX3CR1	4443373	4442101	9606.ENSP00000358730	9606.ENSP00000351059	0	0	0	0	0.141	0	0.9	0.217	0.926
JUN	TGFB2	4443699	4442765	9606.ENSP00000360266	9606.ENSP00000355896	0	0	0	0	0	0	0.9	0.295	0.926
MYC	RXRA	4451407	4449061	9606.ENSP00000479618	9606.ENSP00000419692	0	0	0	0	0	0	0.9	0.299	0.926
LYZ	PRTN3	4434847	4433625	9606.ENSP00000261267	9606.ENSP00000234347	0	0	0	0	0.076	0	0.9	0.268	0.926
AR	PTEN	4444436	4443848	9606.ENSP00000363822	9606.ENSP00000361021	0	0	0	0	0	0.393	0	0.882	0.926
ICAM1	IL1B	4435501	4435241	9606.ENSP00000264832	9606.ENSP00000263341	0	0	0	0	0.154	0	0	0.916	0.926
MAPK8	IGFBP3	4446429	4445494	9606.ENSP00000378974	9606.ENSP00000370473	0	0	0	0	0	0	0.9	0.292	0.926
PTGER3	CXCL8	4441881	4438229	9606.ENSP00000349003	9606.ENSP00000306512	0	0	0	0	0	0	0.9	0.294	0.926
STAT1	GSK3B	4442456	4439717	9606.ENSP00000354394	9606.ENSP00000324806	0	0	0	0	0.062	0.124	0.9	0.209	0.926
OPRM1	CXCL8	4447859	4438229	9606.ENSP00000394624	9606.ENSP00000306512	0	0	0	0	0	0	0.9	0.293	0.926
TNF	PTGS2	4448041	4442894	9606.ENSP00000398698	9606.ENSP00000356438	0	0	0	0	0.096	0	0	0.921	0.926
FGFR2	MAPK1	4448546	4432880	9606.ENSP00000410294	9606.ENSP00000215832	0	0	0	0.578	0	0.084	0.9	0.568	0.926
ADORA3	DRD2	4443373	4442557	9606.ENSP00000358730	9606.ENSP00000354859	0	0	0	0.58	0	0	0.9	0.643	0.926
F2	OXT	4438421	4433016	9606.ENSP00000308541	9606.ENSP00000217386	0	0	0	0	0	0	0.9	0.296	0.926
CAV1	GSK3B	4440933	4439717	9606.ENSP00000339191	9606.ENSP00000324806	0	0	0	0	0	0.057	0.9	0.282	0.926
TOMM40	SLC25A4	4448548	4436430	9606.ENSP00000410339	9606.ENSP00000281456	0	0	0	0	0.154	0	0.9	0.194	0.925
ESR1	NR3C1	4448358	4433539	9606.ENSP00000405330	9606.ENSP00000231509	0	0	0	0.66	0	0	0.9	0.751	0.925
STAT2	STAT5B	4439022	4437006	9606.ENSP00000315768	9606.ENSP00000293328	0	0	0	0.649	0.061	0	0.9	0.691	0.925
TH	AKR1B1	4445511	4436650	9606.ENSP00000370571	9606.ENSP00000285930	0	0	0	0	0.062	0	0.9	0.266	0.925
FGFR2	FOS	4448546	4438204	9606.ENSP00000410294	9606.ENSP00000306245	0	0	0	0	0	0	0.9	0.287	0.925
PTGER3	ADRA2A	4441881	4436361	9606.ENSP00000349003	9606.ENSP00000280155	0	0	0	0	0.07	0	0.9	0.261	0.925
DHFR	TH	4447922	4445511	9606.ENSP00000396308	9606.ENSP00000370571	0	0	0	0	0	0	0.9	0.282	0.925
IGF2	MMP1	4447717	4439553	9606.ENSP00000391826	9606.ENSP00000322788	0	0	0	0	0.076	0	0.9	0.257	0.925
ESR1	BCL2	4448358	4446777	9606.ENSP00000405330	9606.ENSP00000381185	0	0	0	0	0.069	0.064	0.9	0.244	0.925
GSK3B	CDK4	4439717	4434582	9606.ENSP00000324806	9606.ENSP00000257904	0	0	0.347	0.735	0.063	0.093	0.9	0.462	0.925
TLR4	IL1B	4444300	4435241	9606.ENSP00000363089	9606.ENSP00000263341	0	0	0	0	0.16	0	0	0.913	0.925
RXRA	ACADM	4449061	4443625	9606.ENSP00000419692	9606.ENSP00000359871	0	0	0	0	0.061	0	0.9	0.268	0.925
CXCL8	C5	4438229	4433289	9606.ENSP00000306512	9606.ENSP00000223642	0	0	0	0	0	0	0.9	0.283	0.925
MAOB	CYP3A4	4444997	4440831	9606.ENSP00000367309	9606.ENSP00000337915	0	0	0	0	0.063	0	0.9	0.267	0.925
FYN	GSK3B	4441647	4439717	9606.ENSP00000346671	9606.ENSP00000324806	0	0	0	0.562	0	0.123	0.9	0.426	0.924
TRPV1	PRKCE	4450642	4438196	9606.ENSP00000461007	9606.ENSP00000306124	0	0	0	0	0	0	0.8	0.64	0.924
TNFSF11	CD40LG	4446858	4443586	9606.ENSP00000381775	9606.ENSP00000359663	0	0	0	0.592	0.063	0	0.9	0.587	0.924
POLA1	E2F1	4445155	4441534	9606.ENSP00000368349	9606.ENSP00000345571	0	0	0	0	0.191	0	0.9	0.134	0.923
TERT	IRF1	4438520	4433930	9606.ENSP00000309572	9606.ENSP00000245414	0	0	0	0	0	0	0.9	0.264	0.923
AVP	DRD5	4445364	4438197	9606.ENSP00000369647	9606.ENSP00000306129	0	0	0	0	0.061	0	0.9	0.25	0.923
RXRA	LEP	4449061	4438805	9606.ENSP00000419692	9606.ENSP00000312652	0	0	0	0	0	0	0.9	0.265	0.923
IGF2	F2	4447717	4438421	9606.ENSP00000391826	9606.ENSP00000308541	0	0	0	0	0.169	0	0.9	0.149	0.923
ADORA1	ADRA2A	4442839	4436361	9606.ENSP00000356205	9606.ENSP00000280155	0	0	0	0.637	0.075	0	0.9	0.581	0.923
PRKCB	EGF	4438120	4435570	9606.ENSP00000305355	9606.ENSP00000265171	0	0	0	0	0	0	0.9	0.266	0.923
TGFB2	PLG	4442765	4438461	9606.ENSP00000355896	9606.ENSP00000308938	0	0	0	0	0	0	0.9	0.269	0.923
EDN1	OXTR	4445200	4439675	9606.ENSP00000368683	9606.ENSP00000324270	0	0	0	0	0	0.157	0.9	0.168	0.923
AVP	EDN2	4445364	4443976	9606.ENSP00000369647	9606.ENSP00000361668	0	0	0	0	0	0	0.9	0.27	0.923
TGFB2	FOS	4442765	4438204	9606.ENSP00000355896	9606.ENSP00000306245	0	0	0	0	0	0	0.9	0.262	0.923
RXRA	MAPK8	4449061	4446429	9606.ENSP00000419692	9606.ENSP00000378974	0	0	0	0	0	0	0.9	0.262	0.923
MMP3	MMP2	4437610	4433061	9606.ENSP00000299855	9606.ENSP00000219070	0	0	0	0.88	0.181	0	0.9	0.892	0.923
LCN2	CTSD	4444080	4433665	9606.ENSP00000362108	9606.ENSP00000236671	0	0	0	0	0	0	0.9	0.267	0.923
IL6	MMP9	4447254	4443919	9606.ENSP00000385675	9606.ENSP00000361405	0	0	0	0	0.074	0	0	0.92	0.923
DRD2	SSTR2	4442557	4442018	9606.ENSP00000354859	9606.ENSP00000350198	0	0	0	0.608	0.062	0	0.9	0.571	0.923
ARRB1	WNT5A	4448521	4435460	9606.ENSP00000409581	9606.ENSP00000264634	0	0	0	0	0.062	0	0.9	0.25	0.923
FAS	HSPB1	4441783	4434059	9606.ENSP00000347979	9606.ENSP00000248553	0	0	0	0	0	0	0.9	0.266	0.923
ARRB1	EDN1	4448521	4445200	9606.ENSP00000409581	9606.ENSP00000368683	0	0	0	0	0	0	0.9	0.269	0.923
MAPK8	MET	4446429	4439114	9606.ENSP00000378974	9606.ENSP00000317272	0	0	0	0.56	0.062	0.073	0.9	0.447	0.923
LCN2	ARG1	4444080	4441926	9606.ENSP00000362108	9606.ENSP00000349446	0	0	0	0	0.061	0	0.9	0.25	0.923
PTAFR	VCAM1	4444275	4437090	9606.ENSP00000362965	9606.ENSP00000294728	0	0	0	0	0.153	0	0.9	0.164	0.923
RXRA	NR3C1	4449061	4433539	9606.ENSP00000419692	9606.ENSP00000231509	0	0	0	0.632	0	0	0.9	0.641	0.923
CYP1A1	CYP2D6	4445265	4442402	9606.ENSP00000369050	9606.ENSP00000353820	0	0	0.41	0.809	0.062	0	0.9	0.837	0.923
DRD2	SSTR1	4442557	4435759	9606.ENSP00000354859	9606.ENSP00000267377	0	0	0	0.587	0.063	0	0.9	0.542	0.923
IGF2	IGF1	4447717	4437883	9606.ENSP00000391826	9606.ENSP00000302665	0	0	0	0.782	0.061	0	0.9	0.965	0.922
TH	MAPK14	4445511	4433482	9606.ENSP00000370571	9606.ENSP00000229795	0	0	0	0	0	0.079	0.9	0.224	0.922
STAT5A	CCNB1	4441128	4434484	9606.ENSP00000341208	9606.ENSP00000256442	0	0	0	0	0	0	0.9	0.256	0.922
UHRF1	TOP2A	4451406	4448614	9606.ENSP00000479617	9606.ENSP00000411532	0.045	0	0	0	0.773	0.457	0	0.42	0.922
RXRA	CYP1A1	4449061	4445265	9606.ENSP00000419692	9606.ENSP00000369050	0	0	0	0	0.051	0.085	0.9	0.212	0.922
FGFR2	STAT1	4448546	4442456	9606.ENSP00000410294	9606.ENSP00000354394	0	0	0	0	0	0.096	0.9	0.212	0.922
MMP1	MMP2	4439553	4433061	9606.ENSP00000322788	9606.ENSP00000219070	0	0	0	0.869	0.154	0	0.9	0.921	0.922
CYP2E1	PTGS1	4449959	4442503	9606.ENSP00000440689	9606.ENSP00000354612	0	0	0	0	0.055	0	0.9	0.249	0.922
EPAS1	NR3C1	4435307	4433539	9606.ENSP00000263734	9606.ENSP00000231509	0	0	0	0	0.07	0.095	0.9	0.187	0.922
IGF1	FGF2	4437883	4435443	9606.ENSP00000302665	9606.ENSP00000264498	0	0	0	0	0	0	0	0.921	0.922
MAPK9	NR3C1	4447857	4433539	9606.ENSP00000394560	9606.ENSP00000231509	0	0	0	0	0.062	0	0.9	0.243	0.922
PPARA	NOS2	4447242	4439909	9606.ENSP00000385523	9606.ENSP00000327251	0	0	0	0	0	0.091	0.9	0.211	0.922
INS	CRP	4446661	4434405	9606.ENSP00000380432	9606.ENSP00000255030	0	0	0	0	0.063	0	0	0.921	0.922
TP53	HSPB1	4435880	4434059	9606.ENSP00000269305	9606.ENSP00000248553	0	0	0	0	0	0.705	0	0.746	0.922
FLT1	RASA1	4436489	4436131	9606.ENSP00000282397	9606.ENSP00000274376	0	0	0	0	0	0.184	0.9	0.125	0.922
GSK3B	CDK6	4439717	4435642	9606.ENSP00000324806	9606.ENSP00000265734	0	0	0.304	0.73	0.063	0.093	0.9	0.386	0.922
STAT5B	CCNB1	4437006	4434484	9606.ENSP00000293328	9606.ENSP00000256442	0	0	0	0	0	0	0.9	0.251	0.921
PTPN1	STAT2	4443784	4439022	9606.ENSP00000360683	9606.ENSP00000315768	0	0	0	0	0.064	0.097	0.9	0.18	0.921
MAPK9	CD40LG	4447857	4443586	9606.ENSP00000394560	9606.ENSP00000359663	0	0	0	0	0	0.076	0.9	0.22	0.921
KDR	MAPK14	4435337	4433482	9606.ENSP00000263923	9606.ENSP00000229795	0	0	0	0.579	0	0.084	0.9	0.442	0.921
HTR2A	AVP	4449830	4445364	9606.ENSP00000437737	9606.ENSP00000369647	0	0	0	0	0	0	0.9	0.25	0.921
CSF2	IL4	4437349	4433533	9606.ENSP00000296871	9606.ENSP00000231449	0	0	0	0	0	0	0	0.921	0.921
JUN	STAT3	4443699	4435468	9606.ENSP00000360266	9606.ENSP00000264657	0	0	0	0	0.055	0.476	0	0.852	0.921
RELA	RAF1	4447098	4434195	9606.ENSP00000384273	9606.ENSP00000251849	0	0	0	0	0.112	0	0.9	0.187	0.921
AVP	EGFR	4445364	4436186	9606.ENSP00000369647	9606.ENSP00000275493	0	0	0	0	0.064	0	0.9	0.227	0.921
RELA	TGFB1	4447098	4433189	9606.ENSP00000384273	9606.ENSP00000221930	0	0	0	0	0.083	0	0.9	0.211	0.921
STAT1	PDGFB	4442456	4440178	9606.ENSP00000354394	9606.ENSP00000330382	0	0	0	0	0	0	0.9	0.251	0.921
PTEN	PML	4443848	4435801	9606.ENSP00000361021	9606.ENSP00000268058	0	0	0	0	0	0	0.9	0.25	0.921
PCNA	CCNA2	4445167	4436109	9606.ENSP00000368458	9606.ENSP00000274026	0	0	0	0	0.677	0.539	0	0.517	0.921
ALDH3A1	MAOA	4448623	4441072	9606.ENSP00000411821	9606.ENSP00000340684	0	0	0	0	0.064	0	0.9	0.23	0.921
ADORA1	OPRK1	4442839	4435619	9606.ENSP00000356205	9606.ENSP00000265572	0	0	0	0.607	0.061	0	0.9	0.533	0.921
ADORA1	PTGER3	4442839	4441881	9606.ENSP00000356205	9606.ENSP00000349003	0	0	0	0	0.061	0	0.9	0.227	0.921
GSK3B	PRKACA	4439717	4438521	9606.ENSP00000324806	9606.ENSP00000309591	0	0	0.251	0.625	0.081	0.523	0.8	0.304	0.921
CXCL8	OPRK1	4438229	4435619	9606.ENSP00000306512	9606.ENSP00000265572	0	0	0	0	0	0	0.9	0.25	0.921
COL5A1	PLOD3	4443819	4433268	9606.ENSP00000360882	9606.ENSP00000223127	0	0	0	0	0.095	0.17	0.9	0.079	0.921
IL6	EGFR	4447254	4436186	9606.ENSP00000385675	9606.ENSP00000275493	0	0	0	0	0	0	0.6	0.811	0.921
CDK1	TP53	4446389	4435880	9606.ENSP00000378699	9606.ENSP00000269305	0	0	0	0	0.095	0.395	0	0.867	0.921
IL4	IFNG	4433533	4433446	9606.ENSP00000231449	9606.ENSP00000229135	0	0	0	0	0	0	0	0.921	0.921
PDGFB	FLT1	4440178	4436489	9606.ENSP00000330382	9606.ENSP00000282397	0	0	0	0	0.062	0.393	0.6	0.694	0.921
TLR4	NFKB1	4444300	4433374	9606.ENSP00000363089	9606.ENSP00000226574	0	0	0	0	0.088	0.07	0.8	0.588	0.92
ADRA2A	MTNR1B	4436361	4434528	9606.ENSP00000280155	9606.ENSP00000257068	0	0	0	0.585	0	0	0.9	0.524	0.92
EDN1	RAF1	4445200	4434195	9606.ENSP00000368683	9606.ENSP00000251849	0	0	0	0	0	0	0.9	0.236	0.92
ADCYAP1	DRD5	4450674	4438197	9606.ENSP00000462647	9606.ENSP00000306129	0	0	0	0	0.097	0	0.9	0.189	0.92
OPRM1	ADORA1	4447859	4442839	9606.ENSP00000394624	9606.ENSP00000356205	0	0	0	0.609	0	0	0.9	0.543	0.92
FGF23	MAPK1	4433694	4432880	9606.ENSP00000237837	9606.ENSP00000215832	0	0	0	0	0	0	0.9	0.239	0.92
PRKCA	ADRA2A	4448494	4436361	9606.ENSP00000408695	9606.ENSP00000280155	0	0	0	0	0.061	0.056	0.9	0.212	0.92
MAPK9	MAPK14	4447857	4433482	9606.ENSP00000394560	9606.ENSP00000229795	0	0	0.387	0.928	0.064	0.148	0.9	0.749	0.92
ADORA3	ADORA1	4443373	4442839	9606.ENSP00000358730	9606.ENSP00000356205	0	0	0	0.727	0	0	0.9	0.759	0.92
MAP2K4	NFKB1	4448551	4433374	9606.ENSP00000410402	9606.ENSP00000226574	0	0	0	0	0	0.064	0.9	0.218	0.92
CD40LG	PIK3CG	4443586	4442215	9606.ENSP00000359663	9606.ENSP00000352121	0	0	0	0	0.088	0.05	0.9	0.19	0.92
CYP2E1	AKR1B1	4449959	4436650	9606.ENSP00000440689	9606.ENSP00000285930	0	0	0	0	0.061	0	0.9	0.218	0.92
MAPK8	PRKCQ	4446429	4435203	9606.ENSP00000378974	9606.ENSP00000263125	0	0	0	0.595	0	0.157	0.9	0.268	0.92
CHUK	IL1A	4443527	4435240	9606.ENSP00000359424	9606.ENSP00000263339	0	0	0	0	0.061	0	0.9	0.22	0.92
IGFBP3	APOE	4445494	4434227	9606.ENSP00000370473	9606.ENSP00000252486	0	0	0	0	0.061	0	0.9	0.226	0.92
PRKCA	WNT5A	4448494	4435460	9606.ENSP00000408695	9606.ENSP00000264634	0	0	0	0	0	0	0.9	0.235	0.92
ESR1	PCNA	4448358	4445167	9606.ENSP00000405330	9606.ENSP00000368458	0	0	0	0	0.05	0.157	0.9	0.12	0.92
STAT4	STAT5A	4446006	4441128	9606.ENSP00000376134	9606.ENSP00000341208	0	0	0	0.736	0	0	0.9	0.802	0.92
RELA	PRKCD	4447098	4446312	9606.ENSP00000384273	9606.ENSP00000378217	0	0	0	0	0.061	0	0.9	0.22	0.92
LEP	IGF1	4438805	4437883	9606.ENSP00000312652	9606.ENSP00000302665	0	0	0	0	0	0	0	0.919	0.92
MAPK8	PRKCB	4446429	4438120	9606.ENSP00000378974	9606.ENSP00000305355	0	0	0	0.576	0.049	0	0.9	0.478	0.92
CXCL11	IFNG	4438264	4433446	9606.ENSP00000306884	9606.ENSP00000229135	0	0	0	0	0.116	0	0	0.913	0.92
PML	TGFB1	4435801	4433189	9606.ENSP00000268058	9606.ENSP00000221930	0	0	0	0	0.07	0	0.9	0.213	0.92
AKT1	TNFSF11	4450372	4446858	9606.ENSP00000451828	9606.ENSP00000381775	0	0	0	0	0	0.667	0	0.771	0.92
EZR	ADRB2	4442801	4438121	9606.ENSP00000356042	9606.ENSP00000305372	0	0	0	0	0	0	0.9	0.225	0.919
RASA1	DAB2IP	4436131	4434698	9606.ENSP00000274376	9606.ENSP00000259371	0	0	0	0.584	0.049	0	0.9	0.464	0.919
IKBKB	FAS	4449555	4441783	9606.ENSP00000430684	9606.ENSP00000347979	0	0	0	0	0.061	0	0.9	0.212	0.919
RAF1	NFKB1	4434195	4433374	9606.ENSP00000251849	9606.ENSP00000226574	0	0	0	0	0.061	0.125	0.9	0.132	0.919
DRD2	PTGER3	4442557	4441881	9606.ENSP00000354859	9606.ENSP00000349003	0	0	0	0	0	0	0.9	0.23	0.919
AR	PGR	4444436	4439740	9606.ENSP00000363822	9606.ENSP00000325120	0	0	0	0.813	0.069	0	0.9	0.904	0.919
TAT	BHMT	4441813	4436127	9606.ENSP00000348234	9606.ENSP00000274353	0	0	0	0	0.102	0	0.9	0.18	0.919
MYC	PTEN	4451407	4443848	9606.ENSP00000479618	9606.ENSP00000361021	0	0	0	0	0.057	0.345	0	0.88	0.919
PRKCB	IL2	4438120	4433376	9606.ENSP00000305355	9606.ENSP00000226730	0	0	0	0	0	0	0.9	0.227	0.919
MAPK8	RASA1	4446429	4436131	9606.ENSP00000378974	9606.ENSP00000274376	0	0	0	0	0.062	0	0.9	0.213	0.919
BTK	FADD	4451790	4437802	9606.ENSP00000483570	9606.ENSP00000301838	0	0	0	0	0	0.063	0.9	0.209	0.919
VEGFA	INS	4451310	4446661	9606.ENSP00000478570	9606.ENSP00000380432	0	0	0	0	0	0	0	0.918	0.919
PTAFR	F2	4444275	4438421	9606.ENSP00000362965	9606.ENSP00000308541	0	0	0	0	0	0	0.9	0.23	0.919
TNFSF11	SRC	4446858	4444215	9606.ENSP00000381775	9606.ENSP00000362680	0	0	0	0	0	0.667	0	0.769	0.919
GPT	NAGS	4446354	4437012	9606.ENSP00000378408	9606.ENSP00000293404	0.075	0	0	0	0.114	0	0.9	0.133	0.919
PLCG2	TLR4	4451677	4444300	9606.ENSP00000482457	9606.ENSP00000363089	0	0	0	0	0	0.05	0.9	0.222	0.919
NOS1	RYR1	4451263	4442273	9606.ENSP00000477999	9606.ENSP00000352608	0	0	0	0	0.061	0	0.8	0.605	0.919
PTGER3	OPRK1	4441881	4435619	9606.ENSP00000349003	9606.ENSP00000265572	0	0	0	0	0	0	0.9	0.225	0.919
MAP2K4	PRKCD	4448551	4446312	9606.ENSP00000410402	9606.ENSP00000378217	0	0	0	0.581	0	0.191	0.9	0.132	0.919
ACADM	MCCC2	4443625	4441355	9606.ENSP00000359871	9606.ENSP00000343657	0.071	0.001	0	0	0.108	0	0.9	0.147	0.919
LCN2	MMP9	4444080	4443919	9606.ENSP00000362108	9606.ENSP00000361405	0	0	0	0	0.095	0.379	0	0.867	0.919
ARG1	LYZ	4441926	4434847	9606.ENSP00000349446	9606.ENSP00000261267	0	0	0	0	0.08	0	0.9	0.197	0.919
PML	IRF1	4435801	4433930	9606.ENSP00000268058	9606.ENSP00000245414	0	0	0	0	0.088	0	0.9	0.185	0.919
MTR	TAT	4442697	4441813	9606.ENSP00000355536	9606.ENSP00000348234	0	0	0	0	0.062	0	0.9	0.214	0.919
VEGFA	TNF	4451310	4448041	9606.ENSP00000478570	9606.ENSP00000398698	0	0	0	0	0	0	0	0.919	0.919
MYC	NOS2	4451407	4439909	9606.ENSP00000479618	9606.ENSP00000327251	0	0	0	0	0	0	0.9	0.222	0.918
ARRB1	AVP	4448521	4445364	9606.ENSP00000409581	9606.ENSP00000369647	0	0	0	0	0	0	0.9	0.222	0.918
OPRM1	STAT3	4447859	4435468	9606.ENSP00000394624	9606.ENSP00000264657	0	0	0	0	0	0	0.9	0.222	0.918
ADRB2	WNT5A	4438121	4435460	9606.ENSP00000305372	9606.ENSP00000264634	0	0	0	0	0	0	0.9	0.222	0.918
VEGFA	TP53	4451310	4435880	9606.ENSP00000478570	9606.ENSP00000269305	0	0	0	0	0	0	0	0.918	0.918
STAT4	STAT5B	4446006	4437006	9606.ENSP00000376134	9606.ENSP00000293328	0	0	0	0.754	0	0	0.9	0.744	0.918
PRKCA	RELA	4448494	4447098	9606.ENSP00000408695	9606.ENSP00000384273	0	0	0	0	0	0	0.9	0.214	0.918
ARG1	MAPK1	4441926	4432880	9606.ENSP00000349446	9606.ENSP00000215832	0	0	0	0	0	0	0.9	0.216	0.918
PRKCD	IGF1	4446312	4437883	9606.ENSP00000378217	9606.ENSP00000302665	0	0	0	0	0.049	0	0.9	0.211	0.918
RXRA	TNF	4449061	4448041	9606.ENSP00000419692	9606.ENSP00000398698	0	0	0	0	0	0	0.9	0.215	0.918
TERT	IFNG	4438520	4433446	9606.ENSP00000309572	9606.ENSP00000229135	0	0	0	0	0	0	0.9	0.215	0.918
ERBB2	STAT3	4435897	4435468	9606.ENSP00000269571	9606.ENSP00000264657	0	0	0	0	0	0.457	0	0.856	0.918
MAP2K4	FAS	4448551	4441783	9606.ENSP00000410402	9606.ENSP00000347979	0	0	0	0	0	0	0.9	0.216	0.918
ADRA2A	SSTR1	4436361	4435759	9606.ENSP00000280155	9606.ENSP00000267377	0	0	0	0.627	0.096	0	0.9	0.392	0.918
RELA	PRKCB	4447098	4438120	9606.ENSP00000384273	9606.ENSP00000305355	0	0	0	0	0	0	0.9	0.222	0.918
PRTN3	MAPK1	4433625	4432880	9606.ENSP00000234347	9606.ENSP00000215832	0	0	0	0	0	0.053	0.9	0.212	0.918
ARRB1	CXCL8	4448521	4438229	9606.ENSP00000409581	9606.ENSP00000306512	0	0	0	0	0	0	0.9	0.22	0.918
VEGFA	PTGS2	4451310	4442894	9606.ENSP00000478570	9606.ENSP00000356438	0	0	0	0	0.082	0	0	0.914	0.918
CASP8	COL3A1	4442125	4438049	9606.ENSP00000351273	9606.ENSP00000304408	0	0	0	0	0	0	0.9	0.216	0.918
CHUK	FAS	4443527	4441783	9606.ENSP00000359424	9606.ENSP00000347979	0	0	0	0	0	0	0.9	0.217	0.918
HTR2A	EDN2	4449830	4443976	9606.ENSP00000437737	9606.ENSP00000361668	0	0	0	0	0	0.157	0.9	0.109	0.918
IKBKB	MTOR	4449555	4442490	9606.ENSP00000430684	9606.ENSP00000354558	0	0	0	0	0.058	0.882	0	0.316	0.917
LYZ	CTSD	4434847	4433665	9606.ENSP00000261267	9606.ENSP00000236671	0	0	0	0	0.062	0	0.9	0.195	0.917
CXCL8	ADRA2A	4438229	4436361	9606.ENSP00000306512	9606.ENSP00000280155	0	0	0	0	0	0	0.9	0.211	0.917
ADORA3	CXCL10	4443373	4438146	9606.ENSP00000358730	9606.ENSP00000305651	0	0	0	0	0.07	0	0.9	0.187	0.917
EGFR	CCND1	4436186	4433391	9606.ENSP00000275493	9606.ENSP00000227507	0	0	0	0	0.2	0.157	0	0.886	0.917
CDK1	PRKACA	4446389	4438521	9606.ENSP00000378699	9606.ENSP00000309591	0	0	0.402	0.681	0.062	0	0.9	0.182	0.917
ADAM17	SHH	4438549	4437380	9606.ENSP00000309968	9606.ENSP00000297261	0	0	0	0	0	0	0.9	0.211	0.917
TERT	LEF1	4438520	4435569	9606.ENSP00000309572	9606.ENSP00000265165	0	0	0	0	0	0	0.9	0.212	0.917
TERT	NFKB1	4438520	4433374	9606.ENSP00000309572	9606.ENSP00000226574	0	0	0	0	0.061	0	0.9	0.187	0.917
STAT3	LBP	4435468	4433018	9606.ENSP00000264657	9606.ENSP00000217407	0	0	0	0	0	0	0.9	0.205	0.917
TH	TPO	4445511	4439227	9606.ENSP00000370571	9606.ENSP00000318820	0	0	0	0	0.062	0	0.9	0.188	0.917
PLOD3	PLOD1	4433268	4432760	9606.ENSP00000223127	9606.ENSP00000196061	0	0	0	0.964	0.184	0	0.9	0.834	0.917
CALCA	DRD5	4440295	4438197	9606.ENSP00000331746	9606.ENSP00000306129	0	0	0	0	0	0	0.9	0.21	0.917
TNF	INS	4448041	4446661	9606.ENSP00000398698	9606.ENSP00000380432	0	0	0	0	0	0	0	0.916	0.916
INS	SERPINE1	4446661	4433266	9606.ENSP00000380432	9606.ENSP00000223095	0	0	0	0	0	0	0	0.916	0.916
IL6	TNFSF11	4447254	4446858	9606.ENSP00000385675	9606.ENSP00000381775	0	0	0	0	0	0	0	0.916	0.916
F10	F9	4444587	4433043	9606.ENSP00000364709	9606.ENSP00000218099	0	0	0.443	0.917	0.115	0	0.9	0.724	0.916
ADRB1	DRD5	4443292	4438197	9606.ENSP00000358301	9606.ENSP00000306129	0	0	0	0.79	0.059	0	0.9	0.726	0.916
CXCL10	C5	4438146	4433289	9606.ENSP00000305651	9606.ENSP00000223642	0	0	0	0	0.05	0	0.9	0.189	0.916
TOMM40	OTC	4448548	4432619	9606.ENSP00000410339	9606.ENSP00000039007	0	0	0	0	0.064	0	0.9	0.177	0.916
LYZ	NFKB1	4434847	4433374	9606.ENSP00000261267	9606.ENSP00000226574	0	0	0	0	0.056	0	0.9	0.181	0.916
HTR2A	OXTR	4449830	4439675	9606.ENSP00000437737	9606.ENSP00000324270	0	0	0	0.577	0	0	0.9	0.426	0.916
HIF1A	EPAS1	4449842	4435307	9606.ENSP00000437955	9606.ENSP00000263734	0	0	0	0.903	0	0.126	0.9	0.817	0.916
PCCB	MCCC2	4449005	4441355	9606.ENSP00000419027	9606.ENSP00000343657	0	0	0.292	0.742	0.064	0	0.9	0.355	0.916
ADORA3	MTNR1B	4443373	4434528	9606.ENSP00000358730	9606.ENSP00000257068	0	0	0	0	0	0	0.9	0.199	0.916
MMP9	PRSS1	4443919	4438439	9606.ENSP00000361405	9606.ENSP00000308720	0	0	0	0	0	0	0.9	0.2	0.916
HIF1A	MAPK1	4449842	4432880	9606.ENSP00000437955	9606.ENSP00000215832	0	0	0	0	0	0.294	0.8	0.455	0.916
PRKCA	STAT5A	4448494	4441128	9606.ENSP00000408695	9606.ENSP00000341208	0	0	0	0	0	0	0.9	0.185	0.915
MYC	FOS	4451407	4438204	9606.ENSP00000479618	9606.ENSP00000306245	0	0	0	0	0.064	0.442	0	0.851	0.915
SLPI	CTSD	4441219	4433665	9606.ENSP00000342082	9606.ENSP00000236671	0	0	0	0	0.072	0	0.9	0.158	0.915
NOS1	GRIN2B	4451263	4451206	9606.ENSP00000477999	9606.ENSP00000477455	0	0	0	0	0.095	0.181	0.8	0.499	0.915
PTGER3	CXCL10	4441881	4438146	9606.ENSP00000349003	9606.ENSP00000305651	0	0	0	0	0	0	0.9	0.186	0.915
PRKCB	WNT5A	4438120	4435460	9606.ENSP00000305355	9606.ENSP00000264634	0	0	0	0	0	0	0.9	0.187	0.915
CXCL2	C5	4449392	4433289	9606.ENSP00000427279	9606.ENSP00000223642	0	0	0	0	0	0	0.9	0.189	0.915
CASP8	COL1A1	4442125	4433346	9606.ENSP00000351273	9606.ENSP00000225964	0	0	0	0	0	0	0.9	0.185	0.915
MET	ERBB3	4439114	4435741	9606.ENSP00000317272	9606.ENSP00000267101	0	0	0	0.562	0.063	0.418	0.8	0.676	0.915
ESR2	MAPK1	4441379	4432880	9606.ENSP00000343925	9606.ENSP00000215832	0	0	0	0	0	0.399	0.8	0.351	0.915
DRD2	ADRA2A	4442557	4436361	9606.ENSP00000354859	9606.ENSP00000280155	0	0	0	0.821	0.063	0	0.9	0.767	0.915
ADCYAP1	ADRB1	4450674	4443292	9606.ENSP00000462647	9606.ENSP00000358301	0	0	0	0	0	0	0.9	0.189	0.915
EDN1	EZR	4445200	4442801	9606.ENSP00000368683	9606.ENSP00000356042	0	0	0	0	0	0	0.9	0.189	0.915
ALDH3A1	GAD1	4448623	4442087	9606.ENSP00000411821	9606.ENSP00000350928	0	0	0	0	0.064	0.084	0.9	0.134	0.915
PRKCD	IFNG	4446312	4433446	9606.ENSP00000378217	9606.ENSP00000229135	0	0	0	0	0	0	0.9	0.187	0.915
PTGS2	TP53	4442894	4435880	9606.ENSP00000356438	9606.ENSP00000269305	0	0	0	0	0	0.379	0	0.869	0.915
PRKCA	STAT5B	4448494	4437006	9606.ENSP00000408695	9606.ENSP00000293328	0	0	0	0	0	0	0.9	0.189	0.915
LYZ	MAPK1	4434847	4432880	9606.ENSP00000261267	9606.ENSP00000215832	0	0	0	0	0	0	0.9	0.186	0.915
SRC	PRKCB	4444215	4438120	9606.ENSP00000362680	9606.ENSP00000305355	0	0	0	0.572	0	0.073	0.9	0.323	0.915
LCN2	NFKB1	4444080	4433374	9606.ENSP00000362108	9606.ENSP00000226574	0	0	0	0	0	0	0.9	0.185	0.915
APOE	PON1	4434227	4433224	9606.ENSP00000252486	9606.ENSP00000222381	0	0	0	0	0.062	0	0.72	0.7	0.914
CXCL2	RELA	4449392	4447098	9606.ENSP00000427279	9606.ENSP00000384273	0	0	0	0	0.05	0.342	0.8	0.398	0.914
CASP8	CYCS	4442125	4438356	9606.ENSP00000351273	9606.ENSP00000307786	0	0	0	0	0.063	0	0	0.912	0.914
NCF1	MAPK14	4436815	4433482	9606.ENSP00000289473	9606.ENSP00000229795	0	0	0	0	0	0.436	0.65	0.599	0.914
NR3C2	PGR	4442077	4439740	9606.ENSP00000350815	9606.ENSP00000325120	0	0	0	0.809	0.061	0	0.9	0.663	0.914
PDGFB	STAT5B	4440178	4437006	9606.ENSP00000330382	9606.ENSP00000293328	0	0	0	0	0	0	0.9	0.184	0.914
TOMM40	SLC25A13	4448548	4448105	9606.ENSP00000410339	9606.ENSP00000400101	0	0	0	0	0.177	0	0.9	0.048	0.914
INS	NOS3	4446661	4437409	9606.ENSP00000380432	9606.ENSP00000297494	0	0	0	0	0	0	0	0.914	0.914
CD40LG	IL4	4443586	4433533	9606.ENSP00000359663	9606.ENSP00000231449	0	0	0	0	0	0	0	0.914	0.914
VEGFA	CCL2	4451310	4433339	9606.ENSP00000478570	9606.ENSP00000225831	0	0	0	0	0	0	0	0.914	0.914
SRC	PRKCQ	4444215	4435203	9606.ENSP00000362680	9606.ENSP00000263125	0	0	0	0.578	0.062	0.084	0.9	0.222	0.914
EZR	F2	4442801	4438421	9606.ENSP00000356042	9606.ENSP00000308541	0	0	0	0	0	0	0.9	0.181	0.914
DRD2	MTNR1B	4442557	4434528	9606.ENSP00000354859	9606.ENSP00000257068	0	0	0	0.609	0	0	0.9	0.397	0.914
TPO	TYR	4439227	4435237	9606.ENSP00000318820	9606.ENSP00000263321	0	0	0	0	0.061	0	0.9	0.167	0.914
TAT	TYR	4441813	4435237	9606.ENSP00000348234	9606.ENSP00000263321	0	0	0	0	0.05	0	0.9	0.168	0.914
PRKCB	RASA1	4438120	4436131	9606.ENSP00000305355	9606.ENSP00000274376	0	0	0	0	0.052	0.131	0.9	0.088	0.914
STAT5A	PDGFB	4441128	4440178	9606.ENSP00000341208	9606.ENSP00000330382	0	0	0	0	0	0	0.9	0.176	0.914
UHRF1	CCNA2	4451406	4436109	9606.ENSP00000479617	9606.ENSP00000274026	0	0	0	0	0.877	0	0	0.33	0.914
CSF2	CCL2	4437349	4433339	9606.ENSP00000296871	9606.ENSP00000225831	0	0	0	0	0.063	0	0	0.91	0.913
CHUK	PRKCE	4443527	4438196	9606.ENSP00000359424	9606.ENSP00000306124	0	0	0	0.557	0.062	0.071	0.9	0.231	0.913
MMP9	IL1B	4443919	4435241	9606.ENSP00000361405	9606.ENSP00000263341	0	0	0	0	0.2	0	0	0.895	0.913
ARG1	IL4	4441926	4433533	9606.ENSP00000349446	9606.ENSP00000231449	0	0	0	0	0	0	0	0.912	0.913
F3	PLG	4440531	4438461	9606.ENSP00000334145	9606.ENSP00000308938	0	0	0	0	0	0.379	0	0.866	0.913
DRD2	CXCL8	4442557	4438229	9606.ENSP00000354859	9606.ENSP00000306512	0	0	0	0	0	0	0.9	0.167	0.913
SSTR2	ADRA2A	4442018	4436361	9606.ENSP00000350198	9606.ENSP00000280155	0	0	0	0.617	0.055	0	0.9	0.347	0.913
CXCL2	ADORA3	4449392	4443373	9606.ENSP00000427279	9606.ENSP00000358730	0	0	0	0	0	0	0.9	0.167	0.913
PRKCB	STAT5B	4438120	4437006	9606.ENSP00000305355	9606.ENSP00000293328	0	0	0	0	0.069	0	0.9	0.14	0.913
ADCYAP1	ADRB2	4450674	4438121	9606.ENSP00000462647	9606.ENSP00000305372	0	0	0	0	0	0	0.9	0.166	0.913
ADORA3	PTGER3	4443373	4441881	9606.ENSP00000358730	9606.ENSP00000349003	0	0	0	0	0	0	0.9	0.173	0.913
CYP2E1	ALOX5	4449959	4444382	9606.ENSP00000440689	9606.ENSP00000363512	0	0	0	0	0	0	0.9	0.169	0.913
DRD5	ADRB2	4438197	4438121	9606.ENSP00000306129	9606.ENSP00000305372	0	0	0	0.802	0	0	0.9	0.709	0.913
AKT1	JUN	4450372	4443699	9606.ENSP00000451828	9606.ENSP00000360266	0	0	0	0	0	0.072	0	0.91	0.913
ADORA1	CXCL10	4442839	4438146	9606.ENSP00000356205	9606.ENSP00000305651	0	0	0	0	0	0	0.9	0.167	0.913
ADORA1	CX3CR1	4442839	4442101	9606.ENSP00000356205	9606.ENSP00000351059	0	0	0	0	0	0	0.9	0.17	0.913
STAT5A	PRKCB	4441128	4438120	9606.ENSP00000341208	9606.ENSP00000305355	0	0	0	0	0.077	0	0.9	0.123	0.912
EZR	PRKCQ	4442801	4435203	9606.ENSP00000356042	9606.ENSP00000263125	0	0	0	0	0	0	0.9	0.158	0.912
ALDH3A1	MAOB	4448623	4444997	9606.ENSP00000411821	9606.ENSP00000367309	0	0	0	0	0	0	0.9	0.16	0.912
ALOX15	ALOX5	4450608	4444382	9606.ENSP00000458832	9606.ENSP00000363512	0	0	0.298	0.905	0.062	0	0.9	0.891	0.912
EDN2	OXTR	4443976	4439675	9606.ENSP00000361668	9606.ENSP00000324270	0	0	0	0	0	0.157	0.9	0	0.912
PDGFB	FLT4	4440178	4434983	9606.ENSP00000330382	9606.ENSP00000261937	0	0	0	0	0.061	0.393	0.6	0.66	0.912
APOE	FGF23	4434227	4433694	9606.ENSP00000252486	9606.ENSP00000237837	0	0	0	0	0	0	0.9	0.164	0.912
PRKCD	RASA1	4446312	4436131	9606.ENSP00000378217	9606.ENSP00000274376	0	0	0	0	0.063	0.103	0.9	0.079	0.912
CASP1	TLR4	4449658	4444300	9606.ENSP00000433138	9606.ENSP00000363089	0	0	0	0	0.23	0.08	0	0.886	0.912
PGR	NR3C1	4439740	4433539	9606.ENSP00000325120	9606.ENSP00000231509	0	0	0	0.839	0	0	0.9	0.78	0.912
ALOX5	ALOX12	4444382	4434179	9606.ENSP00000363512	9606.ENSP00000251535	0	0	0.386	0.911	0.063	0	0.9	0.863	0.912
PRKCB	RAF1	4438120	4434195	9606.ENSP00000305355	9606.ENSP00000251849	0	0	0	0.569	0	0.073	0.9	0.249	0.912
SLC25A13	SLC25A4	4448105	4436430	9606.ENSP00000400101	9606.ENSP00000281456	0	0	0	0.718	0.055	0	0.9	0.4	0.911
PRKCA	MMP3	4448494	4437610	9606.ENSP00000408695	9606.ENSP00000299855	0	0	0	0	0	0	0.9	0.152	0.911
ARRB1	CXCL10	4448521	4438146	9606.ENSP00000409581	9606.ENSP00000305651	0	0	0	0	0	0	0.9	0.147	0.911
OPRM1	SSTR2	4447859	4442018	9606.ENSP00000394624	9606.ENSP00000350198	0	0	0	0.875	0.069	0	0.9	0.71	0.911
NOS1	GRIN1	4451263	4443769	9606.ENSP00000477999	9606.ENSP00000360608	0	0	0	0	0.062	0.185	0.8	0.485	0.91
TNNI3	PRKACA	4441191	4438521	9606.ENSP00000341838	9606.ENSP00000309591	0	0	0	0	0.063	0	0.9	0.118	0.91
SSTR2	OPRK1	4442018	4435619	9606.ENSP00000350198	9606.ENSP00000265572	0	0	0	0.866	0.086	0	0.9	0.473	0.91
NOS1	PRKCB	4451263	4438120	9606.ENSP00000477999	9606.ENSP00000305355	0	0	0	0	0.061	0	0.9	0.122	0.91
PRKCE	ADRA2A	4438196	4436361	9606.ENSP00000306124	9606.ENSP00000280155	0	0	0	0	0	0	0.9	0.145	0.91
TNFSF11	MAPK1	4446858	4432880	9606.ENSP00000381775	9606.ENSP00000215832	0	0	0	0	0	0.667	0	0.743	0.91
CYP2E1	ALOX12	4449959	4434179	9606.ENSP00000440689	9606.ENSP00000251535	0	0	0	0	0	0	0.9	0.138	0.91
TNF	MAPK8	4448041	4446429	9606.ENSP00000398698	9606.ENSP00000378974	0	0	0	0	0	0	0	0.91	0.91
PTGER3	SSTR1	4441881	4435759	9606.ENSP00000349003	9606.ENSP00000267377	0	0	0	0	0	0	0.9	0.141	0.91
F2	ADRB2	4438421	4438121	9606.ENSP00000308541	9606.ENSP00000305372	0	0	0	0	0	0	0.9	0.143	0.91
FYN	PDGFB	4441647	4440178	9606.ENSP00000346671	9606.ENSP00000330382	0	0	0	0	0	0	0.9	0.146	0.91
PARP1	POLE	4442743	4439536	9606.ENSP00000355759	9606.ENSP00000322570	0	0	0	0	0.065	0	0.9	0.118	0.91
ARG1	PRTN3	4441926	4433625	9606.ENSP00000349446	9606.ENSP00000234347	0	0	0	0	0.076	0	0.9	0.107	0.91
B4GALT1	GAA	4445266	4438152	9606.ENSP00000369055	9606.ENSP00000305692	0	0	0	0	0	0.141	0.9	0	0.91
CXCL2	ADORA1	4449392	4442839	9606.ENSP00000427279	9606.ENSP00000356205	0	0	0	0	0	0	0.9	0.146	0.91
PRKCB	PRKCQ	4438120	4435203	9606.ENSP00000305355	9606.ENSP00000263125	0	0	0	0.891	0.09	0	0.9	0.513	0.91
PRKCA	RASA1	4448494	4436131	9606.ENSP00000408695	9606.ENSP00000274376	0	0	0	0	0.052	0.131	0.9	0	0.91
EDN1	PTAFR	4445200	4444275	9606.ENSP00000368683	9606.ENSP00000362965	0	0	0	0	0	0	0.9	0.14	0.91
OPRM1	CXCL10	4447859	4438146	9606.ENSP00000394624	9606.ENSP00000305651	0	0	0	0	0	0	0.9	0.14	0.91
STAT1	ERBB2	4442456	4435897	9606.ENSP00000354394	9606.ENSP00000269571	0	0	0	0	0.061	0.696	0	0.711	0.91
HPSE	LYZ	4447096	4434847	9606.ENSP00000384262	9606.ENSP00000261267	0	0	0	0	0.061	0	0.9	0.121	0.91
ALOX15	CYP2E1	4450608	4449959	9606.ENSP00000458832	9606.ENSP00000440689	0	0	0	0	0	0	0.9	0.138	0.91
FLT1	FGF2	4436489	4435443	9606.ENSP00000282397	9606.ENSP00000264498	0	0	0	0	0.063	0.267	0.6	0.708	0.909
PPARA	RB1	4447242	4435747	9606.ENSP00000385523	9606.ENSP00000267163	0	0	0	0	0	0.055	0.9	0.123	0.909
MMP1	PRSS1	4439553	4438439	9606.ENSP00000322788	9606.ENSP00000308720	0	0	0	0	0.066	0	0.9	0.105	0.909
ARG1	NFKB1	4441926	4433374	9606.ENSP00000349446	9606.ENSP00000226574	0	0	0	0	0	0	0.9	0.135	0.909
SOD2	STAT4	4450194	4446006	9606.ENSP00000446252	9606.ENSP00000376134	0	0	0	0	0.062	0	0.9	0.113	0.909
ADORA1	SSTR1	4442839	4435759	9606.ENSP00000356205	9606.ENSP00000267377	0	0	0	0.624	0.091	0	0.9	0.164	0.909
STAT4	STAT2	4446006	4439022	9606.ENSP00000376134	9606.ENSP00000315768	0	0	0	0.88	0	0	0.9	0.77	0.909
FOXP3	STAT3	4444690	4435468	9606.ENSP00000365380	9606.ENSP00000264657	0	0	0	0	0	0.4	0	0.854	0.909
PRKCA	ERBB4	4448494	4441238	9606.ENSP00000408695	9606.ENSP00000342235	0	0	0	0.559	0.049	0.064	0.9	0.175	0.909
RXRA	NOS2	4449061	4439909	9606.ENSP00000419692	9606.ENSP00000327251	0	0	0	0	0	0.091	0.9	0.087	0.909
CXCL8	CRP	4438229	4434405	9606.ENSP00000306512	9606.ENSP00000255030	0	0	0	0	0	0	0	0.909	0.909
AKT1	NOS2	4450372	4439909	9606.ENSP00000451828	9606.ENSP00000327251	0	0	0	0	0.063	0.065	0.8	0.543	0.909
PRKCB	NCF1	4438120	4436815	9606.ENSP00000305355	9606.ENSP00000289473	0	0	0	0	0.088	0.379	0.8	0.297	0.909
MYC	CDK4	4451407	4434582	9606.ENSP00000479618	9606.ENSP00000257904	0	0	0	0	0.106	0.378	0	0.849	0.909
PPARA	F2	4447242	4438421	9606.ENSP00000385523	9606.ENSP00000308541	0	0	0	0	0.063	0	0.9	0.106	0.908
CHUK	CD14	4443527	4438033	9606.ENSP00000359424	9606.ENSP00000304236	0	0	0	0	0.061	0	0.9	0.103	0.908
SSTR2	SSTR1	4442018	4435759	9606.ENSP00000350198	9606.ENSP00000267377	0	0	0	0.93	0.064	0	0.9	0.892	0.908
ESR1	MAPK8	4448358	4446429	9606.ENSP00000405330	9606.ENSP00000378974	0	0	0	0	0	0	0.8	0.559	0.908
MMP9	MMP2	4443919	4433061	9606.ENSP00000361405	9606.ENSP00000219070	0	0	0	0.929	0.061	0	0.9	0.958	0.908
GSTP1	CYP1A1	4446837	4445265	9606.ENSP00000381607	9606.ENSP00000369050	0	0	0	0	0	0.077	0.65	0.738	0.908
F2	RAF1	4438421	4434195	9606.ENSP00000308541	9606.ENSP00000251849	0	0	0	0	0	0.05	0.9	0.116	0.908
PLCG2	KDR	4451677	4435337	9606.ENSP00000482457	9606.ENSP00000263923	0	0	0	0	0	0.539	0.8	0.082	0.908
FLT4	COL1A1	4434983	4433346	9606.ENSP00000261937	9606.ENSP00000225964	0	0	0	0	0	0.085	0.9	0.083	0.908
PRKCE	IL2	4438196	4433376	9606.ENSP00000306124	9606.ENSP00000226730	0	0	0	0	0	0	0.9	0.125	0.908
HTR2A	F2	4449830	4438421	9606.ENSP00000437737	9606.ENSP00000308541	0	0	0	0	0	0	0.9	0.125	0.908
CXCL8	MTNR1B	4438229	4434528	9606.ENSP00000306512	9606.ENSP00000257068	0	0	0	0	0	0	0.9	0.122	0.908
CTSD	NFKB1	4433665	4433374	9606.ENSP00000236671	9606.ENSP00000226574	0	0	0	0	0.055	0	0.9	0.108	0.908
RXRA	PRKCA	4449061	4448494	9606.ENSP00000419692	9606.ENSP00000408695	0	0	0	0	0	0	0.9	0.123	0.908
EPRS	GLUL	4442762	4438369	9606.ENSP00000355890	9606.ENSP00000307900	0.207	0	0	0	0.109	0.267	0.8	0.251	0.908
IGFBP3	FGF23	4445494	4433694	9606.ENSP00000370473	9606.ENSP00000237837	0	0	0	0	0	0	0.9	0.111	0.907
PRKCA	RET	4448494	4441779	9606.ENSP00000408695	9606.ENSP00000347942	0	0	0	0.551	0	0	0.9	0.21	0.907
NFE2L2	PRKCB	4446632	4438120	9606.ENSP00000380252	9606.ENSP00000305355	0	0	0	0	0	0	0.9	0.111	0.907
PRKCA	PRKCD	4448494	4446312	9606.ENSP00000408695	9606.ENSP00000378217	0	0	0	0.891	0	0	0.9	0.731	0.907
IGF2	CCND1	4447717	4433391	9606.ENSP00000391826	9606.ENSP00000227507	0	0	0	0	0.092	0	0	0.901	0.907
ADORA1	MTNR1B	4442839	4434528	9606.ENSP00000356205	9606.ENSP00000257068	0	0	0	0.614	0	0	0.9	0.23	0.907
TYMS	CCNA2	4439011	4436109	9606.ENSP00000315644	9606.ENSP00000274026	0	0	0	0	0.838	0	0	0.447	0.907
OPRK1	MTNR1B	4435619	4434528	9606.ENSP00000265572	9606.ENSP00000257068	0	0	0	0.662	0	0	0.9	0.267	0.907
PML	ICAM1	4435801	4435501	9606.ENSP00000268058	9606.ENSP00000264832	0	0	0	0	0.076	0	0.9	0.081	0.907
HTR2A	SLC6A4	4449830	4434929	9606.ENSP00000437737	9606.ENSP00000261707	0	0	0	0	0	0.073	0	0.904	0.907
ARG1	CTSD	4441926	4433665	9606.ENSP00000349446	9606.ENSP00000236671	0	0	0	0	0.062	0	0.9	0.096	0.907
SSTR1	OPRK1	4435759	4435619	9606.ENSP00000267377	9606.ENSP00000265572	0	0	0	0.878	0.062	0	0.9	0.474	0.907
RB1	COL1A1	4435747	4433346	9606.ENSP00000267163	9606.ENSP00000225964	0	0	0	0	0.063	0	0.9	0.094	0.907
PTAFR	IRF1	4444275	4433930	9606.ENSP00000362965	9606.ENSP00000245414	0	0	0	0	0.111	0	0.9	0.046	0.907
OPRM1	MTNR1B	4447859	4434528	9606.ENSP00000394624	9606.ENSP00000257068	0	0	0	0.658	0	0	0.9	0.26	0.907
MAPT	APOE	4441081	4434227	9606.ENSP00000340820	9606.ENSP00000252486	0	0	0	0	0	0.379	0	0.855	0.907
HPSE	CTSD	4447096	4433665	9606.ENSP00000384262	9606.ENSP00000236671	0	0	0	0	0	0	0.9	0.112	0.907
RET	NKX2-1	4441779	4441663	9606.ENSP00000347942	9606.ENSP00000346879	0	0	0	0	0.055	0.085	0	0.901	0.907
EDN2	F2	4443976	4438421	9606.ENSP00000361668	9606.ENSP00000308541	0	0	0	0	0	0	0.9	0.116	0.907
PTPN1	PDGFB	4443784	4440178	9606.ENSP00000360683	9606.ENSP00000330382	0	0	0	0	0	0	0.9	0.114	0.907
HTR2A	PTAFR	4449830	4444275	9606.ENSP00000437737	9606.ENSP00000362965	0	0	0	0	0.062	0	0.9	0.095	0.907
ELANE	NFKB1	4450799	4433374	9606.ENSP00000466090	9606.ENSP00000226574	0	0	0	0	0	0.054	0.9	0.105	0.907
CDK1	PRKCE	4446389	4438196	9606.ENSP00000378699	9606.ENSP00000306124	0	0	0	0.669	0.048	0.079	0.9	0.138	0.907
HMGCL	NOS2	4444400	4439909	9606.ENSP00000363614	9606.ENSP00000327251	0.042	0	0	0	0.085	0	0.9	0.067	0.907
PTPN1	IFNG	4443784	4433446	9606.ENSP00000360683	9606.ENSP00000229135	0	0	0	0	0	0	0.9	0.112	0.907
ADORA1	SSTR2	4442839	4442018	9606.ENSP00000356205	9606.ENSP00000350198	0	0	0	0.608	0.061	0	0.9	0.173	0.907
PTGER3	CXCL11	4441881	4438264	9606.ENSP00000349003	9606.ENSP00000306884	0	0	0	0	0	0	0.9	0.116	0.907
XDH	CYP1A2	4445208	4441211	9606.ENSP00000368727	9606.ENSP00000342007	0	0	0	0	0.061	0	0.9	0.096	0.907
PTAFR	OXTR	4444275	4439675	9606.ENSP00000362965	9606.ENSP00000324270	0	0	0	0	0	0	0.9	0.117	0.907
MAOA	IL4	4441072	4433533	9606.ENSP00000340684	9606.ENSP00000231449	0	0	0	0	0	0	0.9	0.116	0.907
ARG1	SLPI	4441926	4441219	9606.ENSP00000349446	9606.ENSP00000342082	0	0	0	0	0.061	0	0.9	0.081	0.906
EDN1	HCRT	4445200	4437007	9606.ENSP00000368683	9606.ENSP00000293330	0	0	0	0	0	0	0.9	0.099	0.906
COL5A1	CASP8	4443819	4442125	9606.ENSP00000360882	9606.ENSP00000351273	0	0	0	0	0	0	0.9	0.106	0.906
ADORA3	SSTR2	4443373	4442018	9606.ENSP00000358730	9606.ENSP00000350198	0	0	0	0	0	0	0.9	0.105	0.906
PRKCE	PRKCB	4438196	4438120	9606.ENSP00000306124	9606.ENSP00000305355	0	0	0	0.922	0.055	0	0.9	0.617	0.906
CXCL10	OPRK1	4438146	4435619	9606.ENSP00000305651	9606.ENSP00000265572	0	0	0	0	0	0	0.9	0.105	0.906
CXCL2	IL1B	4449392	4435241	9606.ENSP00000427279	9606.ENSP00000263341	0	0	0	0	0.592	0	0	0.781	0.906
ADORA3	SSTR1	4443373	4435759	9606.ENSP00000358730	9606.ENSP00000267377	0	0	0	0	0	0	0.9	0.106	0.906
MAPK8	STAT3	4446429	4435468	9606.ENSP00000378974	9606.ENSP00000264657	0	0	0	0	0	0.379	0	0.854	0.906
PRKCD	PRKCE	4446312	4438196	9606.ENSP00000378217	9606.ENSP00000306124	0	0	0	0.919	0	0	0.9	0.779	0.906
VDR	GC	4450226	4449184	9606.ENSP00000447173	9606.ENSP00000421725	0	0	0	0	0.062	0.057	0	0.902	0.906
OPRM1	SSTR1	4447859	4435759	9606.ENSP00000394624	9606.ENSP00000267377	0	0	0	0.877	0	0	0.9	0.519	0.906
CDKN2A	PTEN	4448997	4443848	9606.ENSP00000418915	9606.ENSP00000361021	0	0	0	0	0.062	0.23	0	0.88	0.906
CASP1	FGF2	4449658	4435443	9606.ENSP00000433138	9606.ENSP00000264498	0	0	0	0	0	0.379	0	0.856	0.906
ABCC2	ABCG2	4443534	4433689	9606.ENSP00000359478	9606.ENSP00000237612	0	0	0	0	0.062	0.091	0	0.899	0.906
MAP2K4	CD40LG	4448551	4443586	9606.ENSP00000410402	9606.ENSP00000359663	0	0	0	0	0	0	0.9	0.104	0.906
AR	PRKACA	4444436	4438521	9606.ENSP00000363822	9606.ENSP00000309591	0	0	0	0	0	0	0.9	0.105	0.906
CXCL8	CSF2	4438229	4437349	9606.ENSP00000306512	9606.ENSP00000296871	0	0	0	0	0.148	0	0	0.895	0.906
PTGS2	NOS2	4442894	4439909	9606.ENSP00000356438	9606.ENSP00000327251	0	0	0	0	0.063	0.299	0	0.868	0.906
ERBB4	PRKCB	4441238	4438120	9606.ENSP00000342235	9606.ENSP00000305355	0	0	0	0.553	0.049	0.064	0.9	0.107	0.906
SMOX	ALDH2	4451286	4434937	9606.ENSP00000478305	9606.ENSP00000261733	0	0	0	0	0	0	0.9	0.105	0.906
OPRM1	OPRK1	4447859	4435619	9606.ENSP00000394624	9606.ENSP00000265572	0	0	0	0.957	0.061	0	0.9	0.849	0.905
EDN2	OXT	4443976	4433016	9606.ENSP00000361668	9606.ENSP00000217386	0	0	0	0	0	0	0.9	0.095	0.905
PRKCD	LYZ	4446312	4434847	9606.ENSP00000378217	9606.ENSP00000261267	0	0	0	0	0.084	0	0.9	0.05	0.905
ALOX15	ALOX12	4450608	4434179	9606.ENSP00000458832	9606.ENSP00000251535	0	0	0.407	0.97	0.061	0	0.9	0.709	0.905
ADORA1	CXCL11	4442839	4438264	9606.ENSP00000356205	9606.ENSP00000306884	0	0	0	0	0	0	0.9	0.09	0.905
MAP2K4	ARRB1	4448551	4448521	9606.ENSP00000410402	9606.ENSP00000409581	0	0	0	0	0	0.336	0.8	0.349	0.905
PRKCD	MPO	4446312	4433305	9606.ENSP00000378217	9606.ENSP00000225275	0	0	0	0	0	0.064	0.9	0.069	0.905
PRKCA	PRKCQ	4448494	4435203	9606.ENSP00000408695	9606.ENSP00000263125	0	0	0	0.895	0	0	0.9	0.547	0.905
CXCL11	C5	4438264	4433289	9606.ENSP00000306884	9606.ENSP00000223642	0	0	0	0	0	0	0.9	0.089	0.905
ADORA3	C5	4443373	4433289	9606.ENSP00000358730	9606.ENSP00000223642	0	0	0	0	0	0	0.9	0.093	0.905
ELANE	HPSE	4450799	4447096	9606.ENSP00000466090	9606.ENSP00000384262	0	0	0	0	0.061	0	0.9	0.073	0.905
ADORA1	C5	4442839	4433289	9606.ENSP00000356205	9606.ENSP00000223642	0	0	0	0	0	0	0.9	0.097	0.905
CXCL8	SSTR1	4438229	4435759	9606.ENSP00000306512	9606.ENSP00000267377	0	0	0	0	0	0	0.9	0.095	0.905
AKT1	MAPK1	4450372	4432880	9606.ENSP00000451828	9606.ENSP00000215832	0	0	0.304	0.592	0.066	0.146	0.8	0.948	0.905
MAP2K4	FLT4	4448551	4434983	9606.ENSP00000410402	9606.ENSP00000261937	0	0	0	0.58	0	0	0.9	0.163	0.905
PRKCB	ADRA2A	4438120	4436361	9606.ENSP00000305355	9606.ENSP00000280155	0	0	0	0	0.061	0.056	0.9	0.062	0.905
CASP8	CD14	4442125	4438033	9606.ENSP00000351273	9606.ENSP00000304236	0	0	0	0	0.062	0	0.9	0.07	0.905
OPRM1	CX3CR1	4447859	4442101	9606.ENSP00000394624	9606.ENSP00000351059	0	0	0	0.678	0	0	0.9	0.214	0.905
TPO	CTSD	4439227	4433665	9606.ENSP00000318820	9606.ENSP00000236671	0	0	0	0	0.088	0	0.9	0.046	0.905
MAPK9	NFKB1	4447857	4433374	9606.ENSP00000394560	9606.ENSP00000226574	0	0	0	0	0	0.261	0.8	0.408	0.904
PRKCE	PRKCQ	4438196	4435203	9606.ENSP00000306124	9606.ENSP00000263125	0	0	0	0.908	0	0	0.9	0.473	0.904
CX3CR1	OPRK1	4442101	4435619	9606.ENSP00000351059	9606.ENSP00000265572	0	0	0	0.715	0	0	0.9	0.189	0.904
ALOX15	CYP3A4	4450608	4440831	9606.ENSP00000458832	9606.ENSP00000337915	0	0	0	0	0	0	0.9	0.087	0.904
CXCL2	OPRK1	4449392	4435619	9606.ENSP00000427279	9606.ENSP00000265572	0	0	0	0	0	0	0.9	0.088	0.904
ADORA3	CXCL11	4443373	4438264	9606.ENSP00000358730	9606.ENSP00000306884	0	0	0	0	0	0	0.9	0.087	0.904
CXCL2	OPRM1	4449392	4447859	9606.ENSP00000427279	9606.ENSP00000394624	0	0	0	0	0	0	0.9	0.088	0.904
ADRA2A	PRKCQ	4436361	4435203	9606.ENSP00000280155	9606.ENSP00000263125	0	0	0	0	0	0	0.9	0.081	0.904
SLPI	NFKB1	4441219	4433374	9606.ENSP00000342082	9606.ENSP00000226574	0	0	0	0	0.061	0	0.9	0.06	0.904
EPRS	SARS	4442762	4433635	9606.ENSP00000355890	9606.ENSP00000234677	0.148	0	0	0	0.554	0.084	0	0.758	0.904
SSTR2	CXCL8	4442018	4438229	9606.ENSP00000350198	9606.ENSP00000306512	0	0	0	0	0	0	0.9	0.087	0.904
HPSE	NFKB1	4447096	4433374	9606.ENSP00000384262	9606.ENSP00000226574	0	0	0	0	0.057	0	0.9	0.064	0.904
CAT	HMOX1	4433793	4432912	9606.ENSP00000241052	9606.ENSP00000216117	0	0	0	0	0.062	0.194	0	0.883	0.904
IKBKB	CD14	4449555	4438033	9606.ENSP00000430684	9606.ENSP00000304236	0	0	0	0	0.061	0	0.9	0.067	0.904
NOS1	TNNI3	4451263	4441191	9606.ENSP00000477999	9606.ENSP00000341838	0	0	0	0	0	0	0.9	0.087	0.904
CX3CR1	C5	4442101	4433289	9606.ENSP00000351059	9606.ENSP00000223642	0	0	0	0	0	0	0.9	0.083	0.904
PRKCA	ADAM17	4448494	4438549	9606.ENSP00000408695	9606.ENSP00000309968	0	0	0	0	0	0	0.9	0.083	0.904
CXCL2	PTGER3	4449392	4441881	9606.ENSP00000427279	9606.ENSP00000349003	0	0	0	0	0	0	0.9	0.088	0.904
STAT4	SOD1	4446006	4435927	9606.ENSP00000376134	9606.ENSP00000270142	0	0	0	0	0	0	0.9	0.073	0.903
MMP9	TGFB1	4443919	4433189	9606.ENSP00000361405	9606.ENSP00000221930	0	0	0	0	0.085	0.518	0	0.798	0.903
PRKACA	BCL2L1	4438521	4437866	9606.ENSP00000309591	9606.ENSP00000302564	0	0	0	0	0.065	0	0.9	0.05	0.903
OAT	NAGS	4443204	4437012	9606.ENSP00000357838	9606.ENSP00000293404	0.295	0	0	0	0.415	0	0	0.785	0.903
CHUK	MTOR	4443527	4442490	9606.ENSP00000359424	9606.ENSP00000354558	0	0	0	0	0.058	0.882	0	0.197	0.903
CXCL2	CCL2	4449392	4433339	9606.ENSP00000427279	9606.ENSP00000225831	0	0	0	0	0.193	0	0	0.885	0.903
RELA	TGFB2	4447098	4442765	9606.ENSP00000384273	9606.ENSP00000355896	0	0	0	0	0	0	0.9	0.079	0.903
APRT	PDE4D	4445041	4441530	9606.ENSP00000367615	9606.ENSP00000345502	0	0	0	0	0	0	0.9	0.079	0.903
SSTR1	MTNR1B	4435759	4434528	9606.ENSP00000267377	9606.ENSP00000257068	0	0	0	0.68	0	0	0.9	0.131	0.903
CAV1	PML	4440933	4435801	9606.ENSP00000339191	9606.ENSP00000268058	0	0	0	0	0	0	0.9	0.07	0.903
CDK1	RASA1	4446389	4436131	9606.ENSP00000378699	9606.ENSP00000274376	0	0	0	0	0	0.05	0.9	0.069	0.903
ELANE	PRKCD	4450799	4446312	9606.ENSP00000466090	9606.ENSP00000378217	0	0	0	0	0	0	0.9	0.079	0.903
IL1B	IFNG	4435241	4433446	9606.ENSP00000263341	9606.ENSP00000229135	0	0	0	0	0.082	0	0	0.898	0.902
RXRA	BCL2	4449061	4446777	9606.ENSP00000419692	9606.ENSP00000381185	0	0	0	0	0	0.064	0.9	0.046	0.902
GPT	F2	4446354	4438421	9606.ENSP00000378408	9606.ENSP00000308541	0	0	0	0	0.061	0	0	0.9	0.902
OPRK1	C5	4435619	4433289	9606.ENSP00000265572	9606.ENSP00000223642	0	0	0	0	0	0	0.9	0.063	0.902
RET	PRKACA	4441779	4438521	9606.ENSP00000347942	9606.ENSP00000309591	0	0	0	0.605	0.064	0	0.9	0.049	0.902
TAT	TPO	4441813	4439227	9606.ENSP00000348234	9606.ENSP00000318820	0	0	0	0	0.061	0	0.9	0.042	0.902
STAT5B	FGF23	4437006	4433694	9606.ENSP00000293328	9606.ENSP00000237837	0	0	0	0	0	0	0.9	0.067	0.902
AR	TP53	4444436	4435880	9606.ENSP00000363822	9606.ENSP00000269305	0	0	0	0	0	0.379	0	0.848	0.902
DRD2	CXCL10	4442557	4438146	9606.ENSP00000354859	9606.ENSP00000305651	0	0	0	0	0	0	0.9	0.064	0.902
RXRA	CDK1	4449061	4446389	9606.ENSP00000419692	9606.ENSP00000378699	0	0	0	0	0	0	0.9	0.064	0.902
PRSS1	MMP3	4438439	4437610	9606.ENSP00000308720	9606.ENSP00000299855	0	0	0	0	0	0	0.9	0.063	0.902
SMOX	ALDH3A1	4451286	4448623	9606.ENSP00000478305	9606.ENSP00000411821	0	0	0	0	0.061	0	0.9	0	0.902
HPSE	SLPI	4447096	4441219	9606.ENSP00000384262	9606.ENSP00000342082	0	0	0	0	0.061	0	0.9	0	0.902
HPSE	ARG1	4447096	4441926	9606.ENSP00000384262	9606.ENSP00000349446	0	0	0	0	0.061	0	0.9	0	0.902
PTEN	ERBB2	4443848	4435897	9606.ENSP00000361021	9606.ENSP00000269571	0	0	0	0	0	0.185	0	0.884	0.902
PRKACA	ERBB2	4438521	4435897	9606.ENSP00000309591	9606.ENSP00000269571	0	0	0	0.598	0	0	0.9	0.104	0.902
PTAFR	EDN2	4444275	4443976	9606.ENSP00000362965	9606.ENSP00000361668	0	0	0	0	0.061	0	0.9	0	0.902
CXCL10	IFNG	4438146	4433446	9606.ENSP00000305651	9606.ENSP00000229135	0	0	0	0	0.118	0	0	0.893	0.902
GNMT	ALAS2	4444029	4440351	9606.ENSP00000361894	9606.ENSP00000332369	0	0	0	0	0.062	0	0.9	0	0.902
SSTR2	MTNR1B	4442018	4434528	9606.ENSP00000350198	9606.ENSP00000257068	0	0	0	0.662	0	0	0.9	0.12	0.902
PRKACA	KDR	4438521	4435337	9606.ENSP00000309591	9606.ENSP00000263923	0	0	0	0.578	0	0	0.9	0.073	0.901
PDGFB	RASA1	4440178	4436131	9606.ENSP00000330382	9606.ENSP00000274376	0	0	0	0	0	0	0.9	0.054	0.901
DRD2	CX3CR1	4442557	4442101	9606.ENSP00000354859	9606.ENSP00000351059	0	0	0	0.567	0	0	0.9	0.074	0.901
PTGER3	MTNR1B	4441881	4434528	9606.ENSP00000349003	9606.ENSP00000257068	0	0	0	0	0	0	0.9	0.056	0.901
MAPK8	CASP3	4446429	4438651	9606.ENSP00000378974	9606.ENSP00000311032	0	0	0	0	0.055	0.294	0	0.863	0.901
ALOX15	CYP1A2	4450608	4441211	9606.ENSP00000458832	9606.ENSP00000342007	0	0	0	0	0	0	0.9	0.057	0.901
MTNR1B	C5	4434528	4433289	9606.ENSP00000257068	9606.ENSP00000223642	0	0	0	0	0.054	0	0.9	0	0.901
CXCL10	ADRA2A	4438146	4436361	9606.ENSP00000305651	9606.ENSP00000280155	0	0	0	0	0	0	0.9	0.053	0.901
MTOR	PPARG	4442490	4436745	9606.ENSP00000354558	9606.ENSP00000287820	0	0	0	0	0	0	0.8	0.529	0.901
PLAU	GAA	4444017	4438152	9606.ENSP00000361850	9606.ENSP00000305692	0	0	0	0	0	0	0.9	0.054	0.901
VEGFA	PRKACA	4451310	4438521	9606.ENSP00000478570	9606.ENSP00000309591	0	0	0	0	0	0	0.9	0.056	0.901
CX3CR1	ADRA2A	4442101	4436361	9606.ENSP00000351059	9606.ENSP00000280155	0	0	0	0.565	0	0	0.9	0.073	0.901
BRCA1	TOP2A	4448999	4448614	9606.ENSP00000418960	9606.ENSP00000411532	0	0	0	0	0.68	0.379	0	0.542	0.901
PRKCD	SHH	4446312	4437380	9606.ENSP00000378217	9606.ENSP00000297261	0	0	0	0	0	0	0.9	0.051	0.901
TNFSF11	RUNX2	4446858	4443746	9606.ENSP00000381775	9606.ENSP00000360493	0	0	0	0	0	0	0	0.901	0.901
B4GALT1	ACPP	4445266	4439571	9606.ENSP00000369055	9606.ENSP00000323036	0	0	0	0	0	0	0.9	0.057	0.901
CXCL11	OPRK1	4438264	4435619	9606.ENSP00000306884	9606.ENSP00000265572	0	0	0	0	0	0	0.9	0.057	0.901
OPRM1	CXCL11	4447859	4438264	9606.ENSP00000394624	9606.ENSP00000306884	0	0	0	0	0	0	0.9	0.053	0.901
SSTR2	PTGER3	4442018	4441881	9606.ENSP00000350198	9606.ENSP00000349003	0	0	0	0	0	0	0.9	0.058	0.901
PTAFR	OXT	4444275	4433016	9606.ENSP00000362965	9606.ENSP00000217386	0	0	0	0	0	0	0.9	0.047	0.9
PRKCA	NCF1	4448494	4436815	9606.ENSP00000408695	9606.ENSP00000289473	0	0	0	0	0	0.336	0.8	0.31	0.9
TNF	LEP	4448041	4438805	9606.ENSP00000398698	9606.ENSP00000312652	0	0	0	0	0	0	0	0.9	0.9
CXCL10	MTNR1B	4438146	4434528	9606.ENSP00000305651	9606.ENSP00000257068	0	0	0	0	0	0	0.9	0	0.9
DRD2	CXCL11	4442557	4438264	9606.ENSP00000354859	9606.ENSP00000306884	0	0	0	0	0	0	0.9	0	0.9
PTAFR	PML	4444275	4435801	9606.ENSP00000362965	9606.ENSP00000268058	0	0	0	0	0	0	0.9	0	0.9
CXCL2	SSTR1	4449392	4435759	9606.ENSP00000427279	9606.ENSP00000267377	0	0	0	0	0	0	0.9	0	0.9
F2	HCRT	4438421	4437007	9606.ENSP00000308541	9606.ENSP00000293330	0	0	0	0	0	0	0.9	0.046	0.9
OPRM1	C5	4447859	4433289	9606.ENSP00000394624	9606.ENSP00000223642	0	0	0	0	0	0	0.9	0.046	0.9
CXCL2	ADRA2A	4449392	4436361	9606.ENSP00000427279	9606.ENSP00000280155	0	0	0	0	0	0	0.9	0.041	0.9
CX3CR1	SSTR2	4442101	4442018	9606.ENSP00000351059	9606.ENSP00000350198	0	0	0	0.695	0	0	0.9	0.046	0.9
EDN2	HCRT	4443976	4437007	9606.ENSP00000361668	9606.ENSP00000293330	0	0	0	0	0	0	0.9	0	0.9
PTGER3	C5	4441881	4433289	9606.ENSP00000349003	9606.ENSP00000223642	0	0	0	0	0	0	0.9	0	0.9
CXCL11	SSTR1	4438264	4435759	9606.ENSP00000306884	9606.ENSP00000267377	0	0	0	0	0	0	0.9	0	0.9
PTAFR	GAA	4444275	4438152	9606.ENSP00000362965	9606.ENSP00000305692	0	0	0	0	0	0	0.9	0	0.9
CX3CR1	MTNR1B	4442101	4434528	9606.ENSP00000351059	9606.ENSP00000257068	0	0	0	0.596	0	0	0.9	0.042	0.9
PGR	PRKACA	4439740	4438521	9606.ENSP00000325120	9606.ENSP00000309591	0	0	0	0	0	0	0.9	0	0.9
PRKACA	ERBB3	4438521	4435741	9606.ENSP00000309591	9606.ENSP00000267101	0	0	0	0.578	0	0	0.9	0.047	0.9
FOS	EGFR	4438204	4436186	9606.ENSP00000306245	9606.ENSP00000275493	0	0	0	0	0	0.533	0	0.794	0.9
ADRA2A	C5	4436361	4433289	9606.ENSP00000280155	9606.ENSP00000223642	0	0	0	0	0	0	0.9	0	0.9
SSTR1	C5	4435759	4433289	9606.ENSP00000267377	9606.ENSP00000223642	0	0	0	0	0	0	0.9	0	0.9
CXCL11	MTNR1B	4438264	4434528	9606.ENSP00000306884	9606.ENSP00000257068	0	0	0	0	0	0	0.9	0	0.9
PTAFR	HCRT	4444275	4437007	9606.ENSP00000362965	9606.ENSP00000293330	0	0	0	0	0	0	0.9	0	0.9
OXTR	F2	4439675	4438421	9606.ENSP00000324270	9606.ENSP00000308541	0	0	0	0	0	0	0.9	0.042	0.9
ARRB1	F2	4448521	4438421	9606.ENSP00000409581	9606.ENSP00000308541	0	0	0	0	0	0	0.9	0	0.9
HPSE	LCN2	4447096	4444080	9606.ENSP00000384262	9606.ENSP00000362108	0	0	0	0	0	0	0.9	0.046	0.9
SSTR2	CXCL11	4442018	4438264	9606.ENSP00000350198	9606.ENSP00000306884	0	0	0	0	0	0	0.9	0	0.9
IL1B	IL2	4435241	4433376	9606.ENSP00000263341	9606.ENSP00000226730	0	0	0	0	0	0	0	0.9	0.9
PCNA	STAT5A	4445167	4441128	9606.ENSP00000368458	9606.ENSP00000341208	0	0	0	0	0	0	0.9	0	0.9
PRKCD	PRTN3	4446312	4433625	9606.ENSP00000378217	9606.ENSP00000234347	0	0	0	0	0	0	0.9	0	0.9
DRD2	C5	4442557	4433289	9606.ENSP00000354859	9606.ENSP00000223642	0	0	0	0	0	0	0.9	0	0.9
CXCL10	SSTR1	4438146	4435759	9606.ENSP00000305651	9606.ENSP00000267377	0	0	0	0	0	0	0.9	0	0.9
VCAM1	PML	4437090	4435801	9606.ENSP00000294728	9606.ENSP00000268058	0	0	0	0	0	0	0.9	0.05	0.9
SSTR2	CXCL10	4442018	4438146	9606.ENSP00000350198	9606.ENSP00000305651	0	0	0	0	0	0	0.9	0.043	0.9
PRKACA	CSF2	4438521	4437349	9606.ENSP00000309591	9606.ENSP00000296871	0	0	0	0	0	0	0.9	0	0.9
SMOX	ALDH9A1	4451286	4441659	9606.ENSP00000478305	9606.ENSP00000346827	0	0	0	0	0	0	0.9	0.043	0.9
PRKCD	ARG1	4446312	4441926	9606.ENSP00000378217	9606.ENSP00000349446	0	0	0	0	0	0	0.9	0	0.9
CXCL2	MTNR1B	4449392	4434528	9606.ENSP00000427279	9606.ENSP00000257068	0	0	0	0	0	0	0.9	0	0.9
CD14	FADD	4438033	4437802	9606.ENSP00000304236	9606.ENSP00000301838	0	0	0	0	0	0	0.9	0	0.9
PRKACA	NOS3	4438521	4437409	9606.ENSP00000309591	9606.ENSP00000297494	0	0	0	0	0	0	0.9	0.048	0.9
CXCL2	DRD2	4449392	4442557	9606.ENSP00000427279	9606.ENSP00000354859	0	0	0	0	0	0	0.9	0	0.9
ACPP	GAA	4439571	4438152	9606.ENSP00000323036	9606.ENSP00000305692	0	0	0	0	0	0	0.9	0	0.9
SSTR2	C5	4442018	4433289	9606.ENSP00000350198	9606.ENSP00000223642	0	0	0	0	0	0	0.9	0	0.9
ADAM17	PRKCB	4438549	4438120	9606.ENSP00000309968	9606.ENSP00000305355	0	0	0	0	0	0	0.9	0	0.9
AVP	WNT5A	4445364	4435460	9606.ENSP00000369647	9606.ENSP00000264634	0	0	0	0	0	0	0.9	0	0.9
AVP	PTAFR	4445364	4444275	9606.ENSP00000369647	9606.ENSP00000362965	0	0	0	0	0	0	0.9	0	0.9
PCNA	STAT5B	4445167	4437006	9606.ENSP00000368458	9606.ENSP00000293328	0	0	0	0	0	0	0.9	0	0.9
CXCL11	ADRA2A	4438264	4436361	9606.ENSP00000306884	9606.ENSP00000280155	0	0	0	0	0	0	0.9	0	0.9
SLC25A4	OTC	4436430	4432619	9606.ENSP00000281456	9606.ENSP00000039007	0	0	0	0	0	0	0.9	0	0.9
CXCL2	SSTR2	4449392	4442018	9606.ENSP00000427279	9606.ENSP00000350198	0	0	0	0	0	0	0.9	0.05	0.9
CX3CR1	SSTR1	4442101	4435759	9606.ENSP00000351059	9606.ENSP00000267377	0	0	0	0.687	0	0	0.9	0	0.9
