# Supplementary material for: Synergistic Network Pharmacology for Traditional Chinese Medicine Liangxue Tongyu Formula in Acute Intracerebral Hemorrhagic Stroke
Source: Neural Plast. 2021 Feb 26;2021:8874296. doi: 10.1155/2021/8874296 (PMC7936909; doi:10.1155/2021/8874296)
Supplement: Supplementary Materials — S1 Table. 517 compounds of 8 herbs in LXTYF collected from TCMSP and BATMAN-TCM database. S2 Table. 874 targets of the active ingredients obtained from the TCMSP. S3 Table. 149 targets of active components predicted from the SwissTargetPrediction database. S4 Table. 2315 targets relating to ICH collected from GAD, Genecards, and DisGeNET database. S5 Table. Topological parameters of component-target network. S6 Table. Proteins-proteins interaction information of LXTYF targets for AICH in STRING 11.0. S7 Table. Topological parameters of the PPI network. S8 Table. Results of putative targets for KEGG pathway enrichment analysis. S9 Table. Detailed information of 583 differentially expressed mRNAs identified between MGT and MG. S10 Table. Details of the Herb-Compound-Target-Pathway(H-C-T-P) network connection verified in RNA-seq. [file 8874296.f1.zip › Supplementary Table S1-S10/S7 Table.xlsx]

## Sheet: Table S7
Table S7.Topological parameters of the PPI network
Node	Degree	Betweenness centrality	Closeness centrality	Average shortest path length
STAT3	45	0.175874	0.441341	2.26582
TP53	38	0.102047	0.404437	2.47257
AKT1	36	0.14507	0.420959	2.37553
SRC	36	0.117119	0.413613	2.41772
JUN	34	0.0954299	0.423971	2.35865
TNF	32	0.0622031	0.381029	2.62447
MAPK1	31	0.0742051	0.413613	2.41772
VEGFA	26	0.0615525	0.387255	2.58228
IL6	25	0.0505278	0.367442	2.72152
EGFR	24	0.0301551	0.373817	2.67511
EGF	24	0.0236355	0.358006	2.79325
CCND1	21	0.0375912	0.372057	2.68776
RELA	21	0.0159176	0.373817	2.67511
FOS	20	0.0207375	0.381029	2.62447
RB1	19	0.0294995	0.366873	2.72574
ESR1	19	0.0338305	0.382258	2.61603
CASP8	18	0.0180011	0.346999	2.88186
MAPK8	18	0.0236905	0.370312	2.70042
CDKN1A	18	0.0273938	0.376789	2.65401
IL2	18	0.0113318	0.373228	2.67932
MYC	18	0.0281646	0.379808	2.63291
STAT5A	18	0.0225367	0.377389	2.64979
STAT1	18	0.0178052	0.367442	2.72152
FYN	17	0.035163	0.352679	2.83544
CXCL8	17	0.0224472	0.359636	2.78059
MAPK14	17	0.02655	0.375	2.66667
IL10	16	0.00657417	0.335694	2.9789
IGF1	15	0.0120256	0.356928	2.80169
IL1B	15	0.0112775	0.35479	2.81857
E2F1	14	0.0733536	0.328255	3.04641
IL4	14	0.0156522	0.350592	2.85232
BCL2L1	13	0.0259488	0.371473	2.69198
CDK2	13	0.00395172	0.312253	3.20253
PLG	13	0.00634205	0.309399	3.23207
STAT5B	13	0.0101753	0.360182	2.77637
CCNA2	12	0.00359006	0.306202	3.26582
CASP3	12	0.0262786	0.340517	2.93671
CYCS	12	0.0432104	0.292593	3.41772
NFKB1	12	0.00419535	0.352679	2.83544
EDN1	12	0.0856803	0.369159	2.70886
CDK1	11	0.00349377	0.293317	3.40928
NOS3	11	0.050938	0.352155	2.83966
ERBB2	11	0.00481251	0.341991	2.92405
CDK6	10	0.00051962	0.299242	3.34177
CDK4	10	0.00054124	0.292954	3.4135
IKBKB	10	0.00764574	0.334746	2.98734
CAV1	10	0.00523731	0.361832	2.76371
PTPN1	10	0.00235595	0.343977	2.90717
PRKCD	10	0.017404	0.368585	2.71308
HIF1A	9	0.00568807	0.369159	2.70886
CCNB1	9	0.0005952	0.282479	3.54008
PCNA	9	0.00533597	0.287971	3.47257
CDKN2A	9	0.00169162	0.317269	3.1519
CHUK	9	0.00422089	0.332865	3.00422
CCL2	9	0.0001876	0.343478	2.91139
CSF2	9	0.00045504	0.341007	2.93249
TGFB1	9	0.00231315	0.330544	3.02532
MTOR	8	0.00260977	0.344978	2.89873
PPARG	8	0.0309886	0.338088	2.95781
BCL2	8	0.0046069	0.319407	3.1308
TLR4	8	0.0202748	0.309804	3.22785
GATA3	8	0.0101536	0.334746	2.98734
NR3C1	8	0.00046185	0.338571	2.95359
SERPINE1	7	0.00239482	0.30038	3.32911
FADD	7	0.0024912	0.317694	3.14768
KDR	7	0.00336236	0.313078	3.19409
GSK3B	7	0.00224376	0.339056	2.94937
FGF2	7	0.00566034	0.337607	2.96203
IGFBP3	7	0.00643321	0.325997	3.06751
F2	7	0.0451754	0.303069	3.29958
INS	7	0.00087793	0.324658	3.08017
MMP9	7	0.0028805	0.340029	2.94093
PLCG2	7	0.00646584	0.311842	3.20675
CXCL10	7	0.00303742	0.317269	3.1519
IFNG	7	0.00108534	0.308594	3.24051
TERT	7	0.00048129	0.341499	2.92827
NOS2	7	0.026267	0.359091	2.78481
IRF1	7	0.00305226	0.31516	3.173
PTGS2	7	0.0478787	0.318548	3.13924
MMP2	7	0.0376054	0.338571	2.95359
FAS	6	0.00423375	0.331933	3.01266
CASP9	6	0.0048484	0.321574	3.1097
CAT	6	0.0182368	0.316422	3.16034
BAX	6	0.00232374	0.310209	3.22363
DNMT1	6	0.0160924	0.302296	3.30802
BIRC5	6	0.00770183	0.333333	3
PTEN	6	0.00723386	0.329624	3.03376
BRCA1	6	0.00604099	0.312665	3.19831
ARG1	6	0.0296993	0.285887	3.49789
AR	6	0.00244051	0.329624	3.03376
PDGFB	6	0.0018251	0.324213	3.08439
ICAM1	6	0.00886699	0.326446	3.06329
MMP3	6	0.00232502	0.32377	3.08861
RAF1	6	0.00199317	0.346999	2.88186
OTC	5	0.00188777	0.224432	4.4557
SDHD	5	0.00208289	0.227666	4.39241
SDHC	5	0.00208289	0.227666	4.39241
SDHB	5	0.00208289	0.227666	4.39241
SDHA	5	0.00208289	0.227666	4.39241
FGF23	5	0.00932296	0.276224	3.62025
MAPK9	5	0.00063415	0.322011	3.10549
FGFR2	5	0.00680485	0.32871	3.04219
BAK1	5	0.00134616	0.298865	3.34599
FOXP3	5	0.00042364	0.290086	3.44726
RXRA	5	0.0336122	0.260154	3.84388
TOP2A	5	0.00073771	0.263041	3.80169
MTR	5	0.0416935	0.203259	4.91983
ARRB1	5	0.010224	0.321574	3.1097
COL1A1	5	0.0251377	0.256771	3.89451
ERBB3	5	0.00056699	0.325103	3.07595
LEP	5	0.0027326	0.316422	3.16034
SPARC	5	0.00437378	0.285199	3.50633
CXCL2	5	0.00096916	0.313492	3.18987
CYP2E1	5	0.0214305	0.246362	4.05907
PGR	5	0.00061132	0.325103	3.07595
MMP1	5	0.00046833	0.316422	3.16034
ASS1	4	0.025362	0.263333	3.79747
F3	4	0.00834942	0.233959	4.27426
PLAU	4	0.00123804	0.284856	3.51055
POLA1	4	0.00072	0.271789	3.67932
DHFR	4	0.0577845	0.252128	3.96624
TYMS	4	0.00130001	0.252396	3.96203
SOD2	4	0.00070295	0.320704	3.11814
OXT	4	0.0168419	0.216044	4.62869
IL1A	4	0.00011779	0.273988	3.64979
HMOX1	4	0.00853695	0.305806	3.27004
IGF2	4	0.00014136	0.297739	3.35865
CASP1	4	0.00132323	0.306202	3.26582
ERBB4	4	0.00207471	0.281807	3.54852
FH	4	0	0.186028	5.37553
HSPB1	4	0.00466363	0.321574	3.1097
PRKCA	4	0.00011586	0.305412	3.27426
TNFAIP3	4	4.172e-05	0.288672	3.46414
AVP	4	0.0498462	0.273672	3.65401
EZR	4	0.00062193	0.311432	3.21097
ADAM17	4	0.00171644	0.305019	3.27848
PPARA	4	0.0361438	0.31516	3.173
STAT4	4	0.00032752	0.311842	3.20675
PLAT	3	0.00051338	0.24895	4.01688
EGLN1	3	0.00105914	0.301527	3.31646
F7	3	1.788e-05	0.190209	5.25738
POLE	3	5.811e-05	0.245596	4.07173
PCCA	3	0.666667	0.8	1.25
FLT1	3	0	0.281807	3.54852
FGF1	3	7.402e-05	0.261589	3.82278
SOD1	3	0	0.303069	3.29958
CBS	3	0.00420153	0.169407	5.90295
CTH	3	0.00420153	0.169407	5.90295
ELANE	3	0.6	0.714286	1.4
ALAD	3	0.666667	1	1
MPO	3	0.4	0.625	1.6
DNMT3A	3	0.00245016	0.281139	3.55696
CPS1	3	0.00843882	0.210293	4.75527
COL3A1	3	0	0.20484	4.88186
ADH1B	3	0.00054289	0.21048	4.75105
ALDH2	3	0.00664036	0.246362	4.05907
FLT4	3	0	0.281807	3.54852
F10	3	5.364e-05	0.190209	5.25738
BTK	3	0.00013728	0.275261	3.63291
MAP2K4	3	3.87e-05	0.288672	3.46414
OAT	3	8.343e-05	0.223796	4.46835
GRIN1	3	5.466e-05	0.263041	3.80169
GRIN2A	3	0.00293551	0.265101	3.77215
PARP1	3	0.00049316	0.262458	3.81013
CD14	3	0.00137285	0.259016	3.86076
PRKCQ	3	7.779e-05	0.282816	3.53586
CXCL11	3	0	0.265993	3.75949
PRKCE	3	0.00019842	0.316	3.16456
MAPT	3	0.0002143	0.285542	3.50211
F9	3	0.00416577	0.233728	4.27848
COL5A1	3	0	0.20484	4.88186
LEF1	3	0.00843882	0.285199	3.50633
WNT5A	3	0.00011853	0.298489	3.35021
MET	3	7.676e-05	0.325997	3.06751
SPP1	3	0.0002736	0.274942	3.63713
PML	3	0.00012952	0.29588	3.37975
PRKCB	3	7.779e-05	0.282816	3.53586
PTGS1	3	6.794e-05	0.21048	4.75105
CSNK2A1	3	0.00023396	0.317694	3.14768
ALOX15	3	0.00647657	0.265101	3.77215
PLOD1	3	0	0.20484	4.88186
RASA1	3	0	0.306202	3.26582
ESR2	3	0.00057163	0.317269	3.1519
TGFB2	3	0	0.295143	3.38819
PCCB	2	0	0.571429	1.75
TNNI3	2	0	1	1
TNNC1	2	0	1	1
TNNT2	2	0	1	1
THBD	2	0.00416577	0.233498	4.2827
DNMT3B	2	0	0.235586	4.24473
OXTR	2	0	0.215651	4.63713
EPAS1	2	0.0001987	0.280142	3.56962
SLPI	2	0.4	0.555556	1.8
HMBS	2	0	0.75	1.33333
TOP1	2	0.00056848	0.256771	3.89451
NFE2L2	2	0	0.298865	3.34599
PRTN3	2	0	0.555556	1.8
MTRR	2	0	0.169165	5.91139
ADRB2	2	0.00021931	0.271478	3.68354
VCAM1	2	4.914e-05	0.277193	3.60759
UROD	2	0	0.75	1.33333
GRIN2B	2	0	0.261301	3.827
NR1H4	2	0.00843882	0.206987	4.83122
MCCC2	2	0.5	0.666667	1.5
NAGS	2	0	0.20992	4.76371
HLCS	2	0	0.571429	1.75
MMACHC	2	0	0.169165	5.91139
PRLR	2	5.97e-06	0.274942	3.63713
ODC1	2	0	0.222744	4.48945
BHMT	2	0	0.145043	6.89451
CRP	2	0.0001195	0.272727	3.66667
LBP	2	0	0.24159	4.13924
ACADM	2	0.0168061	0.240854	4.1519
CD40LG	2	3.245e-05	0.299621	3.33755
HADHA	2	0.00843882	0.194581	5.13924
NEDD4	2	0.00012339	0.253205	3.94937
ALOX5	2	0.000984	0.242331	4.12658
STAT2	2	0	0.272414	3.67089
ADH1C	2	0	0.197995	5.05063
RUNX2	2	0	0.307393	3.25316
CALCA	2	0.00843882	0.215455	4.64135
NOS1	2	0.00054007	0.227666	4.39241
CYP1A1	2	0.666667	0.75	1.33333
ALOX12	2	0.000984	0.242331	4.12658
CX3CR1	2	0	0.265695	3.76371
ADORA3	2	1	1	1
CYP3A4	2	0.666667	0.75	1.33333
AIMP1	1	0	1	1
EPRS	1	0	1	1
KL	1	0	0.216636	4.61603
UHRF1	1	0	0.232353	4.3038
IVD	1	0	0.444444	2.25
DRD2	1	0	1	1
SLC6A3	1	0	1	1
APRT	1	0	1	1
HPRT1	1	0	1	1
NOX1	1	0	1	1
NCF1	1	0	1	1
TNFSF11	1	0	0.276224	3.62025
EDN2	1	0	0.269932	3.70464
PIK3CG	1	0	0.296621	3.37131
ALAS2	1	0	0.6	1.66667
ABCB1	1	0	0.288321	3.46835
LCN2	1	0	0.384615	2.6
ACADS	1	0	0.162999	6.13502
RHO	1	0	0.243577	4.10549
APOE	1	0	0.269012	3.7173
MMP14	1	0	0.253205	3.94937
HCRT	1	0	0.177794	5.62447
ADCYAP1	1	0	0.177395	5.63713
GLUL	1	0	0.173881	5.75105
PAX5	1	0	0.222118	4.50211
CYP19A1	1	0	0.276869	3.61181
TH	1	0	1	1
TYR	1	0	1	1
GSTM1	1	0	0.5	2
CTSD	1	0	0.276869	3.61181
S100A9	1	0	0.236763	4.22363
PPARD	1	0	0.206626	4.83966
RET	1	0	0.292954	3.4135
TCF3	1	0	0.251059	3.98312
VDR	1	0	0.206626	4.83966
ABCB11	1	0	0.171615	5.827
SELE	1	0	0.246362	4.05907
ADRA2A	1	0	0.666667	1.5
CYP1A2	1	0	0.5	2
NQO1	1	0	0.234421	4.26582
AKR1B1	1	0	0.201531	4.96203
CYP2D6	1	0	1	1
MAOA	1	0	1	1
ALDH3A1	1	0	0.19783	5.05485
OPRM1	1	0	0.666667	1.5
SLC2A1	1	0	0.288321	3.46835
HTR2A	1	0	0.177794	5.62447
LYZ	1	0	0.416667	2.4
