# Supplementary material for: Synergistic Network Pharmacology for Traditional Chinese Medicine Liangxue Tongyu Formula in Acute Intracerebral Hemorrhagic Stroke
Source: Neural Plast. 2021 Feb 26;2021:8874296. doi: 10.1155/2021/8874296 (PMC7936909; doi:10.1155/2021/8874296)
Supplement: Supplementary Materials — S1 Table. 517 compounds of 8 herbs in LXTYF collected from TCMSP and BATMAN-TCM database. S2 Table. 874 targets of the active ingredients obtained from the TCMSP. S3 Table. 149 targets of active components predicted from the SwissTargetPrediction database. S4 Table. 2315 targets relating to ICH collected from GAD, Genecards, and DisGeNET database. S5 Table. Topological parameters of component-target network. S6 Table. Proteins-proteins interaction information of LXTYF targets for AICH in STRING 11.0. S7 Table. Topological parameters of the PPI network. S8 Table. Results of putative targets for KEGG pathway enrichment analysis. S9 Table. Detailed information of 583 differentially expressed mRNAs identified between MGT and MG. S10 Table. Details of the Herb-Compound-Target-Pathway(H-C-T-P) network connection verified in RNA-seq. [file 8874296.f1.zip › Supplementary Table S1-S10/S8 Table.xlsx]

## Sheet: KEGG-enrich analysed results
ID	Description	GeneRatio	BgRatio	pvalue	p.adjust	qvalue	geneID	Count
hsa04010	MAPK signaling pathway	49/345	271/5827	5.67e-13	8e-12	3.17e-12	7124/4137/7157/7042/3553/7422/7040/5155/207/355/3479/836/1950/1956/776/3791/2263/2247/4609/773/5594/3630/3552/2353/2064/4233/5921/2321/3725/5599/1432/6416/5578/1147/4790/5894/5970/2065/2324/929/3551/2246/5601/3315/8074/5579/2066/5566/408	49
hsa04151	PI3K-Akt signaling pathway	49/345	322/5827	3.77e-10	2.5e-09	9.91e-10	3569/5728/7099/7157/4846/7422/5155/207/2475/3479/1950/1956/3791/2263/1021/2247/595/4609/1019/5594/3630/842/3565/3558/598/2064/6696/4233/596/2321/5618/2932/5578/1147/672/4790/5894/1017/5970/2065/1026/5294/2324/3551/2246/1277/8074/2066/6256	49
hsa04668	TNF signaling pathway	33/345	103/5827	1.52e-16	4.92e-15	1.95e-15	7124/3569/3383/3553/4318/207/355/836/1906/5743/841/7412/6347/6401/5594/3627/4314/2353/3725/5599/1432/1437/6416/1147/4790/5970/7128/3551/8772/5601/4323/3659/2920	33
hsa04024	cAMP signaling pathway	33/345	192/5827	1.75e-08	9.13e-08	3.62e-08	207/776/1906/5144/2904/5594/4878/2902/2353/1813/5020/2903/3725/5599/6752/154/116/4790/5894/135/5970/476/134/153/6751/7137/1816/5601/5733/1907/5465/5566/5021	33
hsa04014	Ras signaling pathway	33/345	200/5827	4.93e-08	2.25e-07	8.91e-08	7422/5155/207/3479/1950/1956/3791/2263/2247/2904/5594/3630/2902/598/2903/4233/5921/2321/5599/5578/1147/4790/5894/5970/2324/3551/11186/2246/5601/8074/5579/5566/5336	33
hsa04657	IL-17 signaling pathway	31/345	85/5827	1.9e-17	7.92e-16	3.14e-16	7124/3569/3553/3458/4318/3576/836/5743/841/6347/5594/3627/4314/3565/2353/3725/5599/1432/1437/4312/2932/1147/4790/5970/7128/3551/8772/3934/5601/2920/6280	31
hsa04066	HIF-1 signaling pathway	30/345	104/5827	9.26e-14	1.59e-12	6.31e-13	3569/7099/4846/4843/7422/5054/3458/207/2475/3479/1950/1956/1906/3162/3091/5594/3630/4878/6774/2064/596/2321/6513/5578/4790/5970/1026/54583/5579/5336	30
hsa04926	Relaxin signaling pathway	28/345	113/5827	3.72e-11	2.86e-10	1.13e-10	4846/59/4843/1281/7422/7040/4318/207/1956/1906/4313/5594/2353/3725/4842/5599/6714/1432/6416/4312/5578/4790/5894/5970/5601/1277/5566/408	28
hsa04020	Calcium signaling pathway	27/345	173/5827	2.65e-06	9.2e-06	3.65e-06	4846/4843/1956/776/773/2902/2064/2903/4842/6786/154/291/3356/5578/135/2065/153/6261/1816/5733/5579/5724/2066/5566/5021/5336/7134	27
hsa04659	Th17 cell differentiation	26/345	97/5827	2.83e-11	2.43e-10	9.64e-11	3569/3553/7040/3458/2475/6772/3091/5594/3565/3558/6774/2353/3725/5599/1432/6776/1147/4790/5970/6777/2625/3551/5601/5588/50943/6256	26
hsa04210	Apoptosis	26/345	130/5827	2.58e-08	1.23e-07	4.89e-08	7124/7157/207/355/836/1509/841/5594/842/54205/2353/142/598/596/581/3725/5599/332/1147/4790/5894/5970/3551/8772/5601/578	26
hsa04015	Rap1 signaling pathway	26/345	191/5827	4.93e-05	0.000139723	5.54e-05	7422/5155/207/3479/1950/1956/3791/2263/2247/2904/5594/3630/2902/1813/2903/4233/2321/6714/1432/5578/5894/135/2324/2246/8074/5579	26
hsa04064	NF-kappa B signaling pathway	25/345	90/5827	2.94e-11	2.45e-10	9.71e-11	7124/7099/3383/3553/3576/5743/7412/5328/959/142/598/596/1147/695/4790/5970/7128/929/3551/8600/5588/2920/5579/3929/5336	25
hsa04625	C-type lectin receptor signaling pathway	25/345	95/5827	1.07e-10	7.26e-10	2.88e-10	7124/3569/3586/3553/207/6772/5743/841/5594/3558/3725/5599/6714/1432/6773/834/1147/4790/5894/5970/3551/5601/3659/5580/5336	25
hsa04621	NOD-like receptor signaling pathway	25/345	147/5827	1.25e-06	4.63e-06	1.84e-06	7124/3569/7099/3553/3576/6772/841/6347/5594/598/596/3725/5599/1432/6773/834/1147/4790/5970/7128/3551/8772/5601/2920/5580	25
hsa04630	JAK-STAT signaling pathway	25/345	148/5827	1.43e-06	5.15e-06	2.04e-06	3569/3586/3458/5155/207/2475/1950/1956/6772/595/4609/6775/3565/3558/6774/598/596/3952/1437/5618/6773/6776/5894/6777/1026	25
hsa04217	Necroptosis	24/345	131/5827	5.07e-07	1.97e-06	7.82e-07	7124/7099/3553/3458/355/6772/841/3552/6775/6774/142/596/581/5599/2752/6773/834/291/6776/6777/7128/8772/5601/246	24
hsa04062	Chemokine signaling pathway	24/345	165/5827	3.25e-05	9.37e-05	3.71e-05	207/3576/6772/6347/5594/3627/6774/6714/6773/2932/1147/4790/5894/5970/6777/5294/3551/1524/2920/5579/6373/5580/5566/408	24
hsa04917	Prolactin signaling pathway	23/345	68/5827	1.96e-12	2.29e-11	9.09e-12	207/6772/595/5594/3630/6774/2353/7054/5599/6714/2099/1432/5618/6776/2932/4790/5894/5970/6777/8600/2100/5601/3659	23
hsa05220	Chronic myeloid leukemia	23/345	73/5827	1.06e-11	1.14e-10	4.54e-11	7157/7042/7040/207/5925/1029/1021/595/4609/1019/5594/598/581/6776/1147/4790/5894/5970/6777/1026/1869/3551/578	23
hsa04660	T cell receptor signaling pathway	23/345	99/5827	8.57e-09	4.81e-08	1.91e-08	7124/3586/3458/207/959/1019/5594/3565/3558/2353/3725/5599/1432/1437/2932/1147/4790/5894/5970/3551/5601/5588/2534	23
hsa04068	FoxO signaling pathway	23/345	121/5827	4.45e-07	1.78e-06	7.05e-07	3569/5728/3586/7042/7040/207/3479/1950/1956/595/847/5594/3630/6774/5599/1432/1147/5894/1017/1026/3551/5601/891	23
hsa04012	ErbB signaling pathway	22/345	80/5827	5.83e-10	3.62e-09	1.44e-09	207/2475/1950/1956/4609/5594/2064/3725/5599/6714/6416/6776/2932/5578/5894/2065/6777/1026/5601/5579/2066/5336	22
hsa04071	Sphingolipid signaling pathway	22/345	108/5827	2.25e-07	9.14e-07	3.63e-07	7124/5728/7157/4846/207/1509/5594/10558/596/581/5599/1432/5578/4790/5894/5970/134/5601/140/5579/2534/5581	22
hsa04115	p53 signaling pathway	21/345	65/5827	5.04e-11	3.59e-10	1.42e-10	5728/7157/5054/355/3479/836/841/1029/1021/595/1019/842/54205/598/596/581/3486/1017/1026/983/891	21
hsa04931	Insulin resistance	21/345	97/5827	1.43e-07	6.06e-07	2.4e-07	7124/3569/5728/4846/207/2475/3630/6774/5599/6513/2932/4790/5970/3551/5601/5588/5579/5581/5465/5770/5580	21
hsa04919	Thyroid hormone signaling pathway	20/345	112/5827	6.96e-06	2.26e-05	8.95e-06	7157/207/2475/6772/595/4609/3091/5594/842/6714/2099/6513/2932/5578/5894/476/5579/5566/5336/6256	20
hsa04658	Th1 and Th2 cell differentiation	19/345	83/5827	2.25e-07	9.14e-07	3.63e-07	3458/6772/5594/6775/3565/3558/2353/3725/5599/1432/6776/1147/4790/5970/6777/2625/3551/5601/5588	19
hsa04728	Dopaminergic synapse	19/345	114/5827	3.27e-05	9.37e-05	3.71e-05	207/776/2904/773/2353/7054/1813/2903/5599/1432/6531/4129/2932/5578/4128/1816/5601/5579/5566	19
hsa04921	Oxytocin signaling pathway	19/345	129/5827	0.000183379	0.000486789	0.000193031	4846/1956/776/5743/595/5594/4878/2353/5020/3725/6714/5578/5894/1026/5294/6261/5579/5566/5021	19
hsa04726	Serotonergic synapse	18/345	96/5827	9.98e-06	3.13e-05	1.24e-05	836/776/5743/773/5742/5594/6532/3356/240/4129/5578/5894/4128/246/1565/5579/5566/239	18
hsa04915	Estrogen signaling pathway	18/345	116/5827	0.000137676	0.00036882	0.000146252	4846/4318/207/1956/1509/4313/5594/2353/596/3725/6714/2099/5241/5894/2100/4988/5580/5566	18
hsa04022	cGMP-PKG signaling pathway	17/345	147/5827	0.00579466	0.0114327	0.00453352	4846/207/776/5594/3630/4878/154/291/3778/5894/476/5294/134/153/140/150/5581	17
hsa04912	GnRH signaling pathway	16/345	81/5827	1.57e-05	4.74e-05	1.88e-05	1956/776/4313/5594/3725/5599/6714/1432/6416/5578/5894/5601/4323/5579/5580/5566	16
hsa04722	Neurotrophin signaling pathway	16/345	111/5827	0.000749098	0.00186639	0.000740096	7157/207/5594/596/581/3725/5599/1432/2932/4790/5894/5970/3551/5601/5580/5336	16
hsa04371	Apelin signaling pathway	16/345	117/5827	0.00133585	0.00314572	0.0012474	4846/59/5327/4843/5054/207/2475/595/5594/6696/4842/5894/5294/6261/5581/5566	16
hsa04664	Fc epsilon RI signaling pathway	15/345	62/5827	2.06e-06	7.33e-06	2.91e-06	7124/207/5594/3565/5599/1432/1437/6416/240/5578/695/5894/5601/2534/5336	15
hsa04920	Adipocytokine signaling pathway	15/345	66/5827	4.78e-06	1.6e-05	6.36e-06	7124/207/2475/6774/5599/3952/6513/1147/4790/5970/3551/5601/5588/5465/6256	15
hsa04750	Inflammatory mediator regulation of TRP channels	15/345	84/5827	9.92e-05	0.00027315	0.000108315	3553/3479/5599/6714/1432/3356/5578/5601/5588/5579/5581/5580/5566/5336/239	15
hsa04611	Platelet activation	15/345	110/5827	0.00192898	0.00440048	0.00174496	2147/4846/1281/207/5742/5594/6714/1432/6786/695/5294/1277/2534/5566/5336	15
hsa04140	Autophagy - animal	15/345	121/5827	0.00490061	0.00986883	0.00391338	5728/207/2475/1509/3091/5594/3630/598/596/5599/5894/5601/5588/5580/5566	15
hsa04072	Phospholipase D signaling pathway	15/345	135/5827	0.0131773	0.025128	0.00996424	2147/5155/207/2475/3576/1950/1956/5594/3630/551/5578/5894/5294/2534/5336	15
hsa04370	VEGF signaling pathway	14/345	52/5827	1.13e-06	4.22e-06	1.67e-06	4846/7422/207/3791/5743/5594/842/6714/1432/5578/5894/3315/5579/5336	14
hsa04150	mTOR signaling pathway	14/345	128/5827	0.018523	0.0344505	0.013661	7124/5728/207/2475/3479/5594/3630/2932/5578/1147/5894/3551/5579/7474	14
hsa04662	B cell receptor signaling pathway	13/345	75/5827	0.000389713	0.000998212	0.00039583	207/5594/2353/3725/2932/1147/695/4790/5894/5970/3551/5579/5336	13
hsa04215	Apoptosis - multiple species	12/345	29/5827	3.19e-08	1.5e-07	5.96e-08	836/841/842/54205/598/596/581/5599/332/8772/5601/578	12
hsa00330	Arginine and proline metabolism	12/345	39/5827	1.4e-06	5.11e-06	2.03e-06	4846/4843/4842/4129/4942/4128/4953/54498/217/383/223/5625	12
hsa04622	RIG-I-like receptor signaling pathway	12/345	65/5827	0.000356276	0.000920641	0.00036507	7124/3576/841/3627/5599/1432/1147/4790/5970/3551/8772/5601	12
hsa04211	Longevity regulating pathway	12/345	77/5827	0.00171142	0.00393493	0.00156036	7157/207/2475/3479/847/3630/5468/581/4790/5970/5566/9365	12
hsa01200	Carbon metabolism	12/345	105/5827	0.0206098	0.0380891	0.0151038	6392/6390/2271/6391/6389/2875/847/5096/35/5095/1373/3030	12
hsa00280	Valine, leucine and isoleucine degradation	11/345	42/5827	2.17e-05	6.47e-05	2.57e-05	5096/35/5095/3155/3712/3030/34/36/64087/217/223	11
hsa04610	Complement and coagulation cascades	11/345	76/5827	0.00475328	0.00963859	0.00382208	2147/2155/2159/2152/5327/5054/7056/5340/2158/5328/727	11
hsa00350	Tyrosine metabolism	10/345	32/5827	9.28e-06	2.95e-05	1.17e-05	7054/7299/4129/4128/2184/7173/6898/125/126/218	10
hsa00980	Metabolism of xenobiotics by cytochrome P450	10/345	51/5827	0.000669759	0.00168595	0.000668544	1544/2950/1565/2944/1543/1576/125/1571/126/218	10
hsa04923	Regulation of lipolysis in adipocytes	10/345	52/5827	0.000786509	0.00192992	0.00076529	207/5743/5742/3630/4878/154/134/153/5733/5566	10
hsa04924	Renin secretion	10/345	62/5827	0.00315479	0.00672408	0.00266636	776/1906/4878/154/116/3778/134/153/1907/5566	10
hsa01230	Biosynthesis of amino acids	10/345	63/5827	0.00355799	0.00747435	0.00296387	875/2875/5009/445/1373/4548/2752/6898/383/1491	10
hsa00220	Arginine biosynthesis	9/345	17/5827	1.29e-07	5.52e-07	2.19e-07	4846/4843/2875/5009/445/1373/4842/2752/383	9
hsa00270	Cysteine and methionine metabolism	9/345	43/5827	0.000754225	0.00186639	0.000740096	875/4548/1786/2937/1789/635/6898/1788/1491	9
hsa04929	GnRH secretion	9/345	60/5827	0.00814208	0.0159563	0.0063273	207/776/5594/6696/5578/5894/2100/5579/408	9
hsa00380	Tryptophan metabolism	8/345	35/5827	0.000798692	0.00194348	0.000770668	847/1544/4129/3030/4128/1543/217/223	8
hsa00071	Fatty acid degradation	8/345	41/5827	0.00237552	0.00529506	0.0020997	35/3030/34/36/217/125/223/126	8
hsa04623	Cytosolic DNA-sensing pathway	8/345	54/5827	0.0132524	0.025128	0.00996424	3569/3553/3627/834/1147/4790/5970/3551	8
hsa00410	beta-Alanine metabolism	7/345	30/5827	0.00149226	0.00348591	0.0013823	2571/35/3030/54498/217/223/218	7
hsa00260	Glycine, serine and threonine metabolism	7/345	33/5827	0.0026862	0.00585351	0.00232115	875/4129/4128/635/212/27232/1491	7
hsa04960	Aldosterone-regulated sodium reabsorption	7/345	35/5827	0.00381828	0.00796383	0.00315797	3479/5594/3630/5578/476/4306/5579	7
hsa04961	Endocrine and other factor-regulated calcium reabsorption	7/345	50/5827	0.026574	0.0476049	0.0188772	2099/5578/476/5579/7421/5566/9365	7
hsa00860	Porphyrin and chlorophyll metabolism	6/345	27/5827	0.00422241	0.00874429	0.00346745	3162/2058/210/7389/3145/212	6
hsa00340	Histidine metabolism	5/345	18/5827	0.00318833	0.00674633	0.00267519	4129/4128/217/223/218	5
hsa00250	Alanine, aspartate and glutamate metabolism	5/345	29/5827	0.0259075	0.0469876	0.0186324	2571/2875/445/1373/2752	5
hsa00360	Phenylalanine metabolism	4/345	16/5827	0.0124501	0.0239172	0.00948412	4129/4128/6898/218	4
hsa00591	Linoleic acid metabolism	4/345	20/5827	0.0275046	0.0486749	0.0193015	1544/246/1576/1571	4
