# Supplementary material for: Synergistic Network Pharmacology for Traditional Chinese Medicine Liangxue Tongyu Formula in Acute Intracerebral Hemorrhagic Stroke
Source: Neural Plast. 2021 Feb 26;2021:8874296. doi: 10.1155/2021/8874296 (PMC7936909; doi:10.1155/2021/8874296)
Supplement: Supplementary Materials — S1 Table. 517 compounds of 8 herbs in LXTYF collected from TCMSP and BATMAN-TCM database. S2 Table. 874 targets of the active ingredients obtained from the TCMSP. S3 Table. 149 targets of active components predicted from the SwissTargetPrediction database. S4 Table. 2315 targets relating to ICH collected from GAD, Genecards, and DisGeNET database. S5 Table. Topological parameters of component-target network. S6 Table. Proteins-proteins interaction information of LXTYF targets for AICH in STRING 11.0. S7 Table. Topological parameters of the PPI network. S8 Table. Results of putative targets for KEGG pathway enrichment analysis. S9 Table. Detailed information of 583 differentially expressed mRNAs identified between MGT and MG. S10 Table. Details of the Herb-Compound-Target-Pathway(H-C-T-P) network connection verified in RNA-seq. [file 8874296.f1.zip › Supplementary Table S1-S10/S9 Table.xlsx]

## Sheet: Sheet1
Table S9.583 differentially expressed mRNAs in LXTYF vs ICH groups
seq_id	rat gene	human gene	logFC(EG3/EG2)	p-value	FDR	regulate
ENSRNOG00000043819	——	——	-11.03	3.55e-05	0.0132	down
ENSRNOG00000047167	——	——	-10.5	8.49e-05	0.0245	down
ENSRNOG00000016275	Ttr	TTR	-9.87	2.36e-05	0.00912	down
ENSRNOG00000002151	LOC103693564	TAGLN3	-9.58	6.94e-40	1.37e-35	down
ENSRNOG00000060012	——	——	-8.8	0.000306	0.0661	down
ENSRNOG00000006178	Dync1h1	DYNC1H1	-7.28	4.16e-05	0.0148	down
ENSRNOG00000005932	Megf9	MEGF9	-7.1	1.6e-16	6.28e-13	down
ENSRNOG00000017431	RGD1304884	KIAA0513	-7.08	7.97e-05	0.0237	down
ENSRNOG00000016834	Wdr37	WDR37	-6.16	3.92e-05	0.0143	down
ENSRNOG00000000408	Gopc	GOPC	-6.11	3.06e-07	0.000273	down
ENSRNOG00000036826	Glycam1	——	-5.85	0.00127	0.17	down
ENSRNOG00000018089	Sra1	SRA1	-5.42	0.000659	0.11	down
ENSRNOG00000024918	Fam229b	FAM229B	-5.32	1.32e-08	1.85e-05	down
ENSRNOG00000005286	Coch	COCH	-5.3	0.000443	0.0845	down
ENSRNOG00000017560	Mdk	MDK	-5.29	0.00158	0.188	down
ENSRNOG00000016226	Rpp40	RPP40	-5.17	6.57e-07	0.000538	down
ENSRNOG00000003614	Mgat5	MGAT5	-5.17	0.0089	0.549	down
ENSRNOG00000043197	LOC688613	——	-5.07	0.00154	0.186	down
ENSRNOG00000021691	Ccdc92	CCDC92	-5.03	1.21e-05	0.00539	down
ENSRNOG00000008932	Ncapd3	NCAPD3	-5.02	4.83e-17	2.37e-13	down
ENSRNOG00000010475	Casp3	CASP3	-4.96	4.92e-06	0.00255	down
ENSRNOG00000049740	LOC102553099	NAA50	-4.87	0.00013	0.0351	down
ENSRNOG00000003472	Atp11c	ATP11C	-4.86	0.000163	0.0416	down
ENSRNOG00000004632	Pmch	PMCH	-4.75	0.0069	0.486	down
ENSRNOG00000037647	Ostm1	OSTM1	-4.72	0.0118	0.656	down
ENSRNOG00000017406	Atrnl1	ATRNL1	-4.71	0.00144	0.179	down
ENSRNOG00000006818	Arl6ip5	ARL6IP5	-4.67	0.00143	0.179	down
ENSRNOG00000001092	Kl	KL	-4.46	0.0175	0.834	down
ENSRNOG00000055567	Fmnl2	FMNL2	-4.39	2.31e-06	0.0013	down
ENSRNOG00000014969	Lzts2	LZTS2	-4.39	5.84e-05	0.0195	down
ENSRNOG00000054495	Cldn2	CLDN2	-4.38	0.00781	0.511	down
ENSRNOG00000019973	Arl3	ARL3	-4.33	0.00055	0.098	down
ENSRNOG00000001161	Gatc	GATC	-4.33	0.00117	0.16	down
ENSRNOG00000019760	Oxnad1	OXNAD1	-4.32	0.000168	0.0418	down
ENSRNOG00000003960	Tmem27	CLTRN	-4.22	0.00191	0.211	down
ENSRNOG00000020726	Sipa1	SIPA1	-4.16	3.62e-11	7.12e-08	down
ENSRNOG00000009022	LOC103692165	RTKN	-4.16	2.41e-05	0.00912	down
ENSRNOG00000047118	LOC683897	C6orf203	-4.14	9.2e-05	0.0258	down
ENSRNOG00000001205	Agpat3	AGPAT3	-4.08	7.2e-06	0.00345	down
ENSRNOG00000004161	Mtif2	MTIF2	-4.07	1.83e-05	0.00765	down
ENSRNOG00000016910	Ralgps1	RALGPS1	-4.05	8.8e-05	0.0251	down
ENSRNOG00000002585	Cul4b	CUL4B	-3.91	0.000741	0.119	down
ENSRNOG00000021140	Kcnk4	KCNK4	-3.9	0.00658	0.471	down
ENSRNOG00000042326	Smpdl3b	SMPDL3B	-3.87	0.00125	0.168	down
ENSRNOG00000042855	Ahdc1	AHDC1	-3.85	0.000278	0.0615	down
ENSRNOG00000020130	Arhgef1	ARHGEF1	-3.84	1.49e-06	0.00105	down
ENSRNOG00000023340	Tmem72	TMEM72	-3.82	0.0136	0.718	down
ENSRNOG00000003307	Gcdh	GCDH	-3.8	0.0108	0.628	down
ENSRNOG00000008548	LOC100360940	DIABLO	-3.71	0.00279	0.269	down
ENSRNOG00000028087	Sdhaf4	SDHAF4	-3.68	0.0168	0.812	down
ENSRNOG00000049751	Arid4b	ARID4B	-3.65	0.00253	0.248	down
ENSRNOG00000061270	Git1	GIT1	-3.64	0.0117	0.656	down
ENSRNOG00000005927	Cpsf6	CPSF6	-3.63	0.000487	0.0886	down
ENSRNOG00000039107	Mfrp	MFRP	-3.6	0.0396	1	down
ENSRNOG00000008734	Zmym2	ZMYM2	-3.56	0.0032	0.294	down
ENSRNOG00000017953	Gfod2	GFOD2	-3.53	0.001	0.144	down
ENSRNOG00000020624	Acadsb	ACADSB	-3.52	1.93e-06	0.00118	down
ENSRNOG00000023541	Ahctf1	AHCTF1	-3.52	0.000135	0.0355	down
ENSRNOG00000033134	Mef2c	MEF2C	-3.52	0.0125	0.685	down
ENSRNOG00000019918	Coasy	COASY	-3.51	0.0468	1	down
ENSRNOG00000033617	Krt26	KRT26	-3.5	0.0227	0.978	down
ENSRNOG00000011427	Hr	HR	-3.48	0.00131	0.172	down
ENSRNOG00000025185	Nup188	NUP188	-3.46	0.000868	0.133	down
ENSRNOG00000026891	AC093995.1	DSTN	-3.46	0.00172	0.198	down
ENSRNOG00000000262	Zfp821	ZNF821	-3.46	0.00244	0.246	down
ENSRNOG00000017512	Aldh3b1	ALDH3B1	-3.43	0.0302	1	down
ENSRNOG00000053932	Ddx6	DDX6	-3.41	5.21e-05	0.0177	down
ENSRNOG00000007527	Tm2d1	TM2D1	-3.4	0.00284	0.273	down
ENSRNOG00000049388	Prr32	PRR32	-3.38	0.00803	0.519	down
ENSRNOG00000010362	Anxa2	ANXA2	-3.37	0.0143	0.731	down
ENSRNOG00000008810	Nsmf	NSMF	-3.34	0.0171	0.82	down
ENSRNOG00000053205	Gabpa	GABPA	-3.32	0.000978	0.141	down
ENSRNOG00000005770	Sostdc1	SOSTDC1	-3.32	0.00323	0.296	down
ENSRNOG00000000172	Sqrdl	SQOR	-3.32	0.00726	0.496	down
ENSRNOG00000010806	Npvf	NPVF	-3.3	0.0117	0.656	down
ENSRNOG00000058898	Nedd4	NEDD4	-3.28	1.7e-07	0.000176	down
ENSRNOG00000029064	Zcchc4	ZCCHC4	-3.28	1.83e-06	0.00118	down
ENSRNOG00000031266	Siae	SIAE	-3.25	0.00363	0.317	down
ENSRNOG00000016790	Kmt5b	KMT5B	-3.22	0.000849	0.131	down
ENSRNOG00000026874	Zfp956	ZNF552	-3.21	1.44e-06	0.00105	down
ENSRNOG00000009288	Fgf14	FGF14	-3.21	0.0434	1	down
ENSRNOG00000013305	Atp2c1	ATP2C1	-3.19	0.0017	0.198	down
ENSRNOG00000003835	Slc43a2	SLC43A2	-3.18	4.91e-05	0.0169	down
ENSRNOG00000001299	Sun1	SUN1	-3.18	0.0128	0.694	down
ENSRNOG00000013128	Tmem179	TMEM179	-3.16	0.00644	0.471	down
ENSRNOG00000016849	Ppp2r5d	PPP2R5D	-3.12	0.000224	0.0524	down
ENSRNOG00000049593	Wbp11	——	-3.11	0.00294	0.279	down
ENSRNOG00000027901	Mrm1	MRM1	-3.08	0.0492	1	down
ENSRNOG00000019574	Cuedc2	CUEDC2	-3.06	0.00585	0.434	down
ENSRNOG00000052405	Cdh4	CDH4	-3.06	0.0232	0.987	down
ENSRNOG00000034102	Plk5	PLK5	-3.05	0.0279	1	down
ENSRNOG00000019229	Fbl	FBL	-3.04	0.0067	0.476	down
ENSRNOG00000006999	Wdr78	WDR78	-3.03	0.00409	0.344	down
ENSRNOG00000006235	Nell2	NELL2	-3.02	0.000668	0.11	down
ENSRNOG00000018400	Golm1	GOLM1	-3.02	0.012	0.661	down
ENSRNOG00000056343	Lats2	LATS2	-3.02	0.0385	1	down
ENSRNOG00000010378	Slc4a5	SLC4A5	-2.99	0.00827	0.531	down
ENSRNOG00000008362	Zfp775	——	-2.93	5.67e-06	0.00286	down
ENSRNOG00000001616	Senp7	SENP7	-2.93	0.000179	0.0435	down
ENSRNOG00000028243	Derl3	DERL3	-2.92	0.00199	0.215	down
ENSRNOG00000007886	Orm1	ORM1	-2.9	0.00931	0.564	down
ENSRNOG00000020822	Atp8b2	ATP8B2	-2.9	0.0158	0.776	down
ENSRNOG00000020742	Pcnx3	PCNX3	-2.85	2.02e-08	2.48e-05	down
ENSRNOG00000013934	St5	ST5	-2.85	0.000469	0.0877	down
ENSRNOG00000008182	Htra3	HTRA3	-2.85	0.0145	0.732	down
ENSRNOG00000046338	LOC100909824	ZNF780A	-2.84	0.00125	0.168	down
ENSRNOG00000059453	Fuk	FUK	-2.84	0.00217	0.228	down
ENSRNOG00000008704	Nlk	NLK	-2.83	0.000135	0.0355	down
ENSRNOG00000018153	Rbm5	RBM5	-2.78	0.0183	0.854	down
ENSRNOG00000014186	RGD1310257	ZSWIM9	-2.78	0.0199	0.903	down
ENSRNOG00000004754	Tc2n	TC2N	-2.75	0.00132	0.172	down
ENSRNOG00000001258	Snx8	SNX8	-2.74	0.00331	0.3	down
ENSRNOG00000017986	Zfp458	ZNF845	-2.73	0.00187	0.209	down
ENSRNOG00000004666	Prr5l	PRR5L	-2.71	0.018	0.845	down
ENSRNOG00000046594	Exoc7	EXOC7	-2.7	0.0185	0.862	down
ENSRNOG00000018018	Kcnip2	KCNIP2	-2.7	0.0263	1	down
ENSRNOG00000027229	Slc35d2	SLC35D2	-2.68	0.000435	0.0845	down
ENSRNOG00000001004	Ncor2	NCOR2	-2.67	0.000483	0.0886	down
ENSRNOG00000003837	Mif4gd	MIF4GD	-2.66	0.00335	0.302	down
ENSRNOG00000050417	AABR07006774.1	TBC1D12	-2.65	0.0354	1	down
ENSRNOG00000004280	Tcn2	TCN2	-2.64	0.0294	1	down
ENSRNOG00000016338	Fam92a	FAM92A	-2.63	0.0109	0.629	down
ENSRNOG00000045868	RGD1559588	——	-2.61	0.000167	0.0418	down
ENSRNOG00000024594	Fhdc1	FHDC1	-2.6	0.00223	0.231	down
ENSRNOG00000005307	Slc4a10	SLC4A10	-2.58	0.000468	0.0877	down
ENSRNOG00000016962	Neu2	NEU2	-2.56	0.0144	0.732	down
ENSRNOG00000000239	Ccl7	CCL7	-2.56	0.0355	1	down
ENSRNOG00000014693	Btbd6	BTBD6	-2.52	0.00669	0.476	down
ENSRNOG00000017564	Mib2	MIB2	-2.52	0.0113	0.645	down
ENSRNOG00000007755	Pm20d2	PM20D2	-2.51	0.00887	0.549	down
ENSRNOG00000001124	Rnft2	RNFT2	-2.5	0.00384	0.33	down
ENSRNOG00000042347	Zfp53	——	-2.46	0.000581	0.102	down
ENSRNOG00000038909	Pou3f3	POU3F3	-2.46	0.00393	0.333	down
ENSRNOG00000008741	Camsap2	CAMSAP2	-2.44	0.000763	0.121	down
ENSRNOG00000008124	Ints8	INTS8	-2.43	0.00214	0.226	down
ENSRNOG00000030515	Nfasc	NFASC	-2.43	0.0111	0.634	down
ENSRNOG00000033280	Pam	PAM	-2.43	0.0213	0.945	down
ENSRNOG00000033583	LOC100910577	——	-2.42	0.00675	0.477	down
ENSRNOG00000005243	Pop1	POP1	-2.42	0.0139	0.724	down
ENSRNOG00000015036	Ctgf	CCN2	-2.41	0.0202	0.912	down
ENSRNOG00000000175	Mier2	MIER2	-2.41	0.0368	1	down
ENSRNOG00000018166	Prkab2	PRKAB2	-2.4	0.0399	1	down
ENSRNOG00000009370	Tbkbp1	TBKBP1	-2.39	0.00647	0.471	down
ENSRNOG00000024964	Nufip2	NUFIP2	-2.37	0.0419	1	down
ENSRNOG00000021726	Tlr3	TLR3	-2.34	0.00022	0.0521	down
ENSRNOG00000020056	Fam134c	RETREG3	-2.34	0.00748	0.497	down
ENSRNOG00000002196	Ociad2	OCIAD2	-2.34	0.0094	0.564	down
ENSRNOG00000034022	Taf2	TAF2	-2.34	0.0423	1	down
ENSRNOG00000007748	Tex15	TEX15	-2.33	0.000431	0.0845	down
ENSRNOG00000049361	Gas7	GAS7	-2.33	0.0219	0.96	down
ENSRNOG00000015534	Cnep1r1	CNEP1R1	-2.32	0.0454	1	down
ENSRNOG00000039571	Glod5	GLOD5	-2.31	0.00489	0.388	down
ENSRNOG00000019902	Folr1	FOLR1	-2.3	0.018	0.845	down
ENSRNOG00000020543	Nosip	NOSIP	-2.3	0.034	1	down
ENSRNOG00000010428	Bahd1	BAHD1	-2.3	0.0343	1	down
ENSRNOG00000018938	Mkx	MKX	-2.28	0.0128	0.694	down
ENSRNOG00000015992	Ccl20	——	-2.27	0.0233	0.987	down
ENSRNOG00000022957	Ctxn3	CTXN3	-2.27	0.0358	1	down
ENSRNOG00000050100	LOC686911	EXOC1L	-2.24	0.0378	1	down
ENSRNOG00000032554	Scd4	——	-2.23	0.0175	0.834	down
ENSRNOG00000007818	Slc45a4	SLC45A4	-2.21	1.88e-06	0.00118	down
ENSRNOG00000001928	Il1rap	IL1RAP	-2.21	0.0129	0.695	down
ENSRNOG00000047174	Pcdha4	PCDHA4	-2.21	0.0135	0.718	down
ENSRNOG00000013869	Kcnj4	KCNJ4	-2.2	0.0189	0.872	down
ENSRNOG00000016044	Mab21l3	MAB21L3	-2.2	0.0321	1	down
ENSRNOG00000062002	Kcna3	KCNA3	-2.19	0.00911	0.558	down
ENSRNOG00000009968	Ercc8	ERCC8	-2.19	0.0396	1	down
ENSRNOG00000021840	Cped1	CPED1	-2.07	0.00067	0.11	down
ENSRNOG00000000386	Pbld1	PBLD	-2.06	0.00548	0.421	down
ENSRNOG00000024636	Gpr85	GPR85	-2.04	0.0135	0.717	down
ENSRNOG00000039740	Cenpk	CENPK	-2.04	0.0152	0.752	down
ENSRNOG00000061153	Hrh3	HRH3	-2.03	0.00732	0.496	down
ENSRNOG00000008902	Pon1	PON1	-2.03	0.0151	0.752	down
ENSRNOG00000019301	Lipm	LIPM	-2.02	0.0228	0.978	down
ENSRNOG00000024140	Sft2d1	SFT2D1	-2.01	0.0386	1	down
ENSRNOG00000004642	Lmx1a	LMX1A	-1.99	0.00172	0.198	down
ENSRNOG00000010141	Ttll1	TTLL1	-1.99	0.00569	0.427	down
ENSRNOG00000015173	Mbtps1	MBTPS1	-1.98	0.0406	1	down
ENSRNOG00000021521	Chst5	——	-1.97	0.0104	0.606	down
ENSRNOG00000009548	Fpgt	FPGT	-1.96	0.0086	0.542	down
ENSRNOG00000022164	Zscan2	ZSCAN2	-1.96	0.0315	1	down
ENSRNOG00000001821	Adipoq	ADIPOQ	-1.95	0.000424	0.0845	down
ENSRNOG00000017941	Optn	OPTN	-1.95	0.00626	0.461	down
ENSRNOG00000008560	Ccdc30	CCDC30	-1.95	0.0274	1	down
ENSRNOG00000000614	Bicc1	BICC1	-1.95	0.04	1	down
ENSRNOG00000008533	Ago2	AGO2	-1.94	0.00696	0.487	down
ENSRNOG00000011852	Myo6	MYO6	-1.94	0.0277	1	down
ENSRNOG00000047933	Phykpl	PHYKPL	-1.93	0.0143	0.732	down
ENSRNOG00000001769	Tnk2	TNK2	-1.93	0.0182	0.852	down
ENSRNOG00000008098	Lrrc4	LRRC4	-1.93	0.0357	1	down
ENSRNOG00000050378	Pcdha4	PCDHA3	-1.92	0.0278	1	down
ENSRNOG00000027103	Gpr151	GPR151	-1.91	0.00944	0.564	down
ENSRNOG00000003946	Tor1aip1	TOR1AIP1	-1.87	0.0214	0.949	down
ENSRNOG00000014585	Cfap53	——	-1.86	0.0118	0.656	down
ENSRNOG00000004089	Enpp2	ENPP2	-1.86	0.0338	1	down
ENSRNOG00000049331	RGD1559588	——	-1.83	0.000811	0.127	down
ENSRNOG00000007440	Dzank1	DZANK1	-1.83	0.00487	0.388	down
ENSRNOG00000036819	Hspb9	HSPB9	-1.81	0.0292	1	down
ENSRNOG00000001259	Cux2	CUX2	-1.8	0.0163	0.792	down
ENSRNOG00000020159	Dalrd3	DALRD3	-1.8	0.0363	1	down
ENSRNOG00000000510	Clps	CLPS	-1.79	0.00289	0.276	down
ENSRNOG00000021867	AABR07009508.1	MRPL42	-1.79	0.00863	0.542	down
ENSRNOG00000020514	Sox6	SOX6	-1.79	0.0116	0.656	down
ENSRNOG00000007921	Hnrnpm	——	-1.78	0.0252	1	down
ENSRNOG00000006776	Smyd1	SMYD1	-1.78	0.0269	1	down
ENSRNOG00000001227	Adarb1	ADARB1	-1.76	0.0103	0.601	down
ENSRNOG00000010533	Arfip1	ARFIP1	-1.75	0.0102	0.596	down
ENSRNOG00000004709	Foxn3	FOXN3	-1.73	0.0312	1	down
ENSRNOG00000025930	Chst13	CHST13	-1.72	0.000682	0.111	down
ENSRNOG00000006905	Hectd1	HECTD1	-1.7	0.0361	1	down
ENSRNOG00000040052	RT1-M6-2	——	-1.64	0.00846	0.537	down
ENSRNOG00000005765	Ap4s1	AP4S1	-1.63	0.00559	0.423	down
ENSRNOG00000002977	Ttc19	TTC19	-1.63	0.0141	0.725	down
ENSRNOG00000006570	Plekhg3	PLEKHG3	-1.6	0.00327	0.297	down
ENSRNOG00000022877	Poldip3	POLDIP3	-1.6	0.00485	0.388	down
ENSRNOG00000014149	Npy1r	NPY1R	-1.6	0.0427	1	down
ENSRNOG00000004180	Fam19a2	FAM19A2	-1.56	0.011	0.634	down
ENSRNOG00000059659	Zfand3	ZFAND3	-1.54	0.00558	0.423	down
ENSRNOG00000005129	Dtx3	DTX3	-1.54	0.0247	1	down
ENSRNOG00000002285	Fam122b	FAM122B	-1.53	0.00193	0.211	down
ENSRNOG00000012090	Slc16a8	SLC16A8	-1.53	0.0265	1	down
ENSRNOG00000016398	Clstn1	CLSTN1	-1.53	0.036	1	down
ENSRNOG00000050661	Zfp647	ZNF250	-1.52	0.0236	0.994	down
ENSRNOG00000009590	Stox2	STOX2	-1.52	0.0353	1	down
ENSRNOG00000028721	Otor	OTOR	-1.49	0.014	0.725	down
ENSRNOG00000011400	Ralyl	RALYL	-1.49	0.0245	1	down
ENSRNOG00000000885	Auts2	AUTS2	-1.46	0.0232	0.987	down
ENSRNOG00000032626	Mmp3	MMP3	-1.45	0.000626	0.108	down
ENSRNOG00000022060	Magi1	MAGI1	-1.43	0.00277	0.268	down
ENSRNOG00000043048	Zfp951	——	-1.43	0.00739	0.496	down
ENSRNOG00000040120	Bhmt2	BHMT2	-1.41	0.00445	0.366	down
ENSRNOG00000019277	Vdac3	VDAC3	-1.41	0.0233	0.987	down
ENSRNOG00000003435	Mcf2	MCF2	-1.39	0.0022	0.23	down
ENSRNOG00000010655	Mttp	MTTP	-1.37	0.0146	0.733	down
ENSRNOG00000017917	Cdhr2	CDHR2	-1.36	0.0105	0.611	down
ENSRNOG00000020733	Camp	CAMP	-1.36	0.0237	0.995	down
ENSRNOG00000060970	Tnmd	TNMD	-1.35	0.00895	0.55	down
ENSRNOG00000054900	Pih1d3	PIH1D3	-1.34	0.0316	1	down
ENSRNOG00000048365	LOC100911625	ENO2	-1.33	0.0358	1	down
ENSRNOG00000058664	Usp9y	USP9Y	-1.32	0.00316	0.293	down
ENSRNOG00000047546	Gas2l2	GAS2L2	-1.32	0.0159	0.776	down
ENSRNOG00000006831	Pgr	PGR	-1.31	0.00306	0.288	down
ENSRNOG00000014887	Homez	HOMEZ	-1.31	0.00749	0.497	down
ENSRNOG00000054763	LOC108348322	GAS2L2	-1.31	0.018	0.845	down
ENSRNOG00000027006	Hnrnpa3	——	-1.31	0.0491	1	down
ENSRNOG00000029813	Hmgb1	——	-1.3	0.00632	0.463	down
ENSRNOG00000050105	LOC103689942	——	-1.29	0.0295	1	down
ENSRNOG00000050413	Samd15	——	-1.28	0.0253	1	down
ENSRNOG00000037923	Dmrtc1c1	——	-1.26	0.00794	0.517	down
ENSRNOG00000038559	AABR07052431.1	——	-1.25	0.0452	1	down
ENSRNOG00000051015	Cd70	——	-1.24	0.0303	1	down
ENSRNOG00000005788	Cdk5rap2	CDK5RAP2	-1.24	0.0458	1	down
ENSRNOG00000046222	Ceacam4	——	-1.23	0.0295	1	down
ENSRNOG00000012742	Irx2	IRX2	-1.23	0.0377	1	down
ENSRNOG00000029318	Tyrp1	TYRP1	-1.22	0.00556	0.423	down
ENSRNOG00000057443	LOC497963	NOS2	-1.22	0.0149	0.745	down
ENSRNOG00000015248	Abca12	ABCA12	-1.21	0.00388	0.332	down
ENSRNOG00000018480	Capn9	CAPN9	-1.2	0.0145	0.732	down
ENSRNOG00000003496	Tbc1d9	TBC1D9	-1.18	0.0284	1	down
ENSRNOG00000039698	Prss22	PRSS22	-1.17	0.0491	1	down
ENSRNOG00000024794	Senp5	SENP5	-1.16	0.0246	1	down
ENSRNOG00000013514	Maf1	MAF1	-1.15	0.0416	1	down
ENSRNOG00000046850	NEWGENE——621438	THPO	-1.15	0.0418	1	down
ENSRNOG00000020980	AABR07006278.1	——	-1.14	0.0142	0.73	down
ENSRNOG00000009341	Hivep3	HIVEP3	-1.13	0.00496	0.39	down
ENSRNOG00000005798	Cav3	CAV3	-1.13	0.0276	1	down
ENSRNOG00000012473	Cflar	CFLAR	-1.11	0.0245	1	down
ENSRNOG00000052613	LOC103689977	CASP6	-1.11	0.0325	1	down
ENSRNOG00000014427	Chrnb4	CHRNB4	-1.08	0.0254	1	down
ENSRNOG00000056984	Baz2b	BAZ2B	-1.06	0.0174	0.832	down
ENSRNOG00000033101	Myo18a	MYO18A	-1.06	0.0283	1	down
ENSRNOG00000011887	RGD1307929	KIAA0100	-1.04	0.00861	0.542	down
ENSRNOG00000026051	——	——	-1.04	0.0343	1	down
ENSRNOG00000000564	Tbata	TBATA	-1.02	0.00654	0.471	down
ENSRNOG00000014037	Dcun1d3	DCUN1D3	-1.01	0.0495	1	down
ENSRNOG00000060386	——	——	9.68	8.09e-05	0.0237	up
ENSRNOG00000006375	Vdac1	VDAC1	9.11	1.6e-08	2.09e-05	up
ENSRNOG00000028733	Prkar1b	PRKAR1B	8.66	1.64e-06	0.00111	up
ENSRNOG00000008374	Nipsnap1	NIPSNAP1	7.19	4.38e-18	2.87e-14	up
ENSRNOG00000025383	Pdha1	PDHA1	6.98	5.87e-06	0.00288	up
ENSRNOG00000001492	Slc8a2	SLC8A2	6.33	1.32e-18	1.3e-14	up
ENSRNOG00000027300	Ttc7b	TTC7B	6.15	1.07e-06	0.000811	up
ENSRNOG00000009474	Ddx42	DDX42	6.13	1.13e-11	2.78e-08	up
ENSRNOG00000003742	Cdkl5	CDKL5	6.06	0.00016	0.0413	up
ENSRNOG00000000133	Txndc15	TXNDC15	5.91	0.000377	0.0789	up
ENSRNOG00000017505	Npepo	C9orf3	5.78	3.38e-14	1.11e-10	up
ENSRNOG00000047185	——	——	5.73	0.000656	0.11	up
ENSRNOG00000017311	Me3	ME3	5.61	9.88e-11	1.62e-07	up
ENSRNOG00000013152	Arhgap10	ARHGAP10	5.5	5.03e-11	8.99e-08	up
ENSRNOG00000025539	Vps13a	VPS13A	5.49	3.54e-09	5.36e-06	up
ENSRNOG00000045586	——	——	5.48	0.00415	0.347	up
ENSRNOG00000045554	LOC102551901	——	5.38	6.5e-05	0.0206	up
ENSRNOG00000022681	RGD1561113	C9orf16	5.2	0.00353	0.312	up
ENSRNOG00000021106	Gramd1a	GRAMD1A	5.16	2.13e-06	0.00125	up
ENSRNOG00000047350	LOC100909505	GNS	5.11	7.83e-06	0.00366	up
ENSRNOG00000018149	Smarca5	SMARCA5	4.97	7.49e-05	0.023	up
ENSRNOG00000029423	AABR07052519.1	——	4.97	0.00157	0.188	up
ENSRNOG00000005960	RGD1311744	VWA5A	4.87	0.000322	0.0688	up
ENSRNOG00000008992	Grik3	GRIK3	4.86	1.98e-11	4.33e-08	up
ENSRNOG00000004402	Lpgat1	LPGAT1	4.85	0.00806	0.52	up
ENSRNOG00000004099	R3hdm1	R3HDM1	4.76	1.96e-07	0.000192	up
ENSRNOG00000055843	Zik1	ZIK1	4.64	1.48e-05	0.00648	up
ENSRNOG00000042560	Bag4	BAG4	4.64	0.00251	0.248	up
ENSRNOG00000007688	Sms	SMS	4.62	0.000938	0.139	up
ENSRNOG00000018450	Slc25a22	SLC25A22	4.61	0.00108	0.153	up
ENSRNOG00000020009	Npas4	NPAS4	4.57	0.00464	0.377	up
ENSRNOG00000025592	Tspan31	TSPAN31	4.54	2.2e-05	0.00884	up
ENSRNOG00000027487	Trim28	TRIM28	4.54	0.00109	0.153	up
ENSRNOG00000045770	Hira	HIRA	4.5	2.16e-06	0.00125	up
ENSRNOG00000017060	Ryr2	RYR2	4.5	0.00431	0.357	up
ENSRNOG00000003670	Sumo2	——	4.49	0.0477	1	up
ENSRNOG00000007551	Patj	PATJ	4.36	9.75e-07	0.000767	up
ENSRNOG00000002013	Sidt1	SIDT1	4.35	1.57e-12	4.42e-09	up
ENSRNOG00000029876	Gucy1a2	GUCY1A2	4.33	0.000553	0.098	up
ENSRNOG00000046991	RGD1565472	TMEM127	4.31	0.00526	0.409	up
ENSRNOG00000048982	LOC100912282	CALCOCO1	4.25	0.000647	0.11	up
ENSRNOG00000024924	Cep19	CEP19	4.25	0.00151	0.184	up
ENSRNOG00000009402	Rabgap1	RABGAP1	4.23	2.92e-06	0.00159	up
ENSRNOG00000002212	Hsd17b13	HSD17B13	4.14	0.000265	0.0599	up
ENSRNOG00000051707	——	——	4.09	0.00659	0.471	up
ENSRNOG00000013078	Zcchc7	ZCCHC7	4.01	0.00189	0.21	up
ENSRNOG00000004200	Sybu	SYBU	3.96	0.0124	0.68	up
ENSRNOG00000025317	Gpatch11	GPATCH11	3.95	0.00113	0.156	up
ENSRNOG00000054457	——	——	3.92	0.0397	1	up
ENSRNOG00000060031	——	SNORD35A	3.89	0.0447	1	up
ENSRNOG00000006645	Ryr3	RYR3	3.88	2.05e-07	0.000192	up
ENSRNOG00000020744	Adar	ADAR	3.88	0.000926	0.138	up
ENSRNOG00000055661	——	——	3.8	0.00019	0.0456	up
ENSRNOG00000004076	Pms1	PMS1	3.76	0.00205	0.219	up
ENSRNOG00000018039	Sncb	SNCB	3.73	0.00275	0.267	up
ENSRNOG00000001368	Rph3a	RPH3A	3.69	0.00112	0.156	up
ENSRNOG00000019965	Tgfb1i1	TGFB1I1	3.68	6.2e-05	0.02	up
ENSRNOG00000015848	Etfrf1	ETFRF1	3.68	0.017	0.819	up
ENSRNOG00000054551	——	——	3.65	0.0118	0.656	up
ENSRNOG00000048213	——	——	3.65	0.0134	0.717	up
ENSRNOG00000016011	Plekhg1	PLEKHG1	3.62	3.09e-06	0.00164	up
ENSRNOG00000007515	Kif3a	KIF3A	3.62	0.000442	0.0845	up
ENSRNOG00000016010	Mul1	MUL1	3.57	0.00186	0.209	up
ENSRNOG00000054614	AABR07002779.1	MARCKSL1	3.55	0.0087	0.543	up
ENSRNOG00000060185	LOC103690317	KANSL2	3.51	0.0155	0.766	up
ENSRNOG00000010488	Zmiz1	ZMIZ1	3.5	0.0096	0.57	up
ENSRNOG00000020456	Nucb2	NUCB2	3.49	0.000431	0.0845	up
ENSRNOG00000027711	Usp32	USP32	3.47	0.0152	0.752	up
ENSRNOG00000021441	Reln	RELN	3.45	0.00937	0.564	up
ENSRNOG00000003717	Cnih4	CNIH4	3.44	0.0004	0.0827	up
ENSRNOG00000008725	Slc37a3	——	3.43	0.00175	0.199	up
ENSRNOG00000000916	Katnal1	KATNAL1	3.43	0.00252	0.248	up
ENSRNOG00000011592	Lrp10	LRP10	3.39	0.00944	0.564	up
ENSRNOG00000015597	LOC100125364	C6orf120	3.38	0.000503	0.0908	up
ENSRNOG00000049298	LOC100909595	——	3.37	0.0025	0.248	up
ENSRNOG00000055000	Zkscan3	ZKSCAN4	3.33	0.000125	0.0341	up
ENSRNOG00000005015	Rabep1	RABEP1	3.33	0.00548	0.421	up
ENSRNOG00000008815	Fbxo46	FBXO46	3.32	0.000178	0.0435	up
ENSRNOG00000011667	Fastk	FASTK	3.3	4.9e-07	0.000419	up
ENSRNOG00000026180	Letm2	LETM2	3.3	1.13e-05	0.00519	up
ENSRNOG00000020140	Pigq	PIGQ	3.3	4.23e-05	0.0148	up
ENSRNOG00000005411	Aftph	AFTPH	3.29	1.77e-05	0.00757	up
ENSRNOG00000023688	Drd1	DRD1	3.29	0.00185	0.209	up
ENSRNOG00000003846	Pitpna	PITPNA	3.27	0.00372	0.324	up
ENSRNOG00000047379	Zfp14	ZFP14	3.26	0.000237	0.0549	up
ENSRNOG00000020804	Smarcc1	SMARCC1	3.25	0.00164	0.191	up
ENSRNOG00000016444	——	——	3.25	0.00376	0.326	up
ENSRNOG00000000605	Hs3st5	HS3ST5	3.23	1.37e-07	0.00015	up
ENSRNOG00000060769	Hist1h2bd	HIST1H2BE	3.23	0.00111	0.156	up
ENSRNOG00000011154	Adgrf5	ADGRF5	3.21	8.09e-08	9.36e-05	up
ENSRNOG00000000665	Pitpnb	PITPNB	3.21	0.0253	1	up
ENSRNOG00000050317	Uhrf1bp1l	UHRF1BP1L	3.19	0.000333	0.0704	up
ENSRNOG00000007325	Usp28	USP28	3.19	0.00242	0.245	up
ENSRNOG00000059347	Rbmxl1b	——	3.18	0.0367	1	up
ENSRNOG00000024349	Cbarp	——	3.17	0.00338	0.302	up
ENSRNOG00000003882	Cep350	CEP350	3.14	0.00363	0.317	up
ENSRNOG00000056301	——	——	3.12	0.0207	0.928	up
ENSRNOG00000016213	Ssbp2	SSBP2	3.1	0.000404	0.0827	up
ENSRNOG00000004484	Commd5	COMMD5	3.08	0.00175	0.199	up
ENSRNOG00000020723	Pten	PTEN	3.08	0.00764	0.504	up
ENSRNOG00000057009	LOC103693189	——	3.08	0.0187	0.869	up
ENSRNOG00000000463	Col11a2	COL11A2	3.08	0.0259	1	up
ENSRNOG00000046242	Klf7	——	3.07	0.00163	0.191	up
ENSRNOG00000026447	Disp3	DISP3	3.06	8.09e-05	0.0237	up
ENSRNOG00000015719	Egr4	EGR4	3.06	0.00162	0.191	up
ENSRNOG00000035409	——	——	3.05	0.0147	0.738	up
ENSRNOG00000012364	Prickle2	PRICKLE2	3.04	0.0252	1	up
ENSRNOG00000024663	Fkbp15	FKBP15	3.03	6.2e-05	0.02	up
ENSRNOG00000045570	LOC288978	C2orf76	3.02	0.000304	0.0661	up
ENSRNOG00000046667	Fosb	FOSB	3.01	1.89e-05	0.00775	up
ENSRNOG00000060495	——	——	2.99	0.0332	1	up
ENSRNOG00000015068	Il11ra1	IL11RA	2.98	0.00829	0.531	up
ENSRNOG00000033940	Adgrl4	ADGRL4	2.96	0.00192	0.211	up
ENSRNOG00000001489	Tbp	TBP	2.95	0.0138	0.718	up
ENSRNOG00000015441	Il4r	IL4R	2.95	0.0415	1	up
ENSRNOG00000033893	Cacna1h	CACNA1H	2.94	0.00891	0.549	up
ENSRNOG00000002001	Itsn1	ITSN1	2.93	0.00133	0.172	up
ENSRNOG00000012475	Prr5	PRR5	2.92	0.000641	0.11	up
ENSRNOG00000019964	Taok2	TAOK2	2.92	0.00479	0.386	up
ENSRNOG00000019243	Glb1l	GLB1L	2.92	0.00732	0.496	up
ENSRNOG00000029996	LOC103691939	——	2.9	0.0138	0.718	up
ENSRNOG00000060709	AABR07046866.1	——	2.89	0.0423	1	up
ENSRNOG00000008892	Parp2	PARP2	2.87	0.0039	0.332	up
ENSRNOG00000008709	Arhgap32	ARHGAP32	2.83	0.000973	0.141	up
ENSRNOG00000012918	Mtmr6	MTMR6	2.83	0.0453	1	up
ENSRNOG00000017915	Dvl2	DVL2	2.82	0.00152	0.184	up
ENSRNOG00000016498	——	——	2.81	0.0129	0.695	up
ENSRNOG00000001156	Msi1	MSI1	2.81	0.0252	1	up
ENSRNOG00000000640	Egr2	EGR2	2.8	0.00147	0.18	up
ENSRNOG00000031485	Dpp3	DPP3	2.8	0.00318	0.294	up
ENSRNOG00000029260	Pitpnm2	PITPNM2	2.78	0.00471	0.381	up
ENSRNOG00000005045	Ppp2r5e	PPP2R5E	2.75	0.000883	0.134	up
ENSRNOG00000051948	Hcfc1	HCFC1	2.66	0.00782	0.511	up
ENSRNOG00000019438	Rnf31	RNF31	2.65	0.00655	0.471	up
ENSRNOG00000012037	Galnt7	GALNT7	2.65	0.0123	0.675	up
ENSRNOG00000008659	Arhgap21	ARHGAP21	2.63	0.0384	1	up
ENSRNOG00000008929	Aebp2	AEBP2	2.63	0.0468	1	up
ENSRNOG00000060410	Pcdh1	PCDH1	2.62	0.000101	0.0279	up
ENSRNOG00000047526	Zfp526	ZNF526	2.62	0.0312	1	up
ENSRNOG00000006285	Tlk2	TLK2	2.61	0.0217	0.955	up
ENSRNOG00000013160	Sash1	SASH1	2.6	0.00747	0.497	up
ENSRNOG00000004466	Fam210b	FAM210B	2.58	0.00461	0.376	up
ENSRNOG00000004951	Kif16b	KIF16B	2.56	0.00074	0.119	up
ENSRNOG00000016391	LOC100912163	ARID4B	2.56	0.0159	0.776	up
ENSRNOG00000000599	Lama4	LAMA4	2.54	0.00131	0.172	up
ENSRNOG00000031174	Arnt	ARNT	2.54	0.00579	0.431	up
ENSRNOG00000007690	Cmpk2	CMPK2	2.54	0.00652	0.471	up
ENSRNOG00000009033	Cntn2	CNTN2	2.53	0.00868	0.543	up
ENSRNOG00000022431	Zfp867	ZNF433	2.53	0.0203	0.916	up
ENSRNOG00000002051	Synj1	SYNJ1	2.52	0.00132	0.172	up
ENSRNOG00000043465	Arc	ARC	2.49	0.000258	0.059	up
ENSRNOG00000018110	Svil	SVIL	2.49	0.000272	0.0608	up
ENSRNOG00000002142	Cds1	CDS1	2.49	0.0116	0.656	up
ENSRNOG00000011111	Cipc	CIPC	2.48	0.000772	0.121	up
ENSRNOG00000024492	Ap1ar	AP1AR	2.48	0.0197	0.9	up
ENSRNOG00000011646	Rem2	REM2	2.45	0.0318	1	up
ENSRNOG00000007607	Nr4a1	NR4A1	2.43	0.000873	0.133	up
ENSRNOG00000011967	Nphp4	NPHP4	2.43	0.00339	0.302	up
ENSRNOG00000001730	Acap2	ACAP2	2.42	0.00429	0.357	up
ENSRNOG00000004212	Fbxw9	FBXW9	2.42	0.0331	1	up
ENSRNOG00000011216	Tbl1xr1	TBL1XR1	2.41	0.00121	0.166	up
ENSRNOG00000007682	Gria3	GRIA3	2.41	0.0137	0.718	up
ENSRNOG00000006870	Mtdh	MTDH	2.4	0.00577	0.431	up
ENSRNOG00000020694	Icam5	ICAM5	2.38	0.00339	0.302	up
ENSRNOG00000001245	Pcbp3	——	2.38	0.0279	1	up
ENSRNOG00000010815	Elf2	ELF2	2.36	0.0031	0.291	up
ENSRNOG00000003949	Phka2	PHKA2	2.36	0.0198	0.901	up
ENSRNOG00000023381	Proca1	PROCA1	2.35	0.0024	0.245	up
ENSRNOG00000027906	Ankrd11	ANKRD11	2.35	0.00245	0.246	up
ENSRNOG00000023601	Elavl4	ELAVL4	2.33	0.0411	1	up
ENSRNOG00000017489	Gse1	GSE1	2.32	0.00136	0.173	up
ENSRNOG00000005698	Ndufa5	NDUFA5	2.32	0.0417	1	up
ENSRNOG00000014775	Nol4	NOL4	2.28	0.0129	0.694	up
ENSRNOG00000023760	Plekhm3	PLEKHM3	2.27	0.000473	0.0877	up
ENSRNOG00000045960	——	PCDHA2	2.27	0.01	0.591	up
ENSRNOG00000020702	Cyb561a3	CYB561A3	2.27	0.0239	1	up
ENSRNOG00000016246	Tshz1	TSHZ1	2.26	0.00708	0.49	up
ENSRNOG00000025181	Pigu	PIGU	2.26	0.0251	1	up
ENSRNOG00000022804	Foxp4	FOXP4	2.26	0.0299	1	up
ENSRNOG00000045695	NEWGENE——1559832	RLIM	2.21	0.032	1	up
ENSRNOG00000001450	Nsun5	NSUN5	2.2	0.029	1	up
ENSRNOG00000012148	Trio	TRIO	2.19	0.00799	0.518	up
ENSRNOG00000020901	S1pr5	S1PR5	2.19	0.0281	1	up
ENSRNOG00000010752	Tmem41b	TMEM41B	2.18	0.00725	0.496	up
ENSRNOG00000056617	Zswim8	ZSWIM8	2.18	0.0197	0.901	up
ENSRNOG00000032441	Pan2	PAN2	2.17	0.0194	0.891	up
ENSRNOG00000009411	Chn2	CHN2	2.16	0.0336	1	up
ENSRNOG00000029178	Abcc5	ABCC5	2.15	6.81e-05	0.0213	up
ENSRNOG00000054806	LOC108348323	CDKL3	2.15	0.0179	0.845	up
ENSRNOG00000014368	Eif4g3	EIF4G3	2.15	0.023	0.985	up
ENSRNOG00000007099	S100pbp	S100PBP	2.15	0.03	1	up
ENSRNOG00000016886	Rnf25	RNF25	2.15	0.0409	1	up
ENSRNOG00000048894	LOC103690038	ZNF569	2.14	0.00312	0.291	up
ENSRNOG00000018063	Rad1	RAD1	2.14	0.0116	0.656	up
ENSRNOG00000016122	Hmgcr	HMGCR	2.13	0.00134	0.172	up
ENSRNOG00000061004	Asphd2	ASPHD2	2.13	0.0216	0.951	up
ENSRNOG00000001313	Gnaz	GNAZ	2.12	0.0225	0.978	up
ENSRNOG00000032546	Dot1l	DOT1L	2.11	0.0309	1	up
ENSRNOG00000050630	AABR07070043.1	——	2.11	0.0431	1	up
ENSRNOG00000024549	Mum1	PWWP3A	2.08	0.0198	0.901	up
ENSRNOG00000055892	AABR07043395.1	——	2.07	0.043	1	up
ENSRNOG00000046527	Phf20l1	PHF20L1	2.06	0.00718	0.495	up
ENSRNOG00000017940	Rere	RERE	2.06	0.0429	1	up
ENSRNOG00000019422	Egr1	EGR1	2.05	0.000967	0.141	up
ENSRNOG00000020541	Nprl3	NPRL3	2.05	0.0258	1	up
ENSRNOG00000057089	LOC103691744	CTH	2.04	0.0101	0.595	up
ENSRNOG00000050497	Znf7	ZNF7	2.03	0.00382	0.329	up
ENSRNOG00000028302	LOC103694876	SMARCB1	2.03	0.004	0.338	up
ENSRNOG00000057404	Slc47a1	SLC47A1	2.03	0.00928	0.564	up
ENSRNOG00000046990	Cpne1	CPNE1	2.03	0.0365	1	up
ENSRNOG00000031290	Trappc3l	TRAPPC3L	2.02	0.023	0.984	up
ENSRNOG00000004841	Akap6	AKAP6	2.01	0.00203	0.218	up
ENSRNOG00000002525	Ptgs2	PTGS2	2	0.00137	0.173	up
ENSRNOG00000052111	Sugp1	——	2	0.0235	0.99	up
ENSRNOG00000002358	Scpep1	SCPEP1	2	0.0284	1	up
ENSRNOG00000025764	AC128848.1	MT1A	1.98	0.0476	1	up
ENSRNOG00000020770	Arl4d	ARL4D	1.96	0.0026	0.254	up
ENSRNOG00000012653	Ppp1r13b	PPP1R13B	1.95	0.0138	0.718	up
ENSRNOG00000057542	Zfp488	ZNF488	1.95	0.0306	1	up
ENSRNOG00000043037	Zfp770	ZNF770	1.94	0.017	0.819	up
ENSRNOG00000037709	Armcx1	ARMCX1	1.94	0.0491	1	up
ENSRNOG00000034191	Fmo1	FMO1	1.93	0.000911	0.137	up
ENSRNOG00000021145	Gpr137	GPR137	1.93	0.0327	1	up
ENSRNOG00000038004	Zfp804a	ZNF804A	1.89	0.018	0.845	up
ENSRNOG00000039777	Ttf1	TTF1	1.89	0.0302	1	up
ENSRNOG00000013231	Ptafr	PTAFR	1.88	0.0159	0.776	up
ENSRNOG00000004032	Tmem94	TMEM94	1.88	0.0192	0.883	up
ENSRNOG00000003853	Scoc	SCOC	1.88	0.0403	1	up
ENSRNOG00000015582	Me2	ME2	1.88	0.0478	1	up
ENSRNOG00000018748	Slc16a11	SLC16A11	1.87	0.00145	0.179	up
ENSRNOG00000018616	Cdc42ep5	CDC42EP5	1.87	0.0494	1	up
ENSRNOG00000022845	Cep70	CEP70	1.86	0.00728	0.496	up
ENSRNOG00000050995	AABR07002774.2	——	1.86	0.04	1	up
ENSRNOG00000026392	Cdh12	CDH12	1.86	0.0419	1	up
ENSRNOG00000018113	Anlnl1	ANLN	1.84	0.00707	0.49	up
ENSRNOG00000021984	Rgs7	RGS7	1.83	0.031	1	up
ENSRNOG00000011059	Ttbk2	TTBK2	1.81	0.0319	1	up
ENSRNOG00000018914	Napg	NAPG	1.8	0.0152	0.752	up
ENSRNOG00000026979	RGD1561444	KIAA0895	1.8	0.0485	1	up
ENSRNOG00000013064	Lrp8	LRP8	1.79	2.37e-05	0.00912	up
ENSRNOG00000010771	Pkd1	PKD1	1.79	0.0287	1	up
ENSRNOG00000016688	Ston1	STON1	1.77	0.00706	0.49	up
ENSRNOG00000011573	Csad	CSAD	1.76	0.0343	1	up
ENSRNOG00000011586	LOC100909712	CCNL1	1.75	0.0244	1	up
ENSRNOG00000008015	Fos	FOS	1.73	0.0144	0.732	up
ENSRNOG00000042838	Junb	JUNB	1.71	0.00224	0.231	up
ENSRNOG00000011112	Fam161b	FAM161B	1.71	0.0137	0.718	up
ENSRNOG00000061519	Asap2	ASAP2	1.71	0.0329	1	up
ENSRNOG00000009102	Fermt2	FERMT2	1.71	0.035	1	up
ENSRNOG00000020485	Vav3	VAV3	1.71	0.0379	1	up
ENSRNOG00000005234	Gxylt1	GXYLT1	1.68	0.0474	1	up
ENSRNOG00000000593	Rev3l	REV3L	1.67	0.0298	1	up
ENSRNOG00000012953	Arsa	ARSA	1.67	0.0391	1	up
ENSRNOG00000032659	Plcl1	PLCL1	1.64	0.0396	1	up
ENSRNOG00000009054	Elmod1	ELMOD1	1.64	0.0479	1	up
ENSRNOG00000053640	Kcng2	KCNG2	1.63	0.034	1	up
ENSRNOG00000003809	Sat1	SAT1	1.62	0.0109	0.629	up
ENSRNOG00000037851	Spidr	SPIDR	1.61	0.00498	0.39	up
ENSRNOG00000038766	LOC103694328	ATXN1L	1.61	0.0468	1	up
ENSRNOG00000003300	Btg2	BTG2	1.6	0.00695	0.487	up
ENSRNOG00000043390	Samd12	SAMD12	1.6	0.00738	0.496	up
ENSRNOG00000009401	Lmo2	LMO2	1.6	0.0391	1	up
ENSRNOG00000002886	Myh10	MYH10	1.59	0.0477	1	up
ENSRNOG00000019253	Bcar1	BCAR1	1.58	0.00557	0.423	up
ENSRNOG00000012950	Efr3b	EFR3B	1.57	0.0264	1	up
ENSRNOG00000007369	Shisa4	SHISA4	1.57	0.0364	1	up
ENSRNOG00000052963	Brox	BROX	1.54	0.03	1	up
ENSRNOG00000014065	Zfp653	——	1.53	0.0145	0.732	up
ENSRNOG00000001130	Nos1	NOS1	1.52	0.0365	1	up
ENSRNOG00000021619	Cela3b	CELA3B	1.51	0.0433	1	up
ENSRNOG00000046973	Tmco3	TMCO3	1.5	0.0261	1	up
ENSRNOG00000005902	Ccdc34	CCDC34	1.48	0.0223	0.977	up
ENSRNOG00000022343	Alms1	ALMS1	1.48	0.0271	1	up
ENSRNOG00000018232	Srf	SRF	1.48	0.0412	1	up
ENSRNOG00000019476	Agap1	AGAP1	1.45	0.00974	0.577	up
ENSRNOG00000012164	Plppr2	PLPPR2	1.43	0.00195	0.211	up
ENSRNOG00000031681	AABR07026539.1	——	1.42	0.0213	0.945	up
ENSRNOG00000004925	Ppp1r12a	PPP1R12A	1.42	0.0216	0.951	up
ENSRNOG00000018111	Slc12a5	SLC12A5	1.41	0.0485	1	up
ENSRNOG00000019369	Slx1b	SLX1B	1.41	0.0491	1	up
ENSRNOG00000012820	Add3	ADD3	1.39	0.0347	1	up
ENSRNOG00000003977	Dusp1	DUSP1	1.38	0.015	0.751	up
ENSRNOG00000020205	Agrn	AGRN	1.38	0.0355	1	up
ENSRNOG00000015401	Mapk4	MAPK4	1.35	0.0359	1	up
ENSRNOG00000009078	Mrpl37	MRPL37	1.3	0.0442	1	up
ENSRNOG00000005802	Usp24	USP24	1.28	0.0371	1	up
ENSRNOG00000021068	Pip5k1a	PIP5K1A	1.27	0.0119	0.657	up
ENSRNOG00000056342	——	——	1.27	0.0423	1	up
ENSRNOG00000046521	LOC100911572	——	1.25	0.0335	1	up
ENSRNOG00000056756	Actn1	ACTN1	1.25	0.041	1	up
ENSRNOG00000051590	LOC690352	C2orf74	1.24	0.00237	0.243	up
ENSRNOG00000009286	Noxa1	NOXA1	1.24	0.0088	0.548	up
ENSRNOG00000027596	Mbd5	MBD5	1.22	0.0288	1	up
ENSRNOG00000013090	Gadd45g	GADD45G	1.2	0.0305	1	up
ENSRNOG00000025957	Ooep	OOEP	1.19	0.00954	0.569	up
ENSRNOG00000000187	Csf2rb	CSF2RB	1.19	0.0141	0.725	up
ENSRNOG00000010601	Srpk2	SRPK2	1.17	0.0135	0.717	up
ENSRNOG00000062156	Rn60——1——2431.3	——	1.17	0.0413	1	up
ENSRNOG00000010665	Ccr7	CCR7	1.14	0.00213	0.226	up
ENSRNOG00000061379	C7	C7	1.13	0.0225	0.978	up
ENSRNOG00000048121	Ercc4	ERCC4	1.11	0.0226	0.978	up
ENSRNOG00000027655	Clec4b2	CLEC4C	1.1	0.00487	0.388	up
ENSRNOG00000026196	Lrrd1	LRRD1	1.06	0.000412	0.0835	up
ENSRNOG00000046308	LOC100910308	PAICS	1.06	0.0205	0.923	up
ENSRNOG00000001284	Uncx	UNCX	1.06	0.0243	1	up
ENSRNOG00000008129	Pla2r1	PLA2R1	1.06	0.0342	1	up
ENSRNOG00000004085	Tcaim	TCAIM	1.01	0.0371	1	up
ENSRNOG00000007899	Mterf1	MTERF1	1	0.0445	1	up
