# Supplementary material for: Synergistic Network Pharmacology for Traditional Chinese Medicine Liangxue Tongyu Formula in Acute Intracerebral Hemorrhagic Stroke
Source: Neural Plast. 2021 Feb 26;2021:8874296. doi: 10.1155/2021/8874296 (PMC7936909; doi:10.1155/2021/8874296)
Supplement: Supplementary Materials — S1 Table. 517 compounds of 8 herbs in LXTYF collected from TCMSP and BATMAN-TCM database. S2 Table. 874 targets of the active ingredients obtained from the TCMSP. S3 Table. 149 targets of active components predicted from the SwissTargetPrediction database. S4 Table. 2315 targets relating to ICH collected from GAD, Genecards, and DisGeNET database. S5 Table. Topological parameters of component-target network. S6 Table. Proteins-proteins interaction information of LXTYF targets for AICH in STRING 11.0. S7 Table. Topological parameters of the PPI network. S8 Table. Results of putative targets for KEGG pathway enrichment analysis. S9 Table. Detailed information of 583 differentially expressed mRNAs identified between MGT and MG. S10 Table. Details of the Herb-Compound-Target-Pathway(H-C-T-P) network connection verified in RNA-seq. [file 8874296.f1.zip › Supplementary Table S1-S10/S10 Table.xlsx]

## Sheet: Table S10.overall
node	node2
CS	(+)-catechin
CS	(2R,3R)-4-methoxyl-distylin
CS	1-o-beta-d-glucopyranosyl-8-o-benzoylpaeonisuffrone_qt
CS	1-o-beta-d-glucopyranosylpaeonisuffrone_qt
CS	4-ethyl-paeoniflorin_qt
CS	4-o-methyl-paeoniflorin_qt
CS	8-debenzoylpaeonidanin
CS	9-ethyl-neo-paeoniaflorinA_qt
CS	Albiflorin
CS	Albiflorin_qt
CS	baicalein
CS	benzoylpaeoniflorin
CS	beta-sitosterol
CS	evofolinB
CS	isobenzoylpaeoniflorin
CS	Lactiflorin
CS	Paeoniflorigenone
CS	paeoniflorin_qt
CS	paeonol
CS	Stigmasterol
DaH	(-)-catechin
DaH	aloe-emodin
DaH	beta-sitosterol
DaH	Crysophanol
DaH	emodin
DaH	EUPATIN
DaH	Mutatochrome
DaH	Physcion
DaH	rhein
DaH	Toralactone
DiH	catalpol
DiH	Stigmasterol
DL	Xanthine
DL	Guanidine
MDP	(+)-catechin
MDP	4-O-methylpaeoniflorin_qt
MDP	benzoylpaeoniflorin
MDP	kaempferol
MDP	mudanpioside-h_qt2
MDP	paeoniflorin_qt
MDP	paeonol
MDP	quercetin
SQ	beta-sitosterol
SQ	DFV
SQ	ginsenosidef2
SQ	ginsenosiderb1
SQ	ginsenosiderh2
SQ	Mandenol
SQ	quercetin
SQ	Stigmasterol
SCP	(1R,3aS,4R,6aS)-1,4-bis(3,4-dimethoxyphenyl)-1,3,3a,4,6,6a-hexahydrofuro[4,3-c]furan
SCP	8-Isopentenyl-kaempferol
SCP	kaempferol
SCP	Marmesin
SNJ	Guanidine
SNJ	Arginine
SNJ	Alanine
Alanine	CACNA1H
beta-sitosterol	CASP3
baicalein	CASP3
aloe-emodin	CASP3
emodin	CASP3
catalpol	CASP3
quercetin	CASP3
kaempferol	CASP3
ginsenosiderh2	CASP3
beta-sitosterol	DRD1
8-debenzoylpaeonidanin	DRD1
ginsenosiderb1	DRD1
baicalein	FOS
quercetin	FOS
quercetin	MMP3
Arginine	NOS1
Alanine	NOS1
Xanthine	NOS1
(2R,3R)-4-methoxyl-distylin	NOS2
EUPATIN	NOS2
Toralactone	NOS2
kaempferol	NOS2
Arginine	NOS2
Alanine	NOS2
Lactiflorin	PTAFR
Paeoniflorigenone	PTAFR
Albiflorin	PTAFR
1-o-beta-d-glucopyranosyl-8-o-benzoylpaeonisuffrone_qt	PTAFR
1-o-beta-d-glucopyranosylpaeonisuffrone_qt	PTAFR
Albiflorin_qt	PTAFR
4-ethyl-paeoniflorin_qt	PTAFR
4-o-methyl-paeoniflorin_qt	PTAFR
9-ethyl-neo-paeoniaflorinA_qt	PTAFR
isobenzoylpaeoniflorin	PTAFR
Mutatochrome	PTAFR
benzoylpaeoniflorin	PTAFR
4-O-methylpaeoniflorin_qt	PTAFR
ginsenosidef2	PTAFR
beta-sitosterol	PTGS2
Stigmasterol	PTGS2
(+)-catechin	PTGS2
baicalein	PTGS2
(2R,3R)-4-methoxyl-distylin	PTGS2
paeonol	PTGS2
evofolinB	PTGS2
1-o-beta-d-glucopyranosyl-8-o-benzoylpaeonisuffrone_qt	PTGS2
(-)-catechin	PTGS2
aloe-emodin	PTGS2
EUPATIN	PTGS2
rhein	PTGS2
Toralactone	PTGS2
emodin	PTGS2
Crysophanol	PTGS2
Physcion	PTGS2
quercetin	PTGS2
kaempferol	PTGS2
Mandenol	PTGS2
DFV	PTGS2
ginsenosiderh2	PTGS2
Marmesin	PTGS2
8-Isopentenyl-kaempferol	PTGS2
(1R,3aS,4R,6aS)-1,4-bis(3,4-dimethoxyphenyl)-1,3,3a,4,6,6a-hexahydrofuro[4,3-c]furan	PTGS2
mudanpioside-h_qt2	RYR2
paeoniflorin_qt	RYR3
mudanpioside-h_qt2	RYR3
Alanine	RYR3
Guanidine	RYR3
Alanine	VDAC1
Alanine	VDAC3
ARNT	HIF-1 signaling pathway
BAG4	TNF signaling pathway
CACNA1H	MAPK signaling pathway
CACNA1H	Calcium signaling pathway
CASP3	MAPK signaling pathway
CASP3	Apoptosis
CASP3	TNF signaling pathway
CASP6	Apoptosis
CFLAR	Apoptosis
CFLAR	TNF signaling pathway
CSF2RB	Apoptosis
DIABLO	Apoptosis
DRD1	Calcium signaling pathway
DRD1	cAMP signaling pathway
DUSP1	MAPK signaling pathway
ENO2	HIF-1 signaling pathway
FGF14	MAPK signaling pathway
FOS	MAPK signaling pathway
FOS	Apoptosis
FOS	TNF signaling pathway
FOS	cAMP signaling pathway
GADD45G	MAPK signaling pathway
GADD45G	Apoptosis
GRIA3	cAMP signaling pathway
GUCY1A2	cGMP-PKG signaling pathway
JUNB	TNF signaling pathway
MEF2C	MAPK signaling pathway
MEF2C	cGMP-PKG signaling pathway
MMP3	TNF signaling pathway
NLK	MAPK signaling pathway
NOS1	Calcium signaling pathway
NOS2	Calcium signaling pathway
NOS2	HIF-1 signaling pathway
NPY1R	cAMP signaling pathway
NR4A1	MAPK signaling pathway
PARP2	Apoptosis
PDHA1	HIF-1 signaling pathway
PHKA2	Calcium signaling pathway
PPP1R12A	cGMP-PKG signaling pathway
PPP1R12A	cAMP signaling pathway
PTAFR	Calcium signaling pathway
PTGS2	TNF signaling pathway
RYR2	Calcium signaling pathway
RYR2	cAMP signaling pathway
RYR3	Calcium signaling pathway
SLC8A2	Calcium signaling pathway
SLC8A2	cGMP-PKG signaling pathway
SRF	MAPK signaling pathway
SRF	cGMP-PKG signaling pathway
TAOK2	MAPK signaling pathway
VAV3	cAMP signaling pathway
VDAC1	Calcium signaling pathway
VDAC1	cGMP-PKG signaling pathway
VDAC3	Calcium signaling pathway
VDAC3	cGMP-PKG signaling pathway

## Sheet: herb-compound
Network level	Connections
	Node1	Node2
Herb-Compounnd	CS	(+)-catechin，(2R,3R)-4-methoxyl-distylin，1-o-beta-d-glucopyranosyl-8-o-benzoylpaeonisuffrone_qt，1-o-beta-d-glucopyranosylpaeonisuffrone_qt，baicalein，benzoylpaeoniflorin，beta-sitosterol，evofolinB，isobenzoylpaeoniflorin,Lactiflorin，Paeoniflorigenone，paeoniflorin_qt，paeonol，4-ethyl-paeoniflorin_qt，4-o-methyl-paeoniflorin_qt，8-debenzoylpaeonidanin，9-ethyl-neo-paeoniaflorinA_qt，Albiflorin，Albiflorin_q…
	DaH	(-)-catechin，aloe-emodin，beta-sitosterol，Crysophanol，emodin，EUPATIN，Mutatochrome，Physcion，rhein，Toralactone
	DiH	catalpol，Stigmasterol
	DL	Xanthine，Guanidine
	MDP	(+)-catechin，4-O-methylpaeoniflorin_qt，benzoylpaeoniflorin，kaempferol，mudanpioside-h_qt2，paeoniflorin_qt，paeonol，quercetin
	SCP	(1R,3aS,4R,6aS)-1,4-bis(3,4-dimethoxyphenyl)-1,3,3a,4,6,6a-hexahydrofuro[4,3-c]furan，8-Isopentenyl-kaempferol，kaempferol，Marmesin
	SNJ	Guanidine，Arginine，Alanine
	SQ	beta-sitosterol，DFV，ginsenosidef2，ginsenosiderb1，ginsenosiderh2，Mandenol，quercetin，Stigmasterol

## Sheet: compound-target
Network level	Connections
	Node1	Node2
Compound-Target	(-)-catechin	PTGS2
	(+)-catechin	PTGS2
	(1R,3aS,4R,6aS)-1,4-bis(3,4-dimethoxyphenyl)-1,3,3a,4,6,6a-hexahydrofuro[4,3-c]furan	PTGS2
	(2R,3R)-4-methoxyl-distylin	NOS2,PTGS2
	1-o-beta-d-glucopyranosyl-8-o-benzoylpaeonisuffrone_qt	PTAFR,PTGS2
	1-o-beta-d-glucopyranosylpaeonisuffrone_qt	PTAFR
	4-ethyl-paeoniflorin_qt	PTAFR
	4-O-methylpaeoniflorin_qt	PTAFR
	4-o-methyl-paeoniflorin_qt	PTAFR
	8-debenzoylpaeonidanin	DRD1
	8-Isopentenyl-kaempferol	PTGS2
	9-ethyl-neo-paeoniaflorinA_qt	PTAFR
	Alanine	CACNA1H,NOS1,NOS2,RYR3,VDAC1,VDAC3,
	Albiflorin	PTAFR
	Albiflorin_qt	PTAFR
	aloe-emodin	CASP3,PTGS2
	Arginine	NOS1,NOS2
	baicalein	CASP3,FOS,PTGS2
	benzoylpaeoniflorin	PTAFR
	beta-sitosterol	CASP3,DRD1,PTGS2
	catalpol	CASP3
	Crysophanol	PTGS2
	DFV	PTGS2
	emodin	CASP3,PTGS2
	EUPATIN	NOS2,PTGS2
	evofolinB	PTGS2
	ginsenosidef2	PTAFR
	ginsenosiderb1	DRD1
	ginsenosiderh2	CASP3,PTGS2
	Guanidine	RYR3
	isobenzoylpaeoniflorin	PTAFR
	kaempferol	CASP3,NOS2,PTGS2
	Lactiflorin	PTAFR
	Mandenol	PTGS2
	Marmesin	PTGS2
	mudanpioside-h_qt2	RYR2,RYR3
	Mutatochrome	PTAFR
	Paeoniflorigenone	PTAFR
	paeoniflorin_qt	RYR3
	paeonol	PTGS2
	Physcion	PTGS2
	quercetin	CASP3,FOS,MMP3,PTGS2
	rhein	PTGS2
	Stigmasterol	PTGS2
	Toralactone	NOS2,PTGS2
	Xanthine	NOS1

## Sheet: target-pathway
Network level	Connections
	Node1	Node2
Target-Pathway	ARNT	HIF-1 signaling pathway
	BAG4	TNF signaling pathway
	CACNA1H	MAPK signaling pathway,Calcium signaling pathway
	CASP3	MAPK signaling pathway,Apoptosis,TNF signaling pathway
	CASP6	Apoptosis
	CFLAR	Apoptosis,TNF signaling pathway
	CSF2RB	Apoptosis
	DIABLO	Apoptosis
	DRD1	Calcium signaling pathway,cAMP signaling pathway
	DUSP1	MAPK signaling pathway
	ENO2	HIF-1 signaling pathway
	FGF14	MAPK signaling pathway
	FOS	MAPK signaling pathway,Apoptosis,TNF signaling pathway,cAMP signaling pathway
	GADD45G	MAPK signaling pathway,Apoptosis
	GRIA3	cAMP signaling pathway
	GUCY1A2	cGMP-PKG signaling pathway
	JUNB	TNF signaling pathway
	MEF2C	MAPK signaling pathway,cGMP-PKG signaling pathway
	MMP3	TNF signaling pathway
	NLK	MAPK signaling pathway
	NOS1	Calcium signaling pathway
	NOS2	Calcium signaling pathway,HIF-1 signaling pathway
	NPY1R	cAMP signaling pathway
	NR4A1	MAPK signaling pathway
	PARP2	Apoptosis
	PDHA1	HIF-1 signaling pathway
	PHKA2	Calcium signaling pathway
	PPP1R12A	cGMP-PKG signaling pathway,cAMP signaling pathway
	PTAFR	Calcium signaling pathway
	PTGS2	TNF signaling pathway
	RYR2	Calcium signaling pathway,cAMP signaling pathway
	RYR3	Calcium signaling pathway
	SLC8A2	Calcium signaling pathway,cGMP-PKG signaling pathway
	SRF	MAPK signaling pathway,cGMP-PKG signaling pathway
	TAOK2	MAPK signaling pathway
	VAV3	cAMP signaling pathway
	VDAC1	Calcium signaling pathway,cGMP-PKG signaling pathway
	VDAC3	Calcium signaling pathway,cGMP-PKG signaling pathway
